# Supplementary material for: The nematode Caenorhabditis elegans and diverse potential invertebrate vectors predominantly interact opportunistically
Source: Frontiers journal article supplement (doi:10.3389/fevo.2023.1069056), 2023-02-01
Supplement: Table_2.XLSX [file Table_2.XLSX]

## Sheet: 2B O. asellus extract
Statsistics Figure 2B and Supplementary Figure S3A, Wilcoxon, FDR-corrected
Chemotaxis of C. elegans L4 stages towards O. asellus extract (n = 9-10)
treatment	worm strain	solvent	p-value	corrected p-value*
extract	N2	H2O	1	1
extract	N2	EtOH	0.160156	0.205915
extract	N2	DMSO	0.759614	0.804298
extract	MY2079	H2O	0.0117188	0.016226
extract	MY2079	EtOH	0.343253	0.386159
extract	MY2079	DMSO	0.193359	0.232031
isoamylalc	N2	H2O	0.00390625	0.00703125
isoamylalc	N2	EtOH	0.00195312	0.00502232
isoamylalc	N2	DMSO	0.00390625	0.00703125
isoamylalc	MY2079	H2O	0.00195312	0.00502232
isoamylalc	MY2079	EtOH	0.00195312	0.00502232
isoamylalc	MY2079	DMSO	0.00195312	0.00502232
octanol	N2	H2O	0.00588927	0.0088339
octanol	N2	EtOH	0.00195312	0.00502232
octanol	N2	DMSO	0.00195312	0.00502232
octanol	MY2079	H2O	0.00195312	0.00502232
octanol	MY2079	EtOH	0.00588927	0.0088339
octanol	MY2079	DMSO	0.00390625	0.00703125
Chemotaxis of C. elegans dauer stages towards O. asellus extract (n = 9-17)
treatment	worm strain	solvent	p-value	corrected p-value*
extract	N2	H2O	0.441209	0.49636
extract	N2	EtOH	0.556298	0.589022
extract	N2	DMSO	0.182893	0.268235
extract	MY2079	H2O	0.193726	0.268235
extract	MY2079	EtOH	0.00537109	0.0138114
extract	MY2079	DMSO	0.776381	0.776381
isoamylalc	N2	H2O	0.192127	0.268235
isoamylalc	N2	EtOH	0.0128512	0.0289153
isoamylalc	N2	DMSO	0.131333	0.236399
isoamylalc	MY2079	H2O	0.00012207	0.00109863
isoamylalc	MY2079	EtOH	0.000610352	0.00274658
isoamylalc	MY2079	DMSO	0.00109705	0.00394938
octanol	N2	H2O	0.102694	0.205388
octanol	N2	EtOH	0.266402	0.342517
octanol	N2	DMSO	0.287726	0.345271
octanol	MY2079	H2O	0.00012207	0.00109863
octanol	MY2079	EtOH	0.000183106	0.00109863
octanol	MY2079	DMSO	0.00209764	0.00629293
* significant p-values are given in bold

## Sheet: 2C P. scaber extract
Statsistics Figure 2C and Supplementary Figure S3B Wilcoxon, FDR-corrected
Chemotaxis of C. elegans L4 stages towards P. scaber extract (n = 9-10)
treatment	worm strain	solvent	p-value	corrected p-value*
extract	N2	H2O	0.0390625	0.0439453
extract	N2	EtOH	0.128906	0.136489
extract	N2	DMSO	0.00195312	0.00439453
extract	MY2079	H2O	0.0136719	0.0175781
extract	MY2079	EtOH	1	1
extract	MY2079	DMSO	0.0273438	0.0328125
isoamylalc	N2	H2O	0.00560319	0.00815437
isoamylalc	N2	EtOH	0.00195312	0.00439453
isoamylalc	N2	DMSO	0.00588927	0.00815437
isoamylalc	MY2079	H2O	0.00195312	0.00439453
isoamylalc	MY2079	EtOH	0.00195312	0.00439453
isoamylalc	MY2079	DMSO	0.00195312	0.00439453
octanol	N2	H2O	0.00195312	0.00439453
octanol	N2	EtOH	0.00195312	0.00439453
octanol	N2	DMSO	0.00195312	0.00439453
octanol	MY2079	H2O	0.00390625	0.00703125
octanol	MY2079	EtOH	0.00588927	0.00815437
octanol	MY2079	DMSO	0.00390625	0.00703125
Chemotaxis of C. elegans dauer stages towards P. scaber extract (n = 11-14)
treatment	worm strain	solvent	p-value	corrected p-value*
extract	N2	H2O	0.759614	0.804298
extract	N2	EtOH	0.259974	0.359965
extract	N2	DMSO	0.959327	0.959327
extract	MY2079	H2O	0.556641	0.715681
extract	MY2079	EtOH	0.232422	0.348633
extract	MY2079	DMSO	0.695312	0.804298
isoamylalc	N2	H2O	0.000976562	0.0117188
isoamylalc	N2	EtOH	0.00988892	0.0254287
isoamylalc	N2	DMSO	0.0127038	0.0285835
isoamylalc	MY2079	H2O	0.00195312	0.0117188
isoamylalc	MY2079	EtOH	0.00585938	0.0175781
isoamylalc	MY2079	DMSO	0.00195312	0.0117188
octanol	N2	H2O	0.0273438	0.0492187
octanol	N2	EtOH	0.123534	0.202147
octanol	N2	DMSO	0.722049	0.804298
octanol	MY2079	H2O	0.00585938	0.0175781
octanol	MY2079	EtOH	0.00390625	0.0175781
octanol	MY2079	DMSO	0.0178172	0.0356344
* significant p-values are given in bold

## Sheet: 2D Armadillidium sp. extract
Statsistics Figure 2D and Supplementary Figure S3C, Wilcoxon, FDR-corrected
Chemotaxis of C. elegans L4 stages towards Armadillidium sp. extract (n = 11)
treatment	worm strain	solvent	p-value	p-value corrected*
extract	N2	H2O	0.0129	0.0165
extract	N2	EtOH	0.0039	0.0054
extract	N2	DMSO	0.1016	0.1016
extract	MY2079	H2O	0.0186	0.0223
extract	MY2079	EtOH	0.044	0.0466
extract	MY2079	DMSO	0.021	0.0236
isoamylalc	N2	H2O	0.002	0.0039
isoamylalc	N2	EtOH	0.0039	0.0054
isoamylalc	N2	DMSO	0.002	0.0039
isoamylalc	MY2079	H2O	0.001	0.0039
isoamylalc	MY2079	EtOH	0.002	0.0039
isoamylalc	MY2079	DMSO	0.0005	0.0039
octanol	N2	H2O	0.0039	0.0054
octanol	N2	EtOH	0.0039	0.0054
octanol	N2	DMSO	0.002	0.0039
octanol	MY2079	H2O	0.001	0.0039
octanol	MY2079	EtOH	0.002	0.0039
octanol	MY2079	DMSO	0.0005	0.0039
Chemotaxis of C. elegans dauer stages towards Armadillidium sp. extract (n = 11-18)
treatment	worm strain	solvent	p-value	p-value corrected
extract	N2	H2O	0.801541	0.901733
extract	N2	EtOH	0.700442	0.840531
extract	N2	DMSO	0.0297729	0.0589807
extract	MY2079	H2O	0.916487	0.916487
extract	MY2079	EtOH	0.893904	0.916487
extract	MY2079	DMSO	0.462934	0.595201
isoamylalc	N2	H2O	0.0308066	0.0589807
isoamylalc	N2	EtOH	0.167725	0.232234
isoamylalc	N2	DMSO	0.0806128	0.120919
isoamylalc	MY2079	H2O	0.000244141	0.00219727
isoamylalc	MY2079	EtOH	0.00640346	0.0288156
isoamylalc	MY2079	DMSO	0.0012207	0.00732422
octanol	N2	H2O	0.0302259	0.0589807
octanol	N2	EtOH	0.032767	0.0589807
octanol	N2	DMSO	0.00012207	0.00219727
octanol	MY2079	H2O	0.0681152	0.111461
octanol	MY2079	EtOH	0.0167287	0.0501861
octanol	MY2079	DMSO	0.010498	0.037793
* significant p-values are given in bold

## Sheet: 2E Lithobius extract
Statsistics Figure 2E and Supplementary Figure S3D, Wilcoxon, FDR-corrected
Chemotaxis of C. elegans L4 stages towards Lithobius sp. extract (n = 15)
treatment	worm strain	solvent	p-value	corrected p-value*
extract	N2	H2O	0.0266113	0.0342146
extract	N2	EtOH	0.0681152	0.0817383
extract	N2	DMSO	0.497314	0.559479
extract	MY2079	H2O	0.684814	0.725098
extract	MY2079	EtOH	0.0253699	0.0342146
extract	MY2079	DMSO	0.906329	0.906329
isoamylalc	N2	H2O	0.000244141	0.000488281
isoamylalc	N2	EtOH	0.00165625	0.00271022
isoamylalc	N2	DMSO	0.000244141	0.000488281
isoamylalc	MY2079	H2O	0.000244141	0.000488281
isoamylalc	MY2079	EtOH	0.000244141	0.000488281
isoamylalc	MY2079	DMSO	0.000244141	0.000488281
octanol	N2	H2O	0.000244141	0.000488281
octanol	N2	EtOH	0.000244141	0.000488281
octanol	N2	DMSO	0.000244141	0.000488281
octanol	MY2079	H2O	0.00209863	0.00314794
octanol	MY2079	EtOH	0.000488281	0.000878906
octanol	MY2079	DMSO	0.000244141	0.000488281
Chemotaxis of C. elegans dauer stages towards Lithobius sp. extract (n = 13-15)
treatment	worm strain	solvent	p-value	corrected p-value*
extract	N2	H2O	0.221272	0.331908
extract	N2	EtOH	0.755424	0.849852
extract	N2	DMSO	0.102694	0.184849
extract	MY2079	H2O	0.946045	0.968712
extract	MY2079	EtOH	0.497314	0.648981
extract	MY2079	DMSO	0.968712	0.968712
isoamylalc	N2	H2O	0.00800431	0.0205825
isoamylalc	N2	EtOH	0.0037876	0.0113628
isoamylalc	N2	DMSO	0.0112782	0.0253759
isoamylalc	MY2079	H2O	0.000244141	0.00109863
isoamylalc	MY2079	EtOH	0.000244141	0.00109863
isoamylalc	MY2079	DMSO	0.000244141	0.00109863
octanol	N2	H2O	0.540818	0.648981
octanol	N2	EtOH	0.5143	0.648981
octanol	N2	DMSO	0.220972	0.331908
octanol	MY2079	H2O	0.00170898	0.00615234
octanol	MY2079	EtOH	0.000244141	0.00109863
octanol	MY2079	DMSO	0.0376329	0.0752658
* significant p-values are given in bold

## Sheet: 2F D. melanogaster extract
Statsistics Figure 2F and Supplementary Figure S3E, Wilcoxon, FDR-corrected
Chemotaxis of C. elegans L4 stages towards D. melanogaster extract (n = 12)
treatment	worm strain	solvent	p-value	corrected p-value*
extract	N2	H2O	0.50488	0.534579
extract	N2	EtOH	0.893904	0.893904
extract	N2	DMSO	0.0771484	0.106821
extract	MY2079	H2O	0.339355	0.381775
extract	MY2079	EtOH	0.339355	0.381775
extract	MY2079	DMSO	0.220972	0.284107
isoamylalc	N2	H2O	0.000488281	0.000799006
isoamylalc	N2	EtOH	0.000488281	0.000799006
isoamylalc	N2	DMSO	0.000488281	0.000799006
isoamylalc	MY2079	H2O	0.000488281	0.000799006
isoamylalc	MY2079	EtOH	0.000488281	0.000799006
isoamylalc	MY2079	DMSO	0.000488281	0.000799006
octanol	N2	H2O	0.000488281	0.000799006
octanol	N2	EtOH	0.000488281	0.000799006
octanol	N2	DMSO	0.000488281	0.000799006
octanol	MY2079	H2O	0.000488281	0.000799006
octanol	MY2079	EtOH	0.000488281	0.000799006
octanol	MY2079	DMSO	0.000976562	0.00146484
Chemotaxis of C. elegans dauer stages towards D. melanogaster extract (n = 11-12)
treatment	worm strain	solvent	p-value	corrected p-value*
extract	N2	H2O	0.235314	0.360764
extract	N2	EtOH	0.952724	0.952724
extract	N2	DMSO	0.540555	0.640503
extract	MY2079	H2O	0.791016	0.837546
extract	MY2079	EtOH	0.569336	0.640503
extract	MY2079	DMSO	0.423828	0.544922
isoamylalc	N2	H2O	0.00800431	0.0240129
isoamylalc	N2	EtOH	0.0800579	0.144104
isoamylalc	N2	DMSO	0.00244141	0.00878906
isoamylalc	MY2079	H2O	0.000488281	0.00292969
isoamylalc	MY2079	EtOH	0.000488281	0.00292969
isoamylalc	MY2079	DMSO	0.000488281	0.00292969
octanol	N2	H2O	0.266113	0.368465
octanol	N2	EtOH	0.24051	0.360764
octanol	N2	DMSO	0.0144348	0.0371181
octanol	MY2079	H2O	0.00195312	0.00878906
octanol	MY2079	EtOH	0.0266113	0.0598755
octanol	MY2079	DMSO	0.0419922	0.0839844
* significant p-values are given in bold

## Sheet: 3A Slug mucus
Statsistics Figure 3A, Wilcoxon, FDR-corrected
Chemotaxis of C. elegans L4 stages towards Arion sp. mucus (n = 11)
treatment	worm strain	p-value	corrected p-value*
empty vs empty	N2	0.898438	1
empty vs empty	MY2079	1	1
mucus vs empty	N2	0.831055	1
mucus vs empty	MY2079	0.898438	1
Chemotaxis of C. elegans dauer stages towards Arion sp. mucus (n = 13)
treatment	worm strain	p-value	corrected p-value*
empty vs empty	N2	0.243896	0.487793
empty vs empty	MY2079	0.0170898	0.0683594
mucus vs empty	N2	0.587891	0.783854
mucus vs empty	MY2079	0.946045	0.946045

## Sheet: 3B Slug feces
Statsistics Figure 3B and Supplementary Figure S3F, Wilcoxon, FDR-corrected
Chemotaxis of C. elegans L4 stages towards Arion sp. feces (n = 11)
treatment	worm strain	solvent	p-value	corrected p-value*
feces	N2	H2O	0.838464	0.943272
feces	N2	EtOH	0.0244141	0.0338041
feces	N2	DMSO	0.964506	0.964506
feces	MY2079	H2O	0.918813	0.964506
feces	MY2079	EtOH	0.365234	0.469587
feces	MY2079	DMSO	0.406941	0.488329
isoamylalc	N2	H2O	0.000976562	0.00175781
isoamylalc	N2	EtOH	0.000976562	0.00175781
isoamylalc	N2	DMSO	0.000976562	0.00175781
isoamylalc	MY2079	H2O	0.000488281	0.00175781
isoamylalc	MY2079	EtOH	0.00195312	0.00319602
isoamylalc	MY2079	DMSO	0.0038398	0.0057597
octanol	N2	H2O	0.000976562	0.00175781
octanol	N2	EtOH	0.000976562	0.00175781
octanol	N2	DMSO	0.000976562	0.00175781
octanol	MY2079	H2O	0.000976562	0.00175781
octanol	MY2079	EtOH	0.000976562	0.00175781
octanol	MY2079	DMSO	0.000976562	0.00175781
Chemotaxis of C. elegans dauer stages towards Arion sp. feces (n = 9-13)
treatment	worm strain	solvent	p-value	corrected p-value*
feces	N2	H2O	0.413086	0.571965
feces	N2	EtOH	0.528612	0.679644
feces	N2	DMSO	0.850098	0.900103
feces	MY2079	H2O	0.0478516	0.0957031
feces	MY2079	EtOH	0.786865	0.885223
feces	MY2079	DMSO	0.786865	0.885223
isoamylalc	N2	H2O	0.00868612	0.0195438
isoamylalc	N2	EtOH	0.00533759	0.0137707
isoamylalc	N2	DMSO	0.058024	0.104443
isoamylalc	MY2079	H2O	0.00419259	0.0137707
isoamylalc	MY2079	EtOH	0.00252617	0.0137707
isoamylalc	MY2079	DMSO	0.00332374	0.0137707
octanol	N2	H2O	0.00390625	0.0137707
octanol	N2	EtOH	1	1
octanol	N2	DMSO	0.236137	0.386406
octanol	MY2079	H2O	0.00535526	0.0137707
octanol	MY2079	EtOH	0.00385729	0.0137707
octanol	MY2079	DMSO	0.289587	0.434381
* significant p-values are given in bold
