# Supplementary material for: The nematode Caenorhabditis elegans and diverse potential invertebrate vectors predominantly interact opportunistically
Source: Frontiers journal article supplement (doi:10.3389/fevo.2023.1069056), 2023-02-01
Supplement: Table_3.XLSX [file Table_3.XLSX]

## Sheet: 4B O. asellus odor
Statsistics Figure 4B and Supplementary Figure S4A, Wilcoxon, FDR-corrected
Chemotaxis of C. elegans L4 stages towards O. asellus odor (n = 11)
treatment	worm strain	p-value	p-value corrected*
isopod	N2	0.206055	0.329688
isopod	MY2079	0.610299	0.697484
isoamylalc	N2	0.000976562	0.00390625
isoamylalc	MY2079	0.000976562	0.00390625
octanol	N2	0.00195312	0.00520833
octanol	MY2079	0.00488281	0.00976562
empty	N2	0.831055	0.831055
empty	MY2079	0.464844	0.619792
Chemotaxis of C. elegans dauer stages towards O. asellus odor (n = 11)
treatment	worm strain	p-value	p-value corrected*
isopod	N2	0.831055	0.949777
isopod	MY2079	1	1
isoamylalc	N2	0.000976562	0.0078125
isoamylalc	MY2079	0.00488281	0.0195312
octanol	N2	0.0665457	0.177455
octanol	MY2079	0.700195	0.933594
empty	N2	0.147461	0.294922
empty	MY2079	0.358951	0.574322
* significant p-values are given in bold

## Sheet: 4C P. scaber odor
Statsistics Figure 4C and Supplementary Figure S4B, Wilcoxon, FDR-corrected
Chemotaxis of C. elegans L4 stages towards P. scaber odor (n = 11)
treatment	worm strain	p-value	p-value corrected*
isopod	N2	0.610299	0.728795
isopod	MY2079	0.414823	0.663717
isoamylalc	N2	0.0038398	0.0102395
isoamylalc	MY2079	0.00195312	0.0078125
octanol	N2	0.00195312	0.0078125
octanol	MY2079	0.0830078	0.166016
empty	N2	0.759766	0.759766
empty	MY2079	0.637695	0.728795
Chemotaxis of C. elegans dauer stages towards P. scaber odor (n = 11)
treatment	worm strain	p-value	p-value corrected*
isopod	N2	0.759766	0.868304
isopod	MY2079	0.96582	0.96582
isoamylalc	N2	0.00195312	0.0117188
isoamylalc	MY2079	0.00292969	0.0117188
octanol	N2	0.0673828	0.134766
octanol	MY2079	0.0244141	0.0651042
empty	N2	0.519531	0.692708
empty	MY2079	0.147461	0.235937
* significant p-values are given in bold

## Sheet: 4D Armadillidium sp. odor
Statsistics Figure 4D and Supplementary Figure S4C, Wilcoxon, FDR-corrected
Chemotaxis of C. elegans L4 stages towards Armadillidium sp. odor (n = 11)
treatment	worm strain	p-value	p-value corrected*
isopod	N2	0.397608	0.530145
isopod	MY2079	0.175077	0.280124
isoamylalc	N2	6.87592e-10	< 0.001
isoamylalc	MY2079	6.12923e-05	0.000163446
octanol	N2	2.59078e-06	< 0.001
octanol	MY2079	0.0482241	0.0964481
empty	N2	0.882441	0.973362
empty	MY2079	0.973362	0.973362
Chemotaxis of C. elegans dauer stages towards Armadillidium sp. odor (n = 11)
treatment	worm strain	p-value	p-value corrected*
isopod	N2	0.759766	0.831055
isopod	MY2079	0.831055	0.831055
isoamylalc	N2	0.0038398	0.0153592
isoamylalc	MY2079	0.000976562	0.0078125
octanol	N2	0.240234	0.320312
octanol	MY2079	0.0419922	0.107422
empty	N2	0.0537109	0.107422
empty	MY2079	0.102918	0.164668
* significant p-values are given in bold

## Sheet: 4E Lithobius sp. odor
Statsistics Figure 4E and Supplementary Figure S4D, Wilcoxon, FDR-corrected
Chemotaxis of C. elegans L4 stages towards Lithobius sp. odor (n = 12)
treatment	worm strain	p-value	p-value corrected*
Lithobius sp.	N2	0.656483	0.750266
Lithobius sp.	MY2079	0.0922852	0.147656
isoamylalc	N2	0.00250684	0.0100274
isoamylalc	MY2079	0.000976562	0.0078125
octanol	N2	0.00385729	0.0102861
octanol	MY2079	0.0268555	0.0537109
empty	N2	0.959327	0.959327
empty	MY2079	0.409937	0.546582
Chemotaxis of C. elegans dauer stages towards Lithobius sp. odor (n = 11-12)
treatment	worm strain	p-value	p-value corrected*
Lithobius sp.	N2	0.502382	0.669843
Lithobius sp.	MY2079	0.786472	0.898825
isoamylalc	N2	1.61099e-12	< 0.001
isoamylalc	MY2079	1.18295e-08	< 0.001
octanol	N2	0.0522366	0.104473
octanol	MY2079	0.0244622	0.0652325
empty	N2	0.469517	0.669843
empty	MY2079	0.928301	0.928301
* significant p-values are given in bold

## Sheet: 4F D. melanogater odor
Statsistics Figure 4F and Supplementary Figure S4E, Wilcoxon, FDR-corrected
Chemotaxis of C. elegans L4 stages towards D. melanogaster odor (n = 11-12)
treatment	worm strain	p-value	p-value corrected*
Drosophila	N2	0.00385729	0.00617167
Drosophila	MY2079	0.154656	0.206208
isoamylalc	N2	0.00325181	0.00617167
isoamylalc	MY2079	0.0025165	0.00617167
octanol	N2	0.000488281	0.00390625
octanol	MY2079	0.00385729	0.00617167
empty	N2	0.791016	0.791016
empty	MY2079	0.518555	0.592634
Chemotaxis of C. elegans dauer stages towards D. melanogaster odor (n = 11-12)
treatment	worm strain	p-value	p-value corrected*
Drosophila	N2	0.0537109	0.143229
Drosophila	MY2079	0.129395	0.258789
isoamylalc	N2	0.000488281	0.00195312
isoamylalc	MY2079	0.000488281	0.00195312
octanol	N2	0.72398	0.755658
octanol	MY2079	0.569336	0.755658
empty	N2	0.755658	0.755658
empty	MY2079	0.677246	0.755658
* significant p-values are given in bold
