# Supplementary material for: The nematode Caenorhabditis elegans and diverse potential invertebrate vectors predominantly interact opportunistically
Source: Frontiers journal article supplement (doi:10.3389/fevo.2023.1069056), 2023-02-01
Supplement: Table_4.XLSX [file Table_4.XLSX]

## Sheet: 1B O. asellus wash L4
assay	invertebrate_species	rep	worm_strain	stage	choice_treat	solvent	count_treat	count_solvent	total	index	include	comments
wash	Oniscus asellus	1	MY2079	L4	isoamylalc	DMSO	65	18	83	0.566265	yes
wash	Oniscus asellus	1	MY2079	L4	isoamylalc	EtOH	64	7	71	0.802817	yes
wash	Oniscus asellus	1	MY2079	L4	isoamylalc	H2O	76	17	93	0.634409	yes
wash	Oniscus asellus	1	MY2079	L4	octanol	DMSO	18	67	85	-0.576471	yes
wash	Oniscus asellus	1	MY2079	L4	octanol	EtOH	18	65	83	-0.566265	yes
wash	Oniscus asellus	1	MY2079	L4	octanol	H2O	3	77	80	-0.925	yes
wash	Oniscus asellus	1	MY2079	L4	wash	DMSO	22	20	42	0.047619	yes
wash	Oniscus asellus	1	MY2079	L4	wash	EtOH	24	25	49	-0.0204082	yes
wash	Oniscus asellus	1	MY2079	L4	wash	H2O	32	29	61	0.0491803	yes
wash	Oniscus asellus	1	N2	L4	isoamylalc	DMSO	66	5	71	0.859155	yes
wash	Oniscus asellus	1	N2	L4	isoamylalc	EtOH	67	19	86	0.55814	yes
wash	Oniscus asellus	1	N2	L4	isoamylalc	H2O	99	11	110	0.8	yes
wash	Oniscus asellus	1	N2	L4	octanol	DMSO	12	52	64	-0.625	yes
wash	Oniscus asellus	1	N2	L4	octanol	EtOH	23	76	99	-0.535354	yes
wash	Oniscus asellus	1	N2	L4	octanol	H2O	29	69	98	-0.408163	yes
wash	Oniscus asellus	1	N2	L4	wash	DMSO	21	28	49	-0.142857	yes
wash	Oniscus asellus	1	N2	L4	wash	EtOH	47	36	83	0.13253	yes
wash	Oniscus asellus	1	N2	L4	wash	H2O	64	42	106	0.207547	yes
wash	Oniscus asellus	2	MY2079	L4	isoamylalc	DMSO	43	16	59	0.457627	yes
wash	Oniscus asellus	2	MY2079	L4	isoamylalc	EtOH	48	8	56	0.714286	yes
wash	Oniscus asellus	2	MY2079	L4	isoamylalc	H2O	52	11	63	0.650794	yes
wash	Oniscus asellus	2	MY2079	L4	octanol	DMSO	2	37	39	-0.897436	yes
wash	Oniscus asellus	2	MY2079	L4	octanol	EtOH	8	26	34	-0.529412	yes
wash	Oniscus asellus	2	MY2079	L4	octanol	H2O	12	39	51	-0.529412	yes
wash	Oniscus asellus	2	MY2079	L4	wash	DMSO	29	26	55	0.0545455	yes
wash	Oniscus asellus	2	MY2079	L4	wash	EtOH	23	24	47	-0.0212766	yes
wash	Oniscus asellus	2	MY2079	L4	wash	H2O	35	35	70	0	yes
wash	Oniscus asellus	2	N2	L4	isoamylalc	DMSO	75	10	85	0.764706	yes
wash	Oniscus asellus	2	N2	L4	isoamylalc	EtOH	70	14	84	0.666667	yes
wash	Oniscus asellus	2	N2	L4	isoamylalc	H2O	38	0	38	1	yes
wash	Oniscus asellus	2	N2	L4	octanol	DMSO	8	98	106	-0.849057	yes
wash	Oniscus asellus	2	N2	L4	octanol	EtOH	6	68	74	-0.837838	yes
wash	Oniscus asellus	2	N2	L4	octanol	H2O	6	87	93	-0.870968	yes
wash	Oniscus asellus	2	N2	L4	wash	DMSO	34	45	79	-0.139241	yes
wash	Oniscus asellus	2	N2	L4	wash	EtOH	26	19	45	0.155556	yes
wash	Oniscus asellus	2	N2	L4	wash	H2O	37	43	80	-0.075	yes
wash	Oniscus asellus	3	MY2079	L4	isoamylalc	DMSO	34	18	52	0.307692	yes
wash	Oniscus asellus	3	MY2079	L4	isoamylalc	EtOH	26	16	42	0.238095	yes
wash	Oniscus asellus	3	MY2079	L4	isoamylalc	H2O	35	10	45	0.555556	yes
wash	Oniscus asellus	3	MY2079	L4	octanol	DMSO	5	33	38	-0.736842	yes
wash	Oniscus asellus	3	MY2079	L4	octanol	EtOH	5	35	40	-0.75	yes
wash	Oniscus asellus	3	MY2079	L4	octanol	H2O	1	47	48	-0.958333	yes
wash	Oniscus asellus	3	MY2079	L4	wash	DMSO	29	38	67	-0.134328	yes
wash	Oniscus asellus	3	MY2079	L4	wash	EtOH	26	32	58	-0.103448	yes
wash	Oniscus asellus	3	MY2079	L4	wash	H2O	27	23	50	0.08	yes
wash	Oniscus asellus	3	N2	L4	isoamylalc	DMSO	47	19	66	0.424242	yes
wash	Oniscus asellus	3	N2	L4	isoamylalc	EtOH	44	8	52	0.692308	yes
wash	Oniscus asellus	3	N2	L4	isoamylalc	H2O	43	13	56	0.535714	yes
wash	Oniscus asellus	3	N2	L4	octanol	DMSO	4	31	35	-0.771429	yes
wash	Oniscus asellus	3	N2	L4	octanol	EtOH	11	23	34	-0.352941	yes
wash	Oniscus asellus	3	N2	L4	octanol	H2O	6	22	28	-0.571429	yes
wash	Oniscus asellus	3	N2	L4	wash	DMSO	44	35	79	0.113924	yes
wash	Oniscus asellus	3	N2	L4	wash	EtOH	20	15	35	0.142857	yes
wash	Oniscus asellus	3	N2	L4	wash	H2O	17	21	38	-0.105263	yes
wash	Oniscus asellus	4	MY2079	L4	isoamylalc	DMSO	39	20	59	0.322034	yes
wash	Oniscus asellus	4	MY2079	L4	isoamylalc	EtOH	46	14	60	0.533333	yes
wash	Oniscus asellus	4	MY2079	L4	isoamylalc	H2O	42	8	50	0.68	yes
wash	Oniscus asellus	4	MY2079	L4	octanol	DMSO	6	44	50	-0.76	yes
wash	Oniscus asellus	4	MY2079	L4	octanol	EtOH	5	44	49	-0.795918	yes
wash	Oniscus asellus	4	MY2079	L4	octanol	H2O	9	49	58	-0.689655	yes
wash	Oniscus asellus	4	MY2079	L4	wash	DMSO	16	28	44	-0.272727	yes
wash	Oniscus asellus	4	MY2079	L4	wash	EtOH	22	18	40	0.1	yes
wash	Oniscus asellus	4	MY2079	L4	wash	H2O	31	32	63	-0.015873	yes
wash	Oniscus asellus	4	N2	L4	isoamylalc	DMSO	33	2	35	0.885714	yes
wash	Oniscus asellus	4	N2	L4	isoamylalc	EtOH	45	7	52	0.730769	yes
wash	Oniscus asellus	4	N2	L4	isoamylalc	H2O	45	4	49	0.836735	yes
wash	Oniscus asellus	4	N2	L4	octanol	DMSO	8	29	37	-0.567568	yes
wash	Oniscus asellus	4	N2	L4	octanol	EtOH	2	19	21	-0.809524	yes
wash	Oniscus asellus	4	N2	L4	octanol	H2O	6	22	28	-0.571429	yes
wash	Oniscus asellus	4	N2	L4	wash	DMSO	7	19	26	-0.461538	yes
wash	Oniscus asellus	4	N2	L4	wash	EtOH	18	23	41	-0.121951	yes
wash	Oniscus asellus	4	N2	L4	wash	H2O	18	22	40	-0.1	yes
wash	Oniscus asellus	5	MY2079	L4	isoamylalc	DMSO	38	27	65	0.169231	yes
wash	Oniscus asellus	5	MY2079	L4	isoamylalc	EtOH	43	23	66	0.30303	yes
wash	Oniscus asellus	5	MY2079	L4	isoamylalc	H2O	66	25	91	0.450549	yes
wash	Oniscus asellus	5	MY2079	L4	octanol	DMSO	3	88	91	-0.934066	yes
wash	Oniscus asellus	5	MY2079	L4	octanol	EtOH	3	80	83	-0.927711	yes
wash	Oniscus asellus	5	MY2079	L4	octanol	H2O	2	71	73	-0.945205	yes
wash	Oniscus asellus	5	MY2079	L4	wash	DMSO	21	29	50	-0.16	yes
wash	Oniscus asellus	5	MY2079	L4	wash	EtOH	41	47	88	-0.0681818	yes
wash	Oniscus asellus	5	MY2079	L4	wash	H2O	27	36	63	-0.142857	yes
wash	Oniscus asellus	5	N2	L4	isoamylalc	DMSO	41	7	48	0.708333	yes
wash	Oniscus asellus	5	N2	L4	isoamylalc	EtOH	62	18	80	0.55	yes
wash	Oniscus asellus	5	N2	L4	isoamylalc	H2O	42	5	47	0.787234	yes
wash	Oniscus asellus	5	N2	L4	octanol	DMSO	3	31	34	-0.823529	yes
wash	Oniscus asellus	5	N2	L4	octanol	EtOH	7	33	40	-0.65	yes
wash	Oniscus asellus	5	N2	L4	octanol	H2O	2	29	31	-0.870968	yes
wash	Oniscus asellus	5	N2	L4	wash	DMSO	28	32	60	-0.0666667	yes
wash	Oniscus asellus	5	N2	L4	wash	EtOH	16	28	44	-0.272727	yes
wash	Oniscus asellus	5	N2	L4	wash	H2O	26	43	69	-0.246377	yes
wash	Oniscus asellus	6	MY2079	L4	isoamylalc	DMSO	74	28	102	0.45098	yes
wash	Oniscus asellus	6	MY2079	L4	isoamylalc	EtOH	108	42	150	0.44	yes
wash	Oniscus asellus	6	MY2079	L4	isoamylalc	H2O	67	35	102	0.313725	yes
wash	Oniscus asellus	6	MY2079	L4	octanol	DMSO	8	118	126	-0.873016	yes
wash	Oniscus asellus	6	MY2079	L4	octanol	EtOH	14	132	146	-0.808219	yes
wash	Oniscus asellus	6	MY2079	L4	octanol	H2O	8	84	92	-0.826087	yes
wash	Oniscus asellus	6	MY2079	L4	wash	DMSO	93	86	179	0.0391061	yes
wash	Oniscus asellus	6	MY2079	L4	wash	EtOH	37	44	81	-0.0864198	yes
wash	Oniscus asellus	6	MY2079	L4	wash	H2O	59	38	97	0.216495	yes
wash	Oniscus asellus	6	N2	L4	isoamylalc	DMSO	55	8	63	0.746032	yes
wash	Oniscus asellus	6	N2	L4	isoamylalc	EtOH	47	3	50	0.88	yes
wash	Oniscus asellus	6	N2	L4	isoamylalc	H2O	48	4	52	0.846154	yes
wash	Oniscus asellus	6	N2	L4	octanol	DMSO	5	48	53	-0.811321	yes
wash	Oniscus asellus	6	N2	L4	octanol	EtOH	0	5	5	NA	no	threshold not reached, exclude
wash	Oniscus asellus	6	N2	L4	octanol	H2O	3	4	7	NA	no	threshold not reached, exclude
wash	Oniscus asellus	6	N2	L4	wash	DMSO	56	51	107	0.046729	yes
wash	Oniscus asellus	6	N2	L4	wash	EtOH	36	45	81	-0.111111	yes
wash	Oniscus asellus	6	N2	L4	wash	H2O	32	48	80	-0.2	yes
wash	Oniscus asellus	7	MY2079	L4	isoamylalc	EtOH	40	16	56	0.428571	yes
wash	Oniscus asellus	7	MY2079	L4	isoamylalc	DMSO	63	27	90	0.4	yes
wash	Oniscus asellus	7	MY2079	L4	isoamylalc	H2O	46	10	56	0.642857	yes
wash	Oniscus asellus	7	MY2079	L4	octanol	EtOH	7	57	64	-0.78125	yes
wash	Oniscus asellus	7	MY2079	L4	octanol	DMSO	3	47	50	-0.88	yes
wash	Oniscus asellus	7	MY2079	L4	octanol	H2O	4	72	76	-0.894737	yes
wash	Oniscus asellus	7	MY2079	L4	wash	EtOH	50	48	98	0.0204082	yes
wash	Oniscus asellus	7	MY2079	L4	wash	DMSO	42	50	92	-0.0869565	yes
wash	Oniscus asellus	7	MY2079	L4	wash	H2O	32	36	68	-0.0588235	yes
wash	Oniscus asellus	7	N2	L4	isoamylalc	EtOH	45	1	46	0.956522	yes
wash	Oniscus asellus	7	N2	L4	isoamylalc	DMSO	48	5	53	0.811321	yes
wash	Oniscus asellus	7	N2	L4	isoamylalc	H2O	63	11	74	0.702703	yes
wash	Oniscus asellus	7	N2	L4	octanol	EtOH	2	66	68	-0.941176	yes
wash	Oniscus asellus	7	N2	L4	octanol	DMSO	7	62	69	-0.797101	yes
wash	Oniscus asellus	7	N2	L4	octanol	H2O	7	48	55	-0.745455	yes
wash	Oniscus asellus	7	N2	L4	wash	EtOH	25	24	49	0.0204082	yes
wash	Oniscus asellus	7	N2	L4	wash	DMSO	38	44	82	-0.0731707	yes
wash	Oniscus asellus	7	N2	L4	wash	H2O	23	30	53	-0.132075	yes
wash	Oniscus asellus	8	MY2079	L4	isoamylalc	H2O	43	11	54	0.592593	yes
wash	Oniscus asellus	8	MY2079	L4	isoamylalc	DMSO	46	18	64	0.4375	yes
wash	Oniscus asellus	8	MY2079	L4	isoamylalc	EtOH	41	17	58	0.413793	yes
wash	Oniscus asellus	8	MY2079	L4	octanol	H2O	8	31	39	-0.589744	yes
wash	Oniscus asellus	8	MY2079	L4	octanol	DMSO	10	36	46	-0.565217	yes
wash	Oniscus asellus	8	MY2079	L4	octanol	EtOH	9	22	31	-0.419355	yes
wash	Oniscus asellus	8	MY2079	L4	wash	H2O	21	31	52	-0.192308	yes
wash	Oniscus asellus	8	MY2079	L4	wash	DMSO	32	57	89	-0.280899	yes
wash	Oniscus asellus	8	MY2079	L4	wash	EtOH	25	26	51	-0.0196078	yes
wash	Oniscus asellus	8	N2	L4	isoamylalc	H2O	48	2	50	0.92	yes
wash	Oniscus asellus	8	N2	L4	isoamylalc	DMSO	37	8	45	0.644444	yes
wash	Oniscus asellus	8	N2	L4	isoamylalc	EtOH	30	10	40	0.5	yes
wash	Oniscus asellus	8	N2	L4	octanol	H2O	3	18	21	-0.714286	yes
wash	Oniscus asellus	8	N2	L4	octanol	DMSO	1	48	49	-0.959184	yes
wash	Oniscus asellus	8	N2	L4	octanol	EtOH	10	44	54	-0.62963	yes
wash	Oniscus asellus	8	N2	L4	wash	H2O	18	32	50	-0.28	yes
wash	Oniscus asellus	8	N2	L4	wash	DMSO	31	33	64	-0.03125	yes
wash	Oniscus asellus	8	N2	L4	wash	EtOH	18	24	42	-0.142857	yes
wash	Oniscus asellus	9	MY2079	L4	isoamylalc	EtOH	80	21	101	0.584158	yes
wash	Oniscus asellus	9	MY2079	L4	isoamylalc	H2O	78	29	107	0.457944	yes
wash	Oniscus asellus	9	MY2079	L4	isoamylalc	DMSO	76	15	91	0.67033	yes
wash	Oniscus asellus	9	MY2079	L4	octanol	EtOH	7	86	93	-0.849462	yes
wash	Oniscus asellus	9	MY2079	L4	octanol	H2O	8	54	62	-0.741935	yes
wash	Oniscus asellus	9	MY2079	L4	octanol	DMSO	21	66	87	-0.517241	yes
wash	Oniscus asellus	9	MY2079	L4	wash	EtOH	25	29	54	-0.0740741	yes
wash	Oniscus asellus	9	MY2079	L4	wash	H2O	63	68	131	-0.0381679	yes
wash	Oniscus asellus	9	MY2079	L4	wash	DMSO	48	49	97	-0.0103093	yes
wash	Oniscus asellus	9	N2	L4	isoamylalc	EtOH	137	10	147	0.863946	yes
wash	Oniscus asellus	9	N2	L4	isoamylalc	H2O	76	5	81	0.876543	yes
wash	Oniscus asellus	9	N2	L4	isoamylalc	DMSO	69	2	71	0.943662	yes
wash	Oniscus asellus	9	N2	L4	octanol	EtOH	7	89	96	-0.854167	yes
wash	Oniscus asellus	9	N2	L4	octanol	H2O	2	64	66	-0.939394	yes
wash	Oniscus asellus	9	N2	L4	octanol	DMSO	6	67	73	-0.835616	yes
wash	Oniscus asellus	9	N2	L4	wash	EtOH	40	43	83	-0.0361446	yes
wash	Oniscus asellus	9	N2	L4	wash	H2O	44	36	80	0.1	yes
wash	Oniscus asellus	9	N2	L4	wash	DMSO	40	31	71	0.126761	yes
wash	Oniscus asellus	10	MY2079	L4	isoamylalc	H2O	48	12	60	0.6	yes
wash	Oniscus asellus	10	MY2079	L4	isoamylalc	EtOH	90	26	116	0.551724	yes
wash	Oniscus asellus	10	MY2079	L4	isoamylalc	DMSO	73	15	88	0.659091	yes
wash	Oniscus asellus	10	MY2079	L4	octanol	H2O	6	55	61	-0.803279	yes
wash	Oniscus asellus	10	MY2079	L4	octanol	EtOH	5	55	60	-0.833333	yes
wash	Oniscus asellus	10	MY2079	L4	octanol	DMSO	12	77	89	-0.730337	yes
wash	Oniscus asellus	10	MY2079	L4	wash	H2O	26	26	52	0	yes
wash	Oniscus asellus	10	MY2079	L4	wash	EtOH	33	37	70	-0.0571429	yes
wash	Oniscus asellus	10	MY2079	L4	wash	DMSO	26	34	60	-0.133333	yes
wash	Oniscus asellus	10	N2	L4	isoamylalc	H2O	39	5	44	0.772727	yes
wash	Oniscus asellus	10	N2	L4	isoamylalc	EtOH	34	8	42	0.619048	yes
wash	Oniscus asellus	10	N2	L4	isoamylalc	DMSO	50	9	59	0.694915	yes
wash	Oniscus asellus	10	N2	L4	octanol	H2O	7	43	50	-0.72	yes
wash	Oniscus asellus	10	N2	L4	octanol	EtOH	6	47	53	-0.773585	yes
wash	Oniscus asellus	10	N2	L4	octanol	DMSO	2	49	51	-0.921569	yes
wash	Oniscus asellus	10	N2	L4	wash	H2O	23	26	49	-0.0612245	yes
wash	Oniscus asellus	10	N2	L4	wash	EtOH	24	20	44	0.0909091	yes
wash	Oniscus asellus	10	N2	L4	wash	DMSO	46	22	68	0.352941	yes

## Sheet: 1B O. asellus wash dauer
assay	invertebrate_species	rep	worm_strain	stage	choice_treat	solvent	count_treat	count_solvent	total	index	include	comments
wash	Oniscus asellus	1	MY2079	dauer	octanol	H2O	10	17	27	-0.259259	yes
wash	Oniscus asellus	1	MY2079	dauer	wash	EtOH	16	14	30	0.0666667	yes
wash	Oniscus asellus	1	MY2079	dauer	wash	H2O	16	14	30	0.0666667	yes
wash	Oniscus asellus	1	MY2079	dauer	isoamylalc	H2O	29	5	34	0.705882	yes
wash	Oniscus asellus	1	MY2079	dauer	octanol	DMSO	9	26	35	-0.485714	yes
wash	Oniscus asellus	1	MY2079	dauer	wash	DMSO	19	17	36	0.0555556	yes
wash	Oniscus asellus	1	MY2079	dauer	octanol	EtOH	7	32	39	-0.641026	yes
wash	Oniscus asellus	1	MY2079	dauer	isoamylalc	DMSO	39	8	47	0.659574	yes
wash	Oniscus asellus	1	MY2079	dauer	isoamylalc	EtOH	38	13	51	0.490196	yes
wash	Oniscus asellus	1	N2	dauer	wash	DMSO	7	4	11	0.272727	yes
wash	Oniscus asellus	1	N2	dauer	octanol	H2O	3	12	15	-0.6	yes
wash	Oniscus asellus	1	N2	dauer	isoamylalc	EtOH	9	8	17	0.0588235	yes
wash	Oniscus asellus	1	N2	dauer	isoamylalc	DMSO	14	4	18	0.555556	yes
wash	Oniscus asellus	1	N2	dauer	wash	H2O	8	10	18	-0.111111	yes
wash	Oniscus asellus	1	N2	dauer	wash	EtOH	15	7	22	0.363636	yes
wash	Oniscus asellus	1	N2	dauer	octanol	EtOH	6	17	23	-0.478261	yes
wash	Oniscus asellus	1	N2	dauer	octanol	DMSO	10	27	37	-0.459459	yes
wash	Oniscus asellus	1	N2	dauer	isoamylalc	H2O	36	11	47	0.531915	yes
wash	Oniscus asellus	2	MY2079	dauer	octanol	H2O	9	23	32	-0.4375	yes
wash	Oniscus asellus	2	MY2079	dauer	isoamylalc	EtOH	28	18	46	0.217391	yes
wash	Oniscus asellus	2	MY2079	dauer	octanol	DMSO	5	42	47	-0.787234	yes
wash	Oniscus asellus	2	MY2079	dauer	wash	EtOH	23	26	49	-0.0612245	yes
wash	Oniscus asellus	2	MY2079	dauer	isoamylalc	H2O	38	20	58	0.310345	yes
wash	Oniscus asellus	2	MY2079	dauer	wash	H2O	22	36	58	-0.241379	yes
wash	Oniscus asellus	2	MY2079	dauer	octanol	EtOH	23	40	63	-0.269841	yes
wash	Oniscus asellus	2	MY2079	dauer	wash	DMSO	15	60	75	-0.6	yes
wash	Oniscus asellus	2	MY2079	dauer	isoamylalc	DMSO	62	34	96	0.291667	yes
wash	Oniscus asellus	2	N2	dauer	octanol	H2O	2	0	2	NA	no	treshold not reached, exclude
wash	Oniscus asellus	2	N2	dauer	isoamylalc	DMSO	1	2	3	NA	no	treshold not reached, exclude
wash	Oniscus asellus	2	N2	dauer	octanol	EtOH	1	2	3	NA	no	treshold not reached, exclude
wash	Oniscus asellus	2	N2	dauer	isoamylalc	EtOH	2	2	4	NA	no	treshold not reached, exclude
wash	Oniscus asellus	2	N2	dauer	octanol	DMSO	4	0	4	NA	no	treshold not reached, exclude
wash	Oniscus asellus	2	N2	dauer	wash	EtOH	4	0	4	NA	no	treshold not reached, exclude
wash	Oniscus asellus	2	N2	dauer	wash	H2O	3	2	5	NA	no	treshold not reached, exclude
wash	Oniscus asellus	2	N2	dauer	isoamylalc	H2O	4	2	6	NA	no	treshold not reached, exclude
wash	Oniscus asellus	2	N2	dauer	wash	DMSO	4	3	7	NA	no	treshold not reached, exclude
wash	Oniscus asellus	3	MY2079	dauer	isoamylalc	H2O	45	9	54	0.666667	yes
wash	Oniscus asellus	3	MY2079	dauer	octanol	EtOH	22	36	58	-0.241379	yes
wash	Oniscus asellus	3	MY2079	dauer	octanol	H2O	27	32	59	-0.0847458	yes
wash	Oniscus asellus	3	MY2079	dauer	wash	EtOH	35	28	63	0.111111	yes
wash	Oniscus asellus	3	MY2079	dauer	octanol	DMSO	23	41	64	-0.28125	yes
wash	Oniscus asellus	3	MY2079	dauer	wash	DMSO	45	33	78	0.153846	yes
wash	Oniscus asellus	3	MY2079	dauer	isoamylalc	EtOH	70	11	81	0.728395	yes
wash	Oniscus asellus	3	MY2079	dauer	wash	H2O	43	45	88	-0.0227273	yes
wash	Oniscus asellus	3	MY2079	dauer	isoamylalc	DMSO	98	13	111	0.765766	yes
wash	Oniscus asellus	3	N2	dauer	octanol	DMSO	1	1	2	NA	no	treshold not reached, exclude
wash	Oniscus asellus	3	N2	dauer	octanol	EtOH	2	2	4	NA	no	treshold not reached, exclude
wash	Oniscus asellus	3	N2	dauer	wash	H2O	2	2	4	NA	no	treshold not reached, exclude
wash	Oniscus asellus	3	N2	dauer	wash	DMSO	3	2	5	NA	no	treshold not reached, exclude
wash	Oniscus asellus	3	N2	dauer	wash	EtOH	2	3	5	NA	no	treshold not reached, exclude
wash	Oniscus asellus	3	N2	dauer	octanol	H2O	3	3	6	NA	no	treshold not reached, exclude
wash	Oniscus asellus	3	N2	dauer	isoamylalc	EtOH	5	3	8	NA	no	treshold not reached, exclude
wash	Oniscus asellus	3	N2	dauer	isoamylalc	H2O	7	3	10	0.4	yes
wash	Oniscus asellus	3	N2	dauer	isoamylalc	DMSO	10	2	12	0.666667	yes
wash	Oniscus asellus	4	MY2079	dauer	octanol	EtOH	4	19	23	-0.652174	yes
wash	Oniscus asellus	4	MY2079	dauer	isoamylalc	DMSO	19	6	25	0.52	yes
wash	Oniscus asellus	4	MY2079	dauer	octanol	DMSO	11	18	29	-0.241379	yes
wash	Oniscus asellus	4	MY2079	dauer	isoamylalc	H2O	19	12	31	0.225806	yes
wash	Oniscus asellus	4	MY2079	dauer	isoamylalc	EtOH	30	7	37	0.621622	yes
wash	Oniscus asellus	4	MY2079	dauer	wash	EtOH	33	17	50	0.32	yes
wash	Oniscus asellus	4	MY2079	dauer	octanol	H2O	25	28	53	-0.0566038	yes
wash	Oniscus asellus	4	MY2079	dauer	wash	DMSO	35	26	61	0.147541	yes
wash	Oniscus asellus	4	MY2079	dauer	wash	H2O	36	33	69	0.0434783	yes
wash	Oniscus asellus	4	N2	dauer	octanol	H2O	0	0	0	NA	no	treshold not reached, exclude
wash	Oniscus asellus	4	N2	dauer	isoamylalc	DMSO	0	1	1	NA	no	treshold not reached, exclude
wash	Oniscus asellus	4	N2	dauer	isoamylalc	EtOH	2	0	2	NA	no	treshold not reached, exclude
wash	Oniscus asellus	4	N2	dauer	isoamylalc	H2O	2	0	2	NA	no	treshold not reached, exclude
wash	Oniscus asellus	4	N2	dauer	octanol	EtOH	1	2	3	NA	no	treshold not reached, exclude
wash	Oniscus asellus	4	N2	dauer	wash	H2O	2	1	3	NA	no	treshold not reached, exclude
wash	Oniscus asellus	4	N2	dauer	octanol	DMSO	2	2	4	NA	no	treshold not reached, exclude
wash	Oniscus asellus	4	N2	dauer	wash	DMSO	2	2	4	NA	no	treshold not reached, exclude
wash	Oniscus asellus	4	N2	dauer	wash	EtOH	3	2	5	NA	no	treshold not reached, exclude
wash	Oniscus asellus	5	MY2079	dauer	octanol	H2O	21	41	62	-0.322581	yes
wash	Oniscus asellus	5	MY2079	dauer	octanol	EtOH	39	48	87	-0.103448	yes
wash	Oniscus asellus	5	MY2079	dauer	isoamylalc	H2O	74	16	90	0.644444	yes
wash	Oniscus asellus	5	MY2079	dauer	wash	H2O	54	61	115	-0.0608696	yes
wash	Oniscus asellus	5	MY2079	dauer	wash	EtOH	70	46	116	0.206897	yes
wash	Oniscus asellus	5	MY2079	dauer	isoamylalc	DMSO	94	24	118	0.59322	yes
wash	Oniscus asellus	5	MY2079	dauer	octanol	DMSO	45	79	124	-0.274194	yes
wash	Oniscus asellus	5	MY2079	dauer	isoamylalc	EtOH	118	42	160	0.475	yes
wash	Oniscus asellus	5	MY2079	dauer	wash	DMSO	82	84	166	-0.0120482	yes
wash	Oniscus asellus	5	N2	dauer	octanol	EtOH	0	0	0	NA	no	treshold not reached, exclude
wash	Oniscus asellus	5	N2	dauer	wash	EtOH	2	0	2	NA	no	treshold not reached, exclude
wash	Oniscus asellus	5	N2	dauer	isoamylalc	DMSO	2	1	3	NA	no	treshold not reached, exclude
wash	Oniscus asellus	5	N2	dauer	octanol	H2O	0	3	3	NA	no	treshold not reached, exclude
wash	Oniscus asellus	5	N2	dauer	wash	DMSO	1	2	3	NA	no	treshold not reached, exclude
wash	Oniscus asellus	5	N2	dauer	isoamylalc	EtOH	1	3	4	NA	no	treshold not reached, exclude
wash	Oniscus asellus	5	N2	dauer	isoamylalc	H2O	4	1	5	NA	no	treshold not reached, exclude
wash	Oniscus asellus	5	N2	dauer	octanol	DMSO	3	2	5	NA	no	treshold not reached, exclude
wash	Oniscus asellus	5	N2	dauer	wash	H2O	4	3	7	NA	no	treshold not reached, exclude
wash	Oniscus asellus	6	MY2079	dauer	wash	EtOH	22	19	41	0.0731707	yes
wash	Oniscus asellus	6	MY2079	dauer	octanol	H2O	21	33	54	-0.222222	yes
wash	Oniscus asellus	6	MY2079	dauer	wash	H2O	28	31	59	-0.0508475	yes
wash	Oniscus asellus	6	MY2079	dauer	wash	DMSO	34	37	71	-0.0422535	yes
wash	Oniscus asellus	6	MY2079	dauer	isoamylalc	EtOH	60	14	74	0.621622	yes
wash	Oniscus asellus	6	MY2079	dauer	isoamylalc	H2O	65	10	75	0.733333	yes
wash	Oniscus asellus	6	MY2079	dauer	octanol	DMSO	33	49	82	-0.195122	yes
wash	Oniscus asellus	6	MY2079	dauer	isoamylalc	DMSO	71	16	87	0.632184	yes
wash	Oniscus asellus	6	MY2079	dauer	octanol	EtOH	49	70	119	-0.176471	yes
wash	Oniscus asellus	6	N2	dauer	octanol	H2O	2	3	5	NA	no	treshold not reached, exclude
wash	Oniscus asellus	6	N2	dauer	octanol	DMSO	3	4	7	NA	no	treshold not reached, exclude
wash	Oniscus asellus	6	N2	dauer	isoamylalc	DMSO	8	1	9	NA	no	treshold not reached, exclude
wash	Oniscus asellus	6	N2	dauer	isoamylalc	EtOH	8	2	10	0.6	yes
wash	Oniscus asellus	6	N2	dauer	isoamylalc	H2O	6	5	11	0.0909091	yes
wash	Oniscus asellus	6	N2	dauer	octanol	EtOH	3	9	12	-0.5	yes
wash	Oniscus asellus	6	N2	dauer	wash	DMSO	5	8	13	-0.230769	yes
wash	Oniscus asellus	6	N2	dauer	wash	H2O	6	7	13	-0.0769231	yes
wash	Oniscus asellus	6	N2	dauer	wash	EtOH	4	13	17	-0.529412	yes
wash	Oniscus asellus	7	MY2079	dauer	octanol	H2O	48	56	104	-0.0769231	yes
wash	Oniscus asellus	7	MY2079	dauer	octanol	EtOH	36	69	105	-0.314286	yes
wash	Oniscus asellus	7	MY2079	dauer	isoamylalc	EtOH	96	15	111	0.72973	yes
wash	Oniscus asellus	7	MY2079	dauer	wash	EtOH	61	55	116	0.0517241	yes
wash	Oniscus asellus	7	MY2079	dauer	isoamylalc	DMSO	100	22	122	0.639344	yes
wash	Oniscus asellus	7	MY2079	dauer	wash	H2O	58	67	125	-0.072	yes
wash	Oniscus asellus	7	MY2079	dauer	isoamylalc	H2O	103	28	131	0.572519	yes
wash	Oniscus asellus	7	MY2079	dauer	wash	DMSO	68	63	131	0.0381679	yes
wash	Oniscus asellus	7	MY2079	dauer	octanol	DMSO	68	78	146	-0.0684932	yes
wash	Oniscus asellus	7	N2	dauer	isoamylalc	H2O	7	7	14	0	yes
wash	Oniscus asellus	7	N2	dauer	wash	EtOH	12	8	20	0.2	yes
wash	Oniscus asellus	7	N2	dauer	isoamylalc	EtOH	13	10	23	0.130435	yes
wash	Oniscus asellus	7	N2	dauer	octanol	DMSO	10	14	24	-0.166667	yes
wash	Oniscus asellus	7	N2	dauer	isoamylalc	DMSO	15	11	26	0.153846	yes
wash	Oniscus asellus	7	N2	dauer	wash	H2O	14	14	28	0	yes
wash	Oniscus asellus	7	N2	dauer	wash	DMSO	14	17	31	-0.0967742	yes
wash	Oniscus asellus	7	N2	dauer	octanol	EtOH	19	16	35	0.0857143	yes
wash	Oniscus asellus	7	N2	dauer	octanol	H2O	9	32	41	-0.560976	yes
wash	Oniscus asellus	8	MY2079	dauer	octanol	H2O	33	64	97	-0.319588	yes
wash	Oniscus asellus	8	MY2079	dauer	isoamylalc	DMSO	99	20	119	0.663866	yes
wash	Oniscus asellus	8	MY2079	dauer	isoamylalc	H2O	108	18	126	0.714286	yes
wash	Oniscus asellus	8	MY2079	dauer	wash	H2O	48	79	127	-0.244094	yes
wash	Oniscus asellus	8	MY2079	dauer	wash	EtOH	54	75	129	-0.162791	yes
wash	Oniscus asellus	8	MY2079	dauer	wash	DMSO	56	83	139	-0.194245	yes
wash	Oniscus asellus	8	MY2079	dauer	octanol	DMSO	86	69	155	0.109677	yes
wash	Oniscus asellus	8	MY2079	dauer	isoamylalc	EtOH	137	25	162	0.691358	yes
wash	Oniscus asellus	8	MY2079	dauer	octanol	EtOH	74	100	174	-0.149425	yes
wash	Oniscus asellus	8	N2	dauer	isoamylalc	EtOH	20	9	29	0.37931	yes
wash	Oniscus asellus	8	N2	dauer	wash	DMSO	14	15	29	-0.0344828	yes
wash	Oniscus asellus	8	N2	dauer	isoamylalc	DMSO	29	9	38	0.526316	yes
wash	Oniscus asellus	8	N2	dauer	isoamylalc	H2O	27	12	39	0.384615	yes
wash	Oniscus asellus	8	N2	dauer	octanol	DMSO	14	27	41	-0.317073	yes
wash	Oniscus asellus	8	N2	dauer	octanol	EtOH	16	25	41	-0.219512	yes
wash	Oniscus asellus	8	N2	dauer	wash	EtOH	22	21	43	0.0232558	yes
wash	Oniscus asellus	8	N2	dauer	octanol	H2O	14	33	47	-0.404255	yes
wash	Oniscus asellus	8	N2	dauer	wash	H2O	23	25	48	-0.0416667	yes
wash	Oniscus asellus	9	MY2079	dauer	octanol	DMSO	56	76	132	-0.151515	yes
wash	Oniscus asellus	9	MY2079	dauer	wash	DMSO	61	91	152	-0.197368	yes
wash	Oniscus asellus	9	MY2079	dauer	octanol	H2O	85	131	216	-0.212963	yes
wash	Oniscus asellus	9	MY2079	dauer	octanol	EtOH	83	181	264	-0.371212	yes
wash	Oniscus asellus	9	MY2079	dauer	wash	H2O	134	170	304	-0.118421	yes
wash	Oniscus asellus	9	MY2079	dauer	isoamylalc	H2O	193	134	327	0.180428	yes
wash	Oniscus asellus	9	MY2079	dauer	isoamylalc	DMSO	190	156	346	0.0982659	yes
wash	Oniscus asellus	9	MY2079	dauer	isoamylalc	EtOH	265	136	401	0.321696	yes
wash	Oniscus asellus	9	MY2079	dauer	wash	EtOH	201	236	437	-0.0800915	yes
wash	Oniscus asellus	9	N2	dauer	isoamylalc	H2O	16	5	21	0.52381	yes
wash	Oniscus asellus	9	N2	dauer	octanol	H2O	14	13	27	0.037037	yes
wash	Oniscus asellus	9	N2	dauer	wash	H2O	12	25	37	-0.351351	yes
wash	Oniscus asellus	9	N2	dauer	wash	DMSO	23	33	56	-0.178571	yes
wash	Oniscus asellus	9	N2	dauer	octanol	EtOH	41	34	75	0.0933333	yes
wash	Oniscus asellus	9	N2	dauer	octanol	DMSO	45	37	82	0.097561	yes
wash	Oniscus asellus	9	N2	dauer	isoamylalc	DMSO	43	42	85	0.0117647	yes
wash	Oniscus asellus	9	N2	dauer	wash	EtOH	67	32	99	0.353535	yes
wash	Oniscus asellus	9	N2	dauer	isoamylalc	EtOH	76	88	164	-0.0731707	yes
wash	Oniscus asellus	10	MY2079	dauer	isoamylalc	EtOH	89	73	162	0.0987654	yes
wash	Oniscus asellus	10	MY2079	dauer	octanol	H2O	87	83	170	0.0235294	yes
wash	Oniscus asellus	10	MY2079	dauer	wash	EtOH	81	90	171	-0.0526316	yes
wash	Oniscus asellus	10	MY2079	dauer	wash	DMSO	103	115	218	-0.0550459	yes
wash	Oniscus asellus	10	MY2079	dauer	wash	H2O	129	130	259	-0.003861	yes
wash	Oniscus asellus	10	MY2079	dauer	octanol	DMSO	127	138	265	-0.0415094	yes
wash	Oniscus asellus	10	MY2079	dauer	isoamylalc	DMSO	139	141	280	-0.00714286	yes
wash	Oniscus asellus	10	MY2079	dauer	isoamylalc	H2O	152	159	311	-0.022508	yes
wash	Oniscus asellus	10	MY2079	dauer	octanol	EtOH	164	168	332	-0.0120482	yes
wash	Oniscus asellus	10	N2	dauer	wash	H2O	5	2	7	NA	no	treshold not reached, exclude
wash	Oniscus asellus	10	N2	dauer	isoamylalc	H2O	5	8	13	-0.230769	yes
wash	Oniscus asellus	10	N2	dauer	octanol	H2O	8	9	17	-0.0588235	yes
wash	Oniscus asellus	10	N2	dauer	isoamylalc	DMSO	17	4	21	0.619048	yes
wash	Oniscus asellus	10	N2	dauer	octanol	DMSO	10	11	21	-0.047619	yes
wash	Oniscus asellus	10	N2	dauer	octanol	EtOH	12	9	21	0.142857	yes
wash	Oniscus asellus	10	N2	dauer	wash	EtOH	14	8	22	0.272727	yes
wash	Oniscus asellus	10	N2	dauer	wash	DMSO	15	16	31	-0.0322581	yes
wash	Oniscus asellus	10	N2	dauer	isoamylalc	EtOH	22	11	33	0.333333	yes
wash	Oniscus asellus	11	MY2079	dauer	isoamylalc	H2O	52	54	106	-0.0188679	yes
wash	Oniscus asellus	11	MY2079	dauer	isoamylalc	EtOH	64	49	113	0.132743	yes
wash	Oniscus asellus	11	MY2079	dauer	octanol	DMSO	70	65	135	0.037037	yes
wash	Oniscus asellus	11	MY2079	dauer	octanol	EtOH	81	92	173	-0.0635838	yes
wash	Oniscus asellus	11	MY2079	dauer	isoamylalc	DMSO	112	62	174	0.287356	yes
wash	Oniscus asellus	11	MY2079	dauer	wash	DMSO	111	93	204	0.0882353	yes
wash	Oniscus asellus	11	MY2079	dauer	octanol	H2O	107	127	234	-0.0854701	yes
wash	Oniscus asellus	11	MY2079	dauer	wash	EtOH	120	127	247	-0.0283401	yes
wash	Oniscus asellus	11	MY2079	dauer	wash	H2O	127	122	249	0.0200803	yes
wash	Oniscus asellus	11	N2	dauer	octanol	DMSO	8	7	15	0.0666667	yes
wash	Oniscus asellus	11	N2	dauer	isoamylalc	DMSO	14	6	20	0.4	yes
wash	Oniscus asellus	11	N2	dauer	octanol	H2O	17	12	29	0.172414	yes
wash	Oniscus asellus	11	N2	dauer	wash	DMSO	14	15	29	-0.0344828	yes
wash	Oniscus asellus	11	N2	dauer	isoamylalc	H2O	19	18	37	0.027027	yes
wash	Oniscus asellus	11	N2	dauer	octanol	EtOH	24	16	40	0.2	yes
wash	Oniscus asellus	11	N2	dauer	isoamylalc	EtOH	27	14	41	0.317073	yes
wash	Oniscus asellus	11	N2	dauer	wash	EtOH	34	10	44	0.545455	yes
wash	Oniscus asellus	11	N2	dauer	wash	H2O	28	21	49	0.142857	yes
wash	Oniscus asellus	12	MY2079	dauer	isoamylalc	EtOH	96	56	56	0.263158	yes
wash	Oniscus asellus	12	MY2079	dauer	octanol	DMSO	31	43	74	-0.162162	yes
wash	Oniscus asellus	12	MY2079	dauer	isoamylalc	DMSO	69	42	111	0.243243	yes
wash	Oniscus asellus	12	MY2079	dauer	wash	EtOH	69	55	124	0.112903	yes
wash	Oniscus asellus	12	MY2079	dauer	octanol	H2O	49	76	125	-0.216	yes
wash	Oniscus asellus	12	MY2079	dauer	octanol	EtOH	51	92	143	-0.286713	yes
wash	Oniscus asellus	12	MY2079	dauer	wash	DMSO	76	70	146	0.0410959	yes
wash	Oniscus asellus	12	MY2079	dauer	wash	H2O	76	78	154	-0.012987	yes
wash	Oniscus asellus	12	MY2079	dauer	isoamylalc	H2O	87	72	159	0.0943396	yes
wash	Oniscus asellus	12	N2	dauer	wash	EtOH	8	3	11	0.454545	yes
wash	Oniscus asellus	12	N2	dauer	wash	H2O	6	6	12	0	yes
wash	Oniscus asellus	12	N2	dauer	wash	DMSO	7	7	14	0	yes
wash	Oniscus asellus	12	N2	dauer	octanol	H2O	9	11	20	-0.1	yes
wash	Oniscus asellus	12	N2	dauer	isoamylalc	DMSO	14	9	23	0.217391	yes
wash	Oniscus asellus	12	N2	dauer	isoamylalc	EtOH	16	11	27	0.185185	yes
wash	Oniscus asellus	12	N2	dauer	octanol	DMSO	16	11	27	0.185185	yes
wash	Oniscus asellus	12	N2	dauer	octanol	EtOH	11	16	27	-0.185185	yes
wash	Oniscus asellus	12	N2	dauer	isoamylalc	H2O	15	15	30	0	yes
wash	Oniscus asellus	13	MY2079	dauer	octanol	EtOH	17	52	69	-0.507246	yes
wash	Oniscus asellus	13	MY2079	dauer	wash	EtOH	43	36	79	0.0886076	yes
wash	Oniscus asellus	13	MY2079	dauer	octanol	H2O	23	62	85	-0.458824	yes
wash	Oniscus asellus	13	MY2079	dauer	isoamylalc	DMSO	70	24	94	0.489362	yes
wash	Oniscus asellus	13	MY2079	dauer	isoamylalc	H2O	63	35	98	0.285714	yes
wash	Oniscus asellus	13	MY2079	dauer	wash	H2O	48	51	99	-0.030303	yes
wash	Oniscus asellus	13	MY2079	dauer	octanol	DMSO	34	66	100	-0.32	yes
wash	Oniscus asellus	13	MY2079	dauer	wash	DMSO	56	54	110	0.0181818	yes
wash	Oniscus asellus	13	MY2079	dauer	isoamylalc	EtOH	78	33	111	0.405405	yes
wash	Oniscus asellus	13	N2	dauer	isoamylalc	H2O	7	4	11	0.272727	yes
wash	Oniscus asellus	13	N2	dauer	isoamylalc	DMSO	10	5	15	0.333333	yes
wash	Oniscus asellus	13	N2	dauer	wash	H2O	9	7	16	0.125	yes
wash	Oniscus asellus	13	N2	dauer	isoamylalc	EtOH	9	8	17	0.0588235	yes
wash	Oniscus asellus	13	N2	dauer	octanol	DMSO	8	10	18	-0.111111	yes
wash	Oniscus asellus	13	N2	dauer	octanol	EtOH	8	14	22	-0.272727	yes
wash	Oniscus asellus	13	N2	dauer	wash	EtOH	18	8	26	0.384615	yes
wash	Oniscus asellus	13	N2	dauer	wash	DMSO	13	14	27	-0.037037	yes
wash	Oniscus asellus	13	N2	dauer	octanol	H2O	13	23	36	-0.277778	yes
wash	Oniscus asellus	14	N2	dauer	wash	H2O	4	4	8	NA	no	treshold not reached, exclude
wash	Oniscus asellus	14	N2	dauer	isoamylalc	H2O	5	3	8	NA	no	treshold not reached, exclude
wash	Oniscus asellus	14	N2	dauer	octanol	H2O	13	15	28	-0.0714286	yes
wash	Oniscus asellus	14	N2	dauer	wash	DMSO	7	16	23	-0.391304	yes
wash	Oniscus asellus	14	N2	dauer	isoamylalc	DMSO	6	7	13	-0.0769231	yes
wash	Oniscus asellus	14	N2	dauer	octanol	DMSO	15	22	37	-0.189189	yes
wash	Oniscus asellus	14	N2	dauer	wash	EtOH	15	15	30	0	yes
wash	Oniscus asellus	14	N2	dauer	isoamylalc	EtOH	8	8	16	0	yes
wash	Oniscus asellus	14	N2	dauer	octanol	EtOH	5	7	12	-0.166667	yes
wash	Oniscus asellus	15	N2	dauer	wash	H2O	15	9	24	0.25	yes
wash	Oniscus asellus	15	N2	dauer	isoamylalc	H2O	5	7	12	-0.166667	yes
wash	Oniscus asellus	15	N2	dauer	octanol	H2O	10	19	29	-0.310345	yes
wash	Oniscus asellus	15	N2	dauer	wash	DMSO	23	18	41	0.121951	yes
wash	Oniscus asellus	15	N2	dauer	isoamylalc	DMSO	1	2	3	NA	no	treshold not reached, exclude
wash	Oniscus asellus	15	N2	dauer	octanol	DMSO	15	26	41	-0.268293	yes
wash	Oniscus asellus	15	N2	dauer	wash	EtOH	11	18	29	-0.241379	yes
wash	Oniscus asellus	15	N2	dauer	isoamylalc	EtOH	10	4	14	0.428571	yes
wash	Oniscus asellus	15	N2	dauer	octanol	EtOH	7	22	29	-0.517241	yes
wash	Oniscus asellus	16	MY2079	dauer	octanol	DMSO	50	90	140	-0.285714	yes
wash	Oniscus asellus	16	MY2079	dauer	wash	DMSO	53	56	109	-0.0275229	yes
wash	Oniscus asellus	16	MY2079	dauer	isoamylalc	DMSO	130	49	179	0.452514	yes
wash	Oniscus asellus	16	MY2079	dauer	octanol	H2O	83	105	188	-0.117021	yes
wash	Oniscus asellus	16	MY2079	dauer	wash	H2O	76	81	157	-0.0318471	yes
wash	Oniscus asellus	16	MY2079	dauer	isoamylalc	H2O	124	46	170	0.458824	yes
wash	Oniscus asellus	16	MY2079	dauer	octanol	EtOH	66	108	174	-0.241379	yes
wash	Oniscus asellus	16	MY2079	dauer	wash	EtOH	93	61	154	0.207792	yes
wash	Oniscus asellus	16	MY2079	dauer	isoamylalc	EtOH	100	45	145	0.37931	yes
wash	Oniscus asellus	16	N2	dauer	octanol	DMSO	17	22	39	-0.128205	yes
wash	Oniscus asellus	16	N2	dauer	wash	DMSO	14	7	21	0.333333	yes
wash	Oniscus asellus	16	N2	dauer	isoamylalc	DMSO	12	3	15	0.6	yes
wash	Oniscus asellus	16	N2	dauer	octanol	H2O	16	19	35	-0.0857143	yes
wash	Oniscus asellus	16	N2	dauer	wash	H2O	27	23	50	0.08	yes
wash	Oniscus asellus	16	N2	dauer	isoamylalc	H2O	27	7	34	0.588235	yes
wash	Oniscus asellus	16	N2	dauer	octanol	EtOH	10	12	22	-0.0909091	yes
wash	Oniscus asellus	16	N2	dauer	wash	EtOH	16	17	33	-0.030303	yes
wash	Oniscus asellus	16	N2	dauer	isoamylalc	EtOH	30	23	53	0.132075	yes
wash	Oniscus asellus	17	MY2079	dauer	octanol	DMSO	54	55	109	-0.00917431	yes
wash	Oniscus asellus	17	MY2079	dauer	wash	DMSO	79	77	156	0.0128205	yes
wash	Oniscus asellus	17	MY2079	dauer	isoamylalc	DMSO	153	50	203	0.507389	yes
wash	Oniscus asellus	17	MY2079	dauer	octanol	H2O	54	60	114	-0.0526316	yes
wash	Oniscus asellus	17	MY2079	dauer	wash	H2O	49	55	104	-0.0576923	yes
wash	Oniscus asellus	17	MY2079	dauer	isoamylalc	H2O	126	35	161	0.565217	yes
wash	Oniscus asellus	17	MY2079	dauer	octanol	EtOH	56	94	150	-0.253333	yes
wash	Oniscus asellus	17	MY2079	dauer	wash	EtOH	85	83	168	0.0119048	yes
wash	Oniscus asellus	17	MY2079	dauer	isoamylalc	EtOH	145	33	178	0.629213	yes
wash	Oniscus asellus	17	N2	dauer	octanol	DMSO	17	15	32	0.0625	yes
wash	Oniscus asellus	17	N2	dauer	wash	DMSO	5	6	11	-0.0909091	yes
wash	Oniscus asellus	17	N2	dauer	isoamylalc	DMSO	13	13	26	0	yes
wash	Oniscus asellus	17	N2	dauer	octanol	H2O	16	28	44	-0.272727	yes
wash	Oniscus asellus	17	N2	dauer	wash	H2O	8	4	12	0.333333	yes
wash	Oniscus asellus	17	N2	dauer	isoamylalc	H2O	20	7	27	0.481481	yes
wash	Oniscus asellus	17	N2	dauer	octanol	EtOH	16	24	40	-0.2	yes
wash	Oniscus asellus	17	N2	dauer	wash	EtOH	12	6	18	0.333333	yes
wash	Oniscus asellus	17	N2	dauer	isoamylalc	EtOH	40	10	50	0.6	yes

## Sheet: 1C P. scaber wash L4
assay	invertebrate_species	rep	worm_strain	stage	choice_treat	solvent	count_treat	count_solvent	total	index	include	comments
wash	Porcellio scaber	1	MY2079	L4	isoamylalc	DMSO	41	5	46	0.782609	yes
wash	Porcellio scaber	1	MY2079	L4	isoamylalc	EtOH	43	4	47	0.829787	yes
wash	Porcellio scaber	1	MY2079	L4	isoamylalc	H2O	58	8	66	0.757576	yes
wash	Porcellio scaber	1	MY2079	L4	octanol	DMSO	6	58	64	-0.8125	yes
wash	Porcellio scaber	1	MY2079	L4	octanol	EtOH	3	43	46	-0.869565	yes
wash	Porcellio scaber	1	MY2079	L4	octanol	H2O	6	56	62	-0.806452	yes
wash	Porcellio scaber	1	MY2079	L4	octanol	H2O	7	22	29	-0.517241	yes
wash	Porcellio scaber	1	MY2079	L4	wash	DMSO	27	33	60	-0.1	yes
wash	Porcellio scaber	1	MY2079	L4	wash	EtOH	33	32	65	0.0153846	yes
wash	Porcellio scaber	1	MY2079	L4	wash	H2O	20	26	46	-0.130435	yes
wash	Porcellio scaber	1	N2	L4	isoamylalc	DMSO	38	1	39	0.948718	yes
wash	Porcellio scaber	1	N2	L4	isoamylalc	EtOH	46	1	47	0.957447	yes
wash	Porcellio scaber	1	N2	L4	isoamylalc	H2O	23	2	25	0.84	yes
wash	Porcellio scaber	1	N2	L4	octanol	DMSO	6	24	30	-0.6	yes
wash	Porcellio scaber	1	N2	L4	octanol	EtOH	7	30	37	-0.621622	yes
wash	Porcellio scaber	1	N2	L4	octanol	H2O	1	22	23	-0.913043	yes
wash	Porcellio scaber	1	N2	L4	wash	DMSO	23	35	58	-0.206897	yes
wash	Porcellio scaber	1	N2	L4	wash	EtOH	16	20	36	-0.111111	yes
wash	Porcellio scaber	1	N2	L4	wash	H2O	18	17	35	0.0285714	yes
wash	Porcellio scaber	2	MY2079	L4	isoamylalc	DMSO	23	10	33	0.393939	yes
wash	Porcellio scaber	2	MY2079	L4	isoamylalc	EtOH	53	4	57	0.859649	yes
wash	Porcellio scaber	2	MY2079	L4	isoamylalc	H2O	62	13	75	0.653333	yes
wash	Porcellio scaber	2	MY2079	L4	octanol	DMSO	3	55	58	-0.896552	yes
wash	Porcellio scaber	2	MY2079	L4	octanol	EtOH	31	31	62	0	yes
wash	Porcellio scaber	2	MY2079	L4	octanol	H2O	5	53	58	-0.827586	yes
wash	Porcellio scaber	2	MY2079	L4	wash	DMSO	23	18	41	0.121951	yes
wash	Porcellio scaber	2	MY2079	L4	wash	EtOH	15	14	29	0.0344828	yes
wash	Porcellio scaber	2	MY2079	L4	wash	H2O	38	39	77	-0.012987	yes
wash	Porcellio scaber	2	N2	L4	isoamylalc	DMSO	91	0	91	1	yes
wash	Porcellio scaber	2	N2	L4	isoamylalc	EtOH	39	2	41	0.902439	yes
wash	Porcellio scaber	2	N2	L4	isoamylalc	H2O	35	1	36	0.944444	yes
wash	Porcellio scaber	2	N2	L4	octanol	DMSO	4	36	40	-0.8	yes
wash	Porcellio scaber	2	N2	L4	octanol	EtOH	12	15	27	-0.111111	yes
wash	Porcellio scaber	2	N2	L4	octanol	H2O	0	4	4	NA	no	threshold not reached, exclude
wash	Porcellio scaber	2	N2	L4	wash	DMSO	25	17	42	0.190476	yes
wash	Porcellio scaber	2	N2	L4	wash	EtOH	31	23	54	0.148148	yes
wash	Porcellio scaber	2	N2	L4	wash	H2O	24	16	40	0.2	yes
wash	Porcellio scaber	3	MY2079	L4	isoamylalc	DMSO	37	17	54	0.37037	yes
wash	Porcellio scaber	3	MY2079	L4	isoamylalc	EtOH	51	13	64	0.59375	yes
wash	Porcellio scaber	3	MY2079	L4	isoamylalc	H2O	33	10	43	0.534884	yes
wash	Porcellio scaber	3	MY2079	L4	octanol	DMSO	3	37	40	-0.85	yes
wash	Porcellio scaber	3	MY2079	L4	octanol	EtOH	3	45	48	-0.875	yes
wash	Porcellio scaber	3	MY2079	L4	octanol	H2O	2	35	37	-0.891892	yes
wash	Porcellio scaber	3	MY2079	L4	wash	DMSO	9	44	53	-0.660377	yes
wash	Porcellio scaber	3	MY2079	L4	wash	EtOH	19	50	69	-0.449275	yes
wash	Porcellio scaber	3	MY2079	L4	wash	H2O	20	28	48	-0.166667	yes
wash	Porcellio scaber	3	N2	L4	isoamylalc	DMSO	39	10	49	0.591837	yes
wash	Porcellio scaber	3	N2	L4	isoamylalc	EtOH	53	8	61	0.737705	yes
wash	Porcellio scaber	3	N2	L4	isoamylalc	H2O	58	4	62	0.870968	yes
wash	Porcellio scaber	3	N2	L4	octanol	DMSO	3	38	41	-0.853659	yes
wash	Porcellio scaber	3	N2	L4	octanol	EtOH	5	21	26	-0.615385	yes
wash	Porcellio scaber	3	N2	L4	octanol	H2O	4	43	47	-0.829787	yes
wash	Porcellio scaber	3	N2	L4	wash	DMSO	16	22	38	-0.157895	yes
wash	Porcellio scaber	3	N2	L4	wash	EtOH	17	36	53	-0.358491	yes
wash	Porcellio scaber	3	N2	L4	wash	H2O	38	22	60	0.266667	yes
wash	Porcellio scaber	4	MY2079	L4	isoamylalc	DMSO	37	10	47	0.574468	yes
wash	Porcellio scaber	4	MY2079	L4	isoamylalc	EtOH	38	11	49	0.55102	yes
wash	Porcellio scaber	4	MY2079	L4	isoamylalc	H2O	49	16	65	0.507692	yes
wash	Porcellio scaber	4	MY2079	L4	octanol	DMSO	4	39	43	-0.813953	yes
wash	Porcellio scaber	4	MY2079	L4	octanol	EtOH	3	32	35	-0.828571	yes
wash	Porcellio scaber	4	MY2079	L4	octanol	H2O	12	61	73	-0.671233	yes
wash	Porcellio scaber	4	MY2079	L4	wash	DMSO	16	20	36	-0.111111	yes
wash	Porcellio scaber	4	MY2079	L4	wash	EtOH	25	25	50	0	yes
wash	Porcellio scaber	4	MY2079	L4	wash	H2O	36	32	68	0.0588235	yes
wash	Porcellio scaber	4	N2	L4	isoamylalc	DMSO	26	2	28	0.857143	yes
wash	Porcellio scaber	4	N2	L4	isoamylalc	EtOH	70	1	71	0.971831	yes
wash	Porcellio scaber	4	N2	L4	isoamylalc	H2O	33	0	33	1	yes
wash	Porcellio scaber	4	N2	L4	octanol	DMSO	0	19	19	-1	yes
wash	Porcellio scaber	4	N2	L4	octanol	EtOH	4	21	25	-0.68	yes
wash	Porcellio scaber	4	N2	L4	octanol	H2O	5	22	27	-0.62963	yes
wash	Porcellio scaber	4	N2	L4	wash	DMSO	21	19	40	0.05	yes
wash	Porcellio scaber	4	N2	L4	wash	EtOH	17	17	34	0	yes
wash	Porcellio scaber	4	N2	L4	wash	H2O	18	17	35	0.0285714	yes
wash	Porcellio scaber	5	MY2079	L4	isoamylalc	DMSO	48	18	66	0.454545	yes
wash	Porcellio scaber	5	MY2079	L4	isoamylalc	EtOH	92	12	104	0.769231	yes
wash	Porcellio scaber	5	MY2079	L4	isoamylalc	H2O	51	16	67	0.522388	yes
wash	Porcellio scaber	5	MY2079	L4	octanol	DMSO	25	89	114	-0.561404	yes
wash	Porcellio scaber	5	MY2079	L4	octanol	EtOH	54	85	139	-0.223022	yes
wash	Porcellio scaber	5	MY2079	L4	octanol	H2O	27	57	84	-0.357143	yes
wash	Porcellio scaber	5	MY2079	L4	wash	DMSO	71	66	137	0.0364964	yes
wash	Porcellio scaber	5	MY2079	L4	wash	EtOH	53	91	144	-0.263889	yes
wash	Porcellio scaber	5	MY2079	L4	wash	H2O	45	40	85	0.0588235	yes
wash	Porcellio scaber	5	N2	L4	isoamylalc	DMSO	57	3	60	0.9	yes
wash	Porcellio scaber	5	N2	L4	isoamylalc	EtOH	101	9	110	0.836364	yes
wash	Porcellio scaber	5	N2	L4	isoamylalc	H2O	83	5	88	0.886364	yes
wash	Porcellio scaber	5	N2	L4	octanol	DMSO	16	16	32	0	yes
wash	Porcellio scaber	5	N2	L4	octanol	EtOH	6	54	60	-0.8	yes
wash	Porcellio scaber	5	N2	L4	octanol	H2O	5	35	40	-0.75	yes
wash	Porcellio scaber	5	N2	L4	wash	DMSO	43	60	103	-0.165049	yes
wash	Porcellio scaber	5	N2	L4	wash	EtOH	59	58	117	0.00854701	yes
wash	Porcellio scaber	5	N2	L4	wash	H2O	34	59	93	-0.268817	yes
wash	Porcellio scaber	6	MY2079	L4	isoamylalc	DMSO	25	12	37	0.351351	yes
wash	Porcellio scaber	6	MY2079	L4	isoamylalc	EtOH	36	10	46	0.565217	yes
wash	Porcellio scaber	6	MY2079	L4	isoamylalc	H2O	37	7	44	0.681818	yes
wash	Porcellio scaber	6	MY2079	L4	octanol	DMSO	2	52	54	-0.925926	yes
wash	Porcellio scaber	6	MY2079	L4	octanol	EtOH	10	66	76	-0.736842	yes
wash	Porcellio scaber	6	MY2079	L4	octanol	H2O	5	32	37	-0.72973	yes
wash	Porcellio scaber	6	MY2079	L4	wash	DMSO	30	27	57	0.0526316	yes
wash	Porcellio scaber	6	MY2079	L4	wash	EtOH	24	23	47	0.0212766	yes
wash	Porcellio scaber	6	MY2079	L4	wash	H2O	15	27	42	-0.285714	yes
wash	Porcellio scaber	6	N2	L4	isoamylalc	DMSO	14	4	18	0.555556	yes
wash	Porcellio scaber	6	N2	L4	isoamylalc	EtOH	15	5	20	0.5	yes
wash	Porcellio scaber	6	N2	L4	isoamylalc	H2O	19	4	23	0.652174	yes
wash	Porcellio scaber	6	N2	L4	octanol	DMSO	0	5	5	NA	no	threshold not reached, exclude
wash	Porcellio scaber	6	N2	L4	octanol	EtOH	3	18	21	-0.714286	yes
wash	Porcellio scaber	6	N2	L4	octanol	H2O	2	9	11	-0.636364	yes
wash	Porcellio scaber	6	N2	L4	wash	DMSO	17	9	26	0.307692	yes
wash	Porcellio scaber	6	N2	L4	wash	EtOH	18	10	28	0.285714	yes
wash	Porcellio scaber	6	N2	L4	wash	H2O	6	9	15	-0.2	yes
wash	Porcellio scaber	7	MY2079	L4	isoamylalc	DMSO	66	7	73	0.808219	yes
wash	Porcellio scaber	7	MY2079	L4	isoamylalc	EtOH	47	9	56	0.678571	yes
wash	Porcellio scaber	7	MY2079	L4	isoamylalc	H2O	47	6	53	0.773585	yes
wash	Porcellio scaber	7	MY2079	L4	octanol	DMSO	8	61	69	-0.768116	yes
wash	Porcellio scaber	7	MY2079	L4	octanol	EtOH	5	79	84	-0.880952	yes
wash	Porcellio scaber	7	MY2079	L4	octanol	H2O	17	54	71	-0.521127	yes
wash	Porcellio scaber	7	MY2079	L4	wash	DMSO	36	33	69	0.0434783	yes
wash	Porcellio scaber	7	MY2079	L4	wash	EtOH	29	25	54	0.0740741	yes
wash	Porcellio scaber	7	MY2079	L4	wash	H2O	35	29	64	0.09375	yes
wash	Porcellio scaber	7	N2	L4	isoamylalc	DMSO	42	4	46	0.826087	yes
wash	Porcellio scaber	7	N2	L4	isoamylalc	EtOH	48	4	52	0.846154	yes
wash	Porcellio scaber	7	N2	L4	isoamylalc	H2O	58	5	63	0.84127	yes
wash	Porcellio scaber	7	N2	L4	octanol	DMSO	8	41	49	-0.673469	yes
wash	Porcellio scaber	7	N2	L4	octanol	EtOH	6	43	49	-0.755102	yes
wash	Porcellio scaber	7	N2	L4	octanol	H2O	4	34	38	-0.789474	yes
wash	Porcellio scaber	7	N2	L4	wash	DMSO	22	18	40	0.1	yes
wash	Porcellio scaber	7	N2	L4	wash	EtOH	21	12	33	0.272727	yes
wash	Porcellio scaber	7	N2	L4	wash	H2O	34	23	57	0.192982	yes
wash	Porcellio scaber	8	MY2079	L4	isoamylalc	EtOH	56	29	85	0.317647	yes
wash	Porcellio scaber	8	MY2079	L4	isoamylalc	DMSO	53	6	59	0.79661	yes
wash	Porcellio scaber	8	MY2079	L4	isoamylalc	H2O	69	7	76	0.815789	yes
wash	Porcellio scaber	8	MY2079	L4	octanol	EtOH	10	34	44	-0.545455	yes
wash	Porcellio scaber	8	MY2079	L4	octanol	DMSO	10	44	54	-0.62963	yes
wash	Porcellio scaber	8	MY2079	L4	octanol	H2O	0	41	41	-1	yes
wash	Porcellio scaber	8	MY2079	L4	wash	EtOH	36	39	75	-0.04	yes
wash	Porcellio scaber	8	MY2079	L4	wash	DMSO	38	35	73	0.0410959	yes
wash	Porcellio scaber	8	MY2079	L4	wash	H2O	32	18	50	0.28	yes
wash	Porcellio scaber	8	N2	L4	isoamylalc	EtOH	27	6	33	0.636364	yes
wash	Porcellio scaber	8	N2	L4	isoamylalc	DMSO	54	2	56	0.928571	yes
wash	Porcellio scaber	8	N2	L4	isoamylalc	H2O	63	6	69	0.826087	yes
wash	Porcellio scaber	8	N2	L4	octanol	EtOH	8	42	50	-0.68	yes
wash	Porcellio scaber	8	N2	L4	octanol	DMSO	8	35	43	-0.627907	yes
wash	Porcellio scaber	8	N2	L4	octanol	H2O	4	36	40	-0.8	yes
wash	Porcellio scaber	8	N2	L4	wash	EtOH	28	31	59	-0.0508475	yes
wash	Porcellio scaber	8	N2	L4	wash	DMSO	40	40	80	0	yes
wash	Porcellio scaber	8	N2	L4	wash	H2O	32	31	63	0.015873	yes
wash	Porcellio scaber	9	MY2079	L4	isoamylalc	EtOH	76	11	87	0.747126	yes
wash	Porcellio scaber	9	MY2079	L4	isoamylalc	H2O	58	13	71	0.633803	yes
wash	Porcellio scaber	9	MY2079	L4	isoamylalc	DMSO	54	8	62	0.741935	yes
wash	Porcellio scaber	9	MY2079	L4	octanol	EtOH	5	59	64	-0.84375	yes
wash	Porcellio scaber	9	MY2079	L4	octanol	H2O	3	51	54	-0.888889	yes
wash	Porcellio scaber	9	MY2079	L4	octanol	DMSO	2	80	82	-0.95122	yes
wash	Porcellio scaber	9	MY2079	L4	wash	EtOH	54	30	84	0.285714	yes
wash	Porcellio scaber	9	MY2079	L4	wash	H2O	45	26	71	0.267606	yes
wash	Porcellio scaber	9	MY2079	L4	wash	DMSO	40	31	71	0.126761	yes
wash	Porcellio scaber	9	N2	L4	isoamylalc	EtOH	92	10	102	0.803922	yes
wash	Porcellio scaber	9	N2	L4	isoamylalc	H2O	61	1	62	0.967742	yes
wash	Porcellio scaber	9	N2	L4	isoamylalc	DMSO	70	1	71	0.971831	yes
wash	Porcellio scaber	9	N2	L4	octanol	EtOH	4	43	47	-0.829787	yes
wash	Porcellio scaber	9	N2	L4	octanol	H2O	10	65	75	-0.733333	yes
wash	Porcellio scaber	9	N2	L4	octanol	DMSO	1	55	56	-0.964286	yes
wash	Porcellio scaber	9	N2	L4	wash	EtOH	35	47	82	-0.146341	yes
wash	Porcellio scaber	9	N2	L4	wash	H2O	39	34	73	0.0684932	yes
wash	Porcellio scaber	9	N2	L4	wash	DMSO	34	37	71	-0.0422535	yes
wash	Porcellio scaber	10	MY2079	L4	isoamylalc	DMSO	73	31	104	0.403846	yes
wash	Porcellio scaber	10	MY2079	L4	isoamylalc	EtOH	71	27	98	0.44898	yes
wash	Porcellio scaber	10	MY2079	L4	isoamylalc	H2O	20	13	33	0.212121	yes
wash	Porcellio scaber	10	MY2079	L4	octanol	DMSO	4	43	47	-0.829787	yes
wash	Porcellio scaber	10	MY2079	L4	octanol	EtOH	18	71	89	-0.595506	yes
wash	Porcellio scaber	10	MY2079	L4	octanol	H2O	9	91	100	-0.82	yes
wash	Porcellio scaber	10	MY2079	L4	wash	DMSO	34	29	63	0.0793651	yes
wash	Porcellio scaber	10	MY2079	L4	wash	EtOH	33	57	90	-0.266667	yes
wash	Porcellio scaber	10	MY2079	L4	wash	H2O	39	49	88	-0.113636	yes
wash	Porcellio scaber	10	N2	L4	isoamylalc	DMSO	31	3	34	0.823529	yes
wash	Porcellio scaber	10	N2	L4	isoamylalc	EtOH	29	7	36	0.611111	yes
wash	Porcellio scaber	10	N2	L4	isoamylalc	H2O	35	5	40	0.75	yes
wash	Porcellio scaber	10	N2	L4	octanol	DMSO	1	14	15	-0.866667	yes
wash	Porcellio scaber	10	N2	L4	octanol	EtOH	4	23	27	-0.703704	yes
wash	Porcellio scaber	10	N2	L4	octanol	H2O	0	1	1	NA	no	threshold not reached, exclude
wash	Porcellio scaber	10	N2	L4	wash	DMSO	19	27	46	-0.173913	yes
wash	Porcellio scaber	10	N2	L4	wash	EtOH	15	20	35	-0.142857	yes
wash	Porcellio scaber	10	N2	L4	wash	H2O	20	22	42	-0.047619	yes

## Sheet: 1C P. scaber wash dauer
assay	invertebrate_species	rep	worm_strain	stage	choice_treat	solvent	count_treat	count_solvent	total	index	include	comments
wash	Porcellio scaber	1	MY2079	dauer	octanol	EtOH	0	19	19	-1	yes
wash	Porcellio scaber	1	MY2079	dauer	octanol	DMSO	5	18	23	-0.565217	yes
wash	Porcellio scaber	1	MY2079	dauer	wash	DMSO	16	11	27	0.185185	yes
wash	Porcellio scaber	1	MY2079	dauer	octanol	H2O	7	22	29	-0.517241	yes
wash	Porcellio scaber	1	MY2079	dauer	isoamylalc	DMSO	22	9	31	0.419355	yes
wash	Porcellio scaber	1	MY2079	dauer	wash	H2O	17	19	36	-0.0555556	yes
wash	Porcellio scaber	1	MY2079	dauer	wash	EtOH	22	15	37	0.189189	yes
wash	Porcellio scaber	1	MY2079	dauer	isoamylalc	H2O	34	8	42	0.619048	yes
wash	Porcellio scaber	1	MY2079	dauer	isoamylalc	EtOH	30	19	49	0.22449	yes
wash	Porcellio scaber	1	N2	dauer	octanol	DMSO	4	6	10	-0.2	yes
wash	Porcellio scaber	1	N2	dauer	isoamylalc	DMSO	10	1	11	0.818182	yes
wash	Porcellio scaber	1	N2	dauer	octanol	H2O	1	10	11	-0.818182	yes
wash	Porcellio scaber	1	N2	dauer	isoamylalc	EtOH	10	3	13	0.538462	yes
wash	Porcellio scaber	1	N2	dauer	octanol	EtOH	6	7	13	-0.0769231	yes
wash	Porcellio scaber	1	N2	dauer	wash	EtOH	8	7	15	0.0666667	yes
wash	Porcellio scaber	1	N2	dauer	wash	DMSO	7	9	16	-0.125	yes
wash	Porcellio scaber	1	N2	dauer	wash	H2O	8	9	17	-0.0588235	yes
wash	Porcellio scaber	1	N2	dauer	isoamylalc	H2O	10	10	20	0	yes
wash	Porcellio scaber	2	MY2079	dauer	octanol	EtOH	8	24	32	-0.5	yes
wash	Porcellio scaber	2	MY2079	dauer	octanol	H2O	13	25	38	-0.315789	yes
wash	Porcellio scaber	2	MY2079	dauer	wash	H2O	21	23	44	-0.0454545	yes
wash	Porcellio scaber	2	MY2079	dauer	octanol	DMSO	15	30	45	-0.333333	yes
wash	Porcellio scaber	2	MY2079	dauer	isoamylalc	H2O	41	7	48	0.708333	yes
wash	Porcellio scaber	2	MY2079	dauer	wash	EtOH	20	28	48	-0.166667	yes
wash	Porcellio scaber	2	MY2079	dauer	wash	DMSO	31	23	54	0.148148	yes
wash	Porcellio scaber	2	MY2079	dauer	isoamylalc	DMSO	51	16	67	0.522388	yes
wash	Porcellio scaber	2	MY2079	dauer	isoamylalc	EtOH	58	10	68	0.705882	yes
wash	Porcellio scaber	2	N2	dauer	wash	EtOH	1	1	2	NA	no	threshold not reached, exclude
wash	Porcellio scaber	2	N2	dauer	isoamylalc	DMSO	4	1	5	NA	no	threshold not reached, exclude
wash	Porcellio scaber	2	N2	dauer	octanol	DMSO	2	3	5	NA	no	threshold not reached, exclude
wash	Porcellio scaber	2	N2	dauer	isoamylalc	H2O	5	4	9	NA	no	threshold not reached, exclude
wash	Porcellio scaber	2	N2	dauer	octanol	EtOH	3	9	12	-0.5	yes
wash	Porcellio scaber	2	N2	dauer	octanol	H2O	2	10	12	-0.666667	yes
wash	Porcellio scaber	2	N2	dauer	isoamylalc	EtOH	8	5	13	0.230769	yes
wash	Porcellio scaber	2	N2	dauer	wash	H2O	7	6	13	0.0769231	yes
wash	Porcellio scaber	2	N2	dauer	wash	DMSO	7	13	20	-0.3	yes
wash	Porcellio scaber	4	MY2079	dauer	isoamylalc	H2O	39	10	49	0.591837	yes
wash	Porcellio scaber	4	MY2079	dauer	wash	DMSO	41	23	64	0.28125	yes
wash	Porcellio scaber	4	MY2079	dauer	wash	EtOH	33	40	73	-0.0958904	yes
wash	Porcellio scaber	4	MY2079	dauer	wash	H2O	51	27	78	0.307692	yes
wash	Porcellio scaber	4	MY2079	dauer	octanol	DMSO	40	44	84	-0.047619	yes
wash	Porcellio scaber	4	MY2079	dauer	isoamylalc	DMSO	85	15	100	0.7	yes
wash	Porcellio scaber	4	MY2079	dauer	octanol	EtOH	42	62	104	-0.192308	yes
wash	Porcellio scaber	4	MY2079	dauer	octanol	H2O	24	81	105	-0.542857	yes
wash	Porcellio scaber	4	MY2079	dauer	isoamylalc	EtOH	119	32	151	0.576159	yes
wash	Porcellio scaber	4	N2	dauer	wash	H2O	0	1	1	NA	no	threshold not reached, exclude
wash	Porcellio scaber	4	N2	dauer	isoamylalc	DMSO	1	2	3	NA	no	threshold not reached, exclude
wash	Porcellio scaber	4	N2	dauer	octanol	H2O	2	1	3	NA	no	threshold not reached, exclude
wash	Porcellio scaber	4	N2	dauer	wash	EtOH	1	2	3	NA	no	threshold not reached, exclude
wash	Porcellio scaber	4	N2	dauer	isoamylalc	EtOH	2	4	6	NA	no	threshold not reached, exclude
wash	Porcellio scaber	4	N2	dauer	isoamylalc	H2O	3	3	6	NA	no	threshold not reached, exclude
wash	Porcellio scaber	4	N2	dauer	wash	DMSO	3	3	6	NA	no	threshold not reached, exclude
wash	Porcellio scaber	4	N2	dauer	octanol	EtOH	3	4	7	NA	no	threshold not reached, exclude
wash	Porcellio scaber	4	N2	dauer	octanol	DMSO	4	12	16	-0.5	yes
wash	Porcellio scaber	5	MY2079	dauer	octanol	EtOH	1	39	40	-0.95	yes
wash	Porcellio scaber	5	MY2079	dauer	isoamylalc	DMSO	46	9	55	0.672727	yes
wash	Porcellio scaber	5	MY2079	dauer	octanol	H2O	25	34	59	-0.152542	yes
wash	Porcellio scaber	5	MY2079	dauer	isoamylalc	EtOH	64	8	72	0.777778	yes
wash	Porcellio scaber	5	MY2079	dauer	isoamylalc	H2O	63	11	74	0.702703	yes
wash	Porcellio scaber	5	MY2079	dauer	octanol	DMSO	18	67	85	-0.576471	yes
wash	Porcellio scaber	5	MY2079	dauer	wash	H2O	55	49	104	0.0576923	yes
wash	Porcellio scaber	5	MY2079	dauer	wash	EtOH	48	66	114	-0.157895	yes
wash	Porcellio scaber	5	MY2079	dauer	wash	DMSO	55	62	117	-0.0598291	yes
wash	Porcellio scaber	5	N2	dauer	wash	EtOH	9	5	14	0.285714	yes
wash	Porcellio scaber	5	N2	dauer	octanol	DMSO	9	10	19	-0.0526316	yes
wash	Porcellio scaber	5	N2	dauer	isoamylalc	H2O	14	6	20	0.4	yes
wash	Porcellio scaber	5	N2	dauer	isoamylalc	DMSO	18	7	25	0.44	yes
wash	Porcellio scaber	5	N2	dauer	isoamylalc	EtOH	22	4	26	0.692308	yes
wash	Porcellio scaber	5	N2	dauer	wash	DMSO	11	19	30	-0.266667	yes
wash	Porcellio scaber	5	N2	dauer	octanol	EtOH	12	19	31	-0.225806	yes
wash	Porcellio scaber	5	N2	dauer	octanol	H2O	9	25	34	-0.470588	yes
wash	Porcellio scaber	5	N2	dauer	wash	H2O	24	10	34	0.411765	yes
wash	Porcellio scaber	6	MY2079	dauer	wash	DMSO	80	100	180	-0.111111	yes
wash	Porcellio scaber	6	MY2079	dauer	octanol	H2O	96	104	200	-0.04	yes
wash	Porcellio scaber	6	MY2079	dauer	isoamylalc	H2O	176	27	203	0.73399	yes
wash	Porcellio scaber	6	MY2079	dauer	wash	H2O	108	110	218	-0.00917431	yes
wash	Porcellio scaber	6	MY2079	dauer	isoamylalc	EtOH	207	43	250	0.656	yes
wash	Porcellio scaber	6	MY2079	dauer	octanol	EtOH	140	121	261	0.0727969	yes
wash	Porcellio scaber	6	MY2079	dauer	octanol	DMSO	153	125	278	0.100719	yes
wash	Porcellio scaber	6	MY2079	dauer	wash	EtOH	158	157	315	0.0031746	yes
wash	Porcellio scaber	6	MY2079	dauer	isoamylalc	DMSO	317	44	361	0.756233	yes
wash	Porcellio scaber	6	N2	dauer	isoamylalc	EtOH	14	9	23	0.217391	yes
wash	Porcellio scaber	6	N2	dauer	isoamylalc	H2O	17	6	23	0.478261	yes
wash	Porcellio scaber	6	N2	dauer	wash	DMSO	24	13	37	0.297297	yes
wash	Porcellio scaber	6	N2	dauer	wash	H2O	20	20	40	0	yes
wash	Porcellio scaber	6	N2	dauer	isoamylalc	DMSO	25	19	44	0.136364	yes
wash	Porcellio scaber	6	N2	dauer	wash	EtOH	25	23	48	0.0416667	yes
wash	Porcellio scaber	6	N2	dauer	octanol	DMSO	25	32	57	-0.122807	yes
wash	Porcellio scaber	6	N2	dauer	octanol	H2O	26	34	60	-0.133333	yes
wash	Porcellio scaber	6	N2	dauer	octanol	EtOH	24	39	63	-0.238095	yes
wash	Porcellio scaber	7	MY2079	dauer	octanol	EtOH	38	90	128	-0.40625	yes
wash	Porcellio scaber	7	MY2079	dauer	octanol	DMSO	52	94	146	-0.287671	yes
wash	Porcellio scaber	7	MY2079	dauer	wash	DMSO	70	91	161	-0.130435	yes
wash	Porcellio scaber	7	MY2079	dauer	wash	EtOH	81	116	197	-0.177665	yes
wash	Porcellio scaber	7	MY2079	dauer	octanol	H2O	83	138	221	-0.248869	yes
wash	Porcellio scaber	7	MY2079	dauer	isoamylalc	EtOH	145	112	257	0.128405	yes
wash	Porcellio scaber	7	MY2079	dauer	wash	H2O	129	144	273	-0.0549451	yes
wash	Porcellio scaber	7	MY2079	dauer	isoamylalc	DMSO	146	139	285	0.0245614	yes
wash	Porcellio scaber	7	MY2079	dauer	isoamylalc	H2O	133	152	285	-0.0666667	yes
wash	Porcellio scaber	7	N2	dauer	isoamylalc	DMSO	4	2	6	NA	no	threshold not reached, exclude
wash	Porcellio scaber	7	N2	dauer	wash	EtOH	5	4	9	NA	no	threshold not reached, exclude
wash	Porcellio scaber	7	N2	dauer	wash	H2O	1	10	11	-0.818182	yes
wash	Porcellio scaber	7	N2	dauer	isoamylalc	EtOH	8	8	16	0	yes
wash	Porcellio scaber	7	N2	dauer	isoamylalc	H2O	7	9	16	-0.125	yes
wash	Porcellio scaber	7	N2	dauer	octanol	H2O	8	9	17	-0.0588235	yes
wash	Porcellio scaber	7	N2	dauer	wash	DMSO	9	9	18	0	yes
wash	Porcellio scaber	7	N2	dauer	octanol	EtOH	12	14	26	-0.0769231	yes
wash	Porcellio scaber	7	N2	dauer	octanol	DMSO	23	18	41	0.121951	yes
wash	Porcellio scaber	8	MY2079	dauer	isoamylalc	H2O	59	53	112	0.0535714	yes
wash	Porcellio scaber	8	MY2079	dauer	isoamylalc	EtOH	85	83	168	0.0119048	yes
wash	Porcellio scaber	8	MY2079	dauer	wash	EtOH	132	44	176	0.5	yes
wash	Porcellio scaber	8	MY2079	dauer	wash	DMSO	125	59	184	0.358696	yes
wash	Porcellio scaber	8	MY2079	dauer	wash	H2O	158	34	192	0.645833	yes
wash	Porcellio scaber	8	MY2079	dauer	octanol	EtOH	53	141	194	-0.453608	yes
wash	Porcellio scaber	8	MY2079	dauer	isoamylalc	DMSO	122	80	202	0.207921	yes
wash	Porcellio scaber	8	MY2079	dauer	octanol	DMSO	54	177	231	-0.532468	yes
wash	Porcellio scaber	8	MY2079	dauer	octanol	H2O	91	174	265	-0.313208	yes
wash	Porcellio scaber	8	N2	dauer	isoamylalc	DMSO	8	10	18	-0.111111	yes
wash	Porcellio scaber	8	N2	dauer	octanol	H2O	9	12	21	-0.142857	yes
wash	Porcellio scaber	8	N2	dauer	isoamylalc	EtOH	12	10	22	0.0909091	yes
wash	Porcellio scaber	8	N2	dauer	isoamylalc	H2O	18	12	30	0.2	yes
wash	Porcellio scaber	8	N2	dauer	octanol	EtOH	14	18	32	-0.125	yes
wash	Porcellio scaber	8	N2	dauer	octanol	DMSO	15	28	43	-0.302326	yes
wash	Porcellio scaber	8	N2	dauer	wash	H2O	31	25	56	0.107143	yes
wash	Porcellio scaber	8	N2	dauer	wash	DMSO	40	30	70	0.142857	yes
wash	Porcellio scaber	8	N2	dauer	wash	EtOH	47	27	74	0.27027	yes
wash	Porcellio scaber	9	MY2079	dauer	wash	EtOH	33	61	94	-0.297872	yes
wash	Porcellio scaber	9	MY2079	dauer	octanol	H2O	35	66	101	-0.306931	yes
wash	Porcellio scaber	9	MY2079	dauer	isoamylalc	EtOH	71	46	117	0.213675	yes
wash	Porcellio scaber	9	MY2079	dauer	wash	DMSO	63	55	118	0.0677966	yes
wash	Porcellio scaber	9	MY2079	dauer	octanol	DMSO	63	56	119	0.0588235	yes
wash	Porcellio scaber	9	MY2079	dauer	isoamylalc	DMSO	82	48	130	0.261538	yes
wash	Porcellio scaber	9	MY2079	dauer	wash	H2O	52	86	138	-0.246377	yes
wash	Porcellio scaber	9	MY2079	dauer	octanol	EtOH	54	104	158	-0.316456	yes
wash	Porcellio scaber	9	MY2079	dauer	isoamylalc	H2O	105	54	159	0.320755	yes
wash	Porcellio scaber	9	N2	dauer	wash	EtOH	5	8	13	-0.230769	yes
wash	Porcellio scaber	9	N2	dauer	octanol	EtOH	5	11	16	-0.375	yes
wash	Porcellio scaber	9	N2	dauer	isoamylalc	DMSO	12	13	25	-0.04	yes
wash	Porcellio scaber	9	N2	dauer	wash	H2O	11	14	25	-0.12	yes
wash	Porcellio scaber	9	N2	dauer	isoamylalc	EtOH	15	12	27	0.111111	yes
wash	Porcellio scaber	9	N2	dauer	isoamylalc	H2O	17	12	29	0.172414	yes
wash	Porcellio scaber	9	N2	dauer	octanol	DMSO	16	16	32	0	yes
wash	Porcellio scaber	9	N2	dauer	octanol	H2O	19	18	37	0.027027	yes
wash	Porcellio scaber	9	N2	dauer	wash	DMSO	19	23	42	-0.0952381	yes
wash	Porcellio scaber	11	MY2079	dauer	isoamylalc	H2O	38	35	73	0.0410959	yes
wash	Porcellio scaber	11	MY2079	dauer	octanol	DMSO	32	43	75	-0.146667	yes
wash	Porcellio scaber	11	MY2079	dauer	octanol	H2O	22	59	81	-0.45679	yes
wash	Porcellio scaber	11	MY2079	dauer	isoamylalc	DMSO	52	36	88	0.181818	yes
wash	Porcellio scaber	11	MY2079	dauer	wash	H2O	41	52	93	-0.11828	yes
wash	Porcellio scaber	11	MY2079	dauer	isoamylalc	EtOH	61	33	94	0.297872	yes
wash	Porcellio scaber	11	MY2079	dauer	wash	EtOH	44	54	98	-0.102041	yes
wash	Porcellio scaber	11	MY2079	dauer	octanol	EtOH	36	67	103	-0.300971	yes
wash	Porcellio scaber	11	MY2079	dauer	wash	DMSO	48	63	111	-0.135135	yes
wash	Porcellio scaber	11	N2	dauer	wash	H2O	2	4	6	NA	no	threshold not reached, exclude
wash	Porcellio scaber	11	N2	dauer	isoamylalc	DMSO	5	5	10	0	yes
wash	Porcellio scaber	11	N2	dauer	wash	DMSO	4	6	10	-0.2	yes
wash	Porcellio scaber	11	N2	dauer	isoamylalc	H2O	7	4	11	0.272727	yes
wash	Porcellio scaber	11	N2	dauer	wash	EtOH	6	5	11	0.0909091	yes
wash	Porcellio scaber	11	N2	dauer	isoamylalc	EtOH	6	10	16	-0.25	yes
wash	Porcellio scaber	11	N2	dauer	octanol	DMSO	12	12	24	0	yes
wash	Porcellio scaber	11	N2	dauer	octanol	H2O	15	13	28	0.0714286	yes
wash	Porcellio scaber	11	N2	dauer	octanol	EtOH	12	24	36	-0.333333	yes
wash	Porcellio scaber	12	MY2079	dauer	octanol	DMSO	16	35	51	-0.372549	yes
wash	Porcellio scaber	12	MY2079	dauer	isoamylalc	EtOH	40	19	59	0.355932	yes
wash	Porcellio scaber	12	MY2079	dauer	octanol	H2O	27	50	77	-0.298701	yes
wash	Porcellio scaber	12	MY2079	dauer	octanol	EtOH	31	48	79	-0.21519	yes
wash	Porcellio scaber	12	MY2079	dauer	wash	EtOH	35	45	80	-0.125	yes
wash	Porcellio scaber	12	MY2079	dauer	wash	H2O	49	59	108	-0.0925926	yes
wash	Porcellio scaber	12	MY2079	dauer	isoamylalc	DMSO	87	31	118	0.474576	yes
wash	Porcellio scaber	12	MY2079	dauer	isoamylalc	H2O	87	37	124	0.403226	yes
wash	Porcellio scaber	12	MY2079	dauer	wash	DMSO	73	85	158	-0.0759494	yes
wash	Porcellio scaber	12	N2	dauer	wash	EtOH	3	3	6	NA	no	threshold not reached, exclude
wash	Porcellio scaber	12	N2	dauer	wash	DMSO	6	2	8	NA	no	threshold not reached, exclude
wash	Porcellio scaber	12	N2	dauer	wash	H2O	6	7	13	-0.0769231	yes
wash	Porcellio scaber	12	N2	dauer	isoamylalc	H2O	13	6	19	0.368421	yes
wash	Porcellio scaber	12	N2	dauer	octanol	H2O	9	12	21	-0.142857	yes
wash	Porcellio scaber	12	N2	dauer	octanol	DMSO	10	16	26	-0.230769	yes
wash	Porcellio scaber	12	N2	dauer	octanol	EtOH	11	17	28	-0.214286	yes
wash	Porcellio scaber	12	N2	dauer	isoamylalc	EtOH	16	14	30	0.0666667	yes
wash	Porcellio scaber	12	N2	dauer	isoamylalc	DMSO	24	12	36	0.333333	yes
wash	Porcellio scaber	13	N2	dauer	wash	H2O	5	8	13	-0.230769	yes
wash	Porcellio scaber	13	N2	dauer	isoamylalc	H2O	9	5	14	0.285714	yes
wash	Porcellio scaber	13	N2	dauer	octanol	H2O	21	19	40	0.05	yes
wash	Porcellio scaber	13	N2	dauer	wash	DMSO	1	11	12	-0.833333	yes
wash	Porcellio scaber	13	N2	dauer	isoamylalc	DMSO	33	21	54	0.222222	yes
wash	Porcellio scaber	13	N2	dauer	octanol	DMSO	25	18	43	0.162791	yes
wash	Porcellio scaber	13	N2	dauer	wash	EtOH	18	11	29	0.241379	yes
wash	Porcellio scaber	13	N2	dauer	isoamylalc	EtOH	20	10	30	0.333333	yes
wash	Porcellio scaber	13	N2	dauer	octanol	EtOH	24	30	54	-0.111111	yes
wash	Porcellio scaber	14	N2	dauer	wash	H2O	11	8	19	0.157895	yes
wash	Porcellio scaber	14	N2	dauer	isoamylalc	H2O	17	4	21	0.619048	yes
wash	Porcellio scaber	14	N2	dauer	octanol	H2O	8	13	21	-0.238095	yes
wash	Porcellio scaber	14	N2	dauer	wash	DMSO	14	12	26	0.0769231	yes
wash	Porcellio scaber	14	N2	dauer	isoamylalc	DMSO	20	9	29	0.37931	yes
wash	Porcellio scaber	14	N2	dauer	octanol	DMSO	6	8	14	-0.142857	yes
wash	Porcellio scaber	14	N2	dauer	wash	EtOH	15	6	21	0.428571	yes
wash	Porcellio scaber	14	N2	dauer	isoamylalc	EtOH	19	4	23	0.652174	yes
wash	Porcellio scaber	14	N2	dauer	octanol	EtOH	5	6	11	-0.0909091	yes
wash	Porcellio scaber	15	MY2079	dauer	octanol	DMSO	42	70	112	-0.25	yes
wash	Porcellio scaber	15	MY2079	dauer	wash	DMSO	69	67	136	0.0147059	yes
wash	Porcellio scaber	15	MY2079	dauer	isoamylalc	DMSO	127	20	147	0.727891	yes
wash	Porcellio scaber	15	MY2079	dauer	octanol	H2O	68	84	152	-0.105263	yes
wash	Porcellio scaber	15	MY2079	dauer	wash	H2O	96	96	192	0	yes
wash	Porcellio scaber	15	MY2079	dauer	isoamylalc	H2O	133	36	169	0.573964	yes
wash	Porcellio scaber	15	MY2079	dauer	octanol	EtOH	30	62	92	-0.347826	yes
wash	Porcellio scaber	15	MY2079	dauer	wash	EtOH	63	60	123	0.0243902	yes
wash	Porcellio scaber	15	MY2079	dauer	isoamylalc	EtOH	123	46	169	0.455621	yes
wash	Porcellio scaber	15	N2	dauer	octanol	DMSO	17	14	31	0.0967742	yes
wash	Porcellio scaber	15	N2	dauer	wash	DMSO	7	5	12	0.166667	yes
wash	Porcellio scaber	15	N2	dauer	isoamylalc	DMSO	10	8	18	0.111111	yes
wash	Porcellio scaber	15	N2	dauer	octanol	H2O	35	21	56	0.25	yes
wash	Porcellio scaber	15	N2	dauer	wash	H2O	8	10	18	-0.111111	yes
wash	Porcellio scaber	15	N2	dauer	isoamylalc	H2O	13	3	16	0.625	yes
wash	Porcellio scaber	15	N2	dauer	octanol	EtOH	40	44	84	-0.047619	yes
wash	Porcellio scaber	15	N2	dauer	wash	EtOH	14	12	26	0.0769231	yes
wash	Porcellio scaber	15	N2	dauer	isoamylalc	EtOH	9	7	16	0.125	yes
wash	Porcellio scaber	16	MY2079	dauer	octanol	DMSO	61	79	140	-0.128571	yes
wash	Porcellio scaber	16	MY2079	dauer	wash	DMSO	74	96	170	-0.129412	yes
wash	Porcellio scaber	16	MY2079	dauer	isoamylalc	DMSO	108	35	143	0.51049	yes
wash	Porcellio scaber	16	MY2079	dauer	octanol	H2O	39	83	122	-0.360656	yes
wash	Porcellio scaber	16	MY2079	dauer	wash	H2O	57	54	111	0.027027	yes
wash	Porcellio scaber	16	MY2079	dauer	isoamylalc	H2O	88	31	119	0.478992	yes
wash	Porcellio scaber	16	MY2079	dauer	octanol	EtOH	50	82	132	-0.242424	yes
wash	Porcellio scaber	16	MY2079	dauer	wash	EtOH	58	64	122	-0.0491803	yes
wash	Porcellio scaber	16	MY2079	dauer	isoamylalc	EtOH	106	43	149	0.422819	yes
wash	Porcellio scaber	16	N2	dauer	octanol	DMSO	10	35	45	-0.555556	yes
wash	Porcellio scaber	16	N2	dauer	wash	DMSO	9	15	24	-0.25	yes
wash	Porcellio scaber	16	N2	dauer	isoamylalc	DMSO	27	19	46	0.173913	yes
wash	Porcellio scaber	16	N2	dauer	octanol	H2O	29	37	66	-0.121212	yes
wash	Porcellio scaber	16	N2	dauer	wash	H2O	28	25	53	0.0566038	yes
wash	Porcellio scaber	16	N2	dauer	isoamylalc	H2O	8	17	25	-0.36	yes
wash	Porcellio scaber	16	N2	dauer	octanol	EtOH	39	42	81	-0.037037	yes
wash	Porcellio scaber	16	N2	dauer	wash	EtOH	3	14	17	-0.647059	yes
wash	Porcellio scaber	16	N2	dauer	isoamylalc	EtOH	16	19	35	-0.0857143	yes

## Sheet: 1D Armadillidium wash L4
assay	invertebrate_species	rep	worm_strain	stage	choice_treat	solvent	count_treat	count_solvent	total	index	include	comments
wash	Armadillidium sp.	1	MY2079	L4	isoamylalc	DMSO	19	12	31	0.225806	yes
wash	Armadillidium sp.	1	MY2079	L4	isoamylalc	H2O	26	15	41	0.268293	yes
wash	Armadillidium sp.	1	MY2079	L4	isoamylalc	EtOH	42	13	55	0.527273	yes
wash	Armadillidium sp.	1	MY2079	L4	octanol	DMSO	3	25	28	-0.785714	yes
wash	Armadillidium sp.	1	MY2079	L4	octanol	H2O	3	25	28	-0.785714	yes
wash	Armadillidium sp.	1	MY2079	L4	octanol	EtOH	8	30	38	-0.578947	yes
wash	Armadillidium sp.	1	MY2079	L4	wash	DMSO	6	6	12	0	yes
wash	Armadillidium sp.	1	MY2079	L4	wash	H2O	18	20	38	-0.0526316	yes
wash	Armadillidium sp.	1	MY2079	L4	wash	EtOH	9	12	21	-0.142857	yes
wash	Armadillidium sp.	1	N2	L4	isoamylalc	DMSO	13	2	15	0.733333	yes
wash	Armadillidium sp.	1	N2	L4	isoamylalc	H2O	16	1	17	0.882353	yes
wash	Armadillidium sp.	1	N2	L4	isoamylalc	EtOH	11	1	12	0.833333	yes
wash	Armadillidium sp.	1	N2	L4	octanol	DMSO	4	13	17	-0.529412	yes
wash	Armadillidium sp.	1	N2	L4	octanol	H2O	4	14	18	-0.555556	yes
wash	Armadillidium sp.	1	N2	L4	octanol	EtOH	1	9	10	-0.8	yes
wash	Armadillidium sp.	1	N2	L4	wash	DMSO	4	17	21	-0.619048	yes
wash	Armadillidium sp.	1	N2	L4	wash	H2O	7	10	17	-0.176471	yes
wash	Armadillidium sp.	1	N2	L4	wash	EtOH	6	5	11	0.0909091	yes
wash	Armadillidium sp.	2	MY2079	L4	isoamylalc	DMSO	26	5	31	0.677419	yes
wash	Armadillidium sp.	2	MY2079	L4	isoamylalc	H2O	33	16	49	0.346939	yes
wash	Armadillidium sp.	2	MY2079	L4	isoamylalc	EtOH	29	4	33	0.757576	yes
wash	Armadillidium sp.	2	MY2079	L4	octanol	DMSO	2	14	16	-0.75	yes
wash	Armadillidium sp.	2	MY2079	L4	octanol	H2O	5	21	26	-0.615385	yes
wash	Armadillidium sp.	2	MY2079	L4	octanol	EtOH	4	15	19	-0.578947	yes
wash	Armadillidium sp.	2	MY2079	L4	wash	DMSO	17	31	48	-0.291667	yes
wash	Armadillidium sp.	2	MY2079	L4	wash	H2O	8	10	18	-0.111111	yes
wash	Armadillidium sp.	2	MY2079	L4	wash	EtOH	23	19	42	0.0952381	yes
wash	Armadillidium sp.	2	N2	L4	isoamylalc	DMSO	10	3	13	NA	no	most worms stayed in the middle, exclude
wash	Armadillidium sp.	2	N2	L4	isoamylalc	H2O	7	2	9	NA	no	most worms stayed in the middle, exclude
wash	Armadillidium sp.	2	N2	L4	isoamylalc	EtOH	18	0	18	NA	no	most worms stayed in the middle, exclude
wash	Armadillidium sp.	2	N2	L4	octanol	DMSO	1	17	18	NA	no	most worms stayed in the middle, exclude
wash	Armadillidium sp.	2	N2	L4	octanol	H2O	2	7	9	NA	no	most worms stayed in the middle, exclude
wash	Armadillidium sp.	2	N2	L4	octanol	EtOH	2	7	9	NA	no	most worms stayed in the middle, exclude
wash	Armadillidium sp.	2	N2	L4	wash	DMSO	5	12	17	NA	no	most worms stayed in the middle, exclude
wash	Armadillidium sp.	2	N2	L4	wash	H2O	5	3	8	NA	no	most worms stayed in the middle, exclude
wash	Armadillidium sp.	2	N2	L4	wash	EtOH	4	4	8	NA	no	most worms stayed in the middle, exclude
wash	Armadillidium sp.	3	MY2079	L4	isoamylalc	EtOH	61	12	73	0.671233	yes
wash	Armadillidium sp.	3	MY2079	L4	isoamylalc	DMSO	54	11	65	0.661538	yes
wash	Armadillidium sp.	3	MY2079	L4	isoamylalc	H2O	47	8	55	0.709091	yes
wash	Armadillidium sp.	3	MY2079	L4	octanol	EtOH	7	30	37	-0.621622	yes
wash	Armadillidium sp.	3	MY2079	L4	octanol	DMSO	5	41	46	-0.782609	yes
wash	Armadillidium sp.	3	MY2079	L4	octanol	H2O	7	30	37	-0.621622	yes
wash	Armadillidium sp.	3	MY2079	L4	wash	EtOH	20	22	42	-0.047619	yes
wash	Armadillidium sp.	3	MY2079	L4	wash	DMSO	30	23	53	0.132075	yes
wash	Armadillidium sp.	3	MY2079	L4	wash	H2O	19	20	39	-0.025641	yes
wash	Armadillidium sp.	3	N2	L4	isoamylalc	EtOH	50	10	60	0.666667	yes
wash	Armadillidium sp.	3	N2	L4	isoamylalc	DMSO	52	7	59	0.762712	yes
wash	Armadillidium sp.	3	N2	L4	isoamylalc	H2O	34	4	38	0.789474	yes
wash	Armadillidium sp.	3	N2	L4	octanol	EtOH	9	50	59	-0.694915	yes
wash	Armadillidium sp.	3	N2	L4	octanol	DMSO	6	34	40	-0.7	yes
wash	Armadillidium sp.	3	N2	L4	octanol	H2O	9	37	46	-0.608696	yes
wash	Armadillidium sp.	3	N2	L4	wash	EtOH	25	30	55	-0.0909091	yes
wash	Armadillidium sp.	3	N2	L4	wash	DMSO	34	33	67	0.0149254	yes
wash	Armadillidium sp.	3	N2	L4	wash	H2O	24	14	38	0.263158	yes
wash	Armadillidium sp.	4	MY2079	L4	isoamylalc	H2O	55	12	67	0.641791	yes
wash	Armadillidium sp.	4	MY2079	L4	isoamylalc	EtOH	45	6	51	0.764706	yes
wash	Armadillidium sp.	4	MY2079	L4	isoamylalc	DMSO	49	17	66	0.484848	yes
wash	Armadillidium sp.	4	MY2079	L4	octanol	H2O	4	50	54	-0.851852	yes
wash	Armadillidium sp.	4	MY2079	L4	octanol	EtOH	2	61	63	-0.936508	yes
wash	Armadillidium sp.	4	MY2079	L4	octanol	DMSO	3	57	60	-0.9	yes
wash	Armadillidium sp.	4	MY2079	L4	wash	H2O	25	24	49	0.0204082	yes
wash	Armadillidium sp.	4	MY2079	L4	wash	EtOH	33	43	76	-0.131579	yes
wash	Armadillidium sp.	4	MY2079	L4	wash	DMSO	25	34	59	-0.152542	yes
wash	Armadillidium sp.	4	N2	L4	isoamylalc	H2O	62	1	63	0.968254	yes
wash	Armadillidium sp.	4	N2	L4	isoamylalc	EtOH	63	3	66	0.909091	yes
wash	Armadillidium sp.	4	N2	L4	isoamylalc	DMSO	48	2	50	0.92	yes
wash	Armadillidium sp.	4	N2	L4	octanol	H2O	9	56	65	-0.723077	yes
wash	Armadillidium sp.	4	N2	L4	octanol	EtOH	2	55	57	-0.929825	yes
wash	Armadillidium sp.	4	N2	L4	octanol	DMSO	4	38	42	-0.809524	yes
wash	Armadillidium sp.	4	N2	L4	wash	H2O	35	20	55	0.272727	yes
wash	Armadillidium sp.	4	N2	L4	wash	EtOH	35	34	69	0.0144928	yes
wash	Armadillidium sp.	4	N2	L4	wash	DMSO	21	39	60	-0.3	yes
wash	Armadillidium sp.	5	MY2079	L4	isoamylalc	H2O	33	5	38	0.736842	yes
wash	Armadillidium sp.	5	MY2079	L4	isoamylalc	EtOH	39	11	50	0.56	yes
wash	Armadillidium sp.	5	MY2079	L4	isoamylalc	DMSO	45	12	57	0.578947	yes
wash	Armadillidium sp.	5	MY2079	L4	octanol	H2O	2	41	43	-0.906977	yes
wash	Armadillidium sp.	5	MY2079	L4	octanol	EtOH	3	48	51	-0.882353	yes
wash	Armadillidium sp.	5	MY2079	L4	octanol	DMSO	0	30	30	-1	yes
wash	Armadillidium sp.	5	MY2079	L4	wash	H2O	28	30	58	-0.0344828	yes
wash	Armadillidium sp.	5	MY2079	L4	wash	EtOH	32	27	59	0.0847458	yes
wash	Armadillidium sp.	5	MY2079	L4	wash	DMSO	31	23	54	0.148148	yes
wash	Armadillidium sp.	5	N2	L4	isoamylalc	H2O	42	4	46	0.826087	yes
wash	Armadillidium sp.	5	N2	L4	isoamylalc	EtOH	39	1	40	0.95	yes
wash	Armadillidium sp.	5	N2	L4	isoamylalc	DMSO	40	6	46	0.73913	yes
wash	Armadillidium sp.	5	N2	L4	octanol	H2O	1	35	36	-0.944444	yes
wash	Armadillidium sp.	5	N2	L4	octanol	EtOH	6	47	53	-0.773585	yes
wash	Armadillidium sp.	5	N2	L4	octanol	DMSO	16	48	64	-0.5	yes
wash	Armadillidium sp.	5	N2	L4	wash	H2O	22	14	36	0.222222	yes
wash	Armadillidium sp.	5	N2	L4	wash	EtOH	30	30	60	0	yes
wash	Armadillidium sp.	5	N2	L4	wash	DMSO	23	23	46	0	yes
wash	Armadillidium sp.	6	MY2079	L4	isoamylalc	H2O	72	14	86	0.674419	yes
wash	Armadillidium sp.	6	MY2079	L4	isoamylalc	EtOH	57	14	71	0.605634	yes
wash	Armadillidium sp.	6	MY2079	L4	isoamylalc	DMSO	39	15	54	0.444444	yes
wash	Armadillidium sp.	6	MY2079	L4	octanol	H2O	7	22	29	-0.517241	yes
wash	Armadillidium sp.	6	MY2079	L4	octanol	EtOH	16	25	41	-0.219512	yes
wash	Armadillidium sp.	6	MY2079	L4	octanol	DMSO	9	12	21	-0.142857	yes
wash	Armadillidium sp.	6	MY2079	L4	wash	H2O	16	20	36	-0.111111	yes
wash	Armadillidium sp.	6	MY2079	L4	wash	EtOH	18	27	45	-0.2	yes
wash	Armadillidium sp.	6	MY2079	L4	wash	DMSO	41	34	75	0.0933333	yes
wash	Armadillidium sp.	6	N2	L4	isoamylalc	H2O	37	4	41	0.804878	yes
wash	Armadillidium sp.	6	N2	L4	isoamylalc	EtOH	32	12	44	0.454545	yes
wash	Armadillidium sp.	6	N2	L4	isoamylalc	DMSO	31	12	43	0.44186	yes
wash	Armadillidium sp.	6	N2	L4	octanol	H2O	4	33	37	-0.783784	yes
wash	Armadillidium sp.	6	N2	L4	octanol	EtOH	11	52	63	-0.650794	yes
wash	Armadillidium sp.	6	N2	L4	octanol	DMSO	4	42	46	-0.826087	yes
wash	Armadillidium sp.	6	N2	L4	wash	H2O	17	26	43	-0.209302	yes
wash	Armadillidium sp.	6	N2	L4	wash	EtOH	14	23	37	-0.243243	yes
wash	Armadillidium sp.	6	N2	L4	wash	DMSO	30	24	54	0.111111	yes
wash	Armadillidium sp.	7	MY2079	L4	isoamylalc	EtOH	70	24	94	0.489362	yes
wash	Armadillidium sp.	7	MY2079	L4	isoamylalc	DMSO	63	23	86	0.465116	yes
wash	Armadillidium sp.	7	MY2079	L4	isoamylalc	H2O	74	3	77	0.922078	yes
wash	Armadillidium sp.	7	MY2079	L4	octanol	EtOH	3	57	60	-0.9	yes
wash	Armadillidium sp.	7	MY2079	L4	octanol	DMSO	19	83	102	-0.627451	yes
wash	Armadillidium sp.	7	MY2079	L4	octanol	H2O	15	94	109	-0.724771	yes
wash	Armadillidium sp.	7	MY2079	L4	wash	EtOH	36	31	67	0.0746269	yes
wash	Armadillidium sp.	7	MY2079	L4	wash	DMSO	29	37	66	-0.121212	yes
wash	Armadillidium sp.	7	MY2079	L4	wash	H2O	44	80	124	-0.290323	yes
wash	Armadillidium sp.	7	N2	L4	isoamylalc	EtOH	58	9	67	0.731343	yes
wash	Armadillidium sp.	7	N2	L4	isoamylalc	DMSO	47	5	52	0.807692	yes
wash	Armadillidium sp.	7	N2	L4	isoamylalc	H2O	98	14	112	0.75	yes
wash	Armadillidium sp.	7	N2	L4	octanol	EtOH	4	23	27	-0.703704	yes
wash	Armadillidium sp.	7	N2	L4	octanol	DMSO	13	33	46	-0.434783	yes
wash	Armadillidium sp.	7	N2	L4	octanol	H2O	19	39	58	-0.344828	yes
wash	Armadillidium sp.	7	N2	L4	wash	EtOH	19	26	45	-0.155556	yes
wash	Armadillidium sp.	7	N2	L4	wash	DMSO	20	25	45	-0.111111	yes
wash	Armadillidium sp.	7	N2	L4	wash	H2O	28	22	50	0.12	yes
wash	Armadillidium sp.	8	MY2079	L4	isoamylalc	H2O	82	26	108	0.518519	yes
wash	Armadillidium sp.	8	MY2079	L4	isoamylalc	DMSO	87	30	117	0.487179	yes
wash	Armadillidium sp.	8	MY2079	L4	isoamylalc	EtOH	109	28	137	0.591241	yes
wash	Armadillidium sp.	8	MY2079	L4	octanol	H2O	8	55	63	-0.746032	yes
wash	Armadillidium sp.	8	MY2079	L4	octanol	DMSO	8	64	72	-0.777778	yes
wash	Armadillidium sp.	8	MY2079	L4	octanol	EtOH	12	66	78	-0.692308	yes
wash	Armadillidium sp.	8	MY2079	L4	wash	H2O	37	31	68	0.0882353	yes
wash	Armadillidium sp.	8	MY2079	L4	wash	DMSO	32	46	78	-0.179487	yes
wash	Armadillidium sp.	8	MY2079	L4	wash	EtOH	46	45	91	0.010989	yes
wash	Armadillidium sp.	8	N2	L4	isoamylalc	H2O	78	6	84	0.857143	yes
wash	Armadillidium sp.	8	N2	L4	isoamylalc	DMSO	78	13	91	0.714286	yes
wash	Armadillidium sp.	8	N2	L4	isoamylalc	EtOH	66	6	72	0.833333	yes
wash	Armadillidium sp.	8	N2	L4	octanol	H2O	7	103	110	-0.872727	yes
wash	Armadillidium sp.	8	N2	L4	octanol	DMSO	6	71	77	-0.844156	yes
wash	Armadillidium sp.	8	N2	L4	octanol	EtOH	15	78	93	-0.677419	yes
wash	Armadillidium sp.	8	N2	L4	wash	H2O	33	44	77	-0.142857	yes
wash	Armadillidium sp.	8	N2	L4	wash	DMSO	81	53	134	0.208955	yes
wash	Armadillidium sp.	8	N2	L4	wash	EtOH	46	60	106	-0.132075	yes
wash	Armadillidium sp.	9	MY2079	L4	isoamylalc	H2O	67	18	85	0.576471	yes
wash	Armadillidium sp.	9	MY2079	L4	isoamylalc	EtOH	50	13	63	0.587302	yes
wash	Armadillidium sp.	9	MY2079	L4	isoamylalc	DMSO	35	3	38	0.842105	yes
wash	Armadillidium sp.	9	MY2079	L4	octanol	H2O	3	60	63	-0.904762	yes
wash	Armadillidium sp.	9	MY2079	L4	octanol	EtOH	6	39	45	-0.733333	yes
wash	Armadillidium sp.	9	MY2079	L4	octanol	DMSO	3	58	61	-0.901639	yes
wash	Armadillidium sp.	9	MY2079	L4	wash	H2O	31	30	61	0.0163934	yes
wash	Armadillidium sp.	9	MY2079	L4	wash	EtOH	36	57	93	-0.225806	yes
wash	Armadillidium sp.	9	MY2079	L4	wash	DMSO	34	34	68	0	yes
wash	Armadillidium sp.	9	N2	L4	isoamylalc	H2O	43	9	52	0.653846	yes
wash	Armadillidium sp.	9	N2	L4	isoamylalc	EtOH	46	4	50	0.84	yes
wash	Armadillidium sp.	9	N2	L4	isoamylalc	DMSO	43	8	51	0.686275	yes
wash	Armadillidium sp.	9	N2	L4	octanol	H2O	6	19	25	-0.52	yes
wash	Armadillidium sp.	9	N2	L4	octanol	EtOH	2	39	41	-0.902439	yes
wash	Armadillidium sp.	9	N2	L4	octanol	DMSO	9	31	40	-0.55	yes
wash	Armadillidium sp.	9	N2	L4	wash	H2O	31	25	56	0.107143	yes
wash	Armadillidium sp.	9	N2	L4	wash	EtOH	18	27	45	-0.2	yes
wash	Armadillidium sp.	9	N2	L4	wash	DMSO	28	14	42	0.333333	yes
wash	Armadillidium sp.	10	MY2079	L4	isoamylalc	DMSO	62	29	91	0.362637	yes
wash	Armadillidium sp.	10	MY2079	L4	isoamylalc	EtOH	77	19	96	0.604167	yes
wash	Armadillidium sp.	10	MY2079	L4	isoamylalc	H2O	53	21	74	0.432432	yes
wash	Armadillidium sp.	10	MY2079	L4	octanol	DMSO	9	45	54	-0.666667	yes
wash	Armadillidium sp.	10	MY2079	L4	octanol	EtOH	8	63	71	-0.774648	yes
wash	Armadillidium sp.	10	MY2079	L4	octanol	H2O	8	69	77	-0.792208	yes
wash	Armadillidium sp.	10	MY2079	L4	wash	DMSO	28	26	54	0.037037	yes
wash	Armadillidium sp.	10	MY2079	L4	wash	EtOH	33	47	80	-0.175	yes
wash	Armadillidium sp.	10	MY2079	L4	wash	H2O	51	39	90	0.133333	yes
wash	Armadillidium sp.	10	N2	L4	isoamylalc	DMSO	48	3	51	0.882353	yes
wash	Armadillidium sp.	10	N2	L4	isoamylalc	EtOH	40	8	48	0.666667	yes
wash	Armadillidium sp.	10	N2	L4	isoamylalc	H2O	34	3	37	0.837838	yes
wash	Armadillidium sp.	10	N2	L4	octanol	DMSO	5	13	18	-0.444444	yes
wash	Armadillidium sp.	10	N2	L4	octanol	EtOH	4	14	18	-0.555556	yes
wash	Armadillidium sp.	10	N2	L4	octanol	H2O	5	16	21	-0.52381	yes
wash	Armadillidium sp.	10	N2	L4	wash	DMSO	20	17	37	0.0810811	yes
wash	Armadillidium sp.	10	N2	L4	wash	EtOH	17	20	37	-0.0810811	yes
wash	Armadillidium sp.	10	N2	L4	wash	H2O	28	29	57	-0.0175439	yes
wash	Armadillidium sp.	11	MY2079	L4	isoamylalc	DMSO	48	17	65	0.476923	yes
wash	Armadillidium sp.	11	MY2079	L4	isoamylalc	DMSO	31	10	41	0.512195	yes
wash	Armadillidium sp.	11	MY2079	L4	isoamylalc	H2O	81	12	93	0.741935	yes
wash	Armadillidium sp.	11	MY2079	L4	octanol	DMSO	11	59	70	-0.685714	yes
wash	Armadillidium sp.	11	MY2079	L4	octanol	DMSO	15	37	52	-0.423077	yes
wash	Armadillidium sp.	11	MY2079	L4	octanol	H2O	5	42	47	-0.787234	yes
wash	Armadillidium sp.	11	MY2079	L4	wash	DMSO	47	39	86	0.0930233	yes
wash	Armadillidium sp.	11	MY2079	L4	wash	DMSO	34	39	73	-0.0684932	yes
wash	Armadillidium sp.	11	MY2079	L4	wash	H2O	32	29	61	0.0491803	yes
wash	Armadillidium sp.	11	N2	L4	isoamylalc	DMSO	51	8	59	0.728814	yes
wash	Armadillidium sp.	11	N2	L4	isoamylalc	DMSO	57	6	63	0.809524	yes
wash	Armadillidium sp.	11	N2	L4	isoamylalc	H2O	73	10	83	0.759036	yes
wash	Armadillidium sp.	11	N2	L4	octanol	DMSO	4	20	24	-0.666667	yes
wash	Armadillidium sp.	11	N2	L4	octanol	DMSO	5	21	26	-0.615385	yes
wash	Armadillidium sp.	11	N2	L4	octanol	H2O	7	34	41	-0.658537	yes
wash	Armadillidium sp.	11	N2	L4	wash	DMSO	32	34	66	-0.030303	yes
wash	Armadillidium sp.	11	N2	L4	wash	DMSO	14	17	31	-0.0967742	yes
wash	Armadillidium sp.	11	N2	L4	wash	H2O	24	22	46	0.0434783	yes

## Sheet: 1D Armadillidium wash dauer
assay	invertebrate_species	rep	worm_strain	stage	choice_treat	solvent	count_treat	count_solvent	total	index	include	comments
wash	Armadillidium sp.	1	MY2079	dauer	octanol	H2O	15	28	43	-0.302326	yes
wash	Armadillidium sp.	1	MY2079	dauer	isoamylalc	EtOH	32	33	65	-0.0153846	yes
wash	Armadillidium sp.	1	MY2079	dauer	octanol	EtOH	22	48	70	-0.371429	yes
wash	Armadillidium sp.	1	MY2079	dauer	octanol	DMSO	29	44	73	-0.205479	yes
wash	Armadillidium sp.	1	MY2079	dauer	isoamylalc	DMSO	52	22	74	0.405405	yes
wash	Armadillidium sp.	1	MY2079	dauer	isoamylalc	H2O	43	31	74	0.162162	yes
wash	Armadillidium sp.	1	MY2079	dauer	wash	DMSO	31	44	75	-0.173333	yes
wash	Armadillidium sp.	1	MY2079	dauer	wash	EtOH	36	40	76	-0.0526316	yes
wash	Armadillidium sp.	1	MY2079	dauer	wash	H2O	51	44	95	0.0736842	yes
wash	Armadillidium sp.	1	N2	dauer	isoamylalc	EtOH	1	0	1	NA	no	threshold not reached, exclude
wash	Armadillidium sp.	1	N2	dauer	isoamylalc	DMSO	1	1	2	NA	no	threshold not reached, exclude
wash	Armadillidium sp.	1	N2	dauer	wash	DMSO	3	1	4	NA	no	threshold not reached, exclude
wash	Armadillidium sp.	1	N2	dauer	wash	EtOH	2	3	5	NA	no	threshold not reached, exclude
wash	Armadillidium sp.	1	N2	dauer	isoamylalc	H2O	1	4	5	NA	no	threshold not reached, exclude
wash	Armadillidium sp.	1	N2	dauer	octanol	EtOH	1	6	7	NA	no	threshold not reached, exclude
wash	Armadillidium sp.	1	N2	dauer	octanol	DMSO	3	6	9	NA	no	threshold not reached, exclude
wash	Armadillidium sp.	1	N2	dauer	wash	H2O	6	3	9	NA	no	threshold not reached, exclude
wash	Armadillidium sp.	1	N2	dauer	octanol	H2O	3	15	18	-0.666667	yes
wash	Armadillidium sp.	2	MY2079	dauer	wash	DMSO	11	12	23	-0.0434783	yes
wash	Armadillidium sp.	2	MY2079	dauer	isoamylalc	H2O	21	6	27	0.555556	yes
wash	Armadillidium sp.	2	MY2079	dauer	octanol	DMSO	5	22	27	-0.62963	yes
wash	Armadillidium sp.	2	MY2079	dauer	octanol	H2O	11	20	31	-0.290323	yes
wash	Armadillidium sp.	2	MY2079	dauer	isoamylalc	EtOH	26	9	35	0.485714	yes
wash	Armadillidium sp.	2	MY2079	dauer	isoamylalc	DMSO	24	12	36	0.333333	yes
wash	Armadillidium sp.	2	MY2079	dauer	wash	EtOH	23	14	37	0.243243	yes
wash	Armadillidium sp.	2	MY2079	dauer	octanol	EtOH	12	34	46	-0.478261	yes
wash	Armadillidium sp.	2	MY2079	dauer	wash	H2O	51	3	54	0.888889	yes
wash	Armadillidium sp.	2	N2	dauer	wash	EtOH	0	0	0	NA	no	threshold not reached, exclude
wash	Armadillidium sp.	2	N2	dauer	isoamylalc	H2O	2	3	5	NA	no	threshold not reached, exclude
wash	Armadillidium sp.	2	N2	dauer	octanol	H2O	3	3	6	NA	no	threshold not reached, exclude
wash	Armadillidium sp.	2	N2	dauer	octanol	EtOH	4	6	10	-0.2	yes
wash	Armadillidium sp.	2	N2	dauer	isoamylalc	EtOH	7	4	11	0.272727	yes
wash	Armadillidium sp.	2	N2	dauer	octanol	DMSO	4	8	12	-0.333333	yes
wash	Armadillidium sp.	2	N2	dauer	isoamylalc	DMSO	9	5	14	0.285714	yes
wash	Armadillidium sp.	2	N2	dauer	wash	DMSO	9	6	15	0.2	yes
wash	Armadillidium sp.	2	N2	dauer	wash	H2O	10	9	19	0.0526316	yes
wash	Armadillidium sp.	3	MY2079	dauer	octanol	H2O	6	23	29	-0.586207	yes
wash	Armadillidium sp.	3	MY2079	dauer	isoamylalc	DMSO	22	11	33	0.333333	yes
wash	Armadillidium sp.	3	MY2079	dauer	wash	EtOH	15	19	34	-0.117647	yes
wash	Armadillidium sp.	3	MY2079	dauer	isoamylalc	H2O	24	14	38	0.263158	yes
wash	Armadillidium sp.	3	MY2079	dauer	isoamylalc	EtOH	23	15	38	0.210526	yes
wash	Armadillidium sp.	3	MY2079	dauer	octanol	EtOH	18	31	49	-0.265306	yes
wash	Armadillidium sp.	3	MY2079	dauer	wash	H2O	30	20	50	0.2	yes
wash	Armadillidium sp.	3	MY2079	dauer	wash	DMSO	27	32	59	-0.0847458	yes
wash	Armadillidium sp.	3	MY2079	dauer	octanol	DMSO	20	43	63	-0.365079	yes
wash	Armadillidium sp.	3	N2	dauer	isoamylalc	DMSO	0	0	0	NA	no	threshold not reached, exclude
wash	Armadillidium sp.	3	N2	dauer	isoamylalc	H2O	1	0	1	NA	no	threshold not reached, exclude
wash	Armadillidium sp.	3	N2	dauer	wash	EtOH	1	0	1	NA	no	threshold not reached, exclude
wash	Armadillidium sp.	3	N2	dauer	isoamylalc	EtOH	1	0	1	NA	no	threshold not reached, exclude
wash	Armadillidium sp.	3	N2	dauer	octanol	H2O	0	2	2	NA	no	threshold not reached, exclude
wash	Armadillidium sp.	3	N2	dauer	octanol	DMSO	0	3	3	NA	no	threshold not reached, exclude
wash	Armadillidium sp.	3	N2	dauer	wash	DMSO	1	4	5	NA	no	threshold not reached, exclude
wash	Armadillidium sp.	3	N2	dauer	octanol	EtOH	1	4	5	NA	no	threshold not reached, exclude
wash	Armadillidium sp.	3	N2	dauer	wash	H2O	3	4	7	NA	no	threshold not reached, exclude
wash	Armadillidium sp.	4	MY2079	dauer	octanol	EtOH	17	33	50	-0.32	yes
wash	Armadillidium sp.	4	MY2079	dauer	isoamylalc	DMSO	37	14	51	0.45098	yes
wash	Armadillidium sp.	4	MY2079	dauer	octanol	DMSO	17	38	55	-0.381818	yes
wash	Armadillidium sp.	4	MY2079	dauer	wash	H2O	36	22	58	0.241379	yes
wash	Armadillidium sp.	4	MY2079	dauer	octanol	H2O	17	42	59	-0.423729	yes
wash	Armadillidium sp.	4	MY2079	dauer	isoamylalc	H2O	31	30	61	0.0163934	yes
wash	Armadillidium sp.	4	MY2079	dauer	wash	EtOH	30	33	63	-0.047619	yes
wash	Armadillidium sp.	4	MY2079	dauer	isoamylalc	EtOH	36	29	65	0.107692	yes
wash	Armadillidium sp.	4	MY2079	dauer	wash	DMSO	40	37	77	0.038961	yes
wash	Armadillidium sp.	4	N2	dauer	isoamylalc	H2O	2	2	4	NA	no	threshold not reached, exclude
wash	Armadillidium sp.	4	N2	dauer	octanol	DMSO	3	2	5	NA	no	threshold not reached, exclude
wash	Armadillidium sp.	4	N2	dauer	wash	EtOH	1	4	5	NA	no	threshold not reached, exclude
wash	Armadillidium sp.	4	N2	dauer	isoamylalc	EtOH	2	3	5	NA	no	threshold not reached, exclude
wash	Armadillidium sp.	4	N2	dauer	octanol	EtOH	2	5	7	NA	no	threshold not reached, exclude
wash	Armadillidium sp.	4	N2	dauer	isoamylalc	DMSO	4	4	8	NA	no	threshold not reached, exclude
wash	Armadillidium sp.	4	N2	dauer	octanol	H2O	3	6	9	NA	no	threshold not reached, exclude
wash	Armadillidium sp.	4	N2	dauer	wash	H2O	4	6	10	-0.2	yes
wash	Armadillidium sp.	4	N2	dauer	wash	DMSO	7	7	14	0	yes
wash	Armadillidium sp.	5	MY2079	dauer	wash	H2O	27	24	51	0.0588235	yes
wash	Armadillidium sp.	5	MY2079	dauer	wash	DMSO	43	34	77	0.116883	yes
wash	Armadillidium sp.	5	MY2079	dauer	wash	EtOH	43	35	78	0.102564	yes
wash	Armadillidium sp.	5	MY2079	dauer	octanol	EtOH	32	48	80	-0.2	yes
wash	Armadillidium sp.	5	MY2079	dauer	isoamylalc	EtOH	62	24	86	0.44186	yes
wash	Armadillidium sp.	5	MY2079	dauer	octanol	DMSO	20	67	87	-0.54023	yes
wash	Armadillidium sp.	5	MY2079	dauer	isoamylalc	DMSO	74	14	88	0.681818	yes
wash	Armadillidium sp.	5	MY2079	dauer	octanol	H2O	36	53	89	-0.191011	yes
wash	Armadillidium sp.	5	MY2079	dauer	isoamylalc	H2O	84	12	96	0.75	yes
wash	Armadillidium sp.	5	N2	dauer	wash	DMSO	1	0	1	NA	no	threshold not reached, exclude
wash	Armadillidium sp.	5	N2	dauer	wash	EtOH	4	1	5	NA	no	threshold not reached, exclude
wash	Armadillidium sp.	5	N2	dauer	wash	H2O	3	4	7	NA	no	threshold not reached, exclude
wash	Armadillidium sp.	5	N2	dauer	octanol	DMSO	3	5	8	NA	no	threshold not reached, exclude
wash	Armadillidium sp.	5	N2	dauer	octanol	H2O	6	2	8	NA	no	threshold not reached, exclude
wash	Armadillidium sp.	5	N2	dauer	isoamylalc	DMSO	9	2	11	0.636364	yes
wash	Armadillidium sp.	5	N2	dauer	isoamylalc	H2O	11	3	14	0.571429	yes
wash	Armadillidium sp.	5	N2	dauer	isoamylalc	EtOH	9	6	15	0.2	yes
wash	Armadillidium sp.	5	N2	dauer	octanol	EtOH	8	11	19	-0.157895	yes
wash	Armadillidium sp.	6	MY2079	dauer	wash	DMSO	47	46	93	0.0107527	yes
wash	Armadillidium sp.	6	MY2079	dauer	octanol	EtOH	38	59	97	-0.216495	yes
wash	Armadillidium sp.	6	MY2079	dauer	octanol	DMSO	55	54	109	0.00917431	yes
wash	Armadillidium sp.	6	MY2079	dauer	octanol	H2O	48	76	124	-0.225806	yes
wash	Armadillidium sp.	6	MY2079	dauer	wash	H2O	78	69	147	0.0612245	yes
wash	Armadillidium sp.	6	MY2079	dauer	wash	EtOH	122	115	237	0.0295359	yes
wash	Armadillidium sp.	6	MY2079	dauer	isoamylalc	H2O	NA	NA	NA	NA	no	worm strains swapped, exclude
wash	Armadillidium sp.	6	MY2079	dauer	isoamylalc	DMSO	NA	NA	NA	NA	no	worm strains swapped, exclude
wash	Armadillidium sp.	6	MY2079	dauer	isoamylalc	EtOH	NA	NA	NA	NA	no	worm strains swapped, exclude
wash	Armadillidium sp.	6	N2	dauer	isoamylalc	DMSO	3	2	5	0.2	no	threshold not reached, exclude
wash	Armadillidium sp.	6	N2	dauer	wash	EtOH	3	4	7	-0.142857	no	threshold not reached, exclude
wash	Armadillidium sp.	6	N2	dauer	wash	H2O	6	4	10	0.2	yes
wash	Armadillidium sp.	6	N2	dauer	wash	DMSO	7	6	13	0.0769231	yes
wash	Armadillidium sp.	6	N2	dauer	isoamylalc	EtOH	7	10	17	-0.176471	yes
wash	Armadillidium sp.	6	N2	dauer	isoamylalc	H2O	26	9	35	0.485714	yes
wash	Armadillidium sp.	6	N2	dauer	octanol	H2O	NA	NA	NA	NA	no	worm strains swapped, exclude
wash	Armadillidium sp.	6	N2	dauer	octanol	DMSO	NA	NA	NA	NA	no	worm strains swapped, exclude
wash	Armadillidium sp.	6	N2	dauer	octanol	EtOH	NA	NA	NA	NA	no	worm strains swapped, exclude
wash	Armadillidium sp.	7	MY2079	dauer	isoamylalc	H2O	34	18	52	0.307692	yes
wash	Armadillidium sp.	7	MY2079	dauer	wash	EtOH	30	27	57	0.0526316	yes
wash	Armadillidium sp.	7	MY2079	dauer	isoamylalc	DMSO	78	7	85	0.835294	yes
wash	Armadillidium sp.	7	MY2079	dauer	octanol	DMSO	35	53	88	-0.204545	yes
wash	Armadillidium sp.	7	MY2079	dauer	wash	H2O	49	56	105	-0.0666667	yes
wash	Armadillidium sp.	7	MY2079	dauer	octanol	EtOH	56	65	121	-0.0743802	yes
wash	Armadillidium sp.	7	MY2079	dauer	isoamylalc	EtOH	106	17	123	0.723577	yes
wash	Armadillidium sp.	7	MY2079	dauer	wash	DMSO	60	73	133	-0.0977444	yes
wash	Armadillidium sp.	7	MY2079	dauer	octanol	H2O	74	104	178	-0.168539	yes
wash	Armadillidium sp.	7	N2	dauer	octanol	H2O	12	10	22	0.0909091	yes
wash	Armadillidium sp.	7	N2	dauer	wash	EtOH	12	12	24	0	yes
wash	Armadillidium sp.	7	N2	dauer	octanol	EtOH	9	17	26	-0.307692	yes
wash	Armadillidium sp.	7	N2	dauer	wash	DMSO	9	18	27	-0.333333	yes
wash	Armadillidium sp.	7	N2	dauer	isoamylalc	EtOH	12	16	28	-0.142857	yes
wash	Armadillidium sp.	7	N2	dauer	wash	H2O	15	14	29	0.0344828	yes
wash	Armadillidium sp.	7	N2	dauer	isoamylalc	DMSO	31	9	40	0.55	yes
wash	Armadillidium sp.	7	N2	dauer	octanol	DMSO	22	22	44	0	yes
wash	Armadillidium sp.	7	N2	dauer	isoamylalc	H2O	46	18	64	0.4375	yes
wash	Armadillidium sp.	8	MY2079	dauer	wash	EtOH	60	73	133	-0.0977444	yes
wash	Armadillidium sp.	8	MY2079	dauer	isoamylalc	DMSO	108	62	170	0.270588	yes
wash	Armadillidium sp.	8	MY2079	dauer	octanol	EtOH	58	159	217	-0.465438	yes
wash	Armadillidium sp.	8	MY2079	dauer	octanol	DMSO	49	170	219	-0.552511	yes
wash	Armadillidium sp.	8	MY2079	dauer	wash	DMSO	101	118	219	-0.0776256	yes
wash	Armadillidium sp.	8	MY2079	dauer	isoamylalc	EtOH	130	97	227	0.145374	yes
wash	Armadillidium sp.	8	MY2079	dauer	octanol	H2O	53	175	228	-0.535088	yes
wash	Armadillidium sp.	8	MY2079	dauer	wash	H2O	122	117	239	0.0209205	yes
wash	Armadillidium sp.	8	MY2079	dauer	isoamylalc	H2O	194	126	320	0.2125	yes
wash	Armadillidium sp.	8	N2	dauer	wash	H2O	9	4	13	0.384615	yes
wash	Armadillidium sp.	8	N2	dauer	wash	DMSO	7	9	16	-0.125	yes
wash	Armadillidium sp.	8	N2	dauer	isoamylalc	DMSO	13	3	16	0.625	yes
wash	Armadillidium sp.	8	N2	dauer	wash	EtOH	8	8	16	0	yes
wash	Armadillidium sp.	8	N2	dauer	isoamylalc	EtOH	10	6	16	0.25	yes
wash	Armadillidium sp.	8	N2	dauer	octanol	H2O	8	9	17	-0.0588235	yes
wash	Armadillidium sp.	8	N2	dauer	isoamylalc	H2O	13	5	18	0.444444	yes
wash	Armadillidium sp.	8	N2	dauer	octanol	EtOH	6	16	22	-0.454545	yes
wash	Armadillidium sp.	8	N2	dauer	octanol	DMSO	10	17	27	-0.259259	yes
wash	Armadillidium sp.	9	MY2079	dauer	wash	EtOH	75	11	86	0.744186	yes
wash	Armadillidium sp.	9	MY2079	dauer	octanol	DMSO	53	72	125	-0.152	yes
wash	Armadillidium sp.	9	MY2079	dauer	wash	H2O	69	72	141	-0.0212766	yes
wash	Armadillidium sp.	9	MY2079	dauer	isoamylalc	H2O	91	62	153	0.189542	yes
wash	Armadillidium sp.	9	MY2079	dauer	isoamylalc	DMSO	88	66	154	0.142857	yes
wash	Armadillidium sp.	9	MY2079	dauer	octanol	H2O	76	102	178	-0.146067	yes
wash	Armadillidium sp.	9	MY2079	dauer	isoamylalc	EtOH	101	79	180	0.122222	yes
wash	Armadillidium sp.	9	MY2079	dauer	wash	DMSO	83	122	205	-0.190244	yes
wash	Armadillidium sp.	9	MY2079	dauer	octanol	EtOH	66	143	209	-0.368421	yes
wash	Armadillidium sp.	9	N2	dauer	isoamylalc	DMSO	4	2	6	NA	no	threshold not reached, exclude
wash	Armadillidium sp.	9	N2	dauer	wash	H2O	15	1	16	0.875	yes
wash	Armadillidium sp.	9	N2	dauer	isoamylalc	H2O	9	8	17	0.0588235	yes
wash	Armadillidium sp.	9	N2	dauer	octanol	DMSO	11	13	24	-0.0833333	yes
wash	Armadillidium sp.	9	N2	dauer	octanol	EtOH	17	15	32	0.0625	yes
wash	Armadillidium sp.	9	N2	dauer	isoamylalc	EtOH	15	19	34	-0.117647	yes
wash	Armadillidium sp.	9	N2	dauer	wash	EtOH	18	19	37	-0.027027	yes
wash	Armadillidium sp.	9	N2	dauer	wash	DMSO	22	19	41	0.0731707	yes
wash	Armadillidium sp.	9	N2	dauer	octanol	H2O	34	21	55	0.236364	yes
wash	Armadillidium sp.	10	MY2079	dauer	wash	H2O	26	32	58	-0.103448	yes
wash	Armadillidium sp.	10	MY2079	dauer	octanol	EtOH	33	50	83	-0.204819	yes
wash	Armadillidium sp.	10	MY2079	dauer	isoamylalc	DMSO	68	32	100	0.36	yes
wash	Armadillidium sp.	10	MY2079	dauer	octanol	DMSO	48	56	104	-0.0769231	yes
wash	Armadillidium sp.	10	MY2079	dauer	wash	DMSO	48	63	111	-0.135135	yes
wash	Armadillidium sp.	10	MY2079	dauer	isoamylalc	EtOH	80	47	127	0.259843	yes
wash	Armadillidium sp.	10	MY2079	dauer	wash	EtOH	69	72	141	-0.0212766	yes
wash	Armadillidium sp.	10	MY2079	dauer	octanol	H2O	54	98	152	-0.289474	yes
wash	Armadillidium sp.	10	MY2079	dauer	isoamylalc	H2O	121	34	155	0.56129	yes
wash	Armadillidium sp.	10	N2	dauer	wash	EtOH	1	1	2	NA	no	threshold not reached, exclude
wash	Armadillidium sp.	10	N2	dauer	isoamylalc	EtOH	4	7	11	-0.272727	yes
wash	Armadillidium sp.	10	N2	dauer	wash	H2O	4	8	12	-0.333333	yes
wash	Armadillidium sp.	10	N2	dauer	wash	DMSO	5	8	13	-0.230769	yes
wash	Armadillidium sp.	10	N2	dauer	isoamylalc	H2O	6	9	15	-0.2	yes
wash	Armadillidium sp.	10	N2	dauer	isoamylalc	DMSO	10	8	18	0.111111	yes
wash	Armadillidium sp.	10	N2	dauer	octanol	H2O	10	11	21	-0.047619	yes
wash	Armadillidium sp.	10	N2	dauer	octanol	DMSO	17	16	33	0.030303	yes
wash	Armadillidium sp.	10	N2	dauer	octanol	EtOH	17	19	36	-0.0555556	yes
wash	Armadillidium sp.	11	MY2079	dauer	octanol	DMSO	36	40	76	-0.0526316	yes
wash	Armadillidium sp.	11	MY2079	dauer	isoamylalc	DMSO	47	34	81	0.160494	yes
wash	Armadillidium sp.	11	MY2079	dauer	octanol	EtOH	35	48	83	-0.156627	yes
wash	Armadillidium sp.	11	MY2079	dauer	octanol	H2O	38	50	88	-0.136364	yes
wash	Armadillidium sp.	11	MY2079	dauer	isoamylalc	EtOH	55	43	98	0.122449	yes
wash	Armadillidium sp.	11	MY2079	dauer	isoamylalc	H2O	72	30	102	0.411765	yes
wash	Armadillidium sp.	11	MY2079	dauer	wash	DMSO	68	50	118	0.152542	yes
wash	Armadillidium sp.	11	MY2079	dauer	wash	H2O	59	60	119	-0.00840336	yes
wash	Armadillidium sp.	11	MY2079	dauer	wash	EtOH	70	67	137	0.0218978	yes
wash	Armadillidium sp.	11	N2	dauer	isoamylalc	H2O	1	2	3	NA	no	threshold not reached, exclude
wash	Armadillidium sp.	11	N2	dauer	wash	EtOH	4	4	8	NA	no	threshold not reached, exclude
wash	Armadillidium sp.	11	N2	dauer	octanol	DMSO	5	5	10	0	yes
wash	Armadillidium sp.	11	N2	dauer	isoamylalc	EtOH	5	6	11	-0.0909091	yes
wash	Armadillidium sp.	11	N2	dauer	wash	H2O	9	5	14	0.285714	yes
wash	Armadillidium sp.	11	N2	dauer	octanol	H2O	11	8	19	0.157895	yes
wash	Armadillidium sp.	11	N2	dauer	isoamylalc	DMSO	10	11	21	-0.047619	yes
wash	Armadillidium sp.	11	N2	dauer	wash	DMSO	8	18	26	-0.384615	yes
wash	Armadillidium sp.	11	N2	dauer	octanol	EtOH	19	16	35	0.0857143	yes
wash	Armadillidium sp.	12	MY2079	dauer	wash	EtOH	43	43	86	0	yes
wash	Armadillidium sp.	12	MY2079	dauer	wash	H2O	56	69	125	-0.104	yes
wash	Armadillidium sp.	12	MY2079	dauer	wash	DMSO	62	71	133	-0.0676692	yes
wash	Armadillidium sp.	12	MY2079	dauer	octanol	H2O	63	78	141	-0.106383	yes
wash	Armadillidium sp.	12	MY2079	dauer	isoamylalc	EtOH	125	42	167	0.497006	yes
wash	Armadillidium sp.	12	MY2079	dauer	isoamylalc	DMSO	121	47	168	0.440476	yes
wash	Armadillidium sp.	12	MY2079	dauer	octanol	EtOH	96	96	192	0	yes
wash	Armadillidium sp.	12	MY2079	dauer	octanol	DMSO	87	118	205	-0.15122	yes
wash	Armadillidium sp.	12	MY2079	dauer	isoamylalc	H2O	160	46	206	0.553398	yes
wash	Armadillidium sp.	12	N2	dauer	wash	EtOH	3	4	7	NA	no	threshold not reached, exclude
wash	Armadillidium sp.	12	N2	dauer	wash	DMSO	5	4	9	NA	no	threshold not reached, exclude
wash	Armadillidium sp.	12	N2	dauer	isoamylalc	DMSO	10	8	18	0.111111	yes
wash	Armadillidium sp.	12	N2	dauer	wash	H2O	6	13	19	-0.368421	yes
wash	Armadillidium sp.	12	N2	dauer	isoamylalc	H2O	17	4	21	0.619048	yes
wash	Armadillidium sp.	12	N2	dauer	isoamylalc	EtOH	18	9	27	0.333333	yes
wash	Armadillidium sp.	12	N2	dauer	octanol	EtOH	17	19	36	-0.0555556	yes
wash	Armadillidium sp.	12	N2	dauer	octanol	H2O	16	23	39	-0.179487	yes
wash	Armadillidium sp.	12	N2	dauer	octanol	DMSO	23	28	51	-0.0980392	yes
wash	Armadillidium sp.	13	MY2079	dauer	isoamylalc	EtOH	56	47	103	0.0873786	yes
wash	Armadillidium sp.	13	MY2079	dauer	wash	EtOH	35	40	75	-0.0666667	yes
wash	Armadillidium sp.	13	MY2079	dauer	octanol	EtOH	36	50	86	-0.162791	yes
wash	Armadillidium sp.	13	MY2079	dauer	isoamylalc	H2O	74	45	119	0.243697	yes
wash	Armadillidium sp.	13	MY2079	dauer	wash	H2O	31	44	75	-0.173333	yes
wash	Armadillidium sp.	13	MY2079	dauer	octanol	H2O	26	51	77	-0.324675	yes
wash	Armadillidium sp.	13	MY2079	dauer	isoamylalc	DMSO	79	41	120	0.316667	yes
wash	Armadillidium sp.	13	MY2079	dauer	wash	DMSO	37	35	72	0.0277778	yes
wash	Armadillidium sp.	13	MY2079	dauer	octanol	DMSO	24	37	61	-0.213115	yes
wash	Armadillidium sp.	13	N2	dauer	isoamylalc	EtOH	10	3	13	0.538462	yes
wash	Armadillidium sp.	13	N2	dauer	wash	EtOH	7	8	15	-0.0666667	yes
wash	Armadillidium sp.	13	N2	dauer	octanol	EtOH	8	17	25	-0.36	yes
wash	Armadillidium sp.	13	N2	dauer	isoamylalc	H2O	1	1	2	NA	no	threshold not reached, exclude
wash	Armadillidium sp.	13	N2	dauer	wash	H2O	8	5	13	0.230769	yes
wash	Armadillidium sp.	13	N2	dauer	octanol	H2O	12	12	24	0	yes
wash	Armadillidium sp.	13	N2	dauer	isoamylalc	DMSO	7	7	14	0	yes
wash	Armadillidium sp.	13	N2	dauer	wash	DMSO	9	8	17	0.0588235	yes
wash	Armadillidium sp.	13	N2	dauer	octanol	DMSO	21	17	38	0.105263	yes
wash	Armadillidium sp.	14	MY2079	dauer	octanol	DMSO	42	73	115	-0.269565	yes
wash	Armadillidium sp.	14	MY2079	dauer	wash	DMSO	92	98	190	-0.0315789	yes
wash	Armadillidium sp.	14	MY2079	dauer	isoamylalc	DMSO	160	40	200	0.6	yes
wash	Armadillidium sp.	14	MY2079	dauer	octanol	EtOH	37	90	127	-0.417323	yes
wash	Armadillidium sp.	14	MY2079	dauer	wash	EtOH	56	57	113	-0.00884956	yes
wash	Armadillidium sp.	14	MY2079	dauer	isoamylalc	EtOH	154	34	188	0.638298	yes
wash	Armadillidium sp.	14	MY2079	dauer	octanol	H2O	20	29	49	-0.183673	yes
wash	Armadillidium sp.	14	MY2079	dauer	wash	H2O	88	70	158	0.113924	yes
wash	Armadillidium sp.	14	MY2079	dauer	isoamylalc	H2O	128	28	156	0.641026	yes
wash	Armadillidium sp.	14	N2	dauer	octanol	DMSO	9	26	35	-0.485714	yes
wash	Armadillidium sp.	14	N2	dauer	wash	DMSO	14	14	28	0	yes
wash	Armadillidium sp.	14	N2	dauer	isoamylalc	DMSO	8	11	19	-0.157895	yes
wash	Armadillidium sp.	14	N2	dauer	octanol	EtOH	29	38	67	-0.134328	yes
wash	Armadillidium sp.	14	N2	dauer	wash	EtOH	23	27	50	-0.08	yes
wash	Armadillidium sp.	14	N2	dauer	isoamylalc	EtOH	9	3	12	0.5	yes
wash	Armadillidium sp.	14	N2	dauer	octanol	H2O	39	55	94	-0.170213	yes
wash	Armadillidium sp.	14	N2	dauer	wash	H2O	13	10	23	0.130435	yes
wash	Armadillidium sp.	14	N2	dauer	isoamylalc	H2O	6	12	18	-0.333333	yes
wash	Armadillidium sp.	15	N2	dauer	wash	H2O	14	14	28	0	yes
wash	Armadillidium sp.	15	N2	dauer	isoamylalc	H2O	6	6	12	0	yes
wash	Armadillidium sp.	15	N2	dauer	octanol	H2O	10	11	21	-0.047619	yes
wash	Armadillidium sp.	15	N2	dauer	wash	DMSO	13	31	44	-0.409091	yes
wash	Armadillidium sp.	15	N2	dauer	isoamylalc	DMSO	5	8	13	-0.230769	yes
wash	Armadillidium sp.	15	N2	dauer	octanol	DMSO	8	5	13	0.230769	yes
wash	Armadillidium sp.	15	N2	dauer	wash	EtOH	7	7	14	0	yes
wash	Armadillidium sp.	15	N2	dauer	isoamylalc	EtOH	9	13	22	-0.181818	yes
wash	Armadillidium sp.	15	N2	dauer	octanol	EtOH	15	15	30	0	yes
wash	Armadillidium sp.	16	N2	dauer	wash	H2O	6	8	14	-0.142857	yes
wash	Armadillidium sp.	16	N2	dauer	isoamylalc	H2O	11	7	18	0.222222	yes
wash	Armadillidium sp.	16	N2	dauer	octanol	H2O	14	11	25	0.12	yes
wash	Armadillidium sp.	16	N2	dauer	wash	DMSO	6	4	10	0.2	yes
wash	Armadillidium sp.	16	N2	dauer	isoamylalc	DMSO	5	4	9	NA	no	threshold not reached, exclude
wash	Armadillidium sp.	16	N2	dauer	octanol	DMSO	9	9	18	0	yes
wash	Armadillidium sp.	16	N2	dauer	wash	EtOH	6	8	14	-0.142857	yes
wash	Armadillidium sp.	16	N2	dauer	isoamylalc	EtOH	2	8	10	-0.6	yes
wash	Armadillidium sp.	16	N2	dauer	octanol	EtOH	7	6	13	0.0769231	yes
wash	Armadillidium sp.	17	N2	dauer	wash	H2O	6	10	16	-0.25	yes
wash	Armadillidium sp.	17	N2	dauer	isoamylalc	H2O	5	18	23	-0.565217	yes
wash	Armadillidium sp.	17	N2	dauer	octanol	H2O	9	13	22	-0.181818	yes
wash	Armadillidium sp.	17	N2	dauer	wash	DMSO	7	6	13	0.0769231	yes
wash	Armadillidium sp.	17	N2	dauer	isoamylalc	DMSO	12	5	17	0.411765	yes
wash	Armadillidium sp.	17	N2	dauer	octanol	DMSO	16	21	37	-0.135135	yes
wash	Armadillidium sp.	17	N2	dauer	wash	EtOH	6	6	12	0	yes
wash	Armadillidium sp.	17	N2	dauer	isoamylalc	EtOH	15	3	18	0.666667	yes
wash	Armadillidium sp.	17	N2	dauer	octanol	EtOH	16	12	28	0.142857	yes
wash	Armadillidium sp.	18	N2	dauer	wash	H2O	7	5	12	0.166667	yes
wash	Armadillidium sp.	18	N2	dauer	isoamylalc	H2O	8	14	22	-0.272727	yes
wash	Armadillidium sp.	18	N2	dauer	octanol	H2O	5	6	11	-0.0909091	yes
wash	Armadillidium sp.	18	N2	dauer	wash	DMSO	11	9	20	0.1	yes
wash	Armadillidium sp.	18	N2	dauer	isoamylalc	DMSO	5	8	13	-0.230769	yes
wash	Armadillidium sp.	18	N2	dauer	octanol	DMSO	6	5	11	0.0909091	yes
wash	Armadillidium sp.	18	N2	dauer	wash	EtOH	5	6	11	-0.0909091	yes
wash	Armadillidium sp.	18	N2	dauer	isoamylalc	EtOH	9	5	14	0.285714	yes
wash	Armadillidium sp.	18	N2	dauer	octanol	EtOH	5	9	14	-0.285714	yes
wash	Armadillidium sp.	19	MY2079	dauer	octanol	DMSO	46	61	107	-0.140187	yes
wash	Armadillidium sp.	19	MY2079	dauer	wash	DMSO	74	83	157	-0.0573248	yes
wash	Armadillidium sp.	19	MY2079	dauer	isoamylalc	DMSO	91	14	105	0.733333	yes
wash	Armadillidium sp.	19	MY2079	dauer	octanol	H2O	65	57	122	0.0655738	yes
wash	Armadillidium sp.	19	MY2079	dauer	wash	H2O	39	41	80	-0.025	yes
wash	Armadillidium sp.	19	MY2079	dauer	isoamylalc	H2O	122	36	158	0.544304	yes
wash	Armadillidium sp.	19	MY2079	dauer	octanol	EtOH	65	68	133	-0.0225564	yes
wash	Armadillidium sp.	19	MY2079	dauer	wash	EtOH	76	66	142	0.0704225	yes
wash	Armadillidium sp.	19	MY2079	dauer	isoamylalc	EtOH	94	21	115	0.634783	yes
wash	Armadillidium sp.	19	N2	dauer	octanol	DMSO	31	28	59	0.0508475	yes
wash	Armadillidium sp.	19	N2	dauer	wash	DMSO	15	18	33	-0.0909091	yes
wash	Armadillidium sp.	19	N2	dauer	isoamylalc	DMSO	12	11	23	0.0434783	yes
wash	Armadillidium sp.	19	N2	dauer	octanol	H2O	26	29	55	-0.0545455	yes
wash	Armadillidium sp.	19	N2	dauer	wash	H2O	13	16	29	-0.103448	yes
wash	Armadillidium sp.	19	N2	dauer	isoamylalc	H2O	26	25	51	0.0196078	yes
wash	Armadillidium sp.	19	N2	dauer	octanol	EtOH	22	31	53	-0.169811	yes
wash	Armadillidium sp.	19	N2	dauer	wash	EtOH	8	7	15	0.0666667	yes
wash	Armadillidium sp.	19	N2	dauer	isoamylalc	EtOH	11	17	28	-0.214286	yes
wash	Armadillidium sp.	20	MY2079	dauer	octanol	DMSO	40	45	85	-0.0588235	yes
wash	Armadillidium sp.	20	MY2079	dauer	wash	DMSO	79	83	162	-0.0246914	yes
wash	Armadillidium sp.	20	MY2079	dauer	isoamylalc	DMSO	155	37	192	0.614583	yes
wash	Armadillidium sp.	20	MY2079	dauer	octanol	H2O	60	101	161	-0.254658	yes
wash	Armadillidium sp.	20	MY2079	dauer	wash	H2O	50	45	95	0.0526316	yes
wash	Armadillidium sp.	20	MY2079	dauer	isoamylalc	H2O	82	17	99	0.656566	yes
wash	Armadillidium sp.	20	MY2079	dauer	octanol	EtOH	31	79	110	-0.436364	yes
wash	Armadillidium sp.	20	MY2079	dauer	wash	EtOH	77	63	140	0.1	yes
wash	Armadillidium sp.	20	MY2079	dauer	isoamylalc	EtOH	102	32	134	0.522388	yes
wash	Armadillidium sp.	20	N2	dauer	octanol	DMSO	29	52	81	-0.283951	yes
wash	Armadillidium sp.	20	N2	dauer	wash	DMSO	37	24	61	0.213115	yes
wash	Armadillidium sp.	20	N2	dauer	isoamylalc	DMSO	26	10	36	0.444444	yes
wash	Armadillidium sp.	20	N2	dauer	octanol	H2O	19	54	73	-0.479452	yes
wash	Armadillidium sp.	20	N2	dauer	wash	H2O	12	21	33	-0.272727	yes
wash	Armadillidium sp.	20	N2	dauer	isoamylalc	H2O	18	12	30	0.2	yes
wash	Armadillidium sp.	20	N2	dauer	octanol	EtOH	38	46	84	-0.0952381	yes
wash	Armadillidium sp.	20	N2	dauer	wash	EtOH	14	16	30	-0.0666667	yes
wash	Armadillidium sp.	20	N2	dauer	isoamylalc	EtOH	50	19	69	0.449275	yes

## Sheet: 1E Lithobius wash L4
assay	invertebrate_species	rep	worm_strain	stage	choice_treat	solvent	count_treat	count_solvent	total	index	include	comments
wash	Luthobius sp.	1	MY2079	L4	isoamylalc	DMSO	123	23	146	0.684932	yes
wash	Luthobius sp.	1	MY2079	L4	isoamylalc	EtOH	56	7	63	0.777778	yes
wash	Luthobius sp.	1	MY2079	L4	isoamylalc	H2O	91	20	111	0.63964	yes
wash	Luthobius sp.	1	MY2079	L4	octanol	DMSO	24	25	49	NA	no	one octanol drop missing, exclude
wash	Luthobius sp.	1	MY2079	L4	octanol	EtOH	5	46	51	-0.803922	yes
wash	Luthobius sp.	1	MY2079	L4	octanol	H2O	10	39	49	-0.591837	yes
wash	Luthobius sp.	1	MY2079	L4	wash	DMSO	19	36	55	-0.309091	yes
wash	Luthobius sp.	1	MY2079	L4	wash	EtOH	29	40	69	-0.15942	yes
wash	Luthobius sp.	1	MY2079	L4	wash	H2O	33	23	56	0.178571	yes
wash	Luthobius sp.	1	N2	L4	isoamylalc	DMSO	89	16	105	0.695238	yes
wash	Luthobius sp.	1	N2	L4	isoamylalc	EtOH	69	19	88	0.568182	yes
wash	Luthobius sp.	1	N2	L4	isoamylalc	H2O	71	16	87	0.632184	yes
wash	Luthobius sp.	1	N2	L4	octanol	DMSO	20	50	70	-0.428571	yes
wash	Luthobius sp.	1	N2	L4	octanol	EtOH	7	64	71	-0.802817	yes
wash	Luthobius sp.	1	N2	L4	octanol	H2O	30	35	65	-0.0769231	yes
wash	Luthobius sp.	1	N2	L4	wash	DMSO	39	33	72	0.0833333	yes
wash	Luthobius sp.	1	N2	L4	wash	EtOH	40	53	93	-0.139785	yes
wash	Luthobius sp.	1	N2	L4	wash	H2O	46	38	84	0.0952381	yes
wash	Luthobius sp.	2	MY2079	L4	isoamylalc	DMSO	59	17	76	0.552632	yes
wash	Luthobius sp.	2	MY2079	L4	isoamylalc	EtOH	45	14	59	0.525424	yes
wash	Luthobius sp.	2	MY2079	L4	isoamylalc	H2O	60	25	85	0.411765	yes
wash	Luthobius sp.	2	MY2079	L4	octanol	DMSO	7	45	52	-0.730769	yes
wash	Luthobius sp.	2	MY2079	L4	octanol	EtOH	6	71	77	-0.844156	yes
wash	Luthobius sp.	2	MY2079	L4	octanol	H2O	8	44	52	-0.692308	yes
wash	Luthobius sp.	2	MY2079	L4	wash	DMSO	74	56	130	0.138462	yes
wash	Luthobius sp.	2	MY2079	L4	wash	EtOH	24	30	54	-0.111111	yes
wash	Luthobius sp.	2	MY2079	L4	wash	H2O	NA	NA	NA	NA	no	worm clump close to center, exclude
wash	Luthobius sp.	2	N2	L4	isoamylalc	DMSO	45	11	56	0.607143	yes
wash	Luthobius sp.	2	N2	L4	isoamylalc	EtOH	39	9	48	0.625	yes
wash	Luthobius sp.	2	N2	L4	isoamylalc	H2O	47	5	52	0.807692	yes
wash	Luthobius sp.	2	N2	L4	octanol	DMSO	5	46	51	-0.803922	yes
wash	Luthobius sp.	2	N2	L4	octanol	EtOH	15	36	51	-0.411765	yes
wash	Luthobius sp.	2	N2	L4	octanol	H2O	7	50	57	-0.754386	yes
wash	Luthobius sp.	2	N2	L4	wash	DMSO	31	25	56	0.107143	yes
wash	Luthobius sp.	2	N2	L4	wash	EtOH	36	25	61	0.180328	yes
wash	Luthobius sp.	2	N2	L4	wash	H2O	34	40	74	-0.0810811	yes
wash	Luthobius sp.	3	MY2079	L4	isoamylalc	DMSO	106	23	129	0.643411	yes
wash	Luthobius sp.	3	MY2079	L4	isoamylalc	EtOH	38	11	49	0.55102	yes
wash	Luthobius sp.	3	MY2079	L4	isoamylalc	H2O	96	15	111	0.72973	yes
wash	Luthobius sp.	3	MY2079	L4	octanol	DMSO	21	46	67	-0.373134	yes
wash	Luthobius sp.	3	MY2079	L4	octanol	EtOH	29	85	114	-0.491228	yes
wash	Luthobius sp.	3	MY2079	L4	octanol	H2O	16	54	70	-0.542857	yes
wash	Luthobius sp.	3	MY2079	L4	wash	DMSO	66	16	82	0.609756	yes
wash	Luthobius sp.	3	MY2079	L4	wash	EtOH	43	67	110	-0.218182	yes
wash	Luthobius sp.	3	MY2079	L4	wash	H2O	60	33	93	0.290323	yes
wash	Luthobius sp.	3	N2	L4	isoamylalc	DMSO	66	0	66	1	yes
wash	Luthobius sp.	3	N2	L4	isoamylalc	EtOH	18	5	23	0.565217	yes
wash	Luthobius sp.	3	N2	L4	isoamylalc	H2O	94	5	99	0.89899	yes
wash	Luthobius sp.	3	N2	L4	octanol	DMSO	5	12	17	-0.411765	yes
wash	Luthobius sp.	3	N2	L4	octanol	EtOH	14	37	51	-0.45098	yes
wash	Luthobius sp.	3	N2	L4	octanol	H2O	6	17	23	-0.478261	yes
wash	Luthobius sp.	3	N2	L4	wash	DMSO	25	18	43	0.162791	yes
wash	Luthobius sp.	3	N2	L4	wash	EtOH	17	19	36	-0.0555556	yes
wash	Luthobius sp.	3	N2	L4	wash	H2O	6	19	25	-0.52	yes
wash	Luthobius sp.	7	MY2079	L4	isoamylalc	DMSO	45	13	58	0.551724	yes
wash	Luthobius sp.	7	MY2079	L4	isoamylalc	EtOH	50	21	71	0.408451	yes
wash	Luthobius sp.	7	MY2079	L4	isoamylalc	H2O	41	15	56	0.464286	yes
wash	Luthobius sp.	7	MY2079	L4	octanol	DMSO	7	51	58	-0.758621	yes
wash	Luthobius sp.	7	MY2079	L4	octanol	EtOH	1	58	59	-0.966102	yes
wash	Luthobius sp.	7	MY2079	L4	octanol	H2O	7	67	74	-0.810811	yes
wash	Luthobius sp.	7	MY2079	L4	wash	DMSO	28	45	73	-0.232877	yes
wash	Luthobius sp.	7	MY2079	L4	wash	EtOH	38	39	77	-0.012987	yes
wash	Luthobius sp.	7	MY2079	L4	wash	H2O	38	44	82	-0.0731707	yes
wash	Luthobius sp.	7	N2	L4	isoamylalc	DMSO	40	4	44	0.818182	yes
wash	Luthobius sp.	7	N2	L4	isoamylalc	EtOH	40	15	55	0.454545	yes
wash	Luthobius sp.	7	N2	L4	isoamylalc	H2O	42	17	59	0.423729	yes
wash	Luthobius sp.	7	N2	L4	octanol	DMSO	7	49	56	-0.75	yes
wash	Luthobius sp.	7	N2	L4	octanol	EtOH	2	36	38	-0.894737	yes
wash	Luthobius sp.	7	N2	L4	octanol	H2O	5	42	47	-0.787234	yes
wash	Luthobius sp.	7	N2	L4	wash	DMSO	36	33	69	0.0434783	yes
wash	Luthobius sp.	7	N2	L4	wash	EtOH	23	30	53	-0.132075	yes
wash	Luthobius sp.	7	N2	L4	wash	H2O	13	35	48	-0.458333	yes
wash	Luthobius sp.	8	MY2079	L4	isoamylalc	DMSO	51	10	61	0.672131	yes
wash	Luthobius sp.	8	MY2079	L4	isoamylalc	EtOH	54	14	68	0.588235	yes
wash	Luthobius sp.	8	MY2079	L4	isoamylalc	H2O	37	13	50	0.48	yes
wash	Luthobius sp.	8	MY2079	L4	octanol	DMSO	14	55	69	-0.594203	yes
wash	Luthobius sp.	8	MY2079	L4	octanol	EtOH	8	91	99	-0.838384	yes
wash	Luthobius sp.	8	MY2079	L4	octanol	H2O	4	8	12	-0.333333	yes
wash	Luthobius sp.	8	MY2079	L4	wash	DMSO	40	32	72	0.111111	yes
wash	Luthobius sp.	8	MY2079	L4	wash	EtOH	25	28	53	-0.0566038	yes
wash	Luthobius sp.	8	MY2079	L4	wash	H2O	23	30	53	-0.132075	yes
wash	Luthobius sp.	8	N2	L4	isoamylalc	DMSO	56	5	61	0.836066	yes
wash	Luthobius sp.	8	N2	L4	isoamylalc	EtOH	21	2	23	0.826087	yes
wash	Luthobius sp.	8	N2	L4	isoamylalc	H2O	41	8	49	0.673469	yes
wash	Luthobius sp.	8	N2	L4	octanol	DMSO	0	12	12	-1	yes
wash	Luthobius sp.	8	N2	L4	octanol	EtOH	2	48	50	-0.92	yes
wash	Luthobius sp.	8	N2	L4	octanol	H2O	15	58	73	-0.589041	yes
wash	Luthobius sp.	8	N2	L4	wash	DMSO	16	8	24	0.333333	yes
wash	Luthobius sp.	8	N2	L4	wash	EtOH	20	25	45	-0.111111	yes
wash	Luthobius sp.	8	N2	L4	wash	H2O	14	18	32	-0.125	yes
wash	Luthobius sp.	9	MY2079	L4	isoamylalc	DMSO	43	14	57	0.508772	yes
wash	Luthobius sp.	9	MY2079	L4	isoamylalc	EtOH	67	20	87	0.54023	yes
wash	Luthobius sp.	9	MY2079	L4	isoamylalc	H2O	50	10	60	0.666667	yes
wash	Luthobius sp.	9	MY2079	L4	octanol	DMSO	6	45	51	-0.764706	yes
wash	Luthobius sp.	9	MY2079	L4	octanol	EtOH	3	46	49	-0.877551	yes
wash	Luthobius sp.	9	MY2079	L4	octanol	H2O	7	42	49	-0.714286	yes
wash	Luthobius sp.	9	MY2079	L4	wash	DMSO	43	32	75	0.146667	yes
wash	Luthobius sp.	9	MY2079	L4	wash	EtOH	31	39	70	-0.114286	yes
wash	Luthobius sp.	9	MY2079	L4	wash	H2O	36	35	71	0.0140845	yes
wash	Luthobius sp.	9	N2	L4	isoamylalc	DMSO	54	24	78	0.384615	yes
wash	Luthobius sp.	9	N2	L4	isoamylalc	EtOH	42	19	61	0.377049	yes
wash	Luthobius sp.	9	N2	L4	isoamylalc	H2O	65	13	78	0.666667	yes
wash	Luthobius sp.	9	N2	L4	octanol	DMSO	4	55	59	-0.864407	yes
wash	Luthobius sp.	9	N2	L4	octanol	EtOH	6	43	49	-0.755102	yes
wash	Luthobius sp.	9	N2	L4	octanol	H2O	5	42	47	-0.787234	yes
wash	Luthobius sp.	9	N2	L4	wash	DMSO	36	30	66	0.0909091	yes
wash	Luthobius sp.	9	N2	L4	wash	EtOH	42	44	86	-0.0232558	yes
wash	Luthobius sp.	9	N2	L4	wash	H2O	30	31	61	-0.0163934	yes
wash	Luthobius sp.	10	MY2079	L4	isoamylalc	DMSO	40	6	46	0.73913	yes
wash	Luthobius sp.	10	MY2079	L4	isoamylalc	EtOH	40	4	44	0.818182	yes
wash	Luthobius sp.	10	MY2079	L4	isoamylalc	H2O	37	9	46	0.608696	yes
wash	Luthobius sp.	10	MY2079	L4	octanol	DMSO	6	45	51	-0.764706	yes
wash	Luthobius sp.	10	MY2079	L4	octanol	EtOH	11	38	49	-0.55102	yes
wash	Luthobius sp.	10	MY2079	L4	octanol	H2O	9	43	52	-0.653846	yes
wash	Luthobius sp.	10	MY2079	L4	wash	DMSO	19	15	34	0.117647	yes
wash	Luthobius sp.	10	MY2079	L4	wash	EtOH	25	23	48	0.0416667	yes
wash	Luthobius sp.	10	MY2079	L4	wash	H2O	23	22	45	0.0222222	yes
wash	Luthobius sp.	10	N2	L4	isoamylalc	DMSO	30	17	47	0.276596	yes
wash	Luthobius sp.	10	N2	L4	isoamylalc	EtOH	40	15	55	0.454545	yes
wash	Luthobius sp.	10	N2	L4	isoamylalc	H2O	26	7	33	0.575758	yes
wash	Luthobius sp.	10	N2	L4	octanol	DMSO	5	32	37	-0.72973	yes
wash	Luthobius sp.	10	N2	L4	octanol	EtOH	4	39	43	-0.813953	yes
wash	Luthobius sp.	10	N2	L4	octanol	H2O	2	43	45	-0.911111	yes
wash	Luthobius sp.	10	N2	L4	wash	DMSO	26	13	39	0.333333	yes
wash	Luthobius sp.	10	N2	L4	wash	EtOH	17	16	33	0.030303	yes
wash	Luthobius sp.	10	N2	L4	wash	H2O	19	19	38	0	yes
wash	Luthobius sp.	11	MY2079	L4	isoamylalc	DMSO	53	17	70	0.514286	yes
wash	Luthobius sp.	11	MY2079	L4	isoamylalc	EtOH	75	24	99	0.515152	yes
wash	Luthobius sp.	11	MY2079	L4	isoamylalc	H2O	78	25	103	0.514563	yes
wash	Luthobius sp.	11	MY2079	L4	octanol	DMSO	24	61	85	-0.435294	yes
wash	Luthobius sp.	11	MY2079	L4	octanol	EtOH	50	55	105	-0.047619	yes
wash	Luthobius sp.	11	MY2079	L4	octanol	H2O	21	45	66	-0.363636	yes
wash	Luthobius sp.	11	MY2079	L4	wash	DMSO	34	41	75	-0.0933333	yes
wash	Luthobius sp.	11	MY2079	L4	wash	EtOH	80	80	160	0	yes
wash	Luthobius sp.	11	MY2079	L4	wash	H2O	53	20	73	0.452055	yes
wash	Luthobius sp.	11	N2	L4	isoamylalc	DMSO	61	6	67	0.820896	yes
wash	Luthobius sp.	11	N2	L4	isoamylalc	EtOH	61	12	73	0.671233	yes
wash	Luthobius sp.	11	N2	L4	isoamylalc	H2O	68	14	82	0.658537	yes
wash	Luthobius sp.	11	N2	L4	octanol	DMSO	6	45	51	-0.764706	yes
wash	Luthobius sp.	11	N2	L4	octanol	EtOH	23	51	74	-0.378378	yes
wash	Luthobius sp.	11	N2	L4	octanol	H2O	10	77	87	-0.770115	yes
wash	Luthobius sp.	11	N2	L4	wash	DMSO	43	47	90	-0.0444444	yes
wash	Luthobius sp.	11	N2	L4	wash	EtOH	50	58	108	-0.0740741	yes
wash	Luthobius sp.	11	N2	L4	wash	H2O	47	43	90	0.0444444	yes
wash	Luthobius sp.	12	MY2079	L4	isoamylalc	DMSO	55	11	66	0.666667	yes
wash	Luthobius sp.	12	MY2079	L4	isoamylalc	EtOH	45	7	52	0.730769	yes
wash	Luthobius sp.	12	MY2079	L4	isoamylalc	H2O	48	13	61	0.57377	yes
wash	Luthobius sp.	12	MY2079	L4	octanol	DMSO	12	40	52	-0.538462	yes
wash	Luthobius sp.	12	MY2079	L4	octanol	EtOH	4	61	65	-0.876923	yes
wash	Luthobius sp.	12	MY2079	L4	octanol	H2O	3	46	49	-0.877551	yes
wash	Luthobius sp.	12	MY2079	L4	wash	DMSO	32	21	53	0.207547	yes
wash	Luthobius sp.	12	MY2079	L4	wash	EtOH	15	39	54	-0.444444	yes
wash	Luthobius sp.	12	MY2079	L4	wash	H2O	24	31	55	-0.127273	yes
wash	Luthobius sp.	12	N2	L4	isoamylalc	DMSO	40	6	46	0.73913	yes
wash	Luthobius sp.	12	N2	L4	isoamylalc	EtOH	43	16	59	0.457627	yes
wash	Luthobius sp.	12	N2	L4	isoamylalc	H2O	59	8	67	0.761194	yes
wash	Luthobius sp.	12	N2	L4	octanol	DMSO	6	38	44	-0.727273	yes
wash	Luthobius sp.	12	N2	L4	octanol	EtOH	3	48	51	-0.882353	yes
wash	Luthobius sp.	12	N2	L4	octanol	H2O	1	56	57	-0.964912	yes
wash	Luthobius sp.	12	N2	L4	wash	DMSO	28	19	47	0.191489	yes
wash	Luthobius sp.	12	N2	L4	wash	EtOH	25	31	56	-0.107143	yes
wash	Luthobius sp.	12	N2	L4	wash	H2O	36	25	61	0.180328	yes
wash	Luthobius sp.	13	MY2079	L4	isoamylalc	DMSO	59	14	73	0.616438	yes
wash	Luthobius sp.	13	MY2079	L4	isoamylalc	EtOH	80	19	99	0.616162	yes
wash	Luthobius sp.	13	MY2079	L4	isoamylalc	H2O	69	13	82	0.682927	yes
wash	Luthobius sp.	13	MY2079	L4	octanol	DMSO	13	41	54	-0.518519	yes
wash	Luthobius sp.	13	MY2079	L4	octanol	EtOH	32	38	70	-0.0857143	yes
wash	Luthobius sp.	13	MY2079	L4	octanol	H2O	22	50	72	-0.388889	yes
wash	Luthobius sp.	13	MY2079	L4	wash	DMSO	35	50	85	-0.176471	yes
wash	Luthobius sp.	13	MY2079	L4	wash	EtOH	40	30	70	0.142857	yes
wash	Luthobius sp.	13	MY2079	L4	wash	H2O	44	34	78	0.128205	yes
wash	Luthobius sp.	13	N2	L4	isoamylalc	DMSO	46	8	54	0.703704	yes
wash	Luthobius sp.	13	N2	L4	isoamylalc	EtOH	37	2	39	0.897436	yes
wash	Luthobius sp.	13	N2	L4	isoamylalc	H2O	73	12	85	0.717647	yes
wash	Luthobius sp.	13	N2	L4	octanol	DMSO	4	46	50	-0.84	yes
wash	Luthobius sp.	13	N2	L4	octanol	EtOH	38	53	91	-0.164835	yes
wash	Luthobius sp.	13	N2	L4	octanol	H2O	17	28	45	-0.244444	yes
wash	Luthobius sp.	13	N2	L4	wash	DMSO	36	38	74	-0.027027	yes
wash	Luthobius sp.	13	N2	L4	wash	EtOH	38	48	86	-0.116279	yes
wash	Luthobius sp.	13	N2	L4	wash	H2O	34	30	64	0.0625	yes
wash	Luthobius sp.	14	MY2079	L4	isoamylalc	DMSO	47	8	55	0.709091	yes
wash	Luthobius sp.	14	MY2079	L4	isoamylalc	EtOH	41	5	46	0.782609	yes
wash	Luthobius sp.	14	MY2079	L4	isoamylalc	H2O	49	5	54	0.814815	yes
wash	Luthobius sp.	14	MY2079	L4	octanol	DMSO	2	34	36	-0.888889	yes
wash	Luthobius sp.	14	MY2079	L4	octanol	EtOH	1	73	74	-0.972973	yes
wash	Luthobius sp.	14	MY2079	L4	octanol	H2O	6	45	51	-0.764706	yes
wash	Luthobius sp.	14	MY2079	L4	wash	DMSO	23	28	51	-0.0980392	yes
wash	Luthobius sp.	14	MY2079	L4	wash	EtOH	21	27	48	-0.125	yes
wash	Luthobius sp.	14	MY2079	L4	wash	H2O	21	18	39	0.0769231	yes
wash	Luthobius sp.	14	N2	L4	isoamylalc	DMSO	33	4	37	0.783784	yes
wash	Luthobius sp.	14	N2	L4	isoamylalc	EtOH	35	5	40	0.75	yes
wash	Luthobius sp.	14	N2	L4	isoamylalc	H2O	38	3	41	0.853659	yes
wash	Luthobius sp.	14	N2	L4	octanol	DMSO	3	30	33	-0.818182	yes
wash	Luthobius sp.	14	N2	L4	octanol	EtOH	3	44	47	-0.87234	yes
wash	Luthobius sp.	14	N2	L4	octanol	H2O	1	27	28	-0.928571	yes
wash	Luthobius sp.	14	N2	L4	wash	DMSO	28	21	49	0.142857	yes
wash	Luthobius sp.	14	N2	L4	wash	EtOH	25	24	49	0.0204082	yes
wash	Luthobius sp.	14	N2	L4	wash	H2O	15	22	37	-0.189189	yes
wash	Luthobius sp.	15	MY2079	L4	isoamylalc	DMSO	113	12	125	0.808	yes
wash	Luthobius sp.	15	MY2079	L4	isoamylalc	EtOH	77	20	97	0.587629	yes
wash	Luthobius sp.	15	MY2079	L4	isoamylalc	H2O	88	13	101	0.742574	yes
wash	Luthobius sp.	15	MY2079	L4	octanol	DMSO	28	52	80	-0.3	yes
wash	Luthobius sp.	15	MY2079	L4	octanol	EtOH	27	57	84	-0.357143	yes
wash	Luthobius sp.	15	MY2079	L4	octanol	H2O	24	87	111	-0.567568	yes
wash	Luthobius sp.	15	MY2079	L4	wash	DMSO	64	58	122	0.0491803	yes
wash	Luthobius sp.	15	MY2079	L4	wash	EtOH	34	31	65	0.0461538	yes
wash	Luthobius sp.	15	MY2079	L4	wash	H2O	51	46	97	0.0515464	yes
wash	Luthobius sp.	15	N2	L4	isoamylalc	DMSO	48	5	53	0.811321	yes
wash	Luthobius sp.	15	N2	L4	isoamylalc	EtOH	50	5	55	0.818182	yes
wash	Luthobius sp.	15	N2	L4	isoamylalc	H2O	49	2	51	0.921569	yes
wash	Luthobius sp.	15	N2	L4	octanol	DMSO	3	46	49	-0.877551	yes
wash	Luthobius sp.	15	N2	L4	octanol	EtOH	12	33	45	-0.466667	yes
wash	Luthobius sp.	15	N2	L4	octanol	H2O	11	55	66	-0.666667	yes
wash	Luthobius sp.	15	N2	L4	wash	DMSO	41	48	89	-0.0786517	yes
wash	Luthobius sp.	15	N2	L4	wash	EtOH	33	44	77	-0.142857	yes
wash	Luthobius sp.	15	N2	L4	wash	H2O	34	38	72	-0.0555556	yes

## Sheet: 1E Lithobius wash dauer
assay	invertebrate_species	rep	worm_strain	stage	choice_treat	solvent	count_treat	count_solvent	total	index	include	comments
wash	Lithobius sp.	1	MY2079	dauer	octanol	DMSO	26	23	49	0.0612245	yes
wash	Lithobius sp.	1	MY2079	dauer	octanol	EtOH	36	25	61	0.180328	yes
wash	Lithobius sp.	1	MY2079	dauer	wash	EtOH	33	32	65	0.0153846	yes
wash	Lithobius sp.	1	MY2079	dauer	isoamylalc	H2O	60	6	66	0.818182	yes
wash	Lithobius sp.	1	MY2079	dauer	octanol	H2O	35	31	66	0.0606061	yes
wash	Lithobius sp.	1	MY2079	dauer	wash	H2O	46	32	78	0.179487	yes
wash	Lithobius sp.	1	MY2079	dauer	wash	DMSO	39	44	83	-0.060241	yes
wash	Lithobius sp.	1	MY2079	dauer	isoamylalc	DMSO	73	16	89	0.640449	yes
wash	Lithobius sp.	1	MY2079	dauer	isoamylalc	EtOH	82	23	105	0.561905	yes
wash	Lithobius sp.	1	N2	dauer	octanol	EtOH	2	0	2	NA	no	threshold not reached, exclude
wash	Lithobius sp.	1	N2	dauer	octanol	DMSO	3	2	5	NA	no	threshold not reached, exclude
wash	Lithobius sp.	1	N2	dauer	octanol	H2O	2	4	6	NA	no	threshold not reached, exclude
wash	Lithobius sp.	1	N2	dauer	wash	DMSO	8	4	12	0.333333	yes
wash	Lithobius sp.	1	N2	dauer	isoamylalc	H2O	11	3	14	0.571429	yes
wash	Lithobius sp.	1	N2	dauer	isoamylalc	EtOH	7	7	14	0	yes
wash	Lithobius sp.	1	N2	dauer	isoamylalc	DMSO	12	3	15	0.6	yes
wash	Lithobius sp.	1	N2	dauer	wash	H2O	7	8	15	-0.0666667	yes
wash	Lithobius sp.	1	N2	dauer	wash	EtOH	8	10	18	-0.111111	yes
wash	Lithobius sp.	2	MY2079	dauer	octanol	EtOH	32	31	63	0.015873	yes
wash	Lithobius sp.	2	MY2079	dauer	octanol	H2O	46	21	67	0.373134	yes
wash	Lithobius sp.	2	MY2079	dauer	isoamylalc	H2O	59	14	73	0.616438	yes
wash	Lithobius sp.	2	MY2079	dauer	isoamylalc	DMSO	56	17	73	0.534247	yes
wash	Lithobius sp.	2	MY2079	dauer	isoamylalc	EtOH	55	18	73	0.506849	yes
wash	Lithobius sp.	2	MY2079	dauer	octanol	DMSO	45	31	76	0.184211	yes
wash	Lithobius sp.	2	MY2079	dauer	wash	EtOH	34	43	77	-0.116883	yes
wash	Lithobius sp.	2	MY2079	dauer	wash	DMSO	30	51	81	-0.259259	yes
wash	Lithobius sp.	2	MY2079	dauer	wash	H2O	43	40	83	0.0361446	yes
wash	Lithobius sp.	2	N2	dauer	octanol	EtOH	0	2	2	NA	no	threshold not reached, exclude
wash	Lithobius sp.	2	N2	dauer	isoamylalc	H2O	5	2	7	NA	no	threshold not reached, exclude
wash	Lithobius sp.	2	N2	dauer	octanol	H2O	5	2	7	NA	no	threshold not reached, exclude
wash	Lithobius sp.	2	N2	dauer	wash	H2O	6	1	7	NA	no	threshold not reached, exclude
wash	Lithobius sp.	2	N2	dauer	wash	EtOH	5	3	8	NA	no	threshold not reached, exclude
wash	Lithobius sp.	2	N2	dauer	octanol	DMSO	1	9	10	-0.8	yes
wash	Lithobius sp.	2	N2	dauer	isoamylalc	DMSO	9	3	12	0.5	yes
wash	Lithobius sp.	2	N2	dauer	wash	DMSO	8	9	17	-0.0588235	yes
wash	Lithobius sp.	2	N2	dauer	isoamylalc	EtOH	12	6	18	0.333333	yes
wash	Lithobius sp.	3	MY2079	dauer	wash	EtOH	33	27	60	0.1	yes
wash	Lithobius sp.	3	MY2079	dauer	octanol	DMSO	40	48	88	-0.0909091	yes
wash	Lithobius sp.	3	MY2079	dauer	wash	H2O	46	60	106	-0.132075	yes
wash	Lithobius sp.	3	MY2079	dauer	isoamylalc	DMSO	94	14	108	0.740741	yes
wash	Lithobius sp.	3	MY2079	dauer	isoamylalc	EtOH	112	24	136	0.647059	yes
wash	Lithobius sp.	3	MY2079	dauer	octanol	EtOH	51	87	138	-0.26087	yes
wash	Lithobius sp.	3	MY2079	dauer	wash	DMSO	78	61	139	0.122302	yes
wash	Lithobius sp.	3	MY2079	dauer	isoamylalc	H2O	112	29	141	0.588652	yes
wash	Lithobius sp.	3	MY2079	dauer	octanol	H2O	64	86	150	-0.146667	yes
wash	Lithobius sp.	3	N2	dauer	wash	DMSO	1	1	2	NA	no	threshold not reached, exclude
wash	Lithobius sp.	3	N2	dauer	octanol	H2O	0	3	3	NA	no	threshold not reached, exclude
wash	Lithobius sp.	3	N2	dauer	octanol	EtOH	1	2	3	NA	no	threshold not reached, exclude
wash	Lithobius sp.	3	N2	dauer	isoamylalc	H2O	5	2	7	NA	no	threshold not reached, exclude
wash	Lithobius sp.	3	N2	dauer	isoamylalc	DMSO	4	6	10	-0.2	yes
wash	Lithobius sp.	3	N2	dauer	isoamylalc	EtOH	4	6	10	-0.2	yes
wash	Lithobius sp.	3	N2	dauer	octanol	DMSO	7	3	10	0.4	yes
wash	Lithobius sp.	3	N2	dauer	wash	EtOH	5	5	10	0	yes
wash	Lithobius sp.	3	N2	dauer	wash	H2O	6	5	11	0.0909091	yes
wash	Lithobius sp.	7	MY2079	dauer	octanol	EtOH	24	53	77	-0.376623	yes
wash	Lithobius sp.	7	MY2079	dauer	octanol	H2O	25	52	77	-0.350649	yes
wash	Lithobius sp.	7	MY2079	dauer	isoamylalc	EtOH	67	24	91	0.472527	yes
wash	Lithobius sp.	7	MY2079	dauer	wash	EtOH	38	53	91	-0.164835	yes
wash	Lithobius sp.	7	MY2079	dauer	isoamylalc	DMSO	56	38	94	0.191489	yes
wash	Lithobius sp.	7	MY2079	dauer	isoamylalc	H2O	69	26	95	0.452632	yes
wash	Lithobius sp.	7	MY2079	dauer	octanol	DMSO	22	81	103	-0.572816	yes
wash	Lithobius sp.	7	MY2079	dauer	wash	DMSO	50	53	103	-0.0291262	yes
wash	Lithobius sp.	7	MY2079	dauer	wash	H2O	70	57	127	0.102362	yes
wash	Lithobius sp.	7	N2	dauer	octanol	EtOH	3	2	5	NA	no	threshold not reached, exclude
wash	Lithobius sp.	7	N2	dauer	isoamylalc	EtOH	3	3	6	NA	no	threshold not reached, exclude
wash	Lithobius sp.	7	N2	dauer	isoamylalc	H2O	6	7	13	-0.0769231	yes
wash	Lithobius sp.	7	N2	dauer	octanol	H2O	9	5	14	0.285714	yes
wash	Lithobius sp.	7	N2	dauer	isoamylalc	DMSO	13	3	16	0.625	yes
wash	Lithobius sp.	7	N2	dauer	octanol	DMSO	4	14	18	-0.555556	yes
wash	Lithobius sp.	7	N2	dauer	wash	EtOH	6	12	18	-0.333333	yes
wash	Lithobius sp.	7	N2	dauer	wash	DMSO	8	15	23	-0.304348	yes
wash	Lithobius sp.	7	N2	dauer	wash	H2O	10	17	27	-0.259259	yes
wash	Lithobius sp.	8	MY2079	dauer	wash	EtOH	21	32	53	-0.207547	yes
wash	Lithobius sp.	8	MY2079	dauer	wash	H2O	19	35	54	-0.296296	yes
wash	Lithobius sp.	8	MY2079	dauer	wash	DMSO	29	28	57	0.0175439	yes
wash	Lithobius sp.	8	MY2079	dauer	isoamylalc	DMSO	52	35	87	0.195402	yes
wash	Lithobius sp.	8	MY2079	dauer	octanol	DMSO	20	67	87	-0.54023	yes
wash	Lithobius sp.	8	MY2079	dauer	octanol	H2O	19	69	88	-0.568182	yes
wash	Lithobius sp.	8	MY2079	dauer	octanol	EtOH	20	69	89	-0.550562	yes
wash	Lithobius sp.	8	MY2079	dauer	isoamylalc	H2O	77	34	111	0.387387	yes
wash	Lithobius sp.	8	MY2079	dauer	isoamylalc	EtOH	86	44	130	0.323077	yes
wash	Lithobius sp.	8	N2	dauer	wash	EtOH	10	6	16	0.25	yes
wash	Lithobius sp.	8	N2	dauer	wash	H2O	3	15	18	-0.666667	yes
wash	Lithobius sp.	8	N2	dauer	octanol	DMSO	8	17	25	-0.36	yes
wash	Lithobius sp.	8	N2	dauer	isoamylalc	EtOH	15	11	26	0.153846	yes
wash	Lithobius sp.	8	N2	dauer	isoamylalc	DMSO	20	7	27	0.481481	yes
wash	Lithobius sp.	8	N2	dauer	isoamylalc	H2O	16	13	29	0.103448	yes
wash	Lithobius sp.	8	N2	dauer	octanol	EtOH	15	22	37	-0.189189	yes
wash	Lithobius sp.	8	N2	dauer	octanol	H2O	21	23	44	-0.0454545	yes
wash	Lithobius sp.	8	N2	dauer	wash	DMSO	34	32	66	0.030303	yes
wash	Lithobius sp.	9	MY2079	dauer	isoamylalc	DMSO	28	0	28	1	yes
wash	Lithobius sp.	9	MY2079	dauer	octanol	H2O	3	32	35	-0.828571	yes
wash	Lithobius sp.	9	MY2079	dauer	wash	EtOH	17	30	47	-0.276596	yes
wash	Lithobius sp.	9	MY2079	dauer	octanol	DMSO	12	36	48	-0.5	yes
wash	Lithobius sp.	9	MY2079	dauer	isoamylalc	H2O	39	10	49	0.591837	yes
wash	Lithobius sp.	9	MY2079	dauer	isoamylalc	EtOH	52	6	58	0.793103	yes
wash	Lithobius sp.	9	MY2079	dauer	wash	DMSO	40	18	58	0.37931	yes
wash	Lithobius sp.	9	MY2079	dauer	octanol	EtOH	24	35	59	-0.186441	yes
wash	Lithobius sp.	9	MY2079	dauer	wash	H2O	30	29	59	0.0169492	yes
wash	Lithobius sp.	9	N2	dauer	octanol	DMSO	0	5	5	NA	no	threshold not reached, exclude
wash	Lithobius sp.	9	N2	dauer	wash	EtOH	6	5	11	0.0909091	yes
wash	Lithobius sp.	9	N2	dauer	octanol	H2O	11	3	14	0.571429	yes
wash	Lithobius sp.	9	N2	dauer	isoamylalc	DMSO	7	8	15	-0.0666667	yes
wash	Lithobius sp.	9	N2	dauer	octanol	EtOH	9	15	24	-0.25	yes
wash	Lithobius sp.	9	N2	dauer	wash	DMSO	10	14	24	-0.166667	yes
wash	Lithobius sp.	9	N2	dauer	wash	H2O	18	9	27	0.333333	yes
wash	Lithobius sp.	9	N2	dauer	isoamylalc	H2O	9	20	29	-0.37931	yes
wash	Lithobius sp.	9	N2	dauer	isoamylalc	EtOH	15	24	39	-0.230769	yes
wash	Lithobius sp.	10	MY2079	dauer	wash	EtOH	29	22	51	0.137255	yes
wash	Lithobius sp.	10	MY2079	dauer	octanol	DMSO	15	38	53	-0.433962	yes
wash	Lithobius sp.	10	MY2079	dauer	wash	H2O	30	28	58	0.0344828	yes
wash	Lithobius sp.	10	MY2079	dauer	isoamylalc	DMSO	60	5	65	0.846154	yes
wash	Lithobius sp.	10	MY2079	dauer	isoamylalc	H2O	61	4	65	0.876923	yes
wash	Lithobius sp.	10	MY2079	dauer	wash	DMSO	33	36	69	-0.0434783	yes
wash	Lithobius sp.	10	MY2079	dauer	octanol	H2O	30	41	71	-0.15493	yes
wash	Lithobius sp.	10	MY2079	dauer	isoamylalc	EtOH	60	12	72	0.666667	yes
wash	Lithobius sp.	10	MY2079	dauer	octanol	EtOH	39	60	99	-0.212121	yes
wash	Lithobius sp.	10	N2	dauer	octanol	H2O	5	6	11	-0.0909091	yes
wash	Lithobius sp.	10	N2	dauer	wash	EtOH	13	11	24	0.0833333	yes
wash	Lithobius sp.	10	N2	dauer	wash	DMSO	17	8	25	0.36	yes
wash	Lithobius sp.	10	N2	dauer	wash	H2O	16	12	28	0.142857	yes
wash	Lithobius sp.	10	N2	dauer	isoamylalc	H2O	27	12	39	0.384615	yes
wash	Lithobius sp.	10	N2	dauer	isoamylalc	EtOH	31	16	47	0.319149	yes
wash	Lithobius sp.	10	N2	dauer	octanol	DMSO	16	33	49	-0.346939	yes
wash	Lithobius sp.	10	N2	dauer	octanol	EtOH	21	31	52	-0.192308	yes
wash	Lithobius sp.	10	N2	dauer	isoamylalc	DMSO	43	12	55	0.563636	yes
wash	Lithobius sp.	11	MY2079	dauer	isoamylalc	H2O	34	9	43	0.581395	yes
wash	Lithobius sp.	11	MY2079	dauer	octanol	DMSO	25	33	58	-0.137931	yes
wash	Lithobius sp.	11	MY2079	dauer	wash	EtOH	31	37	68	-0.0882353	yes
wash	Lithobius sp.	11	MY2079	dauer	isoamylalc	EtOH	66	11	77	0.714286	yes
wash	Lithobius sp.	11	MY2079	dauer	wash	H2O	40	40	80	0	yes
wash	Lithobius sp.	11	MY2079	dauer	octanol	H2O	36	49	85	-0.152941	yes
wash	Lithobius sp.	11	MY2079	dauer	isoamylalc	DMSO	78	17	95	0.642105	yes
wash	Lithobius sp.	11	MY2079	dauer	octanol	EtOH	36	65	101	-0.287129	yes
wash	Lithobius sp.	11	MY2079	dauer	wash	DMSO	51	50	101	0.00990099	yes
wash	Lithobius sp.	11	N2	dauer	wash	EtOH	4	2	6	NA	no	threshold not reached, exclude
wash	Lithobius sp.	11	N2	dauer	octanol	EtOH	4	3	7	NA	no	threshold not reached, exclude
wash	Lithobius sp.	11	N2	dauer	isoamylalc	EtOH	10	1	11	0.818182	yes
wash	Lithobius sp.	11	N2	dauer	octanol	DMSO	7	4	11	0.272727	yes
wash	Lithobius sp.	11	N2	dauer	isoamylalc	H2O	8	3	11	0.454545	yes
wash	Lithobius sp.	11	N2	dauer	wash	H2O	3	8	11	-0.454545	yes
wash	Lithobius sp.	11	N2	dauer	octanol	H2O	4	9	13	-0.384615	yes
wash	Lithobius sp.	11	N2	dauer	isoamylalc	DMSO	8	9	17	-0.0588235	yes
wash	Lithobius sp.	11	N2	dauer	wash	DMSO	15	11	26	0.153846	yes
wash	Lithobius sp.	12	MY2079	dauer	octanol	EtOH	15	20	35	-0.142857	yes
wash	Lithobius sp.	12	MY2079	dauer	wash	EtOH	22	19	41	0.0731707	yes
wash	Lithobius sp.	12	MY2079	dauer	wash	DMSO	22	20	42	0.047619	yes
wash	Lithobius sp.	12	MY2079	dauer	octanol	DMSO	16	27	43	-0.255814	yes
wash	Lithobius sp.	12	MY2079	dauer	wash	H2O	21	25	46	-0.0869565	yes
wash	Lithobius sp.	12	MY2079	dauer	octanol	H2O	17	30	47	-0.276596	yes
wash	Lithobius sp.	12	MY2079	dauer	isoamylalc	H2O	32	16	48	0.333333	yes
wash	Lithobius sp.	12	MY2079	dauer	isoamylalc	DMSO	40	20	60	0.333333	yes
wash	Lithobius sp.	12	MY2079	dauer	isoamylalc	EtOH	42	21	63	0.333333	yes
wash	Lithobius sp.	12	N2	dauer	octanol	DMSO	4	5	9	NA	no	threshold not reached, exclude
wash	Lithobius sp.	12	N2	dauer	wash	DMSO	4	6	10	-0.2	yes
wash	Lithobius sp.	12	N2	dauer	isoamylalc	EtOH	5	5	10	0	yes
wash	Lithobius sp.	12	N2	dauer	isoamylalc	H2O	6	4	10	0.2	yes
wash	Lithobius sp.	12	N2	dauer	isoamylalc	DMSO	9	2	11	0.636364	yes
wash	Lithobius sp.	12	N2	dauer	wash	H2O	6	8	14	-0.142857	yes
wash	Lithobius sp.	12	N2	dauer	octanol	EtOH	7	8	15	-0.0666667	yes
wash	Lithobius sp.	12	N2	dauer	octanol	H2O	5	13	18	-0.444444	yes
wash	Lithobius sp.	12	N2	dauer	wash	EtOH	13	17	30	-0.133333	yes
wash	Lithobius sp.	13	MY2079	dauer	wash	DMSO	20	11	31	0.290323	yes
wash	Lithobius sp.	13	MY2079	dauer	wash	EtOH	23	14	37	0.243243	yes
wash	Lithobius sp.	13	MY2079	dauer	wash	H2O	30	12	42	0.428571	yes
wash	Lithobius sp.	13	MY2079	dauer	octanol	DMSO	25	18	43	0.162791	yes
wash	Lithobius sp.	13	MY2079	dauer	octanol	EtOH	24	32	56	-0.142857	yes
wash	Lithobius sp.	13	MY2079	dauer	isoamylalc	H2O	65	13	78	0.666667	yes
wash	Lithobius sp.	13	MY2079	dauer	octanol	H2O	34	45	79	-0.139241	yes
wash	Lithobius sp.	13	MY2079	dauer	isoamylalc	DMSO	77	19	96	0.604167	yes
wash	Lithobius sp.	13	MY2079	dauer	isoamylalc	EtOH	95	18	113	0.681416	yes
wash	Lithobius sp.	13	N2	dauer	isoamylalc	H2O	7	2	9	NA	no	threshold not reached, exclude
wash	Lithobius sp.	13	N2	dauer	wash	H2O	5	5	10	0	yes
wash	Lithobius sp.	13	N2	dauer	wash	EtOH	7	4	11	0.272727	yes
wash	Lithobius sp.	13	N2	dauer	isoamylalc	EtOH	8	3	11	0.454545	yes
wash	Lithobius sp.	13	N2	dauer	octanol	EtOH	5	8	13	-0.230769	yes
wash	Lithobius sp.	13	N2	dauer	octanol	H2O	6	9	15	-0.2	yes
wash	Lithobius sp.	13	N2	dauer	wash	DMSO	6	11	17	-0.294118	yes
wash	Lithobius sp.	13	N2	dauer	isoamylalc	DMSO	18	8	26	0.384615	yes
wash	Lithobius sp.	13	N2	dauer	octanol	DMSO	15	13	28	0.0714286	yes
wash	Lithobius sp.	14	MY2079	dauer	octanol	DMSO	31	99	130	-0.523077	yes
wash	Lithobius sp.	14	MY2079	dauer	wash	DMSO	57	57	114	0	yes
wash	Lithobius sp.	14	MY2079	dauer	isoamylalc	DMSO	52	34	86	0.209302	yes
wash	Lithobius sp.	14	MY2079	dauer	octanol	EtOH	21	95	116	-0.637931	yes
wash	Lithobius sp.	14	MY2079	dauer	wash	EtOH	44	43	87	0.0114943	yes
wash	Lithobius sp.	14	MY2079	dauer	isoamylalc	EtOH	55	27	82	0.341463	yes
wash	Lithobius sp.	14	MY2079	dauer	octanol	H2O	10	94	104	-0.807692	yes
wash	Lithobius sp.	14	MY2079	dauer	wash	H2O	45	48	93	-0.0322581	yes
wash	Lithobius sp.	14	MY2079	dauer	isoamylalc	H2O	46	28	74	0.243243	yes
wash	Lithobius sp.	14	N2	dauer	octanol	DMSO	38	52	90	-0.155556	yes
wash	Lithobius sp.	14	N2	dauer	wash	DMSO	19	21	40	-0.05	yes
wash	Lithobius sp.	14	N2	dauer	isoamylalc	DMSO	54	25	79	0.367089	yes
wash	Lithobius sp.	14	N2	dauer	octanol	EtOH	47	55	102	-0.0784314	yes
wash	Lithobius sp.	14	N2	dauer	wash	EtOH	27	17	44	0.227273	yes
wash	Lithobius sp.	14	N2	dauer	isoamylalc	EtOH	64	27	91	0.406593	yes
wash	Lithobius sp.	14	N2	dauer	octanol	H2O	26	46	72	-0.277778	yes
wash	Lithobius sp.	14	N2	dauer	wash	H2O	31	25	56	0.107143	yes
wash	Lithobius sp.	14	N2	dauer	isoamylalc	H2O	65	24	89	0.460674	yes
wash	Lithobius sp.	15	MY2079	dauer	octanol	DMSO	73	130	203	-0.280788	yes
wash	Lithobius sp.	15	MY2079	dauer	wash	DMSO	129	118	247	0.0445344	yes
wash	Lithobius sp.	15	MY2079	dauer	isoamylalc	DMSO	152	89	241	0.261411	yes
wash	Lithobius sp.	15	MY2079	dauer	octanol	EtOH	38	75	113	-0.327434	yes
wash	Lithobius sp.	15	MY2079	dauer	wash	EtOH	103	82	185	0.113514	yes
wash	Lithobius sp.	15	MY2079	dauer	isoamylalc	EtOH	114	70	184	0.23913	yes
wash	Lithobius sp.	15	MY2079	dauer	octanol	H2O	102	138	240	-0.15	yes
wash	Lithobius sp.	15	MY2079	dauer	wash	H2O	73	53	126	0.15873	yes
wash	Lithobius sp.	15	MY2079	dauer	isoamylalc	H2O	109	90	199	0.0954774	yes
wash	Lithobius sp.	15	N2	dauer	octanol	DMSO	30	30	60	0	yes
wash	Lithobius sp.	15	N2	dauer	wash	DMSO	42	55	97	-0.134021	yes
wash	Lithobius sp.	15	N2	dauer	isoamylalc	DMSO	54	38	92	0.173913	yes
wash	Lithobius sp.	15	N2	dauer	octanol	EtOH	40	46	86	-0.0697674	yes
wash	Lithobius sp.	15	N2	dauer	wash	EtOH	59	43	102	0.156863	yes
wash	Lithobius sp.	15	N2	dauer	isoamylalc	EtOH	31	20	51	0.215686	yes
wash	Lithobius sp.	15	N2	dauer	octanol	H2O	39	48	87	-0.103448	yes
wash	Lithobius sp.	15	N2	dauer	wash	H2O	26	38	64	-0.1875	yes
wash	Lithobius sp.	15	N2	dauer	isoamylalc	H2O	49	38	87	0.126437	yes

## Sheet: 1F D. melanogaster wash L4
assay	invertebrate_species	rep	worm_strain	stage	choice_treat	solvent	count_treat	count_solvent	total	index	include	comments
wash	Drosophila melanogaster	1	MY2079	L4	isoamylalc	H2O	82	19	101	0.623762	yes
wash	Drosophila melanogaster	1	MY2079	L4	isoamylalc	EtOH	57	17	74	0.540541	yes
wash	Drosophila melanogaster	1	MY2079	L4	isoamylalc	DMSO	92	23	115	0.6	yes
wash	Drosophila melanogaster	1	MY2079	L4	octanol	H2O	22	56	78	-0.435897	yes
wash	Drosophila melanogaster	1	MY2079	L4	octanol	EtOH	6	81	87	-0.862069	yes
wash	Drosophila melanogaster	1	MY2079	L4	octanol	DMSO	10	53	63	-0.68254	yes
wash	Drosophila melanogaster	1	MY2079	L4	wash	H2O	30	28	58	0.0344828	yes
wash	Drosophila melanogaster	1	MY2079	L4	wash	EtOH	31	43	74	-0.162162	yes
wash	Drosophila melanogaster	1	MY2079	L4	wash	DMSO	40	27	67	0.19403	yes
wash	Drosophila melanogaster	1	N2	L4	isoamylalc	H2O	68	9	77	0.766234	yes
wash	Drosophila melanogaster	1	N2	L4	isoamylalc	EtOH	84	21	105	0.6	yes
wash	Drosophila melanogaster	1	N2	L4	isoamylalc	DMSO	68	11	79	0.721519	yes
wash	Drosophila melanogaster	1	N2	L4	octanol	H2O	8	43	51	-0.686275	yes
wash	Drosophila melanogaster	1	N2	L4	octanol	EtOH	6	40	46	-0.73913	yes
wash	Drosophila melanogaster	1	N2	L4	octanol	DMSO	5	41	46	-0.782609	yes
wash	Drosophila melanogaster	1	N2	L4	wash	H2O	42	30	72	0.166667	yes
wash	Drosophila melanogaster	1	N2	L4	wash	EtOH	32	33	65	-0.0153846	yes
wash	Drosophila melanogaster	1	N2	L4	wash	DMSO	32	34	66	-0.030303	yes
wash	Drosophila melanogaster	2	MY2079	L4	isoamylalc	H2O	47	10	57	0.649123	yes
wash	Drosophila melanogaster	2	MY2079	L4	isoamylalc	EtOH	68	22	90	0.511111	yes
wash	Drosophila melanogaster	2	MY2079	L4	isoamylalc	DMSO	80	24	104	0.538462	yes
wash	Drosophila melanogaster	2	MY2079	L4	octanol	H2O	11	75	86	-0.744186	yes
wash	Drosophila melanogaster	2	MY2079	L4	octanol	EtOH	9	60	69	-0.73913	yes
wash	Drosophila melanogaster	2	MY2079	L4	octanol	DMSO	6	45	51	-0.764706	yes
wash	Drosophila melanogaster	2	MY2079	L4	wash	H2O	26	19	45	0.155556	yes
wash	Drosophila melanogaster	2	MY2079	L4	wash	EtOH	15	16	31	-0.0322581	yes
wash	Drosophila melanogaster	2	MY2079	L4	wash	DMSO	22	34	56	-0.214286	yes
wash	Drosophila melanogaster	2	N2	L4	isoamylalc	H2O	57	9	66	0.727273	yes
wash	Drosophila melanogaster	2	N2	L4	isoamylalc	EtOH	79	11	90	0.755556	yes
wash	Drosophila melanogaster	2	N2	L4	isoamylalc	DMSO	86	12	98	0.755102	yes
wash	Drosophila melanogaster	2	N2	L4	octanol	H2O	8	28	36	-0.555556	yes
wash	Drosophila melanogaster	2	N2	L4	octanol	EtOH	2	24	26	-0.846154	yes
wash	Drosophila melanogaster	2	N2	L4	octanol	DMSO	NA	NA	NA	NA	no	no data available, exclude
wash	Drosophila melanogaster	2	N2	L4	wash	H2O	24	29	53	-0.0943396	yes
wash	Drosophila melanogaster	2	N2	L4	wash	EtOH	33	30	63	0.047619	yes
wash	Drosophila melanogaster	2	N2	L4	wash	DMSO	35	30	65	0.0769231	yes
wash	Drosophila melanogaster	3	MY2079	L4	isoamylalc	H2O	73	10	83	0.759036	yes
wash	Drosophila melanogaster	3	MY2079	L4	isoamylalc	EtOH	66	12	78	0.692308	yes
wash	Drosophila melanogaster	3	MY2079	L4	isoamylalc	DMSO	51	10	61	0.672131	yes
wash	Drosophila melanogaster	3	MY2079	L4	octanol	H2O	5	65	70	-0.857143	yes
wash	Drosophila melanogaster	3	MY2079	L4	octanol	EtOH	3	81	84	-0.928571	yes
wash	Drosophila melanogaster	3	MY2079	L4	octanol	DMSO	16	53	69	-0.536232	yes
wash	Drosophila melanogaster	3	MY2079	L4	wash	H2O	46	51	97	-0.0515464	yes
wash	Drosophila melanogaster	3	MY2079	L4	wash	EtOH	74	45	119	0.243697	yes
wash	Drosophila melanogaster	3	MY2079	L4	wash	DMSO	49	58	107	-0.0841121	yes
wash	Drosophila melanogaster	3	N2	L4	isoamylalc	H2O	88	29	117	0.504274	yes
wash	Drosophila melanogaster	3	N2	L4	isoamylalc	EtOH	80	19	99	0.616162	yes
wash	Drosophila melanogaster	3	N2	L4	isoamylalc	DMSO	68	6	74	0.837838	yes
wash	Drosophila melanogaster	3	N2	L4	octanol	H2O	22	74	96	-0.541667	yes
wash	Drosophila melanogaster	3	N2	L4	octanol	EtOH	3	22	25	-0.76	yes
wash	Drosophila melanogaster	3	N2	L4	octanol	DMSO	5	10	15	-0.333333	yes
wash	Drosophila melanogaster	3	N2	L4	wash	H2O	40	53	93	-0.139785	yes
wash	Drosophila melanogaster	3	N2	L4	wash	EtOH	52	44	96	0.0833333	yes
wash	Drosophila melanogaster	3	N2	L4	wash	DMSO	73	73	146	0	yes
wash	Drosophila melanogaster	4	MY2079	L4	isoamylalc	H2O	29	7	36	0.611111	yes
wash	Drosophila melanogaster	4	MY2079	L4	isoamylalc	EtOH	52	14	66	0.575758	yes
wash	Drosophila melanogaster	4	MY2079	L4	isoamylalc	DMSO	38	3	41	0.853659	yes
wash	Drosophila melanogaster	4	MY2079	L4	octanol	H2O	6	70	76	-0.842105	yes
wash	Drosophila melanogaster	4	MY2079	L4	octanol	EtOH	2	52	54	-0.925926	yes
wash	Drosophila melanogaster	4	MY2079	L4	octanol	DMSO	10	60	70	-0.714286	yes
wash	Drosophila melanogaster	4	MY2079	L4	wash	H2O	37	42	79	-0.0632911	yes
wash	Drosophila melanogaster	4	MY2079	L4	wash	EtOH	64	57	121	0.0578512	yes
wash	Drosophila melanogaster	4	MY2079	L4	wash	DMSO	37	41	78	-0.0512821	yes
wash	Drosophila melanogaster	4	N2	L4	isoamylalc	H2O	60	5	65	0.846154	yes
wash	Drosophila melanogaster	4	N2	L4	isoamylalc	EtOH	99	13	112	0.767857	yes
wash	Drosophila melanogaster	4	N2	L4	isoamylalc	DMSO	61	12	73	0.671233	yes
wash	Drosophila melanogaster	4	N2	L4	octanol	H2O	4	36	40	-0.8	yes
wash	Drosophila melanogaster	4	N2	L4	octanol	EtOH	9	39	48	-0.625	yes
wash	Drosophila melanogaster	4	N2	L4	octanol	DMSO	5	48	53	-0.811321	yes
wash	Drosophila melanogaster	4	N2	L4	wash	H2O	24	25	49	-0.0204082	yes
wash	Drosophila melanogaster	4	N2	L4	wash	EtOH	15	20	35	-0.142857	yes
wash	Drosophila melanogaster	4	N2	L4	wash	DMSO	12	23	35	-0.314286	yes
wash	Drosophila melanogaster	5	MY2079	L4	isoamylalc	DMSO	49	14	63	0.555556	yes
wash	Drosophila melanogaster	5	MY2079	L4	isoamylalc	H2O	77	12	89	0.730337	yes
wash	Drosophila melanogaster	5	MY2079	L4	isoamylalc	EtOH	61	26	87	0.402299	yes
wash	Drosophila melanogaster	5	MY2079	L4	octanol	DMSO	26	47	73	-0.287671	yes
wash	Drosophila melanogaster	5	MY2079	L4	octanol	H2O	24	39	63	-0.238095	yes
wash	Drosophila melanogaster	5	MY2079	L4	octanol	EtOH	32	43	75	-0.146667	yes
wash	Drosophila melanogaster	5	MY2079	L4	wash	DMSO	25	24	49	0.0204082	yes
wash	Drosophila melanogaster	5	MY2079	L4	wash	H2O	30	29	59	0.0169492	yes
wash	Drosophila melanogaster	5	MY2079	L4	wash	EtOH	53	67	120	-0.116667	yes
wash	Drosophila melanogaster	5	N2	L4	isoamylalc	DMSO	38	10	48	0.583333	yes
wash	Drosophila melanogaster	5	N2	L4	isoamylalc	H2O	68	11	79	0.721519	yes
wash	Drosophila melanogaster	5	N2	L4	isoamylalc	EtOH	33	10	43	0.534884	yes
wash	Drosophila melanogaster	5	N2	L4	octanol	DMSO	8	24	32	-0.5	yes
wash	Drosophila melanogaster	5	N2	L4	octanol	H2O	9	26	35	-0.485714	yes
wash	Drosophila melanogaster	5	N2	L4	octanol	EtOH	8	34	42	-0.619048	yes
wash	Drosophila melanogaster	5	N2	L4	wash	DMSO	23	13	36	0.277778	yes
wash	Drosophila melanogaster	5	N2	L4	wash	H2O	17	30	47	-0.276596	yes
wash	Drosophila melanogaster	5	N2	L4	wash	EtOH	30	21	51	0.176471	yes
wash	Drosophila melanogaster	6	MY2079	L4	isoamylalc	DMSO	68	18	86	0.581395	yes
wash	Drosophila melanogaster	6	MY2079	L4	isoamylalc	H2O	47	25	72	0.305556	yes
wash	Drosophila melanogaster	6	MY2079	L4	isoamylalc	EtOH	64	23	87	0.471264	yes
wash	Drosophila melanogaster	6	MY2079	L4	octanol	DMSO	29	60	89	-0.348315	yes
wash	Drosophila melanogaster	6	MY2079	L4	octanol	H2O	42	78	120	-0.3	yes
wash	Drosophila melanogaster	6	MY2079	L4	octanol	EtOH	30	50	80	-0.25	yes
wash	Drosophila melanogaster	6	MY2079	L4	wash	DMSO	34	41	75	-0.0933333	yes
wash	Drosophila melanogaster	6	MY2079	L4	wash	H2O	33	25	58	0.137931	yes
wash	Drosophila melanogaster	6	MY2079	L4	wash	EtOH	42	47	89	-0.0561798	yes
wash	Drosophila melanogaster	6	N2	L4	isoamylalc	DMSO	50	13	63	0.587302	yes
wash	Drosophila melanogaster	6	N2	L4	isoamylalc	H2O	55	16	71	0.549296	yes
wash	Drosophila melanogaster	6	N2	L4	isoamylalc	EtOH	43	11	54	0.592593	yes
wash	Drosophila melanogaster	6	N2	L4	octanol	DMSO	9	33	42	-0.571429	yes
wash	Drosophila melanogaster	6	N2	L4	octanol	H2O	10	27	37	-0.459459	yes
wash	Drosophila melanogaster	6	N2	L4	octanol	EtOH	8	56	64	-0.75	yes
wash	Drosophila melanogaster	6	N2	L4	wash	DMSO	33	30	63	0.047619	yes
wash	Drosophila melanogaster	6	N2	L4	wash	H2O	21	30	51	-0.176471	yes
wash	Drosophila melanogaster	6	N2	L4	wash	EtOH	41	47	88	-0.0681818	yes
wash	Drosophila melanogaster	7	MY2079	L4	isoamylalc	EtOH	69	28	97	0.42268	yes
wash	Drosophila melanogaster	7	MY2079	L4	isoamylalc	H2O	45	19	64	0.40625	yes
wash	Drosophila melanogaster	7	MY2079	L4	isoamylalc	DMSO	51	70	121	-0.157025	yes
wash	Drosophila melanogaster	7	MY2079	L4	octanol	EtOH	7	27	34	-0.588235	yes
wash	Drosophila melanogaster	7	MY2079	L4	octanol	H2O	9	55	64	-0.71875	yes
wash	Drosophila melanogaster	7	MY2079	L4	octanol	DMSO	7	42	49	-0.714286	yes
wash	Drosophila melanogaster	7	MY2079	L4	wash	EtOH	35	32	67	0.0447761	yes
wash	Drosophila melanogaster	7	MY2079	L4	wash	H2O	34	23	57	0.192982	yes
wash	Drosophila melanogaster	7	MY2079	L4	wash	DMSO	35	36	71	-0.0140845	yes
wash	Drosophila melanogaster	7	N2	L4	isoamylalc	EtOH	42	17	59	0.423729	yes
wash	Drosophila melanogaster	7	N2	L4	isoamylalc	H2O	22	4	26	0.692308	yes
wash	Drosophila melanogaster	7	N2	L4	isoamylalc	DMSO	24	11	35	0.371429	yes
wash	Drosophila melanogaster	7	N2	L4	octanol	EtOH	7	22	29	-0.517241	yes
wash	Drosophila melanogaster	7	N2	L4	octanol	H2O	4	16	20	-0.6	yes
wash	Drosophila melanogaster	7	N2	L4	octanol	DMSO	4	18	22	-0.636364	yes
wash	Drosophila melanogaster	7	N2	L4	wash	EtOH	32	29	61	0.0491803	yes
wash	Drosophila melanogaster	7	N2	L4	wash	H2O	23	19	42	0.0952381	yes
wash	Drosophila melanogaster	7	N2	L4	wash	DMSO	25	20	45	0.111111	yes
wash	Drosophila melanogaster	8	MY2079	L4	isoamylalc	EtOH	61	34	95	0.284211	yes
wash	Drosophila melanogaster	8	MY2079	L4	isoamylalc	H2O	96	17	113	0.699115	yes
wash	Drosophila melanogaster	8	MY2079	L4	isoamylalc	DMSO	86	57	143	0.202797	yes
wash	Drosophila melanogaster	8	MY2079	L4	octanol	EtOH	14	51	65	-0.569231	yes
wash	Drosophila melanogaster	8	MY2079	L4	octanol	H2O	4	63	67	-0.880597	yes
wash	Drosophila melanogaster	8	MY2079	L4	octanol	DMSO	6	63	69	-0.826087	yes
wash	Drosophila melanogaster	8	MY2079	L4	wash	EtOH	51	37	88	0.159091	yes
wash	Drosophila melanogaster	8	MY2079	L4	wash	H2O	44	36	80	0.1	yes
wash	Drosophila melanogaster	8	MY2079	L4	wash	DMSO	24	21	45	0.0666667	yes
wash	Drosophila melanogaster	8	N2	L4	isoamylalc	EtOH	31	9	40	0.55	yes
wash	Drosophila melanogaster	8	N2	L4	isoamylalc	H2O	19	7	26	0.461538	yes
wash	Drosophila melanogaster	8	N2	L4	isoamylalc	DMSO	11	11	22	0	yes
wash	Drosophila melanogaster	8	N2	L4	octanol	EtOH	3	22	25	-0.76	yes
wash	Drosophila melanogaster	8	N2	L4	octanol	H2O	3	15	18	-0.666667	yes
wash	Drosophila melanogaster	8	N2	L4	octanol	DMSO	4	35	39	-0.794872	yes
wash	Drosophila melanogaster	8	N2	L4	wash	EtOH	11	14	25	-0.12	yes
wash	Drosophila melanogaster	8	N2	L4	wash	H2O	10	13	23	-0.130435	yes
wash	Drosophila melanogaster	8	N2	L4	wash	DMSO	19	13	32	0.1875	yes
wash	Drosophila melanogaster	9	MY2079	L4	isoamylalc	EtOH	53	29	82	0.292683	yes
wash	Drosophila melanogaster	9	MY2079	L4	isoamylalc	DMSO	48	18	66	0.454545	yes
wash	Drosophila melanogaster	9	MY2079	L4	isoamylalc	H2O	66	20	86	0.534884	yes
wash	Drosophila melanogaster	9	MY2079	L4	octanol	EtOH	4	92	96	-0.916667	yes
wash	Drosophila melanogaster	9	MY2079	L4	octanol	DMSO	2	73	75	-0.946667	yes
wash	Drosophila melanogaster	9	MY2079	L4	octanol	H2O	10	100	110	-0.818182	yes
wash	Drosophila melanogaster	9	MY2079	L4	wash	EtOH	24	16	40	0.2	yes
wash	Drosophila melanogaster	9	MY2079	L4	wash	DMSO	35	27	62	0.129032	yes
wash	Drosophila melanogaster	9	MY2079	L4	wash	H2O	32	32	64	0	yes
wash	Drosophila melanogaster	9	N2	L4	isoamylalc	EtOH	15	9	24	0.25	yes
wash	Drosophila melanogaster	9	N2	L4	isoamylalc	DMSO	36	14	50	0.44	yes
wash	Drosophila melanogaster	9	N2	L4	isoamylalc	H2O	41	15	56	0.464286	yes
wash	Drosophila melanogaster	9	N2	L4	octanol	EtOH	25	43	68	-0.264706	yes
wash	Drosophila melanogaster	9	N2	L4	octanol	DMSO	27	57	84	-0.357143	yes
wash	Drosophila melanogaster	9	N2	L4	octanol	H2O	28	28	56	0	yes
wash	Drosophila melanogaster	9	N2	L4	wash	EtOH	32	26	58	0.103448	yes
wash	Drosophila melanogaster	9	N2	L4	wash	DMSO	40	36	76	0.0526316	yes
wash	Drosophila melanogaster	9	N2	L4	wash	H2O	44	29	73	0.205479	yes
wash	Drosophila melanogaster	10	MY2079	L4	isoamylalc	EtOH	28	26	54	0.037037	yes
wash	Drosophila melanogaster	10	MY2079	L4	isoamylalc	DMSO	39	31	70	0.114286	yes
wash	Drosophila melanogaster	10	MY2079	L4	isoamylalc	H2O	56	26	82	0.365854	yes
wash	Drosophila melanogaster	10	MY2079	L4	octanol	EtOH	12	75	87	-0.724138	yes
wash	Drosophila melanogaster	10	MY2079	L4	octanol	DMSO	10	53	63	-0.68254	yes
wash	Drosophila melanogaster	10	MY2079	L4	octanol	H2O	5	38	43	-0.767442	yes
wash	Drosophila melanogaster	10	MY2079	L4	wash	EtOH	45	35	80	0.125	yes
wash	Drosophila melanogaster	10	MY2079	L4	wash	DMSO	43	57	100	-0.14	yes
wash	Drosophila melanogaster	10	MY2079	L4	wash	H2O	21	34	55	-0.236364	yes
wash	Drosophila melanogaster	10	N2	L4	isoamylalc	EtOH	17	5	22	0.545455	yes
wash	Drosophila melanogaster	10	N2	L4	isoamylalc	DMSO	63	15	78	0.615385	yes
wash	Drosophila melanogaster	10	N2	L4	isoamylalc	H2O	37	9	46	0.608696	yes
wash	Drosophila melanogaster	10	N2	L4	octanol	EtOH	3	24	27	-0.777778	yes
wash	Drosophila melanogaster	10	N2	L4	octanol	DMSO	7	36	43	-0.674419	yes
wash	Drosophila melanogaster	10	N2	L4	octanol	H2O	5	26	31	-0.677419	yes
wash	Drosophila melanogaster	10	N2	L4	wash	EtOH	2	1	3	0.333333	yes
wash	Drosophila melanogaster	10	N2	L4	wash	DMSO	24	21	45	0.0666667	yes
wash	Drosophila melanogaster	10	N2	L4	wash	H2O	21	21	42	0	yes
wash	Drosophila melanogaster	11	MY2079	L4	isoamylalc	H2O	70	32	102	0.372549	yes
wash	Drosophila melanogaster	11	MY2079	L4	isoamylalc	EtOH	56	36	92	0.217391	yes
wash	Drosophila melanogaster	11	MY2079	L4	isoamylalc	DMSO	31	37	68	-0.0882353	yes
wash	Drosophila melanogaster	11	MY2079	L4	octanol	H2O	22	46	68	-0.352941	yes
wash	Drosophila melanogaster	11	MY2079	L4	octanol	EtOH	9	71	80	-0.775	yes
wash	Drosophila melanogaster	11	MY2079	L4	octanol	DMSO	19	89	108	-0.648148	yes
wash	Drosophila melanogaster	11	MY2079	L4	wash	H2O	82	65	147	0.115646	yes
wash	Drosophila melanogaster	11	MY2079	L4	wash	EtOH	46	52	98	-0.0612245	yes
wash	Drosophila melanogaster	11	MY2079	L4	wash	DMSO	62	61	123	0.00813008	yes
wash	Drosophila melanogaster	11	N2	L4	isoamylalc	H2O	72	35	107	0.345794	yes
wash	Drosophila melanogaster	11	N2	L4	isoamylalc	EtOH	69	41	110	0.254545	yes
wash	Drosophila melanogaster	11	N2	L4	isoamylalc	DMSO	78	28	106	0.471698	yes
wash	Drosophila melanogaster	11	N2	L4	octanol	H2O	21	39	60	-0.3	yes
wash	Drosophila melanogaster	11	N2	L4	octanol	EtOH	28	58	86	-0.348837	yes
wash	Drosophila melanogaster	11	N2	L4	octanol	DMSO	20	90	110	-0.636364	yes
wash	Drosophila melanogaster	11	N2	L4	wash	H2O	36	25	61	0.180328	yes
wash	Drosophila melanogaster	11	N2	L4	wash	EtOH	33	45	78	-0.153846	yes
wash	Drosophila melanogaster	11	N2	L4	wash	DMSO	49	68	117	-0.162393	yes
wash	Drosophila melanogaster	12	MY2079	L4	isoamylalc	H2O	33	23	56	0.178571	yes
wash	Drosophila melanogaster	12	MY2079	L4	isoamylalc	EtOH	49	35	84	0.166667	yes
wash	Drosophila melanogaster	12	MY2079	L4	isoamylalc	DMSO	42	23	65	0.292308	yes
wash	Drosophila melanogaster	12	MY2079	L4	octanol	H2O	27	68	95	-0.431579	yes
wash	Drosophila melanogaster	12	MY2079	L4	octanol	EtOH	10	50	60	-0.666667	yes
wash	Drosophila melanogaster	12	MY2079	L4	octanol	DMSO	13	49	62	-0.580645	yes
wash	Drosophila melanogaster	12	MY2079	L4	wash	H2O	44	52	96	-0.0833333	yes
wash	Drosophila melanogaster	12	MY2079	L4	wash	EtOH	32	46	78	-0.179487	yes
wash	Drosophila melanogaster	12	MY2079	L4	wash	DMSO	51	36	87	0.172414	yes
wash	Drosophila melanogaster	12	N2	L4	isoamylalc	H2O	24	13	37	0.297297	yes
wash	Drosophila melanogaster	12	N2	L4	isoamylalc	EtOH	36	22	58	0.241379	yes
wash	Drosophila melanogaster	12	N2	L4	isoamylalc	DMSO	48	32	80	0.2	yes
wash	Drosophila melanogaster	12	N2	L4	octanol	H2O	2	8	10	-0.6	yes
wash	Drosophila melanogaster	12	N2	L4	octanol	EtOH	6	17	23	-0.478261	yes
wash	Drosophila melanogaster	12	N2	L4	octanol	DMSO	1	24	25	-0.92	yes
wash	Drosophila melanogaster	12	N2	L4	wash	H2O	24	33	57	-0.157895	yes
wash	Drosophila melanogaster	12	N2	L4	wash	EtOH	38	23	61	0.245902	yes
wash	Drosophila melanogaster	12	N2	L4	wash	DMSO	24	38	62	-0.225806	yes

## Sheet: 1F D. melanogaster wash dauer
assay	invertebrate_species	rep	worm_strain	stage	choice_treat	solvent	count_treat	count_solvent	total	index	include	comments
wash	Drosophila melanogaster	1	MY2079	dauer	wash	DMSO	15	22	37	-0.189189	yes
wash	Drosophila melanogaster	1	MY2079	dauer	isoamylalc	DMSO	31	6	37	0.675676	yes
wash	Drosophila melanogaster	1	MY2079	dauer	wash	H2O	19	26	45	-0.155556	yes
wash	Drosophila melanogaster	1	MY2079	dauer	isoamylalc	H2O	42	3	45	0.866667	yes
wash	Drosophila melanogaster	1	MY2079	dauer	isoamylalc	EtOH	39	10	49	0.591837	yes
wash	Drosophila melanogaster	1	MY2079	dauer	octanol	DMSO	29	22	51	0.137255	yes
wash	Drosophila melanogaster	1	MY2079	dauer	wash	EtOH	25	27	52	-0.0384615	yes
wash	Drosophila melanogaster	1	MY2079	dauer	octanol	EtOH	30	43	73	-0.178082	yes
wash	Drosophila melanogaster	1	MY2079	dauer	octanol	H2O	44	35	79	0.113924	yes
wash	Drosophila melanogaster	1	N2	dauer	isoamylalc	H2O	14	9	23	0.217391	yes
wash	Drosophila melanogaster	1	N2	dauer	wash	EtOH	9	14	23	-0.217391	yes
wash	Drosophila melanogaster	1	N2	dauer	octanol	DMSO	8	17	25	-0.36	yes
wash	Drosophila melanogaster	1	N2	dauer	wash	H2O	12	15	27	-0.111111	yes
wash	Drosophila melanogaster	1	N2	dauer	octanol	H2O	8	19	27	-0.407407	yes
wash	Drosophila melanogaster	1	N2	dauer	isoamylalc	DMSO	14	14	28	0	yes
wash	Drosophila melanogaster	1	N2	dauer	octanol	EtOH	7	27	34	-0.588235	yes
wash	Drosophila melanogaster	1	N2	dauer	isoamylalc	EtOH	27	12	39	0.384615	yes
wash	Drosophila melanogaster	1	N2	dauer	wash	DMSO	13	29	42	-0.380952	yes
wash	Drosophila melanogaster	2	MY2079	dauer	octanol	EtOH	31	44	75	-0.173333	yes
wash	Drosophila melanogaster	2	MY2079	dauer	wash	EtOH	39	49	88	-0.113636	yes
wash	Drosophila melanogaster	2	MY2079	dauer	isoamylalc	H2O	65	24	89	0.460674	yes
wash	Drosophila melanogaster	2	MY2079	dauer	isoamylalc	DMSO	66	24	90	0.466667	yes
wash	Drosophila melanogaster	2	MY2079	dauer	octanol	H2O	53	48	101	0.049505	yes
wash	Drosophila melanogaster	2	MY2079	dauer	wash	DMSO	58	46	104	0.115385	yes
wash	Drosophila melanogaster	2	MY2079	dauer	isoamylalc	EtOH	91	21	112	0.625	yes
wash	Drosophila melanogaster	2	MY2079	dauer	octanol	DMSO	70	48	118	0.186441	yes
wash	Drosophila melanogaster	2	MY2079	dauer	wash	H2O	74	57	131	0.129771	yes
wash	Drosophila melanogaster	2	N2	dauer	wash	H2O	10	10	20	0	yes
wash	Drosophila melanogaster	2	N2	dauer	isoamylalc	H2O	17	5	22	0.545455	yes
wash	Drosophila melanogaster	2	N2	dauer	wash	DMSO	12	12	24	0	yes
wash	Drosophila melanogaster	2	N2	dauer	octanol	DMSO	7	18	25	-0.44	yes
wash	Drosophila melanogaster	2	N2	dauer	octanol	H2O	16	9	25	0.28	yes
wash	Drosophila melanogaster	2	N2	dauer	isoamylalc	EtOH	16	9	25	0.28	yes
wash	Drosophila melanogaster	2	N2	dauer	isoamylalc	DMSO	19	8	27	0.407407	yes
wash	Drosophila melanogaster	2	N2	dauer	octanol	EtOH	19	22	41	-0.0731707	yes
wash	Drosophila melanogaster	2	N2	dauer	wash	EtOH	30	15	45	0.333333	yes
wash	Drosophila melanogaster	3	MY2079	dauer	octanol	H2O	67	51	118	0.135593	yes
wash	Drosophila melanogaster	3	MY2079	dauer	octanol	DMSO	74	45	119	0.243697	yes
wash	Drosophila melanogaster	3	MY2079	dauer	isoamylalc	EtOH	118	16	134	0.761194	yes
wash	Drosophila melanogaster	3	MY2079	dauer	octanol	EtOH	90	52	142	0.267606	yes
wash	Drosophila melanogaster	3	MY2079	dauer	wash	H2O	104	44	148	0.405405	yes
wash	Drosophila melanogaster	3	MY2079	dauer	isoamylalc	H2O	133	31	164	0.621951	yes
wash	Drosophila melanogaster	3	MY2079	dauer	wash	DMSO	131	55	186	0.408602	yes
wash	Drosophila melanogaster	3	MY2079	dauer	wash	EtOH	142	50	192	0.479167	yes
wash	Drosophila melanogaster	3	MY2079	dauer	isoamylalc	DMSO	160	33	193	0.658031	yes
wash	Drosophila melanogaster	3	N2	dauer	octanol	H2O	8	4	12	0.333333	yes
wash	Drosophila melanogaster	3	N2	dauer	octanol	DMSO	9	6	15	0.2	yes
wash	Drosophila melanogaster	3	N2	dauer	isoamylalc	DMSO	12	6	18	0.333333	yes
wash	Drosophila melanogaster	3	N2	dauer	wash	EtOH	12	9	21	0.142857	yes
wash	Drosophila melanogaster	3	N2	dauer	octanol	EtOH	8	13	21	-0.238095	yes
wash	Drosophila melanogaster	3	N2	dauer	isoamylalc	H2O	14	9	23	0.217391	yes
wash	Drosophila melanogaster	3	N2	dauer	isoamylalc	EtOH	18	6	24	0.5	yes
wash	Drosophila melanogaster	3	N2	dauer	wash	DMSO	15	11	26	0.153846	yes
wash	Drosophila melanogaster	3	N2	dauer	wash	H2O	19	19	38	0	yes
wash	Drosophila melanogaster	4	MY2079	dauer	isoamylalc	DMSO	54	20	74	0.459459	yes
wash	Drosophila melanogaster	4	MY2079	dauer	isoamylalc	H2O	44	32	76	0.157895	yes
wash	Drosophila melanogaster	4	MY2079	dauer	wash	EtOH	38	38	76	0	yes
wash	Drosophila melanogaster	4	MY2079	dauer	wash	H2O	43	38	81	0.0617284	yes
wash	Drosophila melanogaster	4	MY2079	dauer	octanol	EtOH	37	46	83	-0.108434	yes
wash	Drosophila melanogaster	4	MY2079	dauer	wash	DMSO	43	42	85	0.0117647	yes
wash	Drosophila melanogaster	4	MY2079	dauer	octanol	H2O	61	37	98	0.244898	yes
wash	Drosophila melanogaster	4	MY2079	dauer	isoamylalc	EtOH	73	29	102	0.431373	yes
wash	Drosophila melanogaster	4	MY2079	dauer	octanol	DMSO	45	57	102	-0.117647	yes
wash	Drosophila melanogaster	4	N2	dauer	wash	H2O	1	5	6	NA	no	threshold not reached, exclude
wash	Drosophila melanogaster	4	N2	dauer	octanol	H2O	3	7	10	-0.4	yes
wash	Drosophila melanogaster	4	N2	dauer	octanol	EtOH	6	6	12	0	yes
wash	Drosophila melanogaster	4	N2	dauer	isoamylalc	DMSO	9	3	12	0.5	yes
wash	Drosophila melanogaster	4	N2	dauer	isoamylalc	EtOH	12	1	13	0.846154	yes
wash	Drosophila melanogaster	4	N2	dauer	isoamylalc	H2O	11	3	14	0.571429	yes
wash	Drosophila melanogaster	4	N2	dauer	octanol	DMSO	5	9	14	-0.285714	yes
wash	Drosophila melanogaster	4	N2	dauer	wash	EtOH	14	8	22	0.272727	yes
wash	Drosophila melanogaster	4	N2	dauer	wash	DMSO	14	8	22	0.272727	yes
wash	Drosophila melanogaster	5	MY2079	dauer	wash	DMSO	31	52	83	-0.253012	yes
wash	Drosophila melanogaster	5	MY2079	dauer	isoamylalc	DMSO	82	32	114	0.438596	yes
wash	Drosophila melanogaster	5	MY2079	dauer	octanol	EtOH	39	78	117	-0.333333	yes
wash	Drosophila melanogaster	5	MY2079	dauer	octanol	H2O	54	64	118	-0.0847458	yes
wash	Drosophila melanogaster	5	MY2079	dauer	wash	H2O	57	61	118	-0.0338983	yes
wash	Drosophila melanogaster	5	MY2079	dauer	isoamylalc	H2O	100	32	132	0.515152	yes
wash	Drosophila melanogaster	5	MY2079	dauer	wash	EtOH	71	62	133	0.0676692	yes
wash	Drosophila melanogaster	5	MY2079	dauer	isoamylalc	EtOH	92	49	141	0.304965	yes
wash	Drosophila melanogaster	5	MY2079	dauer	octanol	DMSO	47	119	166	-0.433735	yes
wash	Drosophila melanogaster	5	N2	dauer	octanol	EtOH	2	8	10	-0.6	yes
wash	Drosophila melanogaster	5	N2	dauer	octanol	DMSO	6	4	10	0.2	yes
wash	Drosophila melanogaster	5	N2	dauer	isoamylalc	EtOH	8	4	12	0.333333	yes
wash	Drosophila melanogaster	5	N2	dauer	wash	DMSO	8	5	13	0.230769	yes
wash	Drosophila melanogaster	5	N2	dauer	octanol	H2O	5	10	15	-0.333333	yes
wash	Drosophila melanogaster	5	N2	dauer	octanol	DMSO	10	6	16	0.25	yes
wash	Drosophila melanogaster	5	N2	dauer	isoamylalc	H2O	14	12	26	0.0769231	yes
wash	Drosophila melanogaster	5	N2	dauer	wash	H2O	13	16	29	-0.103448	yes
wash	Drosophila melanogaster	5	N2	dauer	wash	EtOH	26	16	42	0.238095	yes
wash	Drosophila melanogaster	6	MY2079	dauer	isoamylalc	H2O	66	13	79	0.670886	yes
wash	Drosophila melanogaster	6	MY2079	dauer	wash	H2O	18	61	79	-0.544304	yes
wash	Drosophila melanogaster	6	MY2079	dauer	wash	EtOH	35	48	83	-0.156627	yes
wash	Drosophila melanogaster	6	MY2079	dauer	octanol	H2O	43	57	100	-0.14	yes
wash	Drosophila melanogaster	6	MY2079	dauer	octanol	DMSO	50	54	104	-0.0384615	yes
wash	Drosophila melanogaster	6	MY2079	dauer	isoamylalc	EtOH	82	27	109	0.504587	yes
wash	Drosophila melanogaster	6	MY2079	dauer	wash	DMSO	45	68	113	-0.20354	yes
wash	Drosophila melanogaster	6	MY2079	dauer	octanol	EtOH	58	60	118	-0.0169492	yes
wash	Drosophila melanogaster	6	MY2079	dauer	isoamylalc	DMSO	93	42	135	0.377778	yes
wash	Drosophila melanogaster	6	N2	dauer	octanol	H2O	3	9	12	-0.5	yes
wash	Drosophila melanogaster	6	N2	dauer	octanol	DMSO	3	9	12	-0.5	yes
wash	Drosophila melanogaster	6	N2	dauer	isoamylalc	EtOH	9	4	13	0.384615	yes
wash	Drosophila melanogaster	6	N2	dauer	wash	EtOH	10	5	15	0.333333	yes
wash	Drosophila melanogaster	6	N2	dauer	wash	DMSO	11	7	18	0.222222	yes
wash	Drosophila melanogaster	6	N2	dauer	octanol	EtOH	7	13	20	-0.3	yes
wash	Drosophila melanogaster	6	N2	dauer	isoamylalc	H2O	21	20	41	0.0243902	yes
wash	Drosophila melanogaster	6	N2	dauer	wash	H2O	35	9	44	0.590909	yes
wash	Drosophila melanogaster	6	N2	dauer	isoamylalc	DMSO	19	35	54	-0.296296	yes
wash	Drosophila melanogaster	7	MY2079	dauer	octanol	H2O	25	30	55	-0.0909091	yes
wash	Drosophila melanogaster	7	MY2079	dauer	octanol	DMSO	32	47	79	-0.189873	yes
wash	Drosophila melanogaster	7	MY2079	dauer	isoamylalc	EtOH	72	12	84	0.714286	yes
wash	Drosophila melanogaster	7	MY2079	dauer	isoamylalc	DMSO	72	14	86	0.674419	yes
wash	Drosophila melanogaster	7	MY2079	dauer	octanol	EtOH	38	52	90	-0.155556	yes
wash	Drosophila melanogaster	7	MY2079	dauer	wash	DMSO	36	62	98	-0.265306	yes
wash	Drosophila melanogaster	7	MY2079	dauer	isoamylalc	H2O	76	26	102	0.490196	yes
wash	Drosophila melanogaster	7	MY2079	dauer	wash	H2O	77	75	152	0.0131579	yes
wash	Drosophila melanogaster	7	MY2079	dauer	wash	EtOH	81	95	176	-0.0795455	yes
wash	Drosophila melanogaster	7	N2	dauer	isoamylalc	DMSO	8	4	12	0.333333	yes
wash	Drosophila melanogaster	7	N2	dauer	wash	H2O	6	12	18	-0.333333	yes
wash	Drosophila melanogaster	7	N2	dauer	wash	EtOH	15	9	24	0.25	yes
wash	Drosophila melanogaster	7	N2	dauer	isoamylalc	H2O	15	11	26	0.153846	yes
wash	Drosophila melanogaster	7	N2	dauer	isoamylalc	EtOH	20	6	26	0.538462	yes
wash	Drosophila melanogaster	7	N2	dauer	wash	DMSO	14	16	30	-0.0666667	yes
wash	Drosophila melanogaster	7	N2	dauer	octanol	H2O	16	21	37	-0.135135	yes
wash	Drosophila melanogaster	7	N2	dauer	octanol	EtOH	25	21	46	0.0869565	yes
wash	Drosophila melanogaster	7	N2	dauer	octanol	DMSO	27	26	53	0.0188679	yes
wash	Drosophila melanogaster	8	MY2079	dauer	isoamylalc	H2O	24	8	32	0.5	yes
wash	Drosophila melanogaster	8	MY2079	dauer	isoamylalc	EtOH	30	14	44	0.363636	yes
wash	Drosophila melanogaster	8	MY2079	dauer	octanol	H2O	27	47	74	-0.27027	yes
wash	Drosophila melanogaster	8	MY2079	dauer	wash	H2O	37	51	88	-0.159091	yes
wash	Drosophila melanogaster	8	MY2079	dauer	isoamylalc	DMSO	59	30	89	0.325843	yes
wash	Drosophila melanogaster	8	MY2079	dauer	wash	EtOH	54	68	122	-0.114754	yes
wash	Drosophila melanogaster	8	MY2079	dauer	octanol	EtOH	47	81	128	-0.265625	yes
wash	Drosophila melanogaster	8	MY2079	dauer	wash	DMSO	73	58	131	0.114504	yes
wash	Drosophila melanogaster	8	MY2079	dauer	octanol	DMSO	40	104	144	-0.444444	yes
wash	Drosophila melanogaster	8	N2	dauer	isoamylalc	DMSO	9	3	12	0.5	yes
wash	Drosophila melanogaster	8	N2	dauer	octanol	DMSO	5	10	15	-0.333333	yes
wash	Drosophila melanogaster	8	N2	dauer	wash	H2O	6	10	16	-0.25	yes
wash	Drosophila melanogaster	8	N2	dauer	wash	EtOH	9	9	18	0	yes
wash	Drosophila melanogaster	8	N2	dauer	isoamylalc	EtOH	10	10	20	0	yes
wash	Drosophila melanogaster	8	N2	dauer	wash	DMSO	9	12	21	-0.142857	yes
wash	Drosophila melanogaster	8	N2	dauer	isoamylalc	H2O	11	11	22	0	yes
wash	Drosophila melanogaster	8	N2	dauer	octanol	H2O	6	16	22	-0.454545	yes
wash	Drosophila melanogaster	8	N2	dauer	octanol	EtOH	10	14	24	-0.166667	yes
wash	Drosophila melanogaster	9	MY2079	dauer	wash	DMSO	16	27	43	-0.255814	yes
wash	Drosophila melanogaster	9	MY2079	dauer	wash	H2O	26	34	60	-0.133333	yes
wash	Drosophila melanogaster	9	MY2079	dauer	isoamylalc	EtOH	51	13	64	0.59375	yes
wash	Drosophila melanogaster	9	MY2079	dauer	octanol	EtOH	29	37	66	-0.121212	yes
wash	Drosophila melanogaster	9	MY2079	dauer	wash	EtOH	27	42	69	-0.217391	yes
wash	Drosophila melanogaster	9	MY2079	dauer	octanol	H2O	31	39	70	-0.114286	yes
wash	Drosophila melanogaster	9	MY2079	dauer	isoamylalc	H2O	56	17	73	0.534247	yes
wash	Drosophila melanogaster	9	MY2079	dauer	octanol	DMSO	26	53	79	-0.341772	yes
wash	Drosophila melanogaster	9	MY2079	dauer	isoamylalc	DMSO	71	25	96	0.479167	yes
wash	Drosophila melanogaster	9	N2	dauer	wash	DMSO	7	4	11	0.272727	yes
wash	Drosophila melanogaster	9	N2	dauer	octanol	EtOH	3	9	12	-0.5	yes
wash	Drosophila melanogaster	9	N2	dauer	octanol	DMSO	8	7	15	0.0666667	yes
wash	Drosophila melanogaster	9	N2	dauer	isoamylalc	EtOH	10	7	17	0.176471	yes
wash	Drosophila melanogaster	9	N2	dauer	wash	H2O	12	8	20	0.2	yes
wash	Drosophila melanogaster	9	N2	dauer	wash	EtOH	4	17	21	-0.619048	yes
wash	Drosophila melanogaster	9	N2	dauer	octanol	H2O	8	13	21	-0.238095	yes
wash	Drosophila melanogaster	9	N2	dauer	isoamylalc	H2O	15	7	22	0.363636	yes
wash	Drosophila melanogaster	9	N2	dauer	isoamylalc	DMSO	33	26	59	0.118644	yes
wash	Drosophila melanogaster	10	MY2079	dauer	wash	H2O	30	28	58	0.0344828	yes
wash	Drosophila melanogaster	10	MY2079	dauer	octanol	EtOH	27	32	59	-0.0847458	yes
wash	Drosophila melanogaster	10	MY2079	dauer	octanol	H2O	20	45	65	-0.384615	yes
wash	Drosophila melanogaster	10	MY2079	dauer	wash	EtOH	29	37	66	-0.121212	yes
wash	Drosophila melanogaster	10	MY2079	dauer	wash	DMSO	46	27	73	0.260274	yes
wash	Drosophila melanogaster	10	MY2079	dauer	isoamylalc	H2O	50	23	73	0.369863	yes
wash	Drosophila melanogaster	10	MY2079	dauer	isoamylalc	EtOH	51	31	82	0.243902	yes
wash	Drosophila melanogaster	10	MY2079	dauer	octanol	DMSO	32	56	88	-0.272727	yes
wash	Drosophila melanogaster	10	MY2079	dauer	isoamylalc	DMSO	66	25	91	0.450549	yes
wash	Drosophila melanogaster	10	N2	dauer	wash	EtOH	9	2	11	0.636364	yes
wash	Drosophila melanogaster	10	N2	dauer	octanol	EtOH	3	9	12	-0.5	yes
wash	Drosophila melanogaster	10	N2	dauer	isoamylalc	EtOH	9	6	15	0.2	yes
wash	Drosophila melanogaster	10	N2	dauer	octanol	DMSO	6	9	15	-0.2	yes
wash	Drosophila melanogaster	10	N2	dauer	wash	H2O	11	7	18	0.222222	yes
wash	Drosophila melanogaster	10	N2	dauer	wash	DMSO	15	12	27	0.111111	yes
wash	Drosophila melanogaster	10	N2	dauer	octanol	H2O	9	18	27	-0.333333	yes
wash	Drosophila melanogaster	10	N2	dauer	isoamylalc	H2O	17	13	30	0.133333	yes
wash	Drosophila melanogaster	10	N2	dauer	isoamylalc	DMSO	16	17	33	-0.030303	yes
wash	Drosophila melanogaster	11	MY2079	dauer	octanol	EtOH	25	59	84	-0.404762	yes
wash	Drosophila melanogaster	11	MY2079	dauer	isoamylalc	DMSO	88	20	108	0.62963	yes
wash	Drosophila melanogaster	11	MY2079	dauer	octanol	DMSO	69	69	138	0	yes
wash	Drosophila melanogaster	11	MY2079	dauer	wash	EtOH	76	81	157	-0.0318471	yes
wash	Drosophila melanogaster	11	MY2079	dauer	octanol	H2O	67	98	165	-0.187879	yes
wash	Drosophila melanogaster	11	MY2079	dauer	wash	DMSO	86	100	186	-0.0752688	yes
wash	Drosophila melanogaster	11	MY2079	dauer	isoamylalc	EtOH	140	46	186	0.505376	yes
wash	Drosophila melanogaster	11	MY2079	dauer	isoamylalc	H2O	190	49	239	0.589958	yes
wash	Drosophila melanogaster	11	MY2079	dauer	wash	H2O	131	119	250	0.048	yes
wash	Drosophila melanogaster	12	MY2079	dauer	wash	H2O	56	41	97	0.154639	yes
wash	Drosophila melanogaster	12	MY2079	dauer	isoamylalc	EtOH	72	31	103	0.398058	yes
wash	Drosophila melanogaster	12	MY2079	dauer	wash	EtOH	56	49	105	0.0666667	yes
wash	Drosophila melanogaster	12	MY2079	dauer	isoamylalc	H2O	89	32	121	0.471074	yes
wash	Drosophila melanogaster	12	MY2079	dauer	octanol	H2O	41	86	127	-0.354331	yes
wash	Drosophila melanogaster	12	MY2079	dauer	isoamylalc	DMSO	99	37	136	0.455882	yes
wash	Drosophila melanogaster	12	MY2079	dauer	octanol	EtOH	38	99	137	-0.445255	yes
wash	Drosophila melanogaster	12	MY2079	dauer	octanol	DMSO	35	104	139	-0.496403	yes
wash	Drosophila melanogaster	12	MY2079	dauer	wash	DMSO	59	80	139	-0.151079	yes
