# Supplementary material for: The nematode Caenorhabditis elegans and diverse potential invertebrate vectors predominantly interact opportunistically
Source: Frontiers journal article supplement (doi:10.3389/fevo.2023.1069056), 2023-02-01
Supplement: Table_5.XLSX [file Table_5.XLSX]

## Sheet: 2B O. asellus extract L4
assay	invertebrate_species	rep	worm_strain	stage	choice_treat	solvent	count_treat	count_solvent	total	index	include	comments
extract	Oniscus asellus	1	MY2079	L4	extract	DMSO	36	40	76	-0.0526316	yes
extract	Oniscus asellus	1	MY2079	L4	extract	EtOH	44	55	99	-0.111111	yes
extract	Oniscus asellus	1	MY2079	L4	extract	H2O	54	46	100	NA	no	fungi on plate, exclude
extract	Oniscus asellus	1	MY2079	L4	isoamylalc	DMSO	73	6	79	0.848101	yes
extract	Oniscus asellus	1	MY2079	L4	isoamylalc	EtOH	88	12	100	0.76	yes
extract	Oniscus asellus	1	MY2079	L4	isoamylalc	H2O	61	0	61	1	yes
extract	Oniscus asellus	1	MY2079	L4	octanol	DMSO	4	109	113	-0.929204	yes
extract	Oniscus asellus	1	MY2079	L4	octanol	EtOH	1	83	84	-0.97619	yes
extract	Oniscus asellus	1	MY2079	L4	octanol	H2O	3	61	64	-0.90625	yes
extract	Oniscus asellus	1	N2	L4	extract	DMSO	25	23	48	0.0416667	yes
extract	Oniscus asellus	1	N2	L4	extract	EtOH	34	62	96	-0.291667	yes
extract	Oniscus asellus	1	N2	L4	extract	H2O	32	34	66	-0.030303	yes
extract	Oniscus asellus	1	N2	L4	isoamylalc	DMSO	49	1	50	0.96	yes
extract	Oniscus asellus	1	N2	L4	isoamylalc	EtOH	81	2	83	0.951807	yes
extract	Oniscus asellus	1	N2	L4	isoamylalc	H2O	83	6	89	0.865169	yes
extract	Oniscus asellus	1	N2	L4	octanol	DMSO	13	59	72	-0.638889	yes
extract	Oniscus asellus	1	N2	L4	octanol	EtOH	4	77	81	-0.901235	yes
extract	Oniscus asellus	1	N2	L4	octanol	H2O	9	79	88	-0.795455	yes
extract	Oniscus asellus	2	MY2079	L4	extract	DMSO	23	34	57	-0.192982	yes
extract	Oniscus asellus	2	MY2079	L4	extract	EtOH	34	40	74	-0.0810811	yes
extract	Oniscus asellus	2	MY2079	L4	extract	H2O	21	29	50	-0.16	yes
extract	Oniscus asellus	2	MY2079	L4	isoamylalc	DMSO	44	28	72	0.222222	yes
extract	Oniscus asellus	2	MY2079	L4	isoamylalc	EtOH	68	22	90	0.511111	yes
extract	Oniscus asellus	2	MY2079	L4	isoamylalc	H2O	46	16	62	0.483871	yes
extract	Oniscus asellus	2	MY2079	L4	octanol	DMSO	6	49	55	-0.781818	yes
extract	Oniscus asellus	2	MY2079	L4	octanol	EtOH	11	45	56	-0.607143	yes
extract	Oniscus asellus	2	MY2079	L4	octanol	H2O	8	63	71	-0.774648	yes
extract	Oniscus asellus	2	N2	L4	extract	DMSO	19	29	48	-0.208333	yes
extract	Oniscus asellus	2	N2	L4	extract	EtOH	32	40	72	-0.111111	yes
extract	Oniscus asellus	2	N2	L4	extract	H2O	28	40	68	-0.176471	yes
extract	Oniscus asellus	2	N2	L4	isoamylalc	DMSO	72	5	77	0.87013	yes
extract	Oniscus asellus	2	N2	L4	isoamylalc	EtOH	60	4	64	0.875	yes
extract	Oniscus asellus	2	N2	L4	isoamylalc	H2O	49	3	52	0.884615	yes
extract	Oniscus asellus	2	N2	L4	octanol	DMSO	6	59	65	-0.815385	yes
extract	Oniscus asellus	2	N2	L4	octanol	EtOH	7	25	32	-0.5625	yes
extract	Oniscus asellus	2	N2	L4	octanol	H2O	4	39	43	-0.813953	yes
extract	Oniscus asellus	3	MY2079	L4	extract	DMSO	33	21	54	0.222222	yes
extract	Oniscus asellus	3	MY2079	L4	extract	EtOH	12	21	33	-0.272727	yes
extract	Oniscus asellus	3	MY2079	L4	extract	H2O	34	35	69	-0.0144928	yes
extract	Oniscus asellus	3	MY2079	L4	isoamylalc	DMSO	41	10	51	0.607843	yes
extract	Oniscus asellus	3	MY2079	L4	isoamylalc	EtOH	44	7	51	0.72549	yes
extract	Oniscus asellus	3	MY2079	L4	isoamylalc	H2O	65	13	78	0.666667	yes
extract	Oniscus asellus	3	MY2079	L4	octanol	DMSO	6	51	57	-0.789474	yes
extract	Oniscus asellus	3	MY2079	L4	octanol	EtOH	6	53	59	-0.79661	yes
extract	Oniscus asellus	3	MY2079	L4	octanol	H2O	6	29	35	-0.657143	yes
extract	Oniscus asellus	3	N2	L4	extract	DMSO	44	28	72	0.222222	yes
extract	Oniscus asellus	3	N2	L4	extract	EtOH	12	27	39	-0.384615	yes
extract	Oniscus asellus	3	N2	L4	extract	H2O	15	14	29	0.0344828	yes
extract	Oniscus asellus	3	N2	L4	isoamylalc	DMSO	51	4	55	0.854545	yes
extract	Oniscus asellus	3	N2	L4	isoamylalc	EtOH	81	3	84	0.928571	yes
extract	Oniscus asellus	3	N2	L4	isoamylalc	H2O	77	7	84	0.833333	yes
extract	Oniscus asellus	3	N2	L4	octanol	DMSO	9	53	62	-0.709677	yes
extract	Oniscus asellus	3	N2	L4	octanol	EtOH	4	45	49	-0.836735	yes
extract	Oniscus asellus	3	N2	L4	octanol	H2O	4	64	68	-0.882353	yes
extract	Oniscus asellus	4	MY2079	L4	extract	DMSO	23	37	60	-0.233333	yes
extract	Oniscus asellus	4	MY2079	L4	extract	EtOH	28	34	62	-0.0967742	yes
extract	Oniscus asellus	4	MY2079	L4	extract	H2O	29	28	57	0.0175439	yes
extract	Oniscus asellus	4	MY2079	L4	isoamylalc	DMSO	37	7	44	0.681818	yes
extract	Oniscus asellus	4	MY2079	L4	isoamylalc	EtOH	49	14	63	0.555556	yes
extract	Oniscus asellus	4	MY2079	L4	isoamylalc	H2O	49	13	62	0.580645	yes
extract	Oniscus asellus	4	MY2079	L4	octanol	DMSO	3	87	90	-0.933333	yes
extract	Oniscus asellus	4	MY2079	L4	octanol	EtOH	4	46	50	-0.84	yes
extract	Oniscus asellus	4	MY2079	L4	octanol	H2O	1	53	54	-0.962963	yes
extract	Oniscus asellus	4	N2	L4	extract	DMSO	27	19	46	0.173913	yes
extract	Oniscus asellus	4	N2	L4	extract	EtOH	33	20	53	0.245283	yes
extract	Oniscus asellus	4	N2	L4	extract	H2O	21	12	33	0.272727	yes
extract	Oniscus asellus	4	N2	L4	isoamylalc	DMSO	28	8	36	0.555556	yes
extract	Oniscus asellus	4	N2	L4	isoamylalc	EtOH	49	7	56	0.75	yes
extract	Oniscus asellus	4	N2	L4	isoamylalc	H2O	27	9	36	0.5	yes
extract	Oniscus asellus	4	N2	L4	octanol	DMSO	4	44	48	-0.833333	yes
extract	Oniscus asellus	4	N2	L4	octanol	EtOH	0	24	24	-1	yes
extract	Oniscus asellus	4	N2	L4	octanol	H2O	2	32	34	-0.882353	yes
extract	Oniscus asellus	5	MY2079	L4	extract	DMSO	18	27	45	-0.2	yes
extract	Oniscus asellus	5	MY2079	L4	extract	EtOH	30	27	57	0.0526316	yes
extract	Oniscus asellus	5	MY2079	L4	extract	H2O	16	28	44	-0.272727	yes
extract	Oniscus asellus	5	MY2079	L4	isoamylalc	DMSO	68	23	91	0.494505	yes
extract	Oniscus asellus	5	MY2079	L4	isoamylalc	EtOH	49	20	69	0.42029	yes
extract	Oniscus asellus	5	MY2079	L4	isoamylalc	H2O	42	16	58	0.448276	yes
extract	Oniscus asellus	5	MY2079	L4	octanol	DMSO	15	51	66	-0.545455	yes
extract	Oniscus asellus	5	MY2079	L4	octanol	EtOH	18	33	51	-0.294118	yes
extract	Oniscus asellus	5	MY2079	L4	octanol	H2O	12	35	47	-0.489362	yes
extract	Oniscus asellus	5	N2	L4	extract	DMSO	35	23	58	0.206897	yes
extract	Oniscus asellus	5	N2	L4	extract	EtOH	19	28	47	-0.191489	yes
extract	Oniscus asellus	5	N2	L4	extract	H2O	33	36	69	-0.0434783	yes
extract	Oniscus asellus	5	N2	L4	isoamylalc	DMSO	43	1	44	0.954545	yes
extract	Oniscus asellus	5	N2	L4	isoamylalc	EtOH	54	13	67	0.61194	yes
extract	Oniscus asellus	5	N2	L4	isoamylalc	H2O	66	9	75	0.76	yes
extract	Oniscus asellus	5	N2	L4	octanol	DMSO	1	35	36	-0.944444	yes
extract	Oniscus asellus	5	N2	L4	octanol	EtOH	2	40	42	-0.904762	yes
extract	Oniscus asellus	5	N2	L4	octanol	H2O	1	17	18	-0.888889	yes
extract	Oniscus asellus	6	MY2079	L4	extract	DMSO	49	41	90	0.0888889	yes
extract	Oniscus asellus	6	MY2079	L4	extract	EtOH	40	74	114	-0.298246	yes
extract	Oniscus asellus	6	MY2079	L4	extract	H2O	39	63	102	-0.235294	yes
extract	Oniscus asellus	6	MY2079	L4	isoamylalc	DMSO	110	21	131	0.679389	yes
extract	Oniscus asellus	6	MY2079	L4	isoamylalc	EtOH	98	16	114	0.719298	yes
extract	Oniscus asellus	6	MY2079	L4	isoamylalc	H2O	144	31	175	0.645714	yes
extract	Oniscus asellus	6	MY2079	L4	octanol	DMSO	31	50	81	-0.234568	yes
extract	Oniscus asellus	6	MY2079	L4	octanol	EtOH	7	72	79	-0.822785	yes
extract	Oniscus asellus	6	MY2079	L4	octanol	H2O	6	77	83	-0.855422	yes
extract	Oniscus asellus	6	N2	L4	extract	DMSO	61	22	83	0.46988	yes
extract	Oniscus asellus	6	N2	L4	extract	EtOH	45	48	93	-0.0322581	yes
extract	Oniscus asellus	6	N2	L4	extract	H2O	45	37	82	0.097561	yes
extract	Oniscus asellus	6	N2	L4	isoamylalc	DMSO	4	3	7	NA	no	threshold not reached, exclude
extract	Oniscus asellus	6	N2	L4	isoamylalc	EtOH	42	9	51	0.647059	yes
extract	Oniscus asellus	6	N2	L4	isoamylalc	H2O	7	8	15	-0.0666667	yes
extract	Oniscus asellus	6	N2	L4	octanol	DMSO	8	13	21	-0.238095	yes
extract	Oniscus asellus	6	N2	L4	octanol	EtOH	5	19	24	-0.583333	yes
extract	Oniscus asellus	6	N2	L4	octanol	H2O	2	14	16	-0.75	yes
extract	Oniscus asellus	7	MY2079	L4	extract	EtOH	23	26	49	-0.0612245	yes
extract	Oniscus asellus	7	MY2079	L4	extract	DMSO	34	31	65	0.0461538	yes
extract	Oniscus asellus	7	MY2079	L4	extract	H2O	22	35	57	-0.22807	yes
extract	Oniscus asellus	7	MY2079	L4	isoamylalc	EtOH	49	6	55	0.781818	yes
extract	Oniscus asellus	7	MY2079	L4	isoamylalc	DMSO	51	8	59	0.728814	yes
extract	Oniscus asellus	7	MY2079	L4	isoamylalc	H2O	31	13	44	0.409091	yes
extract	Oniscus asellus	7	MY2079	L4	octanol	EtOH	12	14	26	-0.0769231	yes
extract	Oniscus asellus	7	MY2079	L4	octanol	DMSO	31	30	61	0.0163934	yes
extract	Oniscus asellus	7	MY2079	L4	octanol	H2O	13	23	36	-0.277778	yes
extract	Oniscus asellus	7	N2	L4	extract	EtOH	35	43	78	-0.102564	yes
extract	Oniscus asellus	7	N2	L4	extract	DMSO	30	45	75	-0.2	yes
extract	Oniscus asellus	7	N2	L4	extract	H2O	37	47	84	-0.119048	yes
extract	Oniscus asellus	7	N2	L4	isoamylalc	EtOH	60	5	65	0.846154	yes
extract	Oniscus asellus	7	N2	L4	isoamylalc	DMSO	60	6	66	0.818182	yes
extract	Oniscus asellus	7	N2	L4	isoamylalc	H2O	67	6	73	0.835616	yes
extract	Oniscus asellus	7	N2	L4	octanol	EtOH	6	47	53	-0.773585	yes
extract	Oniscus asellus	7	N2	L4	octanol	DMSO	11	43	54	-0.592593	yes
extract	Oniscus asellus	7	N2	L4	octanol	H2O	3	52	55	-0.890909	yes
extract	Oniscus asellus	8	MY2079	L4	extract	H2O	22	36	58	-0.241379	yes
extract	Oniscus asellus	8	MY2079	L4	extract	DMSO	9	46	55	-0.672727	yes
extract	Oniscus asellus	8	MY2079	L4	extract	EtOH	36	26	62	0.16129	yes
extract	Oniscus asellus	8	MY2079	L4	isoamylalc	H2O	40	24	64	0.25	yes
extract	Oniscus asellus	8	MY2079	L4	isoamylalc	DMSO	50	24	74	0.351351	yes
extract	Oniscus asellus	8	MY2079	L4	isoamylalc	EtOH	60	25	85	0.411765	yes
extract	Oniscus asellus	8	MY2079	L4	octanol	H2O	2	52	54	-0.925926	yes
extract	Oniscus asellus	8	MY2079	L4	octanol	DMSO	3	58	61	-0.901639	yes
extract	Oniscus asellus	8	MY2079	L4	octanol	EtOH	6	69	75	-0.84	yes
extract	Oniscus asellus	8	N2	L4	extract	H2O	25	22	47	0.0638298	yes
extract	Oniscus asellus	8	N2	L4	extract	DMSO	18	21	39	-0.0769231	yes
extract	Oniscus asellus	8	N2	L4	extract	EtOH	21	16	37	0.135135	yes
extract	Oniscus asellus	8	N2	L4	isoamylalc	H2O	31	5	36	0.722222	yes
extract	Oniscus asellus	8	N2	L4	isoamylalc	DMSO	36	7	43	0.674419	yes
extract	Oniscus asellus	8	N2	L4	isoamylalc	EtOH	37	8	45	0.644444	yes
extract	Oniscus asellus	8	N2	L4	octanol	H2O	5	47	52	-0.807692	yes
extract	Oniscus asellus	8	N2	L4	octanol	DMSO	1	32	33	-0.939394	yes
extract	Oniscus asellus	8	N2	L4	octanol	EtOH	2	48	50	-0.92	yes
extract	Oniscus asellus	9	MY2079	L4	extract	EtOH	56	43	99	0.131313	yes
extract	Oniscus asellus	9	MY2079	L4	extract	H2O	43	50	93	-0.0752688	yes
extract	Oniscus asellus	9	MY2079	L4	extract	DMSO	38	75	113	-0.327434	yes
extract	Oniscus asellus	9	MY2079	L4	isoamylalc	EtOH	42	18	60	0.4	yes
extract	Oniscus asellus	9	MY2079	L4	isoamylalc	H2O	44	25	69	0.275362	yes
extract	Oniscus asellus	9	MY2079	L4	isoamylalc	DMSO	65	28	93	0.397849	yes
extract	Oniscus asellus	9	MY2079	L4	octanol	EtOH	8	55	63	-0.746032	yes
extract	Oniscus asellus	9	MY2079	L4	octanol	H2O	4	106	110	-0.927273	yes
extract	Oniscus asellus	9	MY2079	L4	octanol	DMSO	7	99	106	-0.867925	yes
extract	Oniscus asellus	9	N2	L4	extract	EtOH	56	58	114	-0.0175439	yes
extract	Oniscus asellus	9	N2	L4	extract	H2O	41	46	87	-0.0574713	yes
extract	Oniscus asellus	9	N2	L4	extract	DMSO	74	84	158	-0.0632911	yes
extract	Oniscus asellus	9	N2	L4	isoamylalc	EtOH	70	14	84	0.666667	yes
extract	Oniscus asellus	9	N2	L4	isoamylalc	H2O	64	3	67	0.910448	yes
extract	Oniscus asellus	9	N2	L4	isoamylalc	DMSO	135	26	161	0.677019	yes
extract	Oniscus asellus	9	N2	L4	octanol	EtOH	3	34	37	-0.837838	yes
extract	Oniscus asellus	9	N2	L4	octanol	H2O	7	46	53	-0.735849	yes
extract	Oniscus asellus	9	N2	L4	octanol	DMSO	5	65	70	-0.857143	yes
extract	Oniscus asellus	10	MY2079	L4	extract	H2O	41	52	93	-0.11828	yes
extract	Oniscus asellus	10	MY2079	L4	extract	EtOH	33	33	66	0	yes
extract	Oniscus asellus	10	MY2079	L4	extract	DMSO	32	31	63	0.015873	yes
extract	Oniscus asellus	10	MY2079	L4	isoamylalc	H2O	50	21	71	0.408451	yes
extract	Oniscus asellus	10	MY2079	L4	isoamylalc	EtOH	60	17	77	0.558442	yes
extract	Oniscus asellus	10	MY2079	L4	isoamylalc	DMSO	75	24	99	0.515152	yes
extract	Oniscus asellus	10	MY2079	L4	octanol	H2O	6	84	90	-0.866667	yes
extract	Oniscus asellus	10	MY2079	L4	octanol	EtOH	8	58	66	-0.757576	yes
extract	Oniscus asellus	10	MY2079	L4	octanol	DMSO	9	68	77	-0.766234	yes
extract	Oniscus asellus	10	N2	L4	extract	H2O	39	38	77	0.012987	yes
extract	Oniscus asellus	10	N2	L4	extract	EtOH	28	37	65	-0.138462	yes
extract	Oniscus asellus	10	N2	L4	extract	DMSO	20	30	50	-0.2	yes
extract	Oniscus asellus	10	N2	L4	isoamylalc	H2O	51	13	64	0.59375	yes
extract	Oniscus asellus	10	N2	L4	isoamylalc	EtOH	56	5	61	0.836066	yes
extract	Oniscus asellus	10	N2	L4	isoamylalc	DMSO	33	10	43	0.534884	yes
extract	Oniscus asellus	10	N2	L4	octanol	H2O	8	36	44	-0.636364	yes
extract	Oniscus asellus	10	N2	L4	octanol	EtOH	8	40	48	-0.666667	yes
extract	Oniscus asellus	10	N2	L4	octanol	DMSO	9	31	40	-0.55	yes

## Sheet: 2B Oniscus extract dauer
assay	invertebrate_species	rep	worm_strain	stage	choice_treat	solvent	count_treat	count_solvent	total	index	include	comments
extract	Oniscus asellus	1	MY2079	dauer	octanol	EtOH	14	26	40	-0.3	yes
extract	Oniscus asellus	1	MY2079	dauer	tissue	DMSO	21	20	41	0.0243902	yes
extract	Oniscus asellus	1	MY2079	dauer	octanol	H2O	22	29	51	-0.137255	yes
extract	Oniscus asellus	1	MY2079	dauer	octanol	DMSO	25	28	53	-0.0566038	yes
extract	Oniscus asellus	1	MY2079	dauer	tissue	EtOH	25	32	57	-0.122807	yes
extract	Oniscus asellus	1	MY2079	dauer	isoamylalc	EtOH	56	8	64	0.75	yes
extract	Oniscus asellus	1	MY2079	dauer	tissue	H2O	34	30	64	0.0625	yes
extract	Oniscus asellus	1	MY2079	dauer	isoamylalc	DMSO	61	5	66	0.848485	yes
extract	Oniscus asellus	1	MY2079	dauer	isoamylalc	H2O	59	12	71	0.661972	yes
extract	Oniscus asellus	1	N2	dauer	octanol	H2O	2	0	2	NA	no	treshold not reached, exclude
extract	Oniscus asellus	1	N2	dauer	tissue	DMSO	1	1	2	NA	no	treshold not reached, exclude
extract	Oniscus asellus	1	N2	dauer	octanol	DMSO	5	10	15	-0.333333	yes
extract	Oniscus asellus	1	N2	dauer	tissue	EtOH	8	8	16	0	yes
extract	Oniscus asellus	1	N2	dauer	octanol	EtOH	10	7	17	0.176471	yes
extract	Oniscus asellus	1	N2	dauer	isoamylalc	H2O	14	8	22	0.272727	yes
extract	Oniscus asellus	1	N2	dauer	isoamylalc	EtOH	19	4	23	0.652174	yes
extract	Oniscus asellus	1	N2	dauer	tissue	H2O	15	16	31	-0.0322581	yes
extract	Oniscus asellus	1	N2	dauer	isoamylalc	DMSO	29	4	33	0.757576	yes
extract	Oniscus asellus	2	MY2079	dauer	isoamylalc	H2O	32	12	44	0.454545	yes
extract	Oniscus asellus	2	MY2079	dauer	tissue	DMSO	22	28	50	-0.12	yes
extract	Oniscus asellus	2	MY2079	dauer	octanol	DMSO	24	28	52	-0.0769231	yes
extract	Oniscus asellus	2	MY2079	dauer	tissue	EtOH	25	28	53	-0.0566038	yes
extract	Oniscus asellus	2	MY2079	dauer	octanol	H2O	18	40	58	-0.37931	yes
extract	Oniscus asellus	2	MY2079	dauer	isoamylalc	EtOH	38	22	60	0.266667	yes
extract	Oniscus asellus	2	MY2079	dauer	octanol	EtOH	18	53	71	-0.492958	yes
extract	Oniscus asellus	2	MY2079	dauer	isoamylalc	DMSO	50	22	72	0.388889	yes
extract	Oniscus asellus	2	MY2079	dauer	tissue	H2O	44	31	75	0.173333	yes
extract	Oniscus asellus	2	N2	dauer	tissue	H2O	1	1	2	NA	no	treshold not reached, exclude
extract	Oniscus asellus	2	N2	dauer	isoamylalc	H2O	3	1	4	NA	no	treshold not reached, exclude
extract	Oniscus asellus	2	N2	dauer	octanol	DMSO	1	3	4	NA	no	treshold not reached, exclude
extract	Oniscus asellus	2	N2	dauer	octanol	EtOH	3	1	4	NA	no	treshold not reached, exclude
extract	Oniscus asellus	2	N2	dauer	octanol	H2O	2	2	4	NA	no	treshold not reached, exclude
extract	Oniscus asellus	2	N2	dauer	tissue	EtOH	1	3	4	NA	no	treshold not reached, exclude
extract	Oniscus asellus	2	N2	dauer	isoamylalc	EtOH	6	2	8	NA	no	treshold not reached, exclude
extract	Oniscus asellus	2	N2	dauer	tissue	DMSO	4	4	8	NA	no	treshold not reached, exclude
extract	Oniscus asellus	2	N2	dauer	isoamylalc	DMSO	4	6	10	-0.2	yes
extract	Oniscus asellus	3	MY2079	dauer	tissue	DMSO	14	13	27	0.037037	yes
extract	Oniscus asellus	3	MY2079	dauer	octanol	EtOH	17	26	43	-0.209302	yes
extract	Oniscus asellus	3	MY2079	dauer	octanol	DMSO	17	28	45	-0.244444	yes
extract	Oniscus asellus	3	MY2079	dauer	octanol	H2O	25	27	52	-0.0384615	yes
extract	Oniscus asellus	3	MY2079	dauer	isoamylalc	DMSO	50	8	58	0.724138	yes
extract	Oniscus asellus	3	MY2079	dauer	tissue	H2O	28	30	58	-0.0344828	yes
extract	Oniscus asellus	3	MY2079	dauer	isoamylalc	H2O	48	11	59	0.627119	yes
extract	Oniscus asellus	3	MY2079	dauer	tissue	EtOH	24	38	62	-0.225806	yes
extract	Oniscus asellus	3	MY2079	dauer	isoamylalc	EtOH	56	13	69	0.623188	yes
extract	Oniscus asellus	3	N2	dauer	tissue	DMSO	1	0	1	NA	no	treshold not reached, exclude
extract	Oniscus asellus	3	N2	dauer	isoamylalc	H2O	2	0	2	NA	no	treshold not reached, exclude
extract	Oniscus asellus	3	N2	dauer	tissue	EtOH	2	1	3	NA	no	treshold not reached, exclude
extract	Oniscus asellus	3	N2	dauer	isoamylalc	EtOH	3	1	4	NA	no	treshold not reached, exclude
extract	Oniscus asellus	3	N2	dauer	tissue	H2O	1	3	4	NA	no	treshold not reached, exclude
extract	Oniscus asellus	3	N2	dauer	octanol	DMSO	2	3	5	NA	no	treshold not reached, exclude
extract	Oniscus asellus	3	N2	dauer	octanol	EtOH	1	6	7	NA	no	treshold not reached, exclude
extract	Oniscus asellus	3	N2	dauer	octanol	H2O	7	1	8	NA	no	treshold not reached, exclude
extract	Oniscus asellus	3	N2	dauer	isoamylalc	DMSO	9	2	11	0.636364	yes
extract	Oniscus asellus	4	MY2079	dauer	tissue	EtOH	19	22	41	-0.0731707	yes
extract	Oniscus asellus	4	MY2079	dauer	isoamylalc	DMSO	33	12	45	0.466667	yes
extract	Oniscus asellus	4	MY2079	dauer	isoamylalc	H2O	29	20	49	0.183673	yes
extract	Oniscus asellus	4	MY2079	dauer	tissue	DMSO	18	31	49	-0.265306	yes
extract	Oniscus asellus	4	MY2079	dauer	tissue	H2O	14	35	49	-0.428571	yes
extract	Oniscus asellus	4	MY2079	dauer	octanol	H2O	9	43	52	-0.653846	yes
extract	Oniscus asellus	4	MY2079	dauer	octanol	EtOH	14	39	53	-0.471698	yes
extract	Oniscus asellus	4	MY2079	dauer	octanol	DMSO	3	51	54	-0.888889	yes
extract	Oniscus asellus	4	MY2079	dauer	isoamylalc	EtOH	50	15	65	0.538462	yes
extract	Oniscus asellus	4	N2	dauer	isoamylalc	DMSO	0	0	0	NA	no	treshold not reached, exclude
extract	Oniscus asellus	4	N2	dauer	isoamylalc	EtOH	1	0	1	NA	no	treshold not reached, exclude
extract	Oniscus asellus	4	N2	dauer	isoamylalc	H2O	1	0	1	NA	no	treshold not reached, exclude
extract	Oniscus asellus	4	N2	dauer	octanol	DMSO	1	0	1	NA	no	treshold not reached, exclude
extract	Oniscus asellus	4	N2	dauer	tissue	EtOH	0	1	1	NA	no	treshold not reached, exclude
extract	Oniscus asellus	4	N2	dauer	tissue	H2O	2	1	3	NA	no	treshold not reached, exclude
extract	Oniscus asellus	4	N2	dauer	octanol	EtOH	2	3	5	NA	no	treshold not reached, exclude
extract	Oniscus asellus	4	N2	dauer	octanol	H2O	3	5	8	NA	no	treshold not reached, exclude
extract	Oniscus asellus	4	N2	dauer	tissue	DMSO	4	4	8	NA	no	treshold not reached, exclude
extract	Oniscus asellus	5	MY2079	dauer	isoamylalc	H2O	63	17	80	0.575	yes
extract	Oniscus asellus	5	MY2079	dauer	octanol	H2O	29	51	80	-0.275	yes
extract	Oniscus asellus	5	MY2079	dauer	isoamylalc	DMSO	79	23	102	0.54902	yes
extract	Oniscus asellus	5	MY2079	dauer	octanol	EtOH	41	63	104	-0.211538	yes
extract	Oniscus asellus	5	MY2079	dauer	octanol	DMSO	50	60	110	-0.0909091	yes
extract	Oniscus asellus	5	MY2079	dauer	tissue	H2O	54	57	111	-0.027027	yes
extract	Oniscus asellus	5	MY2079	dauer	tissue	DMSO	69	68	137	0.00729927	yes
extract	Oniscus asellus	5	MY2079	dauer	isoamylalc	EtOH	111	38	149	0.489933	yes
extract	Oniscus asellus	5	MY2079	dauer	tissue	EtOH	63	90	153	-0.176471	yes
extract	Oniscus asellus	5	N2	dauer	isoamylalc	H2O	1	0	1	NA	no	treshold not reached, exclude
extract	Oniscus asellus	5	N2	dauer	isoamylalc	DMSO	1	2	3	NA	no	treshold not reached, exclude
extract	Oniscus asellus	5	N2	dauer	tissue	EtOH	4	0	4	NA	no	treshold not reached, exclude
extract	Oniscus asellus	5	N2	dauer	tissue	H2O	1	3	4	NA	no	treshold not reached, exclude
extract	Oniscus asellus	5	N2	dauer	isoamylalc	EtOH	3	4	7	NA	no	treshold not reached, exclude
extract	Oniscus asellus	5	N2	dauer	tissue	DMSO	1	6	7	NA	no	treshold not reached, exclude
extract	Oniscus asellus	5	N2	dauer	octanol	DMSO	5	9	14	-0.285714	yes
extract	Oniscus asellus	5	N2	dauer	octanol	EtOH	7	7	14	0	yes
extract	Oniscus asellus	5	N2	dauer	octanol	H2O	7	8	15	-0.0666667	yes
extract	Oniscus asellus	6	MY2079	dauer	isoamylalc	DMSO	101	24	125	0	yes
extract	Oniscus asellus	6	MY2079	dauer	octanol	H2O	62	75	137	-0.0948905	yes
extract	Oniscus asellus	6	MY2079	dauer	isoamylalc	H2O	106	36	142	0.492958	yes
extract	Oniscus asellus	6	MY2079	dauer	isoamylalc	EtOH	104	57	161	0.291925	yes
extract	Oniscus asellus	6	MY2079	dauer	tissue	DMSO	90	77	167	0.0778443	yes
extract	Oniscus asellus	6	MY2079	dauer	tissue	EtOH	70	105	175	-0.2	yes
extract	Oniscus asellus	6	MY2079	dauer	octanol	EtOH	78	106	184	-0.152174	yes
extract	Oniscus asellus	6	MY2079	dauer	octanol	DMSO	90	122	212	-0.150943	yes
extract	Oniscus asellus	6	MY2079	dauer	tissue	H2O	86	142	228	-0.245614	yes
extract	Oniscus asellus	6	N2	dauer	octanol	H2O	2	2	4	NA	no	treshold not reached, exclude
extract	Oniscus asellus	6	N2	dauer	octanol	DMSO	2	3	5	NA	no	treshold not reached, exclude
extract	Oniscus asellus	6	N2	dauer	tissue	H2O	5	2	7	NA	no	treshold not reached, exclude
extract	Oniscus asellus	6	N2	dauer	isoamylalc	H2O	7	1	8	NA	no	treshold not reached, exclude
extract	Oniscus asellus	6	N2	dauer	isoamylalc	DMSO	4	6	10	-0.2	yes
extract	Oniscus asellus	6	N2	dauer	tissue	DMSO	7	3	10	0.4	yes
extract	Oniscus asellus	6	N2	dauer	isoamylalc	EtOH	10	4	14	0.428571	yes
extract	Oniscus asellus	6	N2	dauer	octanol	EtOH	11	6	17	0.294118	yes
extract	Oniscus asellus	6	N2	dauer	tissue	EtOH	10	7	17	0.176471	yes
extract	Oniscus asellus	7	MY2079	dauer	tissue	H2O	4	4	8	NA	no	treshold not reached, exclude
extract	Oniscus asellus	7	MY2079	dauer	isoamylalc	H2O	8	2	10	0.6	yes
extract	Oniscus asellus	7	MY2079	dauer	octanol	EtOH	4	9	13	-0.384615	yes
extract	Oniscus asellus	7	MY2079	dauer	octanol	DMSO	10	10	20	0	yes
extract	Oniscus asellus	7	MY2079	dauer	octanol	H2O	10	14	24	-0.166667	yes
extract	Oniscus asellus	7	MY2079	dauer	isoamylalc	EtOH	21	4	25	0.68	yes
extract	Oniscus asellus	7	MY2079	dauer	tissue	DMSO	17	9	26	0.307692	yes
extract	Oniscus asellus	7	MY2079	dauer	isoamylalc	DMSO	21	8	29	0.448276	yes
extract	Oniscus asellus	7	MY2079	dauer	tissue	EtOH	11	19	30	-0.266667	yes
extract	Oniscus asellus	7	N2	dauer	isoamylalc	H2O	0	0	0	NA	no	treshold not reached, exclude
extract	Oniscus asellus	7	N2	dauer	octanol	H2O	1	3	4	NA	no	treshold not reached, exclude
extract	Oniscus asellus	7	N2	dauer	isoamylalc	EtOH	1	5	6	NA	no	treshold not reached, exclude
extract	Oniscus asellus	7	N2	dauer	octanol	DMSO	2	4	6	NA	no	treshold not reached, exclude
extract	Oniscus asellus	7	N2	dauer	tissue	DMSO	3	4	7	NA	no	treshold not reached, exclude
extract	Oniscus asellus	7	N2	dauer	tissue	H2O	5	3	8	NA	no	treshold not reached, exclude
extract	Oniscus asellus	7	N2	dauer	isoamylalc	DMSO	6	4	10	0.2	yes
extract	Oniscus asellus	7	N2	dauer	tissue	EtOH	9	1	10	0.8	yes
extract	Oniscus asellus	7	N2	dauer	octanol	EtOH	10	19	29	-0.310345	yes
extract	Oniscus asellus	8	MY2079	dauer	isoamylalc	DMSO	60	18	78	0.538462	yes
extract	Oniscus asellus	8	MY2079	dauer	octanol	H2O	42	40	82	0.0243902	yes
extract	Oniscus asellus	8	MY2079	dauer	isoamylalc	H2O	74	16	90	0.644444	yes
extract	Oniscus asellus	8	MY2079	dauer	octanol	EtOH	46	47	93	-0.0107527	yes
extract	Oniscus asellus	8	MY2079	dauer	tissue	H2O	58	56	114	0.0175439	yes
extract	Oniscus asellus	8	MY2079	dauer	isoamylalc	EtOH	94	24	118	0.59322	yes
extract	Oniscus asellus	8	MY2079	dauer	tissue	DMSO	70	55	125	0.12	yes
extract	Oniscus asellus	8	MY2079	dauer	tissue	EtOH	75	56	131	0.145038	yes
extract	Oniscus asellus	8	MY2079	dauer	octanol	DMSO	61	74	135	-0.0962963	yes
extract	Oniscus asellus	8	N2	dauer	octanol	H2O	4	9	13	-0.384615	yes
extract	Oniscus asellus	8	N2	dauer	isoamylalc	EtOH	11	8	19	0.157895	yes
extract	Oniscus asellus	8	N2	dauer	octanol	EtOH	11	13	24	-0.0833333	yes
extract	Oniscus asellus	8	N2	dauer	tissue	H2O	13	11	24	0.0833333	yes
extract	Oniscus asellus	8	N2	dauer	octanol	DMSO	12	13	25	-0.04	yes
extract	Oniscus asellus	8	N2	dauer	isoamylalc	DMSO	17	13	30	0.133333	yes
extract	Oniscus asellus	8	N2	dauer	tissue	EtOH	15	19	34	-0.117647	yes
extract	Oniscus asellus	8	N2	dauer	tissue	DMSO	15	22	37	-0.189189	yes
extract	Oniscus asellus	8	N2	dauer	isoamylalc	H2O	33	15	48	0.375	yes
extract	Oniscus asellus	9	MY2079	dauer	octanol	DMSO	81	116	197	-0.177665	yes
extract	Oniscus asellus	9	MY2079	dauer	isoamylalc	EtOH	132	116	248	0.0645161	yes
extract	Oniscus asellus	9	MY2079	dauer	tissue	DMSO	110	143	253	-0.130435	yes
extract	Oniscus asellus	9	MY2079	dauer	octanol	H2O	125	138	263	-0.0494297	yes
extract	Oniscus asellus	9	MY2079	dauer	tissue	EtOH	133	135	268	-0.00746269	yes
extract	Oniscus asellus	9	MY2079	dauer	isoamylalc	H2O	160	122	282	0.134752	yes
extract	Oniscus asellus	9	MY2079	dauer	octanol	EtOH	134	182	316	-0.151899	yes
extract	Oniscus asellus	9	MY2079	dauer	isoamylalc	DMSO	192	125	317	0.211356	yes
extract	Oniscus asellus	9	MY2079	dauer	tissue	H2O	121	201	322	-0.248447	yes
extract	Oniscus asellus	9	N2	dauer	tissue	DMSO	14	6	20	0.4	yes
extract	Oniscus asellus	9	N2	dauer	octanol	DMSO	18	9	27	0.333333	yes
extract	Oniscus asellus	9	N2	dauer	isoamylalc	H2O	19	17	36	0.0555556	yes
extract	Oniscus asellus	9	N2	dauer	tissue	H2O	18	18	36	0	yes
extract	Oniscus asellus	9	N2	dauer	tissue	EtOH	16	21	37	-0.135135	yes
extract	Oniscus asellus	9	N2	dauer	isoamylalc	DMSO	27	14	41	0.317073	yes
extract	Oniscus asellus	9	N2	dauer	isoamylalc	EtOH	34	21	55	0.236364	yes
extract	Oniscus asellus	9	N2	dauer	octanol	H2O	25	31	56	-0.107143	yes
extract	Oniscus asellus	9	N2	dauer	octanol	EtOH	22	35	57	-0.22807	yes
extract	Oniscus asellus	10	MY2079	dauer	octanol	H2O	98	120	218	-0.100917	yes
extract	Oniscus asellus	10	MY2079	dauer	isoamylalc	EtOH	104	142	246	-0.154472	yes
extract	Oniscus asellus	10	MY2079	dauer	octanol	DMSO	81	173	254	-0.362205	yes
extract	Oniscus asellus	10	MY2079	dauer	octanol	EtOH	118	161	279	-0.154122	yes
extract	Oniscus asellus	10	MY2079	dauer	isoamylalc	DMSO	163	118	281	0.160142	yes
extract	Oniscus asellus	10	MY2079	dauer	tissue	DMSO	144	152	296	-0.027027	yes
extract	Oniscus asellus	10	MY2079	dauer	tissue	EtOH	144	174	318	-0.0943396	yes
extract	Oniscus asellus	10	MY2079	dauer	isoamylalc	H2O	160	167	327	-0.0214067	yes
extract	Oniscus asellus	10	MY2079	dauer	tissue	H2O	200	210	410	-0.0243902	yes
extract	Oniscus asellus	10	N2	dauer	tissue	H2O	7	6	13	0.0769231	yes
extract	Oniscus asellus	10	N2	dauer	isoamylalc	DMSO	8	7	15	0.0666667	yes
extract	Oniscus asellus	10	N2	dauer	isoamylalc	H2O	13	7	20	0.3	yes
extract	Oniscus asellus	10	N2	dauer	octanol	DMSO	9	11	20	-0.1	yes
extract	Oniscus asellus	10	N2	dauer	octanol	H2O	9	11	20	-0.1	yes
extract	Oniscus asellus	10	N2	dauer	tissue	DMSO	10	10	20	0	yes
extract	Oniscus asellus	10	N2	dauer	isoamylalc	EtOH	12	12	24	0	yes
extract	Oniscus asellus	10	N2	dauer	tissue	EtOH	12	18	30	-0.2	yes
extract	Oniscus asellus	10	N2	dauer	octanol	EtOH	22	40	62	-0.290323	yes
extract	Oniscus asellus	11	MY2079	dauer	isoamylalc	EtOH	80	91	171	-0.0643275	yes
extract	Oniscus asellus	11	MY2079	dauer	octanol	EtOH	81	130	211	-0.232227	yes
extract	Oniscus asellus	11	MY2079	dauer	tissue	EtOH	108	104	212	0.0188679	yes
extract	Oniscus asellus	11	MY2079	dauer	tissue	DMSO	125	104	229	0.0917031	yes
extract	Oniscus asellus	11	MY2079	dauer	isoamylalc	H2O	137	111	248	0.104839	yes
extract	Oniscus asellus	11	MY2079	dauer	octanol	DMSO	139	129	268	0.0373134	yes
extract	Oniscus asellus	11	MY2079	dauer	octanol	H2O	135	148	283	-0.0459364	yes
extract	Oniscus asellus	11	MY2079	dauer	isoamylalc	DMSO	172	128	300	0.146667	yes
extract	Oniscus asellus	11	MY2079	dauer	tissue	H2O	148	167	315	-0.0603175	yes
extract	Oniscus asellus	11	N2	dauer	octanol	EtOH	12	9	21	0.142857	yes
extract	Oniscus asellus	11	N2	dauer	isoamylalc	H2O	14	8	22	0.272727	yes
extract	Oniscus asellus	11	N2	dauer	octanol	H2O	11	11	22	0	yes
extract	Oniscus asellus	11	N2	dauer	tissue	DMSO	11	13	24	-0.0833333	yes
extract	Oniscus asellus	11	N2	dauer	octanol	DMSO	11	14	25	-0.12	yes
extract	Oniscus asellus	11	N2	dauer	tissue	EtOH	16	9	25	0.28	yes
extract	Oniscus asellus	11	N2	dauer	tissue	H2O	15	10	25	0.2	yes
extract	Oniscus asellus	11	N2	dauer	isoamylalc	EtOH	15	16	31	-0.0322581	yes
extract	Oniscus asellus	11	N2	dauer	isoamylalc	DMSO	27	14	41	0.317073	yes
extract	Oniscus asellus	12	MY2079	dauer	octanol	EtOH	26	62	88	-0.409091	yes
extract	Oniscus asellus	12	MY2079	dauer	octanol	H2O	35	57	92	-0.23913	yes
extract	Oniscus asellus	12	MY2079	dauer	isoamylalc	H2O	76	42	118	0.288136	yes
extract	Oniscus asellus	12	MY2079	dauer	isoamylalc	EtOH	83	64	147	0.129252	yes
extract	Oniscus asellus	12	MY2079	dauer	octanol	DMSO	56	96	152	-0.263158	yes
extract	Oniscus asellus	12	MY2079	dauer	isoamylalc	DMSO	107	63	170	0.258824	yes
extract	Oniscus asellus	12	MY2079	dauer	tissue	H2O	87	100	187	-0.0695187	yes
extract	Oniscus asellus	12	MY2079	dauer	tissue	DMSO	109	108	217	0.00460829	yes
extract	Oniscus asellus	12	MY2079	dauer	tissue	EtOH	119	116	235	0.012766	yes
extract	Oniscus asellus	12	N2	dauer	isoamylalc	EtOH	4	4	8	NA	no	treshold not reached, exclude
extract	Oniscus asellus	12	N2	dauer	tissue	H2O	5	7	12	-0.166667	yes
extract	Oniscus asellus	12	N2	dauer	isoamylalc	DMSO	7	6	13	0.0769231	yes
extract	Oniscus asellus	12	N2	dauer	tissue	DMSO	12	4	16	0.5	yes
extract	Oniscus asellus	12	N2	dauer	isoamylalc	H2O	9	9	18	0	yes
extract	Oniscus asellus	12	N2	dauer	tissue	EtOH	10	13	23	-0.130435	yes
extract	Oniscus asellus	12	N2	dauer	octanol	H2O	14	18	32	-0.125	yes
extract	Oniscus asellus	12	N2	dauer	octanol	EtOH	19	26	45	-0.155556	yes
extract	Oniscus asellus	12	N2	dauer	octanol	DMSO	36	29	65	0.107692	yes
extract	Oniscus asellus	13	MY2079	dauer	octanol	H2O	43	47	90	-0.0444444	yes
extract	Oniscus asellus	13	MY2079	dauer	tissue	EtOH	38	54	92	-0.173913	yes
extract	Oniscus asellus	13	MY2079	dauer	octanol	EtOH	47	56	103	-0.0873786	yes
extract	Oniscus asellus	13	MY2079	dauer	tissue	H2O	50	61	111	-0.0990991	yes
extract	Oniscus asellus	13	MY2079	dauer	isoamylalc	DMSO	92	33	125	0.472	yes
extract	Oniscus asellus	13	MY2079	dauer	isoamylalc	H2O	99	29	128	0.546875	yes
extract	Oniscus asellus	13	MY2079	dauer	octanol	DMSO	49	83	132	-0.257576	yes
extract	Oniscus asellus	13	MY2079	dauer	tissue	DMSO	59	82	141	-0.163121	yes
extract	Oniscus asellus	13	MY2079	dauer	isoamylalc	EtOH	145	38	183	0.584699	yes
extract	Oniscus asellus	13	N2	dauer	isoamylalc	H2O	8	5	13	0.230769	yes
extract	Oniscus asellus	13	N2	dauer	isoamylalc	EtOH	8	7	15	0.0666667	yes
extract	Oniscus asellus	13	N2	dauer	octanol	DMSO	5	10	15	-0.333333	yes
extract	Oniscus asellus	13	N2	dauer	isoamylalc	DMSO	8	8	16	0	yes
extract	Oniscus asellus	13	N2	dauer	octanol	H2O	9	8	17	0.0588235	yes
extract	Oniscus asellus	13	N2	dauer	tissue	H2O	10	7	17	0.176471	yes
extract	Oniscus asellus	13	N2	dauer	tissue	DMSO	11	8	19	0.157895	yes
extract	Oniscus asellus	13	N2	dauer	tissue	EtOH	3	16	19	-0.684211	yes
extract	Oniscus asellus	13	N2	dauer	octanol	EtOH	8	12	20	-0.2	yes
extract	Oniscus asellus	14	N2	dauer	tissue	H2O	4	7	11	-0.272727	yes
extract	Oniscus asellus	14	N2	dauer	isoamylalc	H2O	4	6	10	-0.2	yes
extract	Oniscus asellus	14	N2	dauer	octanol	H2O	8	6	14	0.142857	yes
extract	Oniscus asellus	14	N2	dauer	tissue	DMSO	3	5	8	NA	no	treshold not reached, exclude
extract	Oniscus asellus	14	N2	dauer	isoamylalc	DMSO	7	6	13	0.0769231	yes
extract	Oniscus asellus	14	N2	dauer	octanol	DMSO	15	24	39	-0.230769	yes
extract	Oniscus asellus	14	N2	dauer	tissue	EtOH	7	6	13	0.0769231	yes
extract	Oniscus asellus	14	N2	dauer	isoamylalc	EtOH	12	5	17	0.411765	yes
extract	Oniscus asellus	14	N2	dauer	octanol	EtOH	7	14	21	-0.333333	yes
extract	Oniscus asellus	15	N2	dauer	tissue	H2O	5	5	10	0	yes
extract	Oniscus asellus	15	N2	dauer	isoamylalc	H2O	4	11	15	-0.466667	yes
extract	Oniscus asellus	15	N2	dauer	octanol	H2O	12	15	27	-0.111111	yes
extract	Oniscus asellus	15	N2	dauer	tissue	DMSO	4	5	9	NA	no	treshold not reached, exclude
extract	Oniscus asellus	15	N2	dauer	isoamylalc	DMSO	6	10	16	-0.25	yes
extract	Oniscus asellus	15	N2	dauer	octanol	DMSO	14	7	21	0.333333	yes
extract	Oniscus asellus	15	N2	dauer	tissue	EtOH	4	9	13	-0.384615	yes
extract	Oniscus asellus	15	N2	dauer	isoamylalc	EtOH	6	3	9	NA	no	treshold not reached, exclude
extract	Oniscus asellus	15	N2	dauer	octanol	EtOH	20	20	40	0	yes
extract	Oniscus asellus	16	MY2079	dauer	octanol	DMSO	104	98	202	0.029703	yes
extract	Oniscus asellus	16	MY2079	dauer	isoamylalc	DMSO	124	38	162	0.530864	yes
extract	Oniscus asellus	16	MY2079	dauer	tissue	DMSO	85	67	152	0.118421	yes
extract	Oniscus asellus	16	MY2079	dauer	octanol	H2O	57	70	127	-0.102362	yes
extract	Oniscus asellus	16	MY2079	dauer	isoamylalc	H2O	155	41	196	0.581633	yes
extract	Oniscus asellus	16	MY2079	dauer	tissue	H2O	97	89	186	0.0430108	yes
extract	Oniscus asellus	16	MY2079	dauer	octanol	EtOH	7	126	133	-0.894737	yes
extract	Oniscus asellus	16	MY2079	dauer	isoamylalc	EtOH	120	45	165	0.454545	yes
extract	Oniscus asellus	16	MY2079	dauer	tissue	EtOH	59	99	158	-0.253165	yes
extract	Oniscus asellus	16	N2	dauer	octanol	DMSO	15	21	36	-0.166667	yes
extract	Oniscus asellus	16	N2	dauer	isoamylalc	DMSO	23	26	49	-0.0612245	yes
extract	Oniscus asellus	16	N2	dauer	tissue	DMSO	18	14	32	0.125	yes
extract	Oniscus asellus	16	N2	dauer	octanol	H2O	27	24	51	0.0588235	yes
extract	Oniscus asellus	16	N2	dauer	isoamylalc	H2O	17	17	34	0	yes
extract	Oniscus asellus	16	N2	dauer	tissue	H2O	19	19	38	0	yes
extract	Oniscus asellus	16	N2	dauer	octanol	EtOH	27	27	54	0	yes
extract	Oniscus asellus	16	N2	dauer	isoamylalc	EtOH	18	10	28	0.285714	yes
extract	Oniscus asellus	16	N2	dauer	tissue	EtOH	21	23	44	-0.0454545	yes
extract	Oniscus asellus	17	MY2079	dauer	octanol	DMSO	63	69	132	-0.0454545	yes
extract	Oniscus asellus	17	MY2079	dauer	isoamylalc	DMSO	89	19	108	0.648148	yes
extract	Oniscus asellus	17	MY2079	dauer	tissue	DMSO	52	50	102	0.0196078	yes
extract	Oniscus asellus	17	MY2079	dauer	octanol	H2O	61	88	149	-0.181208	yes
extract	Oniscus asellus	17	MY2079	dauer	isoamylalc	H2O	103	21	124	0.66129	yes
extract	Oniscus asellus	17	MY2079	dauer	tissue	H2O	46	41	87	0.0574713	yes
extract	Oniscus asellus	17	MY2079	dauer	octanol	EtOH	95	88	183	0.0382514	yes
extract	Oniscus asellus	17	MY2079	dauer	isoamylalc	EtOH	121	22	143	0.692308	yes
extract	Oniscus asellus	17	MY2079	dauer	tissue	EtOH	39	80	119	-0.344538	yes
extract	Oniscus asellus	17	N2	dauer	octanol	DMSO	16	17	33	-0.030303	yes
extract	Oniscus asellus	17	N2	dauer	isoamylalc	DMSO	14	13	27	0.037037	yes
extract	Oniscus asellus	17	N2	dauer	tissue	DMSO	11	12	23	-0.0434783	yes
extract	Oniscus asellus	17	N2	dauer	octanol	H2O	13	19	32	-0.1875	yes
extract	Oniscus asellus	17	N2	dauer	isoamylalc	H2O	36	16	52	0.384615	yes
extract	Oniscus asellus	17	N2	dauer	tissue	H2O	9	5	14	0.285714	yes
extract	Oniscus asellus	17	N2	dauer	octanol	EtOH	21	15	36	0.166667	yes
extract	Oniscus asellus	17	N2	dauer	isoamylalc	EtOH	20	13	33	0.212121	yes
extract	Oniscus asellus	17	N2	dauer	tissue	EtOH	10	11	21	-0.047619	yes

## Sheet: 2C P. scaber extract L4
assay	invertebrate_species	rep	worm_strain	stage	choice_treat	solvent	count_treat	count_solvent	total	index	include	comments
extract	Porcellio scaber	1	MY2079	L4	isoamylalc	DMSO	32	7	39	0.641026	yes
extract	Porcellio scaber	1	MY2079	L4	octanol	DMSO	2	29	31	-0.870968	yes
extract	Porcellio scaber	1	MY2079	L4	extract	DMSO	13	17	30	-0.133333	yes
extract	Porcellio scaber	1	MY2079	L4	isoamylalc	EtOH	34	7	41	0.658537	yes
extract	Porcellio scaber	1	MY2079	L4	octanol	EtOH	1	39	40	-0.95	yes
extract	Porcellio scaber	1	MY2079	L4	extract	EtOH	10	11	21	-0.047619	yes
extract	Porcellio scaber	1	MY2079	L4	isoamylalc	H2O	43	7	50	0.72	yes
extract	Porcellio scaber	1	MY2079	L4	extract	H2O	13	17	30	-0.133333	yes
extract	Porcellio scaber	1	N2	L4	isoamylalc	DMSO	37	3	40	0.85	yes
extract	Porcellio scaber	1	N2	L4	octanol	DMSO	3	17	20	-0.7	yes
extract	Porcellio scaber	1	N2	L4	extract	DMSO	7	19	26	-0.461538	yes
extract	Porcellio scaber	1	N2	L4	isoamylalc	EtOH	48	3	51	0.882353	yes
extract	Porcellio scaber	1	N2	L4	octanol	EtOH	5	19	24	-0.583333	yes
extract	Porcellio scaber	1	N2	L4	extract	EtOH	12	34	46	-0.478261	yes
extract	Porcellio scaber	1	N2	L4	isoamylalc	H2O	35	0	35	1	yes
extract	Porcellio scaber	1	N2	L4	octanol	H2O	7	30	37	-0.621622	yes
extract	Porcellio scaber	1	N2	L4	extract	H2O	9	19	28	-0.357143	yes
extract	Porcellio scaber	2	MY2079	L4	isoamylalc	DMSO	48	13	61	0.57377	yes
extract	Porcellio scaber	2	MY2079	L4	octanol	DMSO	3	30	33	-0.818182	yes
extract	Porcellio scaber	2	MY2079	L4	extract	DMSO	25	41	66	-0.242424	yes
extract	Porcellio scaber	2	MY2079	L4	isoamylalc	EtOH	54	10	64	0.6875	yes
extract	Porcellio scaber	2	MY2079	L4	octanol	EtOH	10	59	69	-0.710145	yes
extract	Porcellio scaber	2	MY2079	L4	extract	EtOH	23	35	58	-0.206897	yes
extract	Porcellio scaber	2	MY2079	L4	isoamylalc	H2O	21	11	32	0.3125	yes
extract	Porcellio scaber	2	MY2079	L4	octanol	H2O	4	60	64	-0.875	yes
extract	Porcellio scaber	2	MY2079	L4	extract	H2O	43	49	92	-0.0652174	yes
extract	Porcellio scaber	2	N2	L4	isoamylalc	DMSO	50	1	51	0.960784	yes
extract	Porcellio scaber	2	N2	L4	octanol	DMSO	6	32	38	-0.684211	yes
extract	Porcellio scaber	2	N2	L4	extract	DMSO	19	31	50	-0.24	yes
extract	Porcellio scaber	2	N2	L4	isoamylalc	EtOH	65	6	71	0.830986	yes
extract	Porcellio scaber	2	N2	L4	octanol	EtOH	3	11	14	-0.571429	yes
extract	Porcellio scaber	2	N2	L4	extract	EtOH	16	17	33	-0.030303	yes
extract	Porcellio scaber	2	N2	L4	isoamylalc	H2O	56	1	57	0.964912	yes
extract	Porcellio scaber	2	N2	L4	octanol	H2O	10	47	57	-0.649123	yes
extract	Porcellio scaber	2	N2	L4	extract	H2O	10	17	27	-0.259259	yes
extract	Porcellio scaber	3	MY2079	L4	isoamylalc	DMSO	32	4	36	0.777778	yes
extract	Porcellio scaber	3	MY2079	L4	octanol	DMSO	5	52	57	-0.824561	yes
extract	Porcellio scaber	3	MY2079	L4	extract	DMSO	14	21	35	-0.2	yes
extract	Porcellio scaber	3	MY2079	L4	isoamylalc	EtOH	35	5	40	0.75	yes
extract	Porcellio scaber	3	MY2079	L4	octanol	EtOH	2	56	58	-0.931034	yes
extract	Porcellio scaber	3	MY2079	L4	extract	EtOH	21	24	45	-0.0666667	yes
extract	Porcellio scaber	3	MY2079	L4	isoamylalc	H2O	27	6	33	0.636364	yes
extract	Porcellio scaber	3	MY2079	L4	octanol	H2O	1	41	42	-0.952381	yes
extract	Porcellio scaber	3	MY2079	L4	extract	H2O	12	22	34	-0.294118	yes
extract	Porcellio scaber	3	N2	L4	isoamylalc	DMSO	38	0	38	1	yes
extract	Porcellio scaber	3	N2	L4	octanol	DMSO	3	33	36	-0.833333	yes
extract	Porcellio scaber	3	N2	L4	extract	DMSO	9	12	21	-0.142857	yes
extract	Porcellio scaber	3	N2	L4	isoamylalc	EtOH	37	3	40	0.85	yes
extract	Porcellio scaber	3	N2	L4	octanol	EtOH	10	28	38	-0.473684	yes
extract	Porcellio scaber	3	N2	L4	extract	EtOH	20	21	41	-0.0243902	yes
extract	Porcellio scaber	3	N2	L4	isoamylalc	H2O	32	2	34	0.882353	yes
extract	Porcellio scaber	3	N2	L4	octanol	H2O	1	44	45	-0.955556	yes
extract	Porcellio scaber	3	N2	L4	extract	H2O	21	35	56	-0.25	yes
extract	Porcellio scaber	4	MY2079	L4	isoamylalc	DMSO	30	7	37	0.621622	yes
extract	Porcellio scaber	4	MY2079	L4	octanol	DMSO	9	53	62	-0.709677	yes
extract	Porcellio scaber	4	MY2079	L4	extract	DMSO	25	23	48	0.0416667	yes
extract	Porcellio scaber	4	MY2079	L4	isoamylalc	EtOH	56	13	69	0.623188	yes
extract	Porcellio scaber	4	MY2079	L4	octanol	EtOH	18	63	81	-0.555556	yes
extract	Porcellio scaber	4	MY2079	L4	extract	EtOH	18	31	49	-0.265306	yes
extract	Porcellio scaber	4	MY2079	L4	isoamylalc	H2O	42	7	49	0.714286	yes
extract	Porcellio scaber	4	MY2079	L4	octanol	H2O	16	55	71	-0.549296	yes
extract	Porcellio scaber	4	MY2079	L4	extract	H2O	28	39	67	-0.164179	yes
extract	Porcellio scaber	4	N2	L4	isoamylalc	DMSO	34	2	36	0.888889	yes
extract	Porcellio scaber	4	N2	L4	octanol	DMSO	3	25	28	-0.785714	yes
extract	Porcellio scaber	4	N2	L4	extract	DMSO	15	26	41	-0.268293	yes
extract	Porcellio scaber	4	N2	L4	isoamylalc	EtOH	46	6	52	0.769231	yes
extract	Porcellio scaber	4	N2	L4	octanol	EtOH	2	29	31	-0.870968	yes
extract	Porcellio scaber	4	N2	L4	extract	EtOH	12	24	36	-0.333333	yes
extract	Porcellio scaber	4	N2	L4	isoamylalc	H2O	46	9	55	0.672727	yes
extract	Porcellio scaber	4	N2	L4	octanol	H2O	1	23	24	-0.916667	yes
extract	Porcellio scaber	4	N2	L4	extract	H2O	19	12	31	0.225806	yes
extract	Porcellio scaber	5	MY2079	L4	isoamylalc	DMSO	61	6	67	0.820896	yes
extract	Porcellio scaber	5	MY2079	L4	octanol	DMSO	10	59	69	-0.710145	yes
extract	Porcellio scaber	5	MY2079	L4	extract	DMSO	13	43	56	-0.535714	yes
extract	Porcellio scaber	5	MY2079	L4	isoamylalc	EtOH	51	8	59	0.728814	yes
extract	Porcellio scaber	5	MY2079	L4	octanol	EtOH	3	84	87	-0.931034	yes
extract	Porcellio scaber	5	MY2079	L4	extract	EtOH	35	35	70	0	yes
extract	Porcellio scaber	5	MY2079	L4	isoamylalc	H2O	67	7	74	0.810811	yes
extract	Porcellio scaber	5	MY2079	L4	octanol	H2O	11	55	66	-0.666667	yes
extract	Porcellio scaber	5	MY2079	L4	extract	H2O	18	26	44	-0.181818	yes
extract	Porcellio scaber	5	N2	L4	isoamylalc	DMSO	54	0	54	1	yes
extract	Porcellio scaber	5	N2	L4	octanol	DMSO	2	70	72	-0.944444	yes
extract	Porcellio scaber	5	N2	L4	extract	DMSO	22	30	52	-0.153846	yes
extract	Porcellio scaber	5	N2	L4	isoamylalc	EtOH	52	3	55	0.890909	yes
extract	Porcellio scaber	5	N2	L4	octanol	EtOH	9	67	76	-0.763158	yes
extract	Porcellio scaber	5	N2	L4	extract	EtOH	18	47	65	-0.446154	yes
extract	Porcellio scaber	5	N2	L4	isoamylalc	H2O	43	3	46	0.869565	yes
extract	Porcellio scaber	5	N2	L4	octanol	H2O	4	51	55	-0.854545	yes
extract	Porcellio scaber	5	N2	L4	extract	H2O	28	26	54	0.037037	yes
extract	Porcellio scaber	6	MY2079	L4	isoamylalc	DMSO	40	7	47	0.702128	yes
extract	Porcellio scaber	6	MY2079	L4	octanol	DMSO	5	39	44	-0.772727	yes
extract	Porcellio scaber	6	MY2079	L4	extract	DMSO	24	28	52	-0.0769231	yes
extract	Porcellio scaber	6	MY2079	L4	isoamylalc	EtOH	41	2	43	0.906977	yes
extract	Porcellio scaber	6	MY2079	L4	octanol	EtOH	2	74	76	-0.947368	yes
extract	Porcellio scaber	6	MY2079	L4	extract	EtOH	21	20	41	0.0243902	yes
extract	Porcellio scaber	6	MY2079	L4	isoamylalc	H2O	34	10	44	0.545455	yes
extract	Porcellio scaber	6	MY2079	L4	octanol	H2O	0	33	33	-1	yes
extract	Porcellio scaber	6	MY2079	L4	extract	H2O	26	35	61	-0.147541	yes
extract	Porcellio scaber	6	N2	L4	isoamylalc	DMSO	44	2	46	0.913043	yes
extract	Porcellio scaber	6	N2	L4	octanol	DMSO	2	21	23	-0.826087	yes
extract	Porcellio scaber	6	N2	L4	extract	DMSO	13	18	31	-0.16129	yes
extract	Porcellio scaber	6	N2	L4	isoamylalc	EtOH	41	3	44	0.863636	yes
extract	Porcellio scaber	6	N2	L4	octanol	EtOH	3	17	20	-0.7	yes
extract	Porcellio scaber	6	N2	L4	extract	EtOH	12	17	29	-0.172414	yes
extract	Porcellio scaber	6	N2	L4	isoamylalc	H2O	36	2	38	0.894737	yes
extract	Porcellio scaber	6	N2	L4	octanol	H2O	4	23	27	-0.703704	yes
extract	Porcellio scaber	6	N2	L4	extract	H2O	5	13	18	-0.444444	yes
extract	Porcellio scaber	7	MY2079	L4	isoamylalc	DMSO	48	12	60	0.6	yes
extract	Porcellio scaber	7	MY2079	L4	octanol	DMSO	2	2	4	0	yes
extract	Porcellio scaber	7	MY2079	L4	extract	DMSO	20	16	36	0.111111	yes
extract	Porcellio scaber	7	MY2079	L4	isoamylalc	EtOH	43	10	53	0.622642	yes
extract	Porcellio scaber	7	MY2079	L4	octanol	EtOH	13	26	39	-0.333333	yes
extract	Porcellio scaber	7	MY2079	L4	extract	EtOH	35	28	63	0.111111	yes
extract	Porcellio scaber	7	MY2079	L4	isoamylalc	H2O	40	4	44	0.818182	yes
extract	Porcellio scaber	7	MY2079	L4	octanol	H2O	11	20	31	-0.290323	yes
extract	Porcellio scaber	7	MY2079	L4	extract	H2O	23	24	47	-0.0212766	yes
extract	Porcellio scaber	7	N2	L4	isoamylalc	DMSO	26	4	30	0.733333	yes
extract	Porcellio scaber	7	N2	L4	octanol	DMSO	7	42	49	-0.714286	yes
extract	Porcellio scaber	7	N2	L4	extract	DMSO	17	19	36	-0.0555556	yes
extract	Porcellio scaber	7	N2	L4	isoamylalc	EtOH	45	3	48	0.875	yes
extract	Porcellio scaber	7	N2	L4	octanol	EtOH	5	18	23	-0.565217	yes
extract	Porcellio scaber	7	N2	L4	extract	EtOH	20	18	38	0.0526316	yes
extract	Porcellio scaber	7	N2	L4	isoamylalc	H2O	42	0	42	1	yes
extract	Porcellio scaber	7	N2	L4	octanol	H2O	7	26	33	-0.575758	yes
extract	Porcellio scaber	7	N2	L4	extract	H2O	17	19	36	-0.0555556	yes
extract	Porcellio scaber	8	MY2079	L4	isoamylalc	DMSO	37	7	44	0.681818	yes
extract	Porcellio scaber	8	MY2079	L4	octanol	DMSO	3	59	62	-0.903226	yes
extract	Porcellio scaber	8	MY2079	L4	extract	DMSO	39	41	80	-0.025	yes
extract	Porcellio scaber	8	MY2079	L4	isoamylalc	EtOH	44	6	50	0.76	yes
extract	Porcellio scaber	8	MY2079	L4	octanol	EtOH	2	52	54	-0.925926	yes
extract	Porcellio scaber	8	MY2079	L4	extract	EtOH	42	31	73	0.150685	yes
extract	Porcellio scaber	8	MY2079	L4	isoamylalc	H2O	53	8	61	0.737705	yes
extract	Porcellio scaber	8	MY2079	L4	octanol	H2O	4	77	81	-0.901235	yes
extract	Porcellio scaber	8	MY2079	L4	extract	H2O	33	37	70	-0.0571429	yes
extract	Porcellio scaber	8	N2	L4	isoamylalc	DMSO	37	4	41	0.804878	yes
extract	Porcellio scaber	8	N2	L4	octanol	DMSO	9	35	44	-0.590909	yes
extract	Porcellio scaber	8	N2	L4	extract	DMSO	36	42	78	-0.0769231	yes
extract	Porcellio scaber	8	N2	L4	isoamylalc	EtOH	48	5	53	0.811321	yes
extract	Porcellio scaber	8	N2	L4	octanol	EtOH	3	38	41	-0.853659	yes
extract	Porcellio scaber	8	N2	L4	extract	EtOH	42	22	64	0.3125	yes
extract	Porcellio scaber	8	N2	L4	isoamylalc	H2O	74	0	74	1	yes
extract	Porcellio scaber	8	N2	L4	octanol	H2O	5	56	61	-0.836066	yes
extract	Porcellio scaber	8	N2	L4	extract	H2O	9	29	38	-0.526316	yes
extract	Porcellio scaber	9	MY2079	L4	isoamylalc	DMSO	46	28	74	0.243243	yes
extract	Porcellio scaber	9	MY2079	L4	octanol	DMSO	2	70	72	-0.944444	yes
extract	Porcellio scaber	9	MY2079	L4	extract	DMSO	26	48	74	-0.297297	yes
extract	Porcellio scaber	9	MY2079	L4	isoamylalc	EtOH	63	47	110	0.145455	yes
extract	Porcellio scaber	9	MY2079	L4	octanol	EtOH	7	72	79	-0.822785	yes
extract	Porcellio scaber	9	MY2079	L4	extract	EtOH	30	25	55	0.0909091	yes
extract	Porcellio scaber	9	MY2079	L4	isoamylalc	H2O	49	22	71	0.380282	yes
extract	Porcellio scaber	9	MY2079	L4	octanol	H2O	4	54	58	-0.862069	yes
extract	Porcellio scaber	9	MY2079	L4	extract	H2O	23	30	53	-0.132075	yes
extract	Porcellio scaber	9	N2	L4	isoamylalc	DMSO	84	19	103	0.631068	yes
extract	Porcellio scaber	9	N2	L4	octanol	DMSO	3	72	75	-0.92	yes
extract	Porcellio scaber	9	N2	L4	extract	DMSO	23	43	66	-0.30303	yes
extract	Porcellio scaber	9	N2	L4	isoamylalc	EtOH	53	11	64	0.65625	yes
extract	Porcellio scaber	9	N2	L4	octanol	EtOH	9	68	77	-0.766234	yes
extract	Porcellio scaber	9	N2	L4	extract	EtOH	29	47	76	-0.236842	yes
extract	Porcellio scaber	9	N2	L4	isoamylalc	H2O	43	7	50	0.72	yes
extract	Porcellio scaber	9	N2	L4	octanol	H2O	10	83	93	-0.784946	yes
extract	Porcellio scaber	9	N2	L4	extract	H2O	26	36	62	-0.16129	yes
extract	Porcellio scaber	10	MY2079	L4	isoamylalc	DMSO	79	16	95	0.663158	yes
extract	Porcellio scaber	10	MY2079	L4	octanol	DMSO	7	74	81	-0.82716	yes
extract	Porcellio scaber	10	MY2079	L4	extract	DMSO	28	40	68	-0.176471	yes
extract	Porcellio scaber	10	MY2079	L4	isoamylalc	EtOH	51	24	75	0.36	yes
extract	Porcellio scaber	10	MY2079	L4	octanol	EtOH	12	61	73	-0.671233	yes
extract	Porcellio scaber	10	MY2079	L4	extract	EtOH	24	16	40	0.2	yes
extract	Porcellio scaber	10	MY2079	L4	isoamylalc	H2O	71	15	86	0.651163	yes
extract	Porcellio scaber	10	MY2079	L4	octanol	H2O	8	78	86	-0.813953	yes
extract	Porcellio scaber	10	MY2079	L4	extract	H2O	31	24	55	0.127273	yes
extract	Porcellio scaber	10	N2	L4	isoamylalc	DMSO	28	7	35	0.6	yes
extract	Porcellio scaber	10	N2	L4	octanol	DMSO	2	18	20	-0.8	yes
extract	Porcellio scaber	10	N2	L4	extract	DMSO	11	19	30	-0.266667	yes
extract	Porcellio scaber	10	N2	L4	isoamylalc	EtOH	25	2	27	0.851852	yes
extract	Porcellio scaber	10	N2	L4	octanol	EtOH	7	28	35	-0.6	yes
extract	Porcellio scaber	10	N2	L4	extract	EtOH	0	0	0	NA	no	threshold not reached, exclude
extract	Porcellio scaber	10	N2	L4	isoamylalc	H2O	36	0	36	1	yes
extract	Porcellio scaber	10	N2	L4	octanol	H2O	2	29	31	-0.870968	yes
extract	Porcellio scaber	10	N2	L4	extract	H2O	4	4	8	NA	no	threshold not reached, exclude

## Sheet: 2C P. scaber extract dauer
assay	invertebrate_species	rep	worm_strain	stage	choice_treat	solvent	count_treat	count_solvent	total	index	include	comments
extract	Porcellio scaber	1	MY2079	dauer	octanol	EtOH	17	21	38	-0.105263	yes
extract	Porcellio scaber	1	MY2079	dauer	tissue	EtOH	16	24	40	-0.2	yes
extract	Porcellio scaber	1	MY2079	dauer	octanol	DMSO	17	29	46	-0.26087	yes
extract	Porcellio scaber	1	MY2079	dauer	octanol	H2O	25	26	51	-0.0196078	yes
extract	Porcellio scaber	1	MY2079	dauer	tissue	H2O	30	22	52	0.153846	yes
extract	Porcellio scaber	1	MY2079	dauer	isoamylalc	DMSO	43	11	54	0.592593	yes
extract	Porcellio scaber	1	MY2079	dauer	tissue	DMSO	30	26	56	0.0714286	yes
extract	Porcellio scaber	1	MY2079	dauer	isoamylalc	EtOH	43	17	60	0.433333	yes
extract	Porcellio scaber	1	MY2079	dauer	isoamylalc	H2O	41	23	64	0.28125	yes
extract	Porcellio scaber	1	N2	dauer	isoamylalc	EtOH	9	2	11	0.636364	yes
extract	Porcellio scaber	1	N2	dauer	tissue	DMSO	6	6	12	0	yes
extract	Porcellio scaber	1	N2	dauer	isoamylalc	DMSO	12	2	14	0.714286	yes
extract	Porcellio scaber	1	N2	dauer	octanol	H2O	5	13	18	-0.444444	yes
extract	Porcellio scaber	1	N2	dauer	tissue	EtOH	8	11	19	-0.157895	yes
extract	Porcellio scaber	1	N2	dauer	tissue	H2O	8	12	20	-0.2	yes
extract	Porcellio scaber	1	N2	dauer	octanol	DMSO	8	13	21	-0.238095	yes
extract	Porcellio scaber	1	N2	dauer	octanol	EtOH	10	11	21	-0.047619	yes
extract	Porcellio scaber	1	N2	dauer	isoamylalc	H2O	22	6	28	0.571429	yes
extract	Porcellio scaber	2	MY2079	dauer	tissue	H2O	21	20	41	0.0243902	yes
extract	Porcellio scaber	2	MY2079	dauer	tissue	EtOH	25	26	51	-0.0196078	yes
extract	Porcellio scaber	2	MY2079	dauer	tissue	DMSO	23	34	57	-0.192982	yes
extract	Porcellio scaber	2	MY2079	dauer	isoamylalc	EtOH	47	11	58	0.62069	yes
extract	Porcellio scaber	2	MY2079	dauer	isoamylalc	DMSO	54	14	68	0.588235	yes
extract	Porcellio scaber	2	MY2079	dauer	isoamylalc	H2O	59	18	77	0.532468	yes
extract	Porcellio scaber	2	MY2079	dauer	octanol	H2O	38	41	79	-0.0379747	yes
extract	Porcellio scaber	2	MY2079	dauer	octanol	DMSO	29	51	80	-0.275	yes
extract	Porcellio scaber	2	MY2079	dauer	octanol	EtOH	17	70	87	-0.609195	yes
extract	Porcellio scaber	2	N2	dauer	octanol	H2O	2	7	9	NA	no	threshold not reached, exclude
extract	Porcellio scaber	2	N2	dauer	isoamylalc	DMSO	8	6	14	0.142857	yes
extract	Porcellio scaber	2	N2	dauer	octanol	DMSO	6	10	16	-0.25	yes
extract	Porcellio scaber	2	N2	dauer	tissue	DMSO	8	9	17	-0.0588235	yes
extract	Porcellio scaber	2	N2	dauer	isoamylalc	H2O	10	8	18	0.111111	yes
extract	Porcellio scaber	2	N2	dauer	octanol	EtOH	1	18	19	-0.894737	yes
extract	Porcellio scaber	2	N2	dauer	tissue	H2O	8	12	20	-0.2	yes
extract	Porcellio scaber	2	N2	dauer	tissue	EtOH	11	11	22	0	yes
extract	Porcellio scaber	2	N2	dauer	isoamylalc	EtOH	14	11	25	0.12	yes
extract	Porcellio scaber	4	MY2079	dauer	octanol	H2O	23	29	52	-0.115385	yes
extract	Porcellio scaber	4	MY2079	dauer	tissue	H2O	31	28	59	0.0508475	yes
extract	Porcellio scaber	4	MY2079	dauer	isoamylalc	H2O	51	13	64	0.59375	yes
extract	Porcellio scaber	4	MY2079	dauer	tissue	DMSO	29	35	64	-0.09375	yes
extract	Porcellio scaber	4	MY2079	dauer	isoamylalc	DMSO	64	4	68	0.882353	yes
extract	Porcellio scaber	4	MY2079	dauer	tissue	EtOH	39	29	68	0.147059	yes
extract	Porcellio scaber	4	MY2079	dauer	octanol	EtOH	27	42	69	-0.217391	yes
extract	Porcellio scaber	4	MY2079	dauer	isoamylalc	EtOH	64	18	82	0.560976	yes
extract	Porcellio scaber	4	MY2079	dauer	octanol	DMSO	39	65	104	-0.25	yes
extract	Porcellio scaber	4	N2	dauer	octanol	H2O	1	0	1	NA	no	threshold not reached, exclude
extract	Porcellio scaber	4	N2	dauer	isoamylalc	EtOH	2	1	3	NA	no	threshold not reached, exclude
extract	Porcellio scaber	4	N2	dauer	octanol	DMSO	0	3	3	NA	no	threshold not reached, exclude
extract	Porcellio scaber	4	N2	dauer	octanol	EtOH	1	3	4	NA	no	threshold not reached, exclude
extract	Porcellio scaber	4	N2	dauer	tissue	EtOH	3	1	4	NA	no	threshold not reached, exclude
extract	Porcellio scaber	4	N2	dauer	isoamylalc	DMSO	6	2	8	NA	no	threshold not reached, exclude
extract	Porcellio scaber	4	N2	dauer	isoamylalc	H2O	7	2	9	NA	no	threshold not reached, exclude
extract	Porcellio scaber	4	N2	dauer	tissue	H2O	5	4	9	NA	no	threshold not reached, exclude
extract	Porcellio scaber	4	N2	dauer	tissue	DMSO	4	8	12	-0.333333	yes
extract	Porcellio scaber	5	MY2079	dauer	tissue	DMSO	15	12	27	0.111111	yes
extract	Porcellio scaber	5	MY2079	dauer	octanol	DMSO	20	21	41	-0.0243902	yes
extract	Porcellio scaber	5	MY2079	dauer	isoamylalc	DMSO	38	8	46	0.652174	yes
extract	Porcellio scaber	5	MY2079	dauer	isoamylalc	H2O	45	6	51	0.764706	yes
extract	Porcellio scaber	5	MY2079	dauer	tissue	EtOH	27	31	58	-0.0689655	yes
extract	Porcellio scaber	5	MY2079	dauer	octanol	EtOH	24	36	60	-0.2	yes
extract	Porcellio scaber	5	MY2079	dauer	tissue	H2O	32	30	62	0.0322581	yes
extract	Porcellio scaber	5	MY2079	dauer	isoamylalc	EtOH	56	8	64	0.75	yes
extract	Porcellio scaber	5	MY2079	dauer	octanol	H2O	31	41	72	-0.138889	yes
extract	Porcellio scaber	5	N2	dauer	isoamylalc	EtOH	7	6	13	0.0769231	yes
extract	Porcellio scaber	5	N2	dauer	octanol	EtOH	5	9	14	-0.285714	yes
extract	Porcellio scaber	5	N2	dauer	isoamylalc	H2O	15	7	22	0.363636	yes
extract	Porcellio scaber	5	N2	dauer	octanol	DMSO	16	16	32	0	yes
extract	Porcellio scaber	5	N2	dauer	octanol	H2O	12	20	32	-0.25	yes
extract	Porcellio scaber	5	N2	dauer	tissue	EtOH	21	12	33	0.272727	yes
extract	Porcellio scaber	5	N2	dauer	isoamylalc	DMSO	23	11	34	0.352941	yes
extract	Porcellio scaber	5	N2	dauer	tissue	DMSO	19	17	36	0.0555556	yes
extract	Porcellio scaber	5	N2	dauer	tissue	H2O	20	17	37	0.0810811	yes
extract	Porcellio scaber	6	MY2079	dauer	isoamylalc	H2O	143	26	169	0.692308	yes
extract	Porcellio scaber	6	MY2079	dauer	tissue	EtOH	83	95	178	-0.0674157	yes
extract	Porcellio scaber	6	MY2079	dauer	octanol	EtOH	102	98	200	0.02	yes
extract	Porcellio scaber	6	MY2079	dauer	tissue	H2O	119	103	222	0.0720721	yes
extract	Porcellio scaber	6	MY2079	dauer	tissue	DMSO	122	121	243	0.00411523	yes
extract	Porcellio scaber	6	MY2079	dauer	isoamylalc	EtOH	260	45	305	0.704918	yes
extract	Porcellio scaber	6	MY2079	dauer	octanol	DMSO	121	187	308	-0.214286	yes
extract	Porcellio scaber	6	MY2079	dauer	octanol	H2O	164	167	331	-0.00906344	yes
extract	Porcellio scaber	6	MY2079	dauer	isoamylalc	DMSO	299	62	361	0.65651	yes
extract	Porcellio scaber	6	N2	dauer	octanol	EtOH	12	10	22	0.0909091	yes
extract	Porcellio scaber	6	N2	dauer	isoamylalc	EtOH	19	8	27	0.407407	yes
extract	Porcellio scaber	6	N2	dauer	octanol	DMSO	15	14	29	0.0344828	yes
extract	Porcellio scaber	6	N2	dauer	isoamylalc	H2O	24	10	34	0.411765	yes
extract	Porcellio scaber	6	N2	dauer	octanol	H2O	13	21	34	-0.235294	yes
extract	Porcellio scaber	6	N2	dauer	tissue	H2O	23	12	35	0.314286	yes
extract	Porcellio scaber	6	N2	dauer	tissue	DMSO	18	18	36	0	yes
extract	Porcellio scaber	6	N2	dauer	tissue	EtOH	20	22	42	-0.047619	yes
extract	Porcellio scaber	6	N2	dauer	isoamylalc	DMSO	25	32	57	-0.122807	yes
extract	Porcellio scaber	7	MY2079	dauer	octanol	H2O	29	46	75	-0.226667	yes
extract	Porcellio scaber	7	MY2079	dauer	tissue	DMSO	37	56	93	-0.204301	yes
extract	Porcellio scaber	7	MY2079	dauer	octanol	EtOH	35	59	94	-0.255319	yes
extract	Porcellio scaber	7	MY2079	dauer	octanol	DMSO	19	83	102	-0.627451	yes
extract	Porcellio scaber	7	MY2079	dauer	tissue	H2O	44	61	105	-0.161905	yes
extract	Porcellio scaber	7	MY2079	dauer	tissue	EtOH	74	57	131	0.129771	yes
extract	Porcellio scaber	7	MY2079	dauer	isoamylalc	H2O	84	57	141	0.191489	yes
extract	Porcellio scaber	7	MY2079	dauer	isoamylalc	DMSO	80	67	147	0.0884354	yes
extract	Porcellio scaber	7	MY2079	dauer	isoamylalc	EtOH	119	94	213	0.117371	yes
extract	Porcellio scaber	7	N2	dauer	isoamylalc	H2O	7	3	10	0.4	yes
extract	Porcellio scaber	7	N2	dauer	tissue	H2O	8	6	14	0.142857	yes
extract	Porcellio scaber	7	N2	dauer	tissue	DMSO	6	9	15	-0.2	yes
extract	Porcellio scaber	7	N2	dauer	isoamylalc	EtOH	13	7	20	0.3	yes
extract	Porcellio scaber	7	N2	dauer	octanol	H2O	9	12	21	-0.142857	yes
extract	Porcellio scaber	7	N2	dauer	isoamylalc	DMSO	14	10	24	0.166667	yes
extract	Porcellio scaber	7	N2	dauer	octanol	EtOH	14	10	24	0.166667	yes
extract	Porcellio scaber	7	N2	dauer	tissue	EtOH	9	18	27	-0.333333	yes
extract	Porcellio scaber	7	N2	dauer	octanol	DMSO	18	12	30	0.2	yes
extract	Porcellio scaber	8	MY2079	dauer	octanol	H2O	40	57	97	-0.175258	yes
extract	Porcellio scaber	8	MY2079	dauer	tissue	DMSO	63	64	127	-0.00787402	yes
extract	Porcellio scaber	8	MY2079	dauer	isoamylalc	EtOH	66	62	128	0.03125	yes
extract	Porcellio scaber	8	MY2079	dauer	tissue	EtOH	62	86	148	-0.162162	yes
extract	Porcellio scaber	8	MY2079	dauer	octanol	EtOH	72	91	163	-0.116564	yes
extract	Porcellio scaber	8	MY2079	dauer	isoamylalc	DMSO	97	87	184	0.0543478	yes
extract	Porcellio scaber	8	MY2079	dauer	octanol	DMSO	77	108	185	-0.167568	yes
extract	Porcellio scaber	8	MY2079	dauer	tissue	H2O	113	105	218	0.0366972	yes
extract	Porcellio scaber	8	MY2079	dauer	isoamylalc	H2O	146	91	237	0.232068	yes
extract	Porcellio scaber	8	N2	dauer	tissue	H2O	3	5	8	NA	no	threshold not reached, exclude
extract	Porcellio scaber	8	N2	dauer	octanol	EtOH	6	6	12	0	yes
extract	Porcellio scaber	8	N2	dauer	tissue	EtOH	3	9	12	-0.5	yes
extract	Porcellio scaber	8	N2	dauer	isoamylalc	H2O	14	1	15	0.866667	yes
extract	Porcellio scaber	8	N2	dauer	tissue	DMSO	10	5	15	0.333333	yes
extract	Porcellio scaber	8	N2	dauer	isoamylalc	EtOH	11	5	16	0.375	yes
extract	Porcellio scaber	8	N2	dauer	octanol	DMSO	11	10	21	0.047619	yes
extract	Porcellio scaber	8	N2	dauer	isoamylalc	DMSO	12	10	22	0.0909091	yes
extract	Porcellio scaber	8	N2	dauer	octanol	H2O	11	13	24	-0.0833333	yes
extract	Porcellio scaber	9	MY2079	dauer	tissue	DMSO	68	54	122	0.114754	yes
extract	Porcellio scaber	9	MY2079	dauer	isoamylalc	DMSO	112	35	147	0.52381	yes
extract	Porcellio scaber	9	MY2079	dauer	octanol	EtOH	70	77	147	-0.047619	yes
extract	Porcellio scaber	9	MY2079	dauer	octanol	H2O	76	74	150	0.0133333	yes
extract	Porcellio scaber	9	MY2079	dauer	tissue	EtOH	73	82	155	-0.0580645	yes
extract	Porcellio scaber	9	MY2079	dauer	isoamylalc	H2O	119	45	164	0.45122	yes
extract	Porcellio scaber	9	MY2079	dauer	tissue	H2O	81	87	168	-0.0357143	yes
extract	Porcellio scaber	9	MY2079	dauer	octanol	DMSO	100	84	184	0.0869565	yes
extract	Porcellio scaber	9	MY2079	dauer	isoamylalc	EtOH	140	90	230	0.217391	yes
extract	Porcellio scaber	9	N2	dauer	isoamylalc	DMSO	5	6	11	-0.0909091	yes
extract	Porcellio scaber	9	N2	dauer	isoamylalc	EtOH	10	7	17	0.176471	yes
extract	Porcellio scaber	9	N2	dauer	tissue	EtOH	9	9	18	0	yes
extract	Porcellio scaber	9	N2	dauer	octanol	DMSO	12	8	20	0.2	yes
extract	Porcellio scaber	9	N2	dauer	tissue	H2O	14	13	27	0.037037	yes
extract	Porcellio scaber	9	N2	dauer	isoamylalc	H2O	22	13	35	0.257143	yes
extract	Porcellio scaber	9	N2	dauer	octanol	EtOH	19	29	48	-0.208333	yes
extract	Porcellio scaber	9	N2	dauer	octanol	H2O	19	30	49	-0.22449	yes
extract	Porcellio scaber	9	N2	dauer	tissue	DMSO	32	19	51	0.254902	yes
extract	Porcellio scaber	11	MY2079	dauer	octanol	DMSO	23	23	46	0	yes
extract	Porcellio scaber	11	MY2079	dauer	octanol	H2O	27	37	64	-0.15625	yes
extract	Porcellio scaber	11	MY2079	dauer	isoamylalc	H2O	37	29	66	0.121212	yes
extract	Porcellio scaber	11	MY2079	dauer	tissue	H2O	39	32	71	0.0985915	yes
extract	Porcellio scaber	11	MY2079	dauer	isoamylalc	EtOH	34	39	73	-0.0684932	yes
extract	Porcellio scaber	11	MY2079	dauer	isoamylalc	DMSO	51	38	89	0.146067	yes
extract	Porcellio scaber	11	MY2079	dauer	octanol	EtOH	36	55	91	-0.208791	yes
extract	Porcellio scaber	11	MY2079	dauer	tissue	DMSO	60	53	113	0.0619469	yes
extract	Porcellio scaber	11	MY2079	dauer	tissue	EtOH	51	62	113	-0.0973451	yes
extract	Porcellio scaber	11	N2	dauer	isoamylalc	EtOH	6	4	10	0.2	yes
extract	Porcellio scaber	11	N2	dauer	isoamylalc	DMSO	11	0	11	1	yes
extract	Porcellio scaber	11	N2	dauer	octanol	DMSO	9	5	14	0.285714	yes
extract	Porcellio scaber	11	N2	dauer	isoamylalc	H2O	11	5	16	0.375	yes
extract	Porcellio scaber	11	N2	dauer	tissue	H2O	10	6	16	0.25	yes
extract	Porcellio scaber	11	N2	dauer	octanol	H2O	5	12	17	-0.411765	yes
extract	Porcellio scaber	11	N2	dauer	tissue	EtOH	11	10	21	0.047619	yes
extract	Porcellio scaber	11	N2	dauer	tissue	DMSO	14	9	23	0.217391	yes
extract	Porcellio scaber	11	N2	dauer	octanol	EtOH	21	20	41	0.0243902	yes
extract	Porcellio scaber	12	MY2079	dauer	octanol	DMSO	28	73	101	-0.445545	yes
extract	Porcellio scaber	12	MY2079	dauer	tissue	H2O	51	66	117	-0.128205	yes
extract	Porcellio scaber	12	MY2079	dauer	tissue	DMSO	62	72	134	-0.0746269	yes
extract	Porcellio scaber	12	MY2079	dauer	octanol	EtOH	38	118	156	-0.512821	yes
extract	Porcellio scaber	12	MY2079	dauer	octanol	H2O	49	107	156	-0.371795	yes
extract	Porcellio scaber	12	MY2079	dauer	isoamylalc	H2O	135	21	156	0.730769	yes
extract	Porcellio scaber	12	MY2079	dauer	tissue	EtOH	88	114	202	-0.128713	yes
extract	Porcellio scaber	12	MY2079	dauer	isoamylalc	EtOH	194	50	244	0.590164	yes
extract	Porcellio scaber	12	MY2079	dauer	isoamylalc	DMSO	211	55	266	0.586466	yes
extract	Porcellio scaber	12	N2	dauer	isoamylalc	EtOH	7	10	17	-0.176471	yes
extract	Porcellio scaber	12	N2	dauer	tissue	DMSO	8	15	23	-0.304348	yes
extract	Porcellio scaber	12	N2	dauer	isoamylalc	DMSO	16	12	28	0.142857	yes
extract	Porcellio scaber	12	N2	dauer	tissue	EtOH	7	22	29	-0.517241	yes
extract	Porcellio scaber	12	N2	dauer	tissue	H2O	14	15	29	-0.0344828	yes
extract	Porcellio scaber	12	N2	dauer	isoamylalc	H2O	23	7	30	0.533333	yes
extract	Porcellio scaber	12	N2	dauer	octanol	H2O	11	28	39	-0.435897	yes
extract	Porcellio scaber	12	N2	dauer	octanol	DMSO	33	33	66	0	yes
extract	Porcellio scaber	12	N2	dauer	octanol	EtOH	40	49	89	-0.101124	yes
extract	Porcellio scaber	13	N2	dauer	tissue	H2O	6	14	20	-0.4	yes
extract	Porcellio scaber	13	N2	dauer	isoamylalc	H2O	13	10	23	0.130435	yes
extract	Porcellio scaber	13	N2	dauer	octanol	H2O	16	11	27	0.185185	yes
extract	Porcellio scaber	13	N2	dauer	tissue	DMSO	16	9	25	0.28	yes
extract	Porcellio scaber	13	N2	dauer	isoamylalc	DMSO	9	2	11	0.636364	yes
extract	Porcellio scaber	13	N2	dauer	octanol	DMSO	27	26	53	0.0188679	yes
extract	Porcellio scaber	13	N2	dauer	tissue	EtOH	11	7	18	0.222222	yes
extract	Porcellio scaber	13	N2	dauer	isoamylalc	EtOH	8	3	11	0.454545	yes
extract	Porcellio scaber	13	N2	dauer	octanol	EtOH	16	23	39	-0.179487	yes
extract	Porcellio scaber	14	N2	dauer	tissue	H2O	7	14	21	-0.333333	yes
extract	Porcellio scaber	14	N2	dauer	isoamylalc	H2O	10	2	12	0.666667	yes
extract	Porcellio scaber	14	N2	dauer	octanol	H2O	10	8	18	0.111111	yes
extract	Porcellio scaber	14	N2	dauer	tissue	DMSO	12	16	28	-0.142857	yes
extract	Porcellio scaber	14	N2	dauer	isoamylalc	DMSO	14	6	20	0.4	yes
extract	Porcellio scaber	14	N2	dauer	octanol	DMSO	8	10	18	-0.111111	yes
extract	Porcellio scaber	14	N2	dauer	tissue	EtOH	7	8	15	-0.0666667	yes
extract	Porcellio scaber	14	N2	dauer	isoamylalc	EtOH	15	5	20	0.5	yes
extract	Porcellio scaber	14	N2	dauer	octanol	EtOH	11	11	22	0	yes

## Sheet: 2D Armadillidium extract L4
assay	invertebrate_species	rep	worm_strain	stage	choice_treat	solvent	count_treat	count_solvent	total	index	include	comments
extract	Armadillidium sp.	1	MY2079	L4	extract	DMSO	22	11	33	0.333333	yes
extract	Armadillidium sp.	1	MY2079	L4	extract	H2O	18	13	31	0.16129	yes
extract	Armadillidium sp.	1	MY2079	L4	extract	EtOH	10	8	18	0.111111	yes
extract	Armadillidium sp.	1	MY2079	L4	isoamylalc	DMSO	39	18	57	0.368421	yes
extract	Armadillidium sp.	1	MY2079	L4	isoamylalc	H2O	34	10	44	0.545455	yes
extract	Armadillidium sp.	1	MY2079	L4	isoamylalc	EtOH	25	9	34	0.470588	yes
extract	Armadillidium sp.	1	MY2079	L4	octanol	DMSO	5	12	17	-0.411765	yes
extract	Armadillidium sp.	1	MY2079	L4	octanol	H2O	5	27	32	-0.6875	yes
extract	Armadillidium sp.	1	MY2079	L4	octanol	EtOH	9	46	55	-0.672727	yes
extract	Armadillidium sp.	1	N2	L4	extract	DMSO	10	6	16	0.25	yes
extract	Armadillidium sp.	1	N2	L4	extract	H2O	6	9	15	-0.2	yes
extract	Armadillidium sp.	1	N2	L4	extract	EtOH	7	13	20	-0.3	yes
extract	Armadillidium sp.	1	N2	L4	isoamylalc	DMSO	8	0	8	NA	no	threshold not reached, exclude
extract	Armadillidium sp.	1	N2	L4	isoamylalc	H2O	15	3	18	0.666667	yes
extract	Armadillidium sp.	1	N2	L4	isoamylalc	EtOH	17	1	18	0.888889	yes
extract	Armadillidium sp.	1	N2	L4	octanol	DMSO	0	9	9	NA	no	threshold not reached, exclude
extract	Armadillidium sp.	1	N2	L4	octanol	H2O	3	6	9	NA	no	threshold not reached, exclude
extract	Armadillidium sp.	1	N2	L4	octanol	EtOH	2	12	14	-0.714286	yes
extract	Armadillidium sp.	2	MY2079	L4	extract	DMSO	11	18	29	-0.241379	yes
extract	Armadillidium sp.	2	MY2079	L4	extract	H2O	8	22	30	-0.466667	yes
extract	Armadillidium sp.	2	MY2079	L4	extract	EtOH	9	19	28	-0.357143	yes
extract	Armadillidium sp.	2	MY2079	L4	isoamylalc	DMSO	31	9	40	0.55	yes
extract	Armadillidium sp.	2	MY2079	L4	isoamylalc	H2O	25	5	30	0.666667	yes
extract	Armadillidium sp.	2	MY2079	L4	isoamylalc	EtOH	25	12	37	0.351351	yes
extract	Armadillidium sp.	2	MY2079	L4	octanol	DMSO	0	13	13	-1	yes
extract	Armadillidium sp.	2	MY2079	L4	octanol	H2O	7	28	35	-0.6	yes
extract	Armadillidium sp.	2	MY2079	L4	octanol	EtOH	7	26	33	-0.575758	yes
extract	Armadillidium sp.	2	N2	L4	extract	DMSO	4	8	12	NA	no	most worms stayed in the middle, exclude
extract	Armadillidium sp.	2	N2	L4	extract	H2O	14	9	23	NA	no	most worms stayed in the middle, exclude
extract	Armadillidium sp.	2	N2	L4	extract	EtOH	17	14	31	NA	no	most worms stayed in the middle, exclude
extract	Armadillidium sp.	2	N2	L4	isoamylalc	DMSO	7	7	14	NA	no	most worms stayed in the middle, exclude
extract	Armadillidium sp.	2	N2	L4	isoamylalc	H2O	16	5	21	NA	no	most worms stayed in the middle, exclude
extract	Armadillidium sp.	2	N2	L4	isoamylalc	EtOH	17	4	21	NA	no	most worms stayed in the middle, exclude
extract	Armadillidium sp.	2	N2	L4	octanol	DMSO	0	10	10	NA	no	most worms stayed in the middle, exclude
extract	Armadillidium sp.	2	N2	L4	octanol	H2O	2	1	3	NA	no	most worms stayed in the middle, exclude
extract	Armadillidium sp.	2	N2	L4	octanol	EtOH	3	6	9	NA	no	most worms stayed in the middle, exclude
extract	Armadillidium sp.	3	MY2079	L4	extract	EtOH	27	33	60	-0.1	yes
extract	Armadillidium sp.	3	MY2079	L4	extract	DMSO	29	44	73	-0.205479	yes
extract	Armadillidium sp.	3	MY2079	L4	extract	H2O	18	39	57	-0.368421	yes
extract	Armadillidium sp.	3	MY2079	L4	isoamylalc	EtOH	43	14	57	0.508772	yes
extract	Armadillidium sp.	3	MY2079	L4	isoamylalc	H2O	46	3	49	0.877551	yes
extract	Armadillidium sp.	3	MY2079	L4	isoamylalc	DMSO	42	9	51	0.647059	yes
extract	Armadillidium sp.	3	MY2079	L4	octanol	EtOH	5	43	48	-0.791667	yes
extract	Armadillidium sp.	3	MY2079	L4	octanol	H2O	3	40	43	-0.860465	yes
extract	Armadillidium sp.	3	MY2079	L4	octanol	DMSO	1	42	43	-0.953488	yes
extract	Armadillidium sp.	3	N2	L4	extract	EtOH	32	38	70	-0.0857143	yes
extract	Armadillidium sp.	3	N2	L4	extract	DMSO	12	26	38	-0.368421	yes
extract	Armadillidium sp.	3	N2	L4	extract	H2O	15	26	41	-0.268293	yes
extract	Armadillidium sp.	3	N2	L4	isoamylalc	EtOH	54	4	58	0.862069	yes
extract	Armadillidium sp.	3	N2	L4	isoamylalc	DMSO	48	3	51	0.882353	yes
extract	Armadillidium sp.	3	N2	L4	isoamylalc	H2O	43	3	46	0.869565	yes
extract	Armadillidium sp.	3	N2	L4	octanol	EtOH	5	51	56	-0.821429	yes
extract	Armadillidium sp.	3	N2	L4	octanol	DMSO	6	61	67	-0.820896	yes
extract	Armadillidium sp.	3	N2	L4	octanol	H2O	5	54	59	-0.830508	yes
extract	Armadillidium sp.	4	MY2079	L4	extract	H2O	19	31	50	-0.24	yes
extract	Armadillidium sp.	4	MY2079	L4	extract	EtOH	12	34	46	-0.478261	yes
extract	Armadillidium sp.	4	MY2079	L4	extract	DMSO	16	40	56	-0.428571	yes
extract	Armadillidium sp.	4	MY2079	L4	isoamylalc	H2O	73	8	81	0.802469	yes
extract	Armadillidium sp.	4	MY2079	L4	isoamylalc	EtOH	44	4	48	0.833333	yes
extract	Armadillidium sp.	4	MY2079	L4	isoamylalc	DMSO	28	7	35	0.6	yes
extract	Armadillidium sp.	4	MY2079	L4	octanol	H2O	9	48	57	-0.684211	yes
extract	Armadillidium sp.	4	MY2079	L4	octanol	EtOH	10	43	53	-0.622642	yes
extract	Armadillidium sp.	4	MY2079	L4	octanol	DMSO	3	38	41	-0.853659	yes
extract	Armadillidium sp.	4	N2	L4	extract	H2O	7	28	35	-0.6	yes
extract	Armadillidium sp.	4	N2	L4	extract	EtOH	13	21	34	-0.235294	yes
extract	Armadillidium sp.	4	N2	L4	extract	DMSO	21	42	63	-0.333333	yes
extract	Armadillidium sp.	4	N2	L4	isoamylalc	H2O	76	3	79	0.924051	yes
extract	Armadillidium sp.	4	N2	L4	isoamylalc	EtOH	43	1	44	0.954545	yes
extract	Armadillidium sp.	4	N2	L4	isoamylalc	DMSO	36	2	38	0.894737	yes
extract	Armadillidium sp.	4	N2	L4	octanol	H2O	6	24	30	-0.6	yes
extract	Armadillidium sp.	4	N2	L4	octanol	EtOH	9	30	39	-0.538462	yes
extract	Armadillidium sp.	4	N2	L4	octanol	DMSO	7	61	68	-0.794118	yes
extract	Armadillidium sp.	5	MY2079	L4	extract	H2O	15	19	34	-0.117647	yes
extract	Armadillidium sp.	5	MY2079	L4	extract	EtOH	17	36	53	-0.358491	yes
extract	Armadillidium sp.	5	MY2079	L4	extract	DMSO	15	44	59	-0.491525	yes
extract	Armadillidium sp.	5	MY2079	L4	isoamylalc	H2O	36	9	45	0.6	yes
extract	Armadillidium sp.	5	MY2079	L4	isoamylalc	EtOH	49	17	66	0.484848	yes
extract	Armadillidium sp.	5	MY2079	L4	isoamylalc	DMSO	40	11	51	0.568627	yes
extract	Armadillidium sp.	5	MY2079	L4	octanol	H2O	6	47	53	-0.773585	yes
extract	Armadillidium sp.	5	MY2079	L4	octanol	EtOH	10	37	47	-0.574468	yes
extract	Armadillidium sp.	5	MY2079	L4	octanol	DMSO	4	54	58	-0.862069	yes
extract	Armadillidium sp.	5	N2	L4	extract	H2O	19	36	55	-0.309091	yes
extract	Armadillidium sp.	5	N2	L4	extract	EtOH	27	39	66	-0.181818	yes
extract	Armadillidium sp.	5	N2	L4	extract	DMSO	21	37	58	-0.275862	yes
extract	Armadillidium sp.	5	N2	L4	isoamylalc	H2O	67	3	70	0.914286	yes
extract	Armadillidium sp.	5	N2	L4	isoamylalc	EtOH	43	5	48	0.791667	yes
extract	Armadillidium sp.	5	N2	L4	isoamylalc	DMSO	51	7	58	0.758621	yes
extract	Armadillidium sp.	5	N2	L4	octanol	H2O	11	28	39	-0.435897	yes
extract	Armadillidium sp.	5	N2	L4	octanol	EtOH	6	19	25	-0.52	yes
extract	Armadillidium sp.	5	N2	L4	octanol	DMSO	6	29	35	-0.657143	yes
extract	Armadillidium sp.	6	MY2079	L4	extract	H2O	24	33	57	-0.157895	yes
extract	Armadillidium sp.	6	MY2079	L4	extract	EtOH	26	26	52	0	yes
extract	Armadillidium sp.	6	MY2079	L4	extract	DMSO	22	30	52	-0.153846	yes
extract	Armadillidium sp.	6	MY2079	L4	isoamylalc	H2O	52	15	67	0.552239	yes
extract	Armadillidium sp.	6	MY2079	L4	isoamylalc	EtOH	39	9	48	0.625	yes
extract	Armadillidium sp.	6	MY2079	L4	isoamylalc	DMSO	58	8	66	0.757576	yes
extract	Armadillidium sp.	6	MY2079	L4	octanol	H2O	8	36	44	-0.636364	yes
extract	Armadillidium sp.	6	MY2079	L4	octanol	EtOH	8	45	53	-0.698113	yes
extract	Armadillidium sp.	6	MY2079	L4	octanol	DMSO	4	41	45	-0.822222	yes
extract	Armadillidium sp.	6	N2	L4	extract	H2O	22	22	44	0	yes
extract	Armadillidium sp.	6	N2	L4	extract	EtOH	27	30	57	-0.0526316	yes
extract	Armadillidium sp.	6	N2	L4	extract	DMSO	16	22	38	-0.157895	yes
extract	Armadillidium sp.	6	N2	L4	isoamylalc	H2O	40	0	40	1	yes
extract	Armadillidium sp.	6	N2	L4	isoamylalc	EtOH	35	6	41	0.707317	yes
extract	Armadillidium sp.	6	N2	L4	isoamylalc	DMSO	47	0	47	1	yes
extract	Armadillidium sp.	6	N2	L4	octanol	H2O	3	21	24	-0.75	yes
extract	Armadillidium sp.	6	N2	L4	octanol	EtOH	10	38	48	-0.583333	yes
extract	Armadillidium sp.	6	N2	L4	octanol	DMSO	4	22	26	-0.692308	yes
extract	Armadillidium sp.	7	MY2079	L4	extract	EtOH	45	44	89	0.011236	yes
extract	Armadillidium sp.	7	MY2079	L4	extract	DMSO	38	52	90	-0.155556	yes
extract	Armadillidium sp.	7	MY2079	L4	extract	H2O	34	46	80	-0.15	yes
extract	Armadillidium sp.	7	MY2079	L4	isoamylalc	EtOH	42	11	53	0.584906	yes
extract	Armadillidium sp.	7	MY2079	L4	isoamylalc	DMSO	47	11	58	0.62069	yes
extract	Armadillidium sp.	7	MY2079	L4	isoamylalc	H2O	64	22	86	0.488372	yes
extract	Armadillidium sp.	7	MY2079	L4	octanol	EtOH	7	69	76	-0.815789	yes
extract	Armadillidium sp.	7	MY2079	L4	octanol	DMSO	5	63	68	-0.852941	yes
extract	Armadillidium sp.	7	MY2079	L4	octanol	H2O	7	71	78	-0.820513	yes
extract	Armadillidium sp.	7	N2	L4	extract	EtOH	10	15	25	-0.2	yes
extract	Armadillidium sp.	7	N2	L4	extract	DMSO	18	28	46	-0.217391	yes
extract	Armadillidium sp.	7	N2	L4	extract	H2O	33	47	80	-0.175	yes
extract	Armadillidium sp.	7	N2	L4	isoamylalc	EtOH	77	11	88	0.75	yes
extract	Armadillidium sp.	7	N2	L4	isoamylalc	DMSO	104	17	121	0.719008	yes
extract	Armadillidium sp.	7	N2	L4	isoamylalc	H2O	69	6	75	0.84	yes
extract	Armadillidium sp.	7	N2	L4	octanol	EtOH	1	51	52	-0.961538	yes
extract	Armadillidium sp.	7	N2	L4	octanol	DMSO	5	58	63	-0.84127	yes
extract	Armadillidium sp.	7	N2	L4	octanol	H2O	8	53	61	-0.737705	yes
extract	Armadillidium sp.	8	MY2079	L4	extract	H2O	47	64	111	-0.153153	yes
extract	Armadillidium sp.	8	MY2079	L4	extract	DMSO	35	46	81	-0.135802	yes
extract	Armadillidium sp.	8	MY2079	L4	extract	EtOH	39	48	87	-0.103448	yes
extract	Armadillidium sp.	8	MY2079	L4	isoamylalc	H2O	109	44	153	0.424837	yes
extract	Armadillidium sp.	8	MY2079	L4	isoamylalc	DMSO	95	29	124	0.532258	yes
extract	Armadillidium sp.	8	MY2079	L4	isoamylalc	EtOH	108	52	160	0.35	yes
extract	Armadillidium sp.	8	MY2079	L4	octanol	H2O	20	103	123	-0.674797	yes
extract	Armadillidium sp.	8	MY2079	L4	octanol	DMSO	13	117	130	-0.8	yes
extract	Armadillidium sp.	8	MY2079	L4	octanol	EtOH	5	110	115	-0.913043	yes
extract	Armadillidium sp.	8	N2	L4	extract	H2O	52	86	138	-0.246377	yes
extract	Armadillidium sp.	8	N2	L4	extract	DMSO	40	39	79	0.0126582	yes
extract	Armadillidium sp.	8	N2	L4	extract	EtOH	34	38	72	-0.0555556	yes
extract	Armadillidium sp.	8	N2	L4	isoamylalc	H2O	85	11	96	0.770833	yes
extract	Armadillidium sp.	8	N2	L4	isoamylalc	DMSO	73	10	83	0.759036	yes
extract	Armadillidium sp.	8	N2	L4	isoamylalc	EtOH	64	15	79	0.620253	yes
extract	Armadillidium sp.	8	N2	L4	octanol	H2O	5	36	41	-0.756098	yes
extract	Armadillidium sp.	8	N2	L4	octanol	DMSO	17	80	97	-0.649485	yes
extract	Armadillidium sp.	8	N2	L4	octanol	EtOH	3	87	90	-0.933333	yes
extract	Armadillidium sp.	9	MY2079	L4	extract	H2O	10	19	29	-0.310345	yes
extract	Armadillidium sp.	9	MY2079	L4	extract	EtOH	13	29	42	-0.380952	yes
extract	Armadillidium sp.	9	MY2079	L4	extract	DMSO	22	37	59	-0.254237	yes
extract	Armadillidium sp.	9	MY2079	L4	isoamylalc	H2O	48	6	54	0.777778	yes
extract	Armadillidium sp.	9	MY2079	L4	isoamylalc	EtOH	51	7	58	0.758621	yes
extract	Armadillidium sp.	9	MY2079	L4	isoamylalc	DMSO	61	9	70	0.742857	yes
extract	Armadillidium sp.	9	MY2079	L4	octanol	H2O	21	34	55	-0.236364	yes
extract	Armadillidium sp.	9	MY2079	L4	octanol	EtOH	18	48	66	-0.454545	yes
extract	Armadillidium sp.	9	MY2079	L4	octanol	DMSO	6	36	42	-0.714286	yes
extract	Armadillidium sp.	9	N2	L4	extract	H2O	26	21	47	0.106383	yes
extract	Armadillidium sp.	9	N2	L4	extract	EtOH	11	20	31	-0.290323	yes
extract	Armadillidium sp.	9	N2	L4	extract	DMSO	32	28	60	0.0666667	yes
extract	Armadillidium sp.	9	N2	L4	isoamylalc	H2O	30	8	38	0.578947	yes
extract	Armadillidium sp.	9	N2	L4	isoamylalc	EtOH	51	8	59	0.728814	yes
extract	Armadillidium sp.	9	N2	L4	isoamylalc	DMSO	40	4	44	0.818182	yes
extract	Armadillidium sp.	9	N2	L4	octanol	H2O	7	21	28	-0.5	yes
extract	Armadillidium sp.	9	N2	L4	octanol	EtOH	6	22	28	-0.571429	yes
extract	Armadillidium sp.	9	N2	L4	octanol	DMSO	8	30	38	-0.578947	yes
extract	Armadillidium sp.	10	MY2079	L4	extract	DMSO	25	47	72	-0.305556	yes
extract	Armadillidium sp.	10	MY2079	L4	extract	EtOH	23	35	58	-0.206897	yes
extract	Armadillidium sp.	10	MY2079	L4	extract	H2O	32	39	71	-0.0985915	yes
extract	Armadillidium sp.	10	MY2079	L4	isoamylalc	DMSO	59	15	74	0.594595	yes
extract	Armadillidium sp.	10	MY2079	L4	isoamylalc	EtOH	43	16	59	0.457627	yes
extract	Armadillidium sp.	10	MY2079	L4	isoamylalc	H2O	67	18	85	0.576471	yes
extract	Armadillidium sp.	10	MY2079	L4	octanol	DMSO	6	73	79	-0.848101	yes
extract	Armadillidium sp.	10	MY2079	L4	octanol	EtOH	10	56	66	-0.69697	yes
extract	Armadillidium sp.	10	MY2079	L4	octanol	H2O	16	51	67	-0.522388	yes
extract	Armadillidium sp.	10	N2	L4	extract	DMSO	27	40	67	-0.19403	yes
extract	Armadillidium sp.	10	N2	L4	extract	EtOH	22	24	46	-0.0434783	yes
extract	Armadillidium sp.	10	N2	L4	extract	H2O	19	31	50	-0.24	yes
extract	Armadillidium sp.	10	N2	L4	isoamylalc	DMSO	36	6	42	0.714286	yes
extract	Armadillidium sp.	10	N2	L4	isoamylalc	EtOH	32	4	36	0.777778	yes
extract	Armadillidium sp.	10	N2	L4	isoamylalc	H2O	38	9	47	0.617021	yes
extract	Armadillidium sp.	10	N2	L4	octanol	DMSO	2	14	16	-0.75	yes
extract	Armadillidium sp.	10	N2	L4	octanol	EtOH	1	13	14	-0.857143	yes
extract	Armadillidium sp.	10	N2	L4	octanol	H2O	8	27	35	-0.542857	yes
extract	Armadillidium sp.	11	MY2079	L4	extract	DMSO	28	40	68	-0.176471	yes
extract	Armadillidium sp.	11	MY2079	L4	extract	DMSO	27	33	60	-0.1	yes
extract	Armadillidium sp.	11	MY2079	L4	extract	H2O	29	36	65	-0.107692	yes
extract	Armadillidium sp.	11	MY2079	L4	isoamylalc	DMSO	73	11	84	0.738095	yes
extract	Armadillidium sp.	11	MY2079	L4	isoamylalc	DMSO	66	6	72	0.833333	yes
extract	Armadillidium sp.	11	MY2079	L4	isoamylalc	H2O	41	10	51	0.607843	yes
extract	Armadillidium sp.	11	MY2079	L4	octanol	DMSO	6	71	77	-0.844156	yes
extract	Armadillidium sp.	11	MY2079	L4	octanol	DMSO	10	100	110	-0.818182	yes
extract	Armadillidium sp.	11	MY2079	L4	octanol	H2O	4	71	75	-0.893333	yes
extract	Armadillidium sp.	11	N2	L4	extract	DMSO	28	23	51	0.0980392	yes
extract	Armadillidium sp.	11	N2	L4	extract	DMSO	27	33	60	-0.1	yes
extract	Armadillidium sp.	11	N2	L4	extract	H2O	21	34	55	-0.236364	yes
extract	Armadillidium sp.	11	N2	L4	isoamylalc	DMSO	26	7	33	0.575758	yes
extract	Armadillidium sp.	11	N2	L4	isoamylalc	DMSO	51	5	56	0.821429	yes
extract	Armadillidium sp.	11	N2	L4	isoamylalc	H2O	46	8	54	0.703704	yes
extract	Armadillidium sp.	11	N2	L4	octanol	DMSO	10	31	41	-0.512195	yes
extract	Armadillidium sp.	11	N2	L4	octanol	DMSO	5	33	38	-0.736842	yes
extract	Armadillidium sp.	11	N2	L4	octanol	H2O	7	47	54	-0.740741	yes

## Sheet: 2D Armadillidium extract dauer
assay	invertebrate_species	rep	worm_strain	stage	choice_treat	solvent	count_treat	count_solvent	total	index	include	comments
extract	Armadillidium sp.	1	MY2079	dauer	octanol	DMSO	12	37	49	-0.510204	yes
extract	Armadillidium sp.	1	MY2079	dauer	tissue	EtOH	37	29	66	0.121212	yes
extract	Armadillidium sp.	1	MY2079	dauer	octanol	EtOH	16	51	67	-0.522388	yes
extract	Armadillidium sp.	1	MY2079	dauer	tissue	H2O	35	33	68	0.0294118	yes
extract	Armadillidium sp.	1	MY2079	dauer	octanol	H2O	34	39	73	-0.0684932	yes
extract	Armadillidium sp.	1	MY2079	dauer	isoamylalc	DMSO	49	30	79	0.240506	yes
extract	Armadillidium sp.	1	MY2079	dauer	isoamylalc	H2O	58	29	87	0.333333	yes
extract	Armadillidium sp.	1	MY2079	dauer	tissue	DMSO	48	41	89	0.0786517	yes
extract	Armadillidium sp.	1	MY2079	dauer	isoamylalc	EtOH	51	38	89	0.146067	yes
extract	Armadillidium sp.	1	N2	dauer	isoamylalc	H2O	0	0	0	NA	no	threshold not reached, exclude
extract	Armadillidium sp.	1	N2	dauer	isoamylalc	EtOH	0	1	1	NA	no	threshold not reached, exclude
extract	Armadillidium sp.	1	N2	dauer	isoamylalc	DMSO	1	1	2	NA	no	threshold not reached, exclude
extract	Armadillidium sp.	1	N2	dauer	tissue	DMSO	1	2	3	NA	no	threshold not reached, exclude
extract	Armadillidium sp.	1	N2	dauer	tissue	EtOH	1	2	3	NA	no	threshold not reached, exclude
extract	Armadillidium sp.	1	N2	dauer	octanol	EtOH	2	2	4	NA	no	threshold not reached, exclude
extract	Armadillidium sp.	1	N2	dauer	octanol	H2O	4	3	7	NA	no	threshold not reached, exclude
extract	Armadillidium sp.	1	N2	dauer	octanol	DMSO	4	5	9	NA	no	threshold not reached, exclude
extract	Armadillidium sp.	1	N2	dauer	tissue	H2O	4	7	11	-0.272727	yes
extract	Armadillidium sp.	2	MY2079	dauer	octanol	DMSO	9	15	24	-0.25	yes
extract	Armadillidium sp.	2	MY2079	dauer	isoamylalc	H2O	22	4	26	0.692308	yes
extract	Armadillidium sp.	2	MY2079	dauer	octanol	H2O	12	18	30	-0.2	yes
extract	Armadillidium sp.	2	MY2079	dauer	octanol	EtOH	17	13	30	0.133333	yes
extract	Armadillidium sp.	2	MY2079	dauer	isoamylalc	DMSO	18	13	31	0.16129	yes
extract	Armadillidium sp.	2	MY2079	dauer	isoamylalc	EtOH	34	6	40	0.7	yes
extract	Armadillidium sp.	2	MY2079	dauer	tissue	EtOH	22	22	44	0	yes
extract	Armadillidium sp.	2	MY2079	dauer	tissue	H2O	15	32	47	-0.361702	yes
extract	Armadillidium sp.	2	MY2079	dauer	tissue	DMSO	27	24	51	0.0588235	yes
extract	Armadillidium sp.	2	N2	dauer	isoamylalc	EtOH	0	3	3	NA	no	threshold not reached, exclude
extract	Armadillidium sp.	2	N2	dauer	octanol	EtOH	2	4	6	NA	no	threshold not reached, exclude
extract	Armadillidium sp.	2	N2	dauer	octanol	DMSO	2	5	7	NA	no	threshold not reached, exclude
extract	Armadillidium sp.	2	N2	dauer	isoamylalc	H2O	7	3	10	0.4	yes
extract	Armadillidium sp.	2	N2	dauer	octanol	H2O	5	7	12	-0.166667	yes
extract	Armadillidium sp.	2	N2	dauer	tissue	EtOH	6	7	13	-0.0769231	yes
extract	Armadillidium sp.	2	N2	dauer	isoamylalc	DMSO	11	3	14	0.571429	yes
extract	Armadillidium sp.	2	N2	dauer	tissue	H2O	6	12	18	-0.333333	yes
extract	Armadillidium sp.	2	N2	dauer	tissue	DMSO	10	10	20	0	yes
extract	Armadillidium sp.	3	MY2079	dauer	octanol	EtOH	9	21	30	-0.4	yes
extract	Armadillidium sp.	3	MY2079	dauer	isoamylalc	DMSO	15	20	35	-0.142857	yes
extract	Armadillidium sp.	3	MY2079	dauer	isoamylalc	EtOH	16	25	41	-0.219512	yes
extract	Armadillidium sp.	3	MY2079	dauer	octanol	DMSO	13	31	44	-0.409091	yes
extract	Armadillidium sp.	3	MY2079	dauer	tissue	H2O	25	22	47	0.0638298	yes
extract	Armadillidium sp.	3	MY2079	dauer	isoamylalc	H2O	34	15	49	0.387755	yes
extract	Armadillidium sp.	3	MY2079	dauer	tissue	DMSO	23	28	51	-0.0980392	yes
extract	Armadillidium sp.	3	MY2079	dauer	tissue	EtOH	28	23	51	0.0980392	yes
extract	Armadillidium sp.	3	MY2079	dauer	octanol	H2O	18	58	76	-0.526316	yes
extract	Armadillidium sp.	3	N2	dauer	isoamylalc	H2O	1	0	1	NA	no	threshold not reached, exclude
extract	Armadillidium sp.	3	N2	dauer	isoamylalc	DMSO	1	1	2	NA	no	threshold not reached, exclude
extract	Armadillidium sp.	3	N2	dauer	tissue	DMSO	0	2	2	NA	no	threshold not reached, exclude
extract	Armadillidium sp.	3	N2	dauer	isoamylalc	EtOH	1	1	2	NA	no	threshold not reached, exclude
extract	Armadillidium sp.	3	N2	dauer	octanol	EtOH	1	1	2	NA	no	threshold not reached, exclude
extract	Armadillidium sp.	3	N2	dauer	octanol	H2O	2	1	3	NA	no	threshold not reached, exclude
extract	Armadillidium sp.	3	N2	dauer	tissue	EtOH	2	1	3	NA	no	threshold not reached, exclude
extract	Armadillidium sp.	3	N2	dauer	tissue	H2O	2	2	4	NA	no	threshold not reached, exclude
extract	Armadillidium sp.	3	N2	dauer	octanol	DMSO	5	1	6	NA	no	threshold not reached, exclude
extract	Armadillidium sp.	4	MY2079	dauer	octanol	EtOH	11	11	22	0	yes
extract	Armadillidium sp.	4	MY2079	dauer	octanol	DMSO	14	18	32	-0.125	yes
extract	Armadillidium sp.	4	MY2079	dauer	octanol	H2O	16	27	43	-0.255814	yes
extract	Armadillidium sp.	4	MY2079	dauer	isoamylalc	DMSO	25	20	45	0.111111	yes
extract	Armadillidium sp.	4	MY2079	dauer	isoamylalc	H2O	30	20	50	0.2	yes
extract	Armadillidium sp.	4	MY2079	dauer	isoamylalc	EtOH	32	25	57	0.122807	yes
extract	Armadillidium sp.	4	MY2079	dauer	tissue	EtOH	32	32	64	0	yes
extract	Armadillidium sp.	4	MY2079	dauer	tissue	DMSO	28	40	68	-0.176471	yes
extract	Armadillidium sp.	4	MY2079	dauer	tissue	H2O	47	45	92	0.0217391	yes
extract	Armadillidium sp.	4	N2	dauer	octanol	EtOH	0	2	2	NA	no	threshold not reached, exclude
extract	Armadillidium sp.	4	N2	dauer	isoamylalc	H2O	1	3	4	NA	no	threshold not reached, exclude
extract	Armadillidium sp.	4	N2	dauer	tissue	EtOH	3	2	5	NA	no	threshold not reached, exclude
extract	Armadillidium sp.	4	N2	dauer	tissue	DMSO	2	4	6	NA	no	threshold not reached, exclude
extract	Armadillidium sp.	4	N2	dauer	octanol	H2O	4	2	6	NA	no	threshold not reached, exclude
extract	Armadillidium sp.	4	N2	dauer	tissue	H2O	1	6	7	NA	no	threshold not reached, exclude
extract	Armadillidium sp.	4	N2	dauer	isoamylalc	EtOH	6	1	7	NA	no	threshold not reached, exclude
extract	Armadillidium sp.	4	N2	dauer	isoamylalc	DMSO	3	5	8	NA	no	threshold not reached, exclude
extract	Armadillidium sp.	4	N2	dauer	octanol	DMSO	2	8	10	-0.6	yes
extract	Armadillidium sp.	5	MY2079	dauer	isoamylalc	EtOH	34	6	40	0.7	yes
extract	Armadillidium sp.	5	MY2079	dauer	octanol	DMSO	16	29	45	-0.288889	yes
extract	Armadillidium sp.	5	MY2079	dauer	tissue	DMSO	36	38	74	-0.027027	yes
extract	Armadillidium sp.	5	MY2079	dauer	tissue	EtOH	47	29	76	0.236842	yes
extract	Armadillidium sp.	5	MY2079	dauer	octanol	H2O	27	61	88	-0.386364	yes
extract	Armadillidium sp.	5	MY2079	dauer	isoamylalc	DMSO	74	17	91	0.626374	yes
extract	Armadillidium sp.	5	MY2079	dauer	isoamylalc	H2O	88	12	100	0.76	yes
extract	Armadillidium sp.	5	MY2079	dauer	octanol	EtOH	42	73	115	-0.269565	yes
extract	Armadillidium sp.	5	MY2079	dauer	tissue	H2O	79	60	139	0.136691	yes
extract	Armadillidium sp.	5	N2	dauer	tissue	EtOH	5	0	5	NA	no	threshold not reached, exclude
extract	Armadillidium sp.	5	N2	dauer	tissue	H2O	3	2	5	NA	no	threshold not reached, exclude
extract	Armadillidium sp.	5	N2	dauer	tissue	DMSO	6	3	9	NA	no	threshold not reached, exclude
extract	Armadillidium sp.	5	N2	dauer	octanol	EtOH	3	7	10	-0.4	yes
extract	Armadillidium sp.	5	N2	dauer	isoamylalc	DMSO	8	2	10	0.6	yes
extract	Armadillidium sp.	5	N2	dauer	isoamylalc	EtOH	7	5	12	0.166667	yes
extract	Armadillidium sp.	5	N2	dauer	octanol	H2O	1	12	13	-0.846154	yes
extract	Armadillidium sp.	5	N2	dauer	isoamylalc	H2O	12	2	14	0.714286	yes
extract	Armadillidium sp.	5	N2	dauer	octanol	DMSO	7	8	15	-0.0666667	yes
extract	Armadillidium sp.	6	MY2079	dauer	tissue	DMSO	30	37	67	-0.104478	yes
extract	Armadillidium sp.	6	MY2079	dauer	octanol	H2O	27	42	69	-0.217391	yes
extract	Armadillidium sp.	6	MY2079	dauer	isoamylalc	DMSO	65	18	83	0.566265	yes
extract	Armadillidium sp.	6	MY2079	dauer	isoamylalc	H2O	78	6	84	0.857143	yes
extract	Armadillidium sp.	6	MY2079	dauer	tissue	EtOH	44	45	89	-0.011236	yes
extract	Armadillidium sp.	6	MY2079	dauer	octanol	DMSO	47	44	91	0.032967	yes
extract	Armadillidium sp.	6	MY2079	dauer	tissue	H2O	44	50	94	-0.0638298	yes
extract	Armadillidium sp.	6	MY2079	dauer	isoamylalc	EtOH	81	21	102	0.588235	yes
extract	Armadillidium sp.	6	MY2079	dauer	octanol	EtOH	54	67	121	-0.107438	yes
extract	Armadillidium sp.	6	N2	dauer	octanol	DMSO	1	8	9	NA	no	threshold not reached, exclude
extract	Armadillidium sp.	6	N2	dauer	isoamylalc	H2O	7	5	12	0.166667	yes
extract	Armadillidium sp.	6	N2	dauer	tissue	H2O	9	4	13	0.384615	yes
extract	Armadillidium sp.	6	N2	dauer	tissue	DMSO	8	9	17	-0.0588235	yes
extract	Armadillidium sp.	6	N2	dauer	octanol	EtOH	6	13	19	-0.368421	yes
extract	Armadillidium sp.	6	N2	dauer	isoamylalc	EtOH	17	5	22	0.545455	yes
extract	Armadillidium sp.	6	N2	dauer	isoamylalc	DMSO	19	4	23	0.652174	yes
extract	Armadillidium sp.	6	N2	dauer	tissue	EtOH	18	12	30	0.2	yes
extract	Armadillidium sp.	6	N2	dauer	octanol	H2O	8	24	32	-0.5	yes
extract	Armadillidium sp.	7	MY2079	dauer	octanol	EtOH	53	59	112	-0.0535714	yes
extract	Armadillidium sp.	7	MY2079	dauer	isoamylalc	EtOH	75	57	132	0.136364	yes
extract	Armadillidium sp.	7	MY2079	dauer	tissue	EtOH	66	80	146	-0.0958904	yes
extract	Armadillidium sp.	7	MY2079	dauer	isoamylalc	H2O	130	56	186	0.397849	yes
extract	Armadillidium sp.	7	MY2079	dauer	octanol	DMSO	105	87	192	0.09375	yes
extract	Armadillidium sp.	7	MY2079	dauer	tissue	DMSO	73	121	194	-0.247423	yes
extract	Armadillidium sp.	7	MY2079	dauer	isoamylalc	DMSO	194	13	207	0.874396	yes
extract	Armadillidium sp.	7	MY2079	dauer	octanol	H2O	107	114	221	-0.0316742	yes
extract	Armadillidium sp.	7	MY2079	dauer	tissue	H2O	151	147	298	0.0134228	yes
extract	Armadillidium sp.	7	N2	dauer	tissue	DMSO	12	21	33	-0.272727	yes
extract	Armadillidium sp.	7	N2	dauer	tissue	EtOH	20	14	34	0.176471	yes
extract	Armadillidium sp.	7	N2	dauer	tissue	H2O	22	19	41	0.0731707	yes
extract	Armadillidium sp.	7	N2	dauer	octanol	DMSO	13	31	44	-0.409091	yes
extract	Armadillidium sp.	7	N2	dauer	octanol	EtOH	29	34	63	-0.0793651	yes
extract	Armadillidium sp.	7	N2	dauer	isoamylalc	EtOH	18	45	63	-0.428571	yes
extract	Armadillidium sp.	7	N2	dauer	isoamylalc	H2O	56	30	86	0.302326	yes
extract	Armadillidium sp.	8	MY2079	dauer	octanol	EtOH	62	74	136	-0.0882353	yes
extract	Armadillidium sp.	8	MY2079	dauer	octanol	DMSO	74	85	159	-0.0691824	yes
extract	Armadillidium sp.	8	MY2079	dauer	isoamylalc	DMSO	97	91	188	0.0319149	yes
extract	Armadillidium sp.	8	MY2079	dauer	tissue	DMSO	102	92	194	0.0515464	yes
extract	Armadillidium sp.	8	MY2079	dauer	octanol	H2O	92	106	198	-0.0707071	yes
extract	Armadillidium sp.	8	MY2079	dauer	tissue	EtOH	103	108	211	-0.0236967	yes
extract	Armadillidium sp.	8	MY2079	dauer	tissue	H2O	101	151	252	-0.198413	yes
extract	Armadillidium sp.	8	MY2079	dauer	isoamylalc	EtOH	153	117	270	0.133333	yes
extract	Armadillidium sp.	8	MY2079	dauer	isoamylalc	H2O	145	128	273	0.0622711	yes
extract	Armadillidium sp.	8	N2	dauer	isoamylalc	DMSO	10	2	12	0.666667	yes
extract	Armadillidium sp.	8	N2	dauer	isoamylalc	H2O	10	3	13	0.538462	yes
extract	Armadillidium sp.	8	N2	dauer	tissue	DMSO	7	7	14	0	yes
extract	Armadillidium sp.	8	N2	dauer	tissue	H2O	8	6	14	0.142857	yes
extract	Armadillidium sp.	8	N2	dauer	isoamylalc	EtOH	11	4	15	0.466667	yes
extract	Armadillidium sp.	8	N2	dauer	octanol	EtOH	12	7	19	0.263158	yes
extract	Armadillidium sp.	8	N2	dauer	octanol	DMSO	3	18	21	-0.714286	yes
extract	Armadillidium sp.	8	N2	dauer	tissue	EtOH	14	8	22	0.272727	yes
extract	Armadillidium sp.	8	N2	dauer	octanol	H2O	23	23	46	0	yes
extract	Armadillidium sp.	9	MY2079	dauer	octanol	H2O	14	2	16	0.75	yes
extract	Armadillidium sp.	9	MY2079	dauer	tissue	EtOH	62	55	117	0.0598291	yes
extract	Armadillidium sp.	9	MY2079	dauer	tissue	DMSO	56	63	119	-0.0588235	yes
extract	Armadillidium sp.	9	MY2079	dauer	tissue	H2O	63	61	124	0.016129	yes
extract	Armadillidium sp.	9	MY2079	dauer	isoamylalc	DMSO	105	49	154	0.363636	yes
extract	Armadillidium sp.	9	MY2079	dauer	isoamylalc	EtOH	85	81	166	0.0240964	yes
extract	Armadillidium sp.	9	MY2079	dauer	octanol	DMSO	113	98	211	0.07109	yes
extract	Armadillidium sp.	9	MY2079	dauer	octanol	EtOH	142	136	278	0.0215827	yes
extract	Armadillidium sp.	9	MY2079	dauer	isoamylalc	H2O	201	129	330	0.218182	yes
extract	Armadillidium sp.	9	N2	dauer	tissue	H2O	11	11	22	0	yes
extract	Armadillidium sp.	9	N2	dauer	tissue	DMSO	7	21	28	-0.5	yes
extract	Armadillidium sp.	9	N2	dauer	octanol	EtOH	13	16	29	-0.103448	yes
extract	Armadillidium sp.	9	N2	dauer	isoamylalc	DMSO	27	7	34	0.588235	yes
extract	Armadillidium sp.	9	N2	dauer	octanol	H2O	17	19	36	-0.0555556	yes
extract	Armadillidium sp.	9	N2	dauer	octanol	DMSO	17	20	37	-0.0810811	yes
extract	Armadillidium sp.	9	N2	dauer	isoamylalc	EtOH	24	13	37	0.297297	yes
extract	Armadillidium sp.	9	N2	dauer	tissue	EtOH	19	19	38	0	yes
extract	Armadillidium sp.	9	N2	dauer	isoamylalc	H2O	39	18	57	0.368421	yes
extract	Armadillidium sp.	10	MY2079	dauer	octanol	DMSO	23	34	57	-0.192982	yes
extract	Armadillidium sp.	10	MY2079	dauer	isoamylalc	H2O	49	29	78	0.25641	yes
extract	Armadillidium sp.	10	MY2079	dauer	tissue	DMSO	44	35	79	0.113924	yes
extract	Armadillidium sp.	10	MY2079	dauer	octanol	H2O	40	43	83	-0.0361446	yes
extract	Armadillidium sp.	10	MY2079	dauer	tissue	H2O	43	44	87	-0.0114943	yes
extract	Armadillidium sp.	10	MY2079	dauer	isoamylalc	DMSO	75	28	103	0.456311	yes
extract	Armadillidium sp.	10	MY2079	dauer	isoamylalc	EtOH	69	40	109	0.266055	yes
extract	Armadillidium sp.	10	MY2079	dauer	octanol	EtOH	47	63	110	-0.145455	yes
extract	Armadillidium sp.	10	MY2079	dauer	tissue	EtOH	58	69	127	-0.0866142	yes
extract	Armadillidium sp.	10	N2	dauer	isoamylalc	DMSO	5	5	10	0	yes
extract	Armadillidium sp.	10	N2	dauer	isoamylalc	H2O	6	4	10	0.2	yes
extract	Armadillidium sp.	10	N2	dauer	isoamylalc	EtOH	5	6	11	-0.0909091	yes
extract	Armadillidium sp.	10	N2	dauer	tissue	DMSO	7	7	14	0	yes
extract	Armadillidium sp.	10	N2	dauer	octanol	EtOH	7	8	15	-0.0666667	yes
extract	Armadillidium sp.	10	N2	dauer	tissue	H2O	4	11	15	-0.466667	yes
extract	Armadillidium sp.	10	N2	dauer	tissue	EtOH	7	12	19	-0.263158	yes
extract	Armadillidium sp.	10	N2	dauer	octanol	H2O	4	15	19	-0.578947	yes
extract	Armadillidium sp.	10	N2	dauer	octanol	DMSO	9	12	21	-0.142857	yes
extract	Armadillidium sp.	11	MY2079	dauer	isoamylalc	H2O	62	29	91	0.362637	yes
extract	Armadillidium sp.	11	MY2079	dauer	isoamylalc	EtOH	57	36	93	0.225806	yes
extract	Armadillidium sp.	11	MY2079	dauer	octanol	H2O	55	45	100	0.1	yes
extract	Armadillidium sp.	11	MY2079	dauer	octanol	DMSO	49	53	102	-0.0392157	yes
extract	Armadillidium sp.	11	MY2079	dauer	tissue	DMSO	62	42	104	0.192308	yes
extract	Armadillidium sp.	11	MY2079	dauer	tissue	EtOH	56	59	115	-0.026087	yes
extract	Armadillidium sp.	11	MY2079	dauer	isoamylalc	DMSO	80	39	119	0.344538	yes
extract	Armadillidium sp.	11	MY2079	dauer	tissue	H2O	65	56	121	0.0743802	yes
extract	Armadillidium sp.	11	MY2079	dauer	octanol	EtOH	63	64	127	-0.00787402	yes
extract	Armadillidium sp.	11	N2	dauer	tissue	DMSO	3	8	11	-0.454545	yes
extract	Armadillidium sp.	11	N2	dauer	tissue	EtOH	7	6	13	0.0769231	yes
extract	Armadillidium sp.	11	N2	dauer	isoamylalc	EtOH	9	7	16	0.125	yes
extract	Armadillidium sp.	11	N2	dauer	octanol	H2O	11	12	23	-0.0434783	yes
extract	Armadillidium sp.	11	N2	dauer	octanol	EtOH	8	16	24	-0.333333	yes
extract	Armadillidium sp.	11	N2	dauer	octanol	DMSO	12	18	30	-0.2	yes
extract	Armadillidium sp.	11	N2	dauer	isoamylalc	H2O	20	13	33	0.212121	yes
extract	Armadillidium sp.	11	N2	dauer	tissue	H2O	18	24	42	-0.142857	yes
extract	Armadillidium sp.	11	N2	dauer	isoamylalc	DMSO	14	69	83	-0.662651	yes
extract	Armadillidium sp.	12	MY2079	dauer	octanol	DMSO	52	90	142	-0.267606	yes
extract	Armadillidium sp.	12	MY2079	dauer	octanol	EtOH	60	87	147	-0.183673	yes
extract	Armadillidium sp.	12	MY2079	dauer	tissue	H2O	70	89	159	-0.119497	yes
extract	Armadillidium sp.	12	MY2079	dauer	tissue	EtOH	75	88	163	-0.0797546	yes
extract	Armadillidium sp.	12	MY2079	dauer	isoamylalc	DMSO	102	69	171	0.192982	yes
extract	Armadillidium sp.	12	MY2079	dauer	octanol	H2O	97	101	198	-0.020202	yes
extract	Armadillidium sp.	12	MY2079	dauer	tissue	DMSO	96	110	206	-0.0679612	yes
extract	Armadillidium sp.	12	MY2079	dauer	isoamylalc	EtOH	159	67	226	0.40708	yes
extract	Armadillidium sp.	12	MY2079	dauer	isoamylalc	H2O	166	87	253	0.312253	yes
extract	Armadillidium sp.	12	N2	dauer	tissue	DMSO	3	7	10	-0.4	yes
extract	Armadillidium sp.	12	N2	dauer	octanol	DMSO	5	12	17	-0.411765	yes
extract	Armadillidium sp.	12	N2	dauer	octanol	EtOH	8	10	18	-0.111111	yes
extract	Armadillidium sp.	12	N2	dauer	isoamylalc	H2O	9	11	20	-0.1	yes
extract	Armadillidium sp.	12	N2	dauer	isoamylalc	EtOH	8	14	22	-0.272727	yes
extract	Armadillidium sp.	12	N2	dauer	tissue	H2O	11	14	25	-0.12	yes
extract	Armadillidium sp.	12	N2	dauer	tissue	EtOH	14	15	29	-0.0344828	yes
extract	Armadillidium sp.	12	N2	dauer	isoamylalc	DMSO	17	13	30	0.133333	yes
extract	Armadillidium sp.	12	N2	dauer	octanol	H2O	10	23	33	-0.393939	yes
extract	Armadillidium sp.	13	N2	dauer	tissue	EtOH	4	13	17	-0.529412	yes
extract	Armadillidium sp.	13	N2	dauer	isoamylalc	EtOH	10	8	18	0.111111	yes
extract	Armadillidium sp.	13	N2	dauer	octanol	EtOH	15	14	29	0.0344828	yes
extract	Armadillidium sp.	13	N2	dauer	tissue	H2O	13	11	24	0.0833333	yes
extract	Armadillidium sp.	13	N2	dauer	isoamylalc	H2O	10	9	19	0.0526316	yes
extract	Armadillidium sp.	13	N2	dauer	octanol	H2O	20	29	49	-0.183673	yes
extract	Armadillidium sp.	13	N2	dauer	tissue	DMSO	1	8	9	NA	no	threshold not reached, exclude
extract	Armadillidium sp.	13	N2	dauer	isoamylalc	DMSO	9	4	13	0.384615	yes
extract	Armadillidium sp.	13	N2	dauer	octanol	DMSO	19	21	40	-0.05	yes
extract	Armadillidium sp.	14	MY2079	dauer	octanol	DMSO	23	60	83	-0.445783	yes
extract	Armadillidium sp.	14	MY2079	dauer	isoamylalc	DMSO	120	20	140	0.714286	yes
extract	Armadillidium sp.	14	MY2079	dauer	tissue	DMSO	54	62	116	-0.0689655	yes
extract	Armadillidium sp.	14	MY2079	dauer	octanol	EtOH	24	49	73	-0.342466	yes
extract	Armadillidium sp.	14	MY2079	dauer	isoamylalc	EtOH	90	13	103	0.747573	yes
extract	Armadillidium sp.	14	MY2079	dauer	tissue	EtOH	64	110	174	-0.264368	yes
extract	Armadillidium sp.	14	MY2079	dauer	octanol	H2O	36	61	97	-0.257732	yes
extract	Armadillidium sp.	14	MY2079	dauer	isoamylalc	H2O	177	21	198	0.787879	yes
extract	Armadillidium sp.	14	MY2079	dauer	tissue	H2O	76	69	145	0.0482759	yes
extract	Armadillidium sp.	14	N2	dauer	octanol	DMSO	25	28	53	-0.0566038	yes
extract	Armadillidium sp.	14	N2	dauer	isoamylalc	DMSO	5	7	12	-0.166667	yes
extract	Armadillidium sp.	14	N2	dauer	tissue	DMSO	10	7	17	0.176471	yes
extract	Armadillidium sp.	14	N2	dauer	octanol	EtOH	9	18	27	-0.333333	yes
extract	Armadillidium sp.	14	N2	dauer	isoamylalc	EtOH	13	6	19	0.368421	yes
extract	Armadillidium sp.	14	N2	dauer	tissue	EtOH	10	17	27	-0.259259	yes
extract	Armadillidium sp.	14	N2	dauer	octanol	H2O	24	27	51	-0.0588235	yes
extract	Armadillidium sp.	14	N2	dauer	isoamylalc	H2O	4	10	14	-0.428571	yes
extract	Armadillidium sp.	14	N2	dauer	tissue	H2O	18	14	32	0.125	yes
extract	Armadillidium sp.	15	N2	dauer	tissue	H2O	12	3	15	0.6	yes
extract	Armadillidium sp.	15	N2	dauer	isoamylalc	H2O	5	6	11	-0.0909091	yes
extract	Armadillidium sp.	15	N2	dauer	octanol	H2O	16	18	34	-0.0588235	yes
extract	Armadillidium sp.	15	N2	dauer	tissue	DMSO	3	7	10	-0.4	yes
extract	Armadillidium sp.	15	N2	dauer	isoamylalc	DMSO	10	4	14	0.428571	yes
extract	Armadillidium sp.	15	N2	dauer	octanol	DMSO	17	26	43	-0.209302	yes
extract	Armadillidium sp.	15	N2	dauer	tissue	EtOH	7	5	12	0.166667	yes
extract	Armadillidium sp.	15	N2	dauer	isoamylalc	EtOH	3	4	7	NA	no	threshold not reached, exclude
extract	Armadillidium sp.	15	N2	dauer	octanol	EtOH	16	22	38	-0.157895	yes
extract	Armadillidium sp.	16	N2	dauer	tissue	H2O	8	6	14	0.142857	yes
extract	Armadillidium sp.	16	N2	dauer	isoamylalc	H2O	5	6	11	-0.0909091	yes
extract	Armadillidium sp.	16	N2	dauer	octanol	H2O	8	11	19	-0.157895	yes
extract	Armadillidium sp.	16	N2	dauer	tissue	DMSO	5	5	10	0	yes
extract	Armadillidium sp.	16	N2	dauer	isoamylalc	DMSO	5	10	15	-0.333333	yes
extract	Armadillidium sp.	16	N2	dauer	octanol	DMSO	8	15	23	-0.304348	yes
extract	Armadillidium sp.	16	N2	dauer	tissue	EtOH	8	9	17	-0.0588235	yes
extract	Armadillidium sp.	16	N2	dauer	isoamylalc	EtOH	16	13	29	0.103448	yes
extract	Armadillidium sp.	16	N2	dauer	octanol	EtOH	5	6	11	-0.0909091	yes
extract	Armadillidium sp.	17	N2	dauer	tissue	H2O	8	5	13	0.230769	yes
extract	Armadillidium sp.	17	N2	dauer	isoamylalc	H2O	10	4	14	0.428571	yes
extract	Armadillidium sp.	17	N2	dauer	octanol	H2O	26	20	46	0.130435	yes
extract	Armadillidium sp.	17	N2	dauer	tissue	DMSO	6	6	12	0	yes
extract	Armadillidium sp.	17	N2	dauer	isoamylalc	DMSO	13	8	21	0.238095	yes
extract	Armadillidium sp.	17	N2	dauer	octanol	DMSO	11	24	35	-0.371429	yes
extract	Armadillidium sp.	17	N2	dauer	tissue	EtOH	4	7	11	-0.272727	yes
extract	Armadillidium sp.	17	N2	dauer	isoamylalc	EtOH	5	8	13	-0.230769	yes
extract	Armadillidium sp.	17	N2	dauer	octanol	EtOH	16	11	27	0.185185	yes
extract	Armadillidium sp.	18	N2	dauer	tissue	H2O	5	6	11	-0.0909091	yes
extract	Armadillidium sp.	18	N2	dauer	isoamylalc	H2O	6	4	10	0.2	yes
extract	Armadillidium sp.	18	N2	dauer	octanol	H2O	17	11	28	0.214286	yes
extract	Armadillidium sp.	18	N2	dauer	tissue	DMSO	9	18	27	-0.333333	yes
extract	Armadillidium sp.	18	N2	dauer	isoamylalc	DMSO	11	9	20	0.1	yes
extract	Armadillidium sp.	18	N2	dauer	octanol	DMSO	7	12	19	-0.263158	yes
extract	Armadillidium sp.	18	N2	dauer	tissue	EtOH	9	8	17	0.0588235	yes
extract	Armadillidium sp.	18	N2	dauer	isoamylalc	EtOH	9	4	13	0.384615	yes
extract	Armadillidium sp.	18	N2	dauer	octanol	EtOH	5	12	17	-0.411765	yes

## Sheet: 2E Lithobius extract L4
assay	invertebrate_species	rep	worm_strain	stage	choice_treat	solvent	count_treat	count_solvent	total	index	include	comments
extract	Luthobius sp.	1	MY2079	L4	extract	DMSO	31	24	55	0.127273	yes
extract	Luthobius sp.	1	MY2079	L4	extract	EtOH	40	65	105	-0.238095	yes
extract	Luthobius sp.	1	MY2079	L4	extract	H2O	47	30	77	0.220779	yes
extract	Luthobius sp.	1	MY2079	L4	isoamylalc	DMSO	36	2	38	0.894737	yes
extract	Luthobius sp.	1	MY2079	L4	isoamylalc	EtOH	52	5	57	0.824561	yes
extract	Luthobius sp.	1	MY2079	L4	isoamylalc	H2O	33	5	38	0.736842	yes
extract	Luthobius sp.	1	MY2079	L4	octanol	DMSO	26	42	68	-0.235294	yes
extract	Luthobius sp.	1	MY2079	L4	octanol	EtOH	16	58	74	-0.567568	yes
extract	Luthobius sp.	1	MY2079	L4	octanol	H2O	47	43	90	0.0444444	yes
extract	Luthobius sp.	1	N2	L4	extract	DMSO	26	32	58	-0.103448	yes
extract	Luthobius sp.	1	N2	L4	extract	EtOH	17	38	55	-0.381818	yes
extract	Luthobius sp.	1	N2	L4	extract	H2O	33	51	84	-0.214286	yes
extract	Luthobius sp.	1	N2	L4	isoamylalc	DMSO	109	14	123	0.772358	yes
extract	Luthobius sp.	1	N2	L4	isoamylalc	EtOH	64	8	72	0.777778	yes
extract	Luthobius sp.	1	N2	L4	isoamylalc	H2O	82	1	83	0.975904	yes
extract	Luthobius sp.	1	N2	L4	octanol	DMSO	19	43	62	-0.387097	yes
extract	Luthobius sp.	1	N2	L4	octanol	EtOH	11	25	36	-0.388889	yes
extract	Luthobius sp.	1	N2	L4	octanol	H2O	6	19	25	-0.52	yes
extract	Luthobius sp.	2	MY2079	L4	extract	DMSO	29	33	62	-0.0645161	yes
extract	Luthobius sp.	2	MY2079	L4	extract	EtOH	25	48	73	-0.315068	yes
extract	Luthobius sp.	2	MY2079	L4	extract	H2O	35	47	82	-0.146341	yes
extract	Luthobius sp.	2	MY2079	L4	isoamylalc	DMSO	73	13	86	0.697674	yes
extract	Luthobius sp.	2	MY2079	L4	isoamylalc	EtOH	66	14	80	0.65	yes
extract	Luthobius sp.	2	MY2079	L4	isoamylalc	H2O	69	12	81	0.703704	yes
extract	Luthobius sp.	2	MY2079	L4	octanol	DMSO	6	50	56	-0.785714	yes
extract	Luthobius sp.	2	MY2079	L4	octanol	EtOH	4	56	60	-0.866667	yes
extract	Luthobius sp.	2	MY2079	L4	octanol	H2O	16	27	43	-0.255814	yes
extract	Luthobius sp.	2	N2	L4	extract	DMSO	23	27	50	-0.08	yes
extract	Luthobius sp.	2	N2	L4	extract	EtOH	15	25	40	-0.25	yes
extract	Luthobius sp.	2	N2	L4	extract	H2O	22	25	47	-0.0638298	yes
extract	Luthobius sp.	2	N2	L4	isoamylalc	DMSO	66	11	77	0.714286	yes
extract	Luthobius sp.	2	N2	L4	isoamylalc	EtOH	26	4	30	0.733333	yes
extract	Luthobius sp.	2	N2	L4	isoamylalc	H2O	51	7	58	0.758621	yes
extract	Luthobius sp.	2	N2	L4	octanol	DMSO	9	39	48	-0.625	yes
extract	Luthobius sp.	2	N2	L4	octanol	EtOH	15	36	51	-0.411765	yes
extract	Luthobius sp.	2	N2	L4	octanol	H2O	7	44	51	-0.72549	yes
extract	Luthobius sp.	3	MY2079	L4	extract	DMSO	26	44	70	-0.257143	yes
extract	Luthobius sp.	3	MY2079	L4	extract	EtOH	39	49	88	-0.113636	yes
extract	Luthobius sp.	3	MY2079	L4	extract	H2O	74	64	138	0.0724638	yes
extract	Luthobius sp.	3	MY2079	L4	isoamylalc	DMSO	27	3	30	0.8	yes
extract	Luthobius sp.	3	MY2079	L4	isoamylalc	EtOH	66	15	81	0.62963	yes
extract	Luthobius sp.	3	MY2079	L4	isoamylalc	H2O	70	10	80	0.75	yes
extract	Luthobius sp.	3	MY2079	L4	octanol	DMSO	2	40	42	-0.904762	yes
extract	Luthobius sp.	3	MY2079	L4	octanol	EtOH	4	75	79	-0.898734	yes
extract	Luthobius sp.	3	MY2079	L4	octanol	H2O	5	42	47	-0.787234	yes
extract	Luthobius sp.	3	N2	L4	extract	DMSO	33	34	67	-0.0149254	yes
extract	Luthobius sp.	3	N2	L4	extract	EtOH	30	42	72	-0.166667	yes
extract	Luthobius sp.	3	N2	L4	extract	H2O	35	29	64	0.09375	yes
extract	Luthobius sp.	3	N2	L4	isoamylalc	DMSO	41	3	44	0.863636	yes
extract	Luthobius sp.	3	N2	L4	isoamylalc	EtOH	79	6	85	0.858824	yes
extract	Luthobius sp.	3	N2	L4	isoamylalc	H2O	71	5	76	0.868421	yes
extract	Luthobius sp.	3	N2	L4	octanol	DMSO	20	99	119	-0.663866	yes
extract	Luthobius sp.	3	N2	L4	octanol	EtOH	8	71	79	-0.797468	yes
extract	Luthobius sp.	3	N2	L4	octanol	H2O	6	79	85	-0.858824	yes
extract	Luthobius sp.	4	MY2079	L4	extract	DMSO	24	41	65	-0.261538	yes
extract	Luthobius sp.	4	MY2079	L4	extract	EtOH	38	21	59	0.288136	yes
extract	Luthobius sp.	4	MY2079	L4	extract	H2O	25	26	51	-0.0196078	yes
extract	Luthobius sp.	4	MY2079	L4	isoamylalc	DMSO	77	9	86	0.790698	yes
extract	Luthobius sp.	4	MY2079	L4	isoamylalc	EtOH	47	13	60	0.566667	yes
extract	Luthobius sp.	4	MY2079	L4	isoamylalc	H2O	48	19	67	0.432836	yes
extract	Luthobius sp.	4	MY2079	L4	octanol	DMSO	5	54	59	-0.830508	yes
extract	Luthobius sp.	4	MY2079	L4	octanol	EtOH	6	53	59	-0.79661	yes
extract	Luthobius sp.	4	MY2079	L4	octanol	H2O	6	54	60	-0.8	yes
extract	Luthobius sp.	4	N2	L4	extract	DMSO	18	25	43	-0.162791	yes
extract	Luthobius sp.	4	N2	L4	extract	EtOH	23	25	48	-0.0416667	yes
extract	Luthobius sp.	4	N2	L4	extract	H2O	26	23	49	0.0612245	yes
extract	Luthobius sp.	4	N2	L4	isoamylalc	DMSO	43	12	55	0.563636	yes
extract	Luthobius sp.	4	N2	L4	isoamylalc	EtOH	36	13	49	0.469388	yes
extract	Luthobius sp.	4	N2	L4	isoamylalc	H2O	38	8	46	0.652174	yes
extract	Luthobius sp.	4	N2	L4	octanol	DMSO	8	45	53	-0.698113	yes
extract	Luthobius sp.	4	N2	L4	octanol	EtOH	5	53	58	-0.827586	yes
extract	Luthobius sp.	4	N2	L4	octanol	H2O	9	30	39	-0.538462	yes
extract	Luthobius sp.	5	MY2079	L4	extract	DMSO	19	31	50	-0.24	yes
extract	Luthobius sp.	5	MY2079	L4	extract	EtOH	25	38	63	-0.206349	yes
extract	Luthobius sp.	5	MY2079	L4	extract	H2O	22	31	53	-0.169811	yes
extract	Luthobius sp.	5	MY2079	L4	isoamylalc	DMSO	61	8	69	0.768116	yes
extract	Luthobius sp.	5	MY2079	L4	isoamylalc	EtOH	50	10	60	0.666667	yes
extract	Luthobius sp.	5	MY2079	L4	isoamylalc	H2O	30	12	42	0.428571	yes
extract	Luthobius sp.	5	MY2079	L4	octanol	DMSO	24	65	89	-0.460674	yes
extract	Luthobius sp.	5	MY2079	L4	octanol	EtOH	7	34	41	-0.658537	yes
extract	Luthobius sp.	5	MY2079	L4	octanol	H2O	4	34	38	-0.789474	yes
extract	Luthobius sp.	5	N2	L4	extract	DMSO	37	25	62	0.193548	yes
extract	Luthobius sp.	5	N2	L4	extract	EtOH	27	44	71	-0.239437	yes
extract	Luthobius sp.	5	N2	L4	extract	H2O	30	32	62	-0.0322581	yes
extract	Luthobius sp.	5	N2	L4	isoamylalc	DMSO	71	6	77	0.844156	yes
extract	Luthobius sp.	5	N2	L4	isoamylalc	EtOH	54	14	68	0.588235	yes
extract	Luthobius sp.	5	N2	L4	isoamylalc	H2O	65	14	79	0.64557	yes
extract	Luthobius sp.	5	N2	L4	octanol	DMSO	5	35	40	-0.75	yes
extract	Luthobius sp.	5	N2	L4	octanol	EtOH	6	44	50	-0.76	yes
extract	Luthobius sp.	5	N2	L4	octanol	H2O	8	39	47	-0.659574	yes
extract	Luthobius sp.	6	MY2079	L4	extract	DMSO	30	6	36	0.666667	yes
extract	Luthobius sp.	6	MY2079	L4	extract	EtOH	13	31	44	-0.409091	yes
extract	Luthobius sp.	6	MY2079	L4	extract	H2O	34	16	50	0.36	yes
extract	Luthobius sp.	6	MY2079	L4	isoamylalc	DMSO	76	14	90	0.688889	yes
extract	Luthobius sp.	6	MY2079	L4	isoamylalc	EtOH	89	22	111	0.603604	yes
extract	Luthobius sp.	6	MY2079	L4	isoamylalc	H2O	57	17	74	0.540541	yes
extract	Luthobius sp.	6	MY2079	L4	octanol	DMSO	19	56	75	-0.493333	yes
extract	Luthobius sp.	6	MY2079	L4	octanol	EtOH	6	40	46	-0.73913	yes
extract	Luthobius sp.	6	MY2079	L4	octanol	H2O	1	50	51	-0.960784	yes
extract	Luthobius sp.	6	N2	L4	extract	DMSO	27	46	73	-0.260274	yes
extract	Luthobius sp.	6	N2	L4	extract	EtOH	20	27	47	-0.148936	yes
extract	Luthobius sp.	6	N2	L4	extract	H2O	15	29	44	-0.318182	yes
extract	Luthobius sp.	6	N2	L4	isoamylalc	DMSO	88	31	119	0.478992	yes
extract	Luthobius sp.	6	N2	L4	isoamylalc	EtOH	68	20	88	0.545455	yes
extract	Luthobius sp.	6	N2	L4	isoamylalc	H2O	30	29	59	0.0169492	yes
extract	Luthobius sp.	6	N2	L4	octanol	DMSO	5	8	13	-0.230769	yes
extract	Luthobius sp.	6	N2	L4	octanol	EtOH	21	56	77	-0.454545	yes
extract	Luthobius sp.	6	N2	L4	octanol	H2O	7	78	85	-0.835294	yes
extract	Luthobius sp.	7	MY2079	L4	extract	DMSO	32	32	64	0	yes
extract	Luthobius sp.	7	MY2079	L4	extract	EtOH	27	33	60	-0.1	yes
extract	Luthobius sp.	7	MY2079	L4	extract	H2O	19	33	52	-0.269231	yes
extract	Luthobius sp.	7	MY2079	L4	isoamylalc	DMSO	60	9	69	0.73913	yes
extract	Luthobius sp.	7	MY2079	L4	isoamylalc	EtOH	41	11	52	0.576923	yes
extract	Luthobius sp.	7	MY2079	L4	isoamylalc	H2O	43	9	52	0.653846	yes
extract	Luthobius sp.	7	MY2079	L4	octanol	DMSO	3	49	52	-0.884615	yes
extract	Luthobius sp.	7	MY2079	L4	octanol	EtOH	3	61	64	-0.90625	yes
extract	Luthobius sp.	7	MY2079	L4	octanol	H2O	1	49	50	-0.96	yes
extract	Luthobius sp.	7	N2	L4	extract	DMSO	28	39	67	-0.164179	yes
extract	Luthobius sp.	7	N2	L4	extract	EtOH	30	34	64	-0.0625	yes
extract	Luthobius sp.	7	N2	L4	extract	H2O	28	43	71	-0.211268	yes
extract	Luthobius sp.	7	N2	L4	isoamylalc	DMSO	56	14	70	0.6	yes
extract	Luthobius sp.	7	N2	L4	isoamylalc	EtOH	52	16	68	0.529412	yes
extract	Luthobius sp.	7	N2	L4	isoamylalc	H2O	56	13	69	0.623188	yes
extract	Luthobius sp.	7	N2	L4	octanol	DMSO	9	32	41	-0.560976	yes
extract	Luthobius sp.	7	N2	L4	octanol	EtOH	14	64	78	-0.641026	yes
extract	Luthobius sp.	7	N2	L4	octanol	H2O	11	37	48	-0.541667	yes
extract	Luthobius sp.	8	MY2079	L4	extract	DMSO	35	49	84	-0.166667	yes
extract	Luthobius sp.	8	MY2079	L4	extract	EtOH	25	27	52	-0.0384615	yes
extract	Luthobius sp.	8	MY2079	L4	extract	H2O	17	48	65	-0.476923	yes
extract	Luthobius sp.	8	MY2079	L4	isoamylalc	DMSO	52	3	55	0.890909	yes
extract	Luthobius sp.	8	MY2079	L4	isoamylalc	EtOH	58	7	65	0.784615	yes
extract	Luthobius sp.	8	MY2079	L4	isoamylalc	H2O	21	18	39	0.0769231	yes
extract	Luthobius sp.	8	MY2079	L4	octanol	DMSO	18	30	48	-0.25	yes
extract	Luthobius sp.	8	MY2079	L4	octanol	EtOH	19	29	48	-0.208333	yes
extract	Luthobius sp.	8	MY2079	L4	octanol	H2O	14	38	52	-0.461538	yes
extract	Luthobius sp.	8	N2	L4	extract	DMSO	31	24	55	0.127273	yes
extract	Luthobius sp.	8	N2	L4	extract	EtOH	12	4	16	0.5	yes
extract	Luthobius sp.	8	N2	L4	extract	H2O	34	35	69	-0.0144928	yes
extract	Luthobius sp.	8	N2	L4	isoamylalc	DMSO	51	2	53	0.924528	yes
extract	Luthobius sp.	8	N2	L4	isoamylalc	EtOH	15	12	27	0.111111	yes
extract	Luthobius sp.	8	N2	L4	isoamylalc	H2O	59	6	65	0.815385	yes
extract	Luthobius sp.	8	N2	L4	octanol	DMSO	7	32	39	-0.641026	yes
extract	Luthobius sp.	8	N2	L4	octanol	EtOH	10	41	51	-0.607843	yes
extract	Luthobius sp.	8	N2	L4	octanol	H2O	10	37	47	-0.574468	yes
extract	Luthobius sp.	9	MY2079	L4	extract	DMSO	31	37	68	-0.0882353	yes
extract	Luthobius sp.	9	MY2079	L4	extract	EtOH	24	37	61	-0.213115	yes
extract	Luthobius sp.	9	MY2079	L4	extract	H2O	42	31	73	0.150685	yes
extract	Luthobius sp.	9	MY2079	L4	isoamylalc	DMSO	44	7	51	0.72549	yes
extract	Luthobius sp.	9	MY2079	L4	isoamylalc	EtOH	66	13	79	0.670886	yes
extract	Luthobius sp.	9	MY2079	L4	isoamylalc	H2O	62	10	72	0.722222	yes
extract	Luthobius sp.	9	MY2079	L4	octanol	DMSO	0	58	58	-1	yes
extract	Luthobius sp.	9	MY2079	L4	octanol	EtOH	2	57	59	-0.932203	yes
extract	Luthobius sp.	9	MY2079	L4	octanol	H2O	5	45	50	-0.8	yes
extract	Luthobius sp.	9	N2	L4	extract	DMSO	19	24	43	-0.116279	yes
extract	Luthobius sp.	9	N2	L4	extract	EtOH	20	44	64	-0.375	yes
extract	Luthobius sp.	9	N2	L4	extract	H2O	29	32	61	-0.0491803	yes
extract	Luthobius sp.	9	N2	L4	isoamylalc	DMSO	61	7	68	0.794118	yes
extract	Luthobius sp.	9	N2	L4	isoamylalc	EtOH	69	13	82	0.682927	yes
extract	Luthobius sp.	9	N2	L4	isoamylalc	H2O	53	16	69	0.536232	yes
extract	Luthobius sp.	9	N2	L4	octanol	DMSO	12	35	47	-0.489362	yes
extract	Luthobius sp.	9	N2	L4	octanol	EtOH	15	42	57	-0.473684	yes
extract	Luthobius sp.	9	N2	L4	octanol	H2O	6	51	57	-0.789474	yes
extract	Luthobius sp.	10	MY2079	L4	extract	DMSO	44	38	82	0.0731707	yes
extract	Luthobius sp.	10	MY2079	L4	extract	EtOH	30	37	67	-0.104478	yes
extract	Luthobius sp.	10	MY2079	L4	extract	H2O	24	29	53	-0.0943396	yes
extract	Luthobius sp.	10	MY2079	L4	isoamylalc	DMSO	55	2	57	0.929825	yes
extract	Luthobius sp.	10	MY2079	L4	isoamylalc	EtOH	41	5	46	0.782609	yes
extract	Luthobius sp.	10	MY2079	L4	isoamylalc	H2O	34	5	39	0.74359	yes
extract	Luthobius sp.	10	MY2079	L4	octanol	DMSO	10	44	54	-0.62963	yes
extract	Luthobius sp.	10	MY2079	L4	octanol	EtOH	8	34	42	-0.619048	yes
extract	Luthobius sp.	10	MY2079	L4	octanol	H2O	3	46	49	-0.877551	yes
extract	Luthobius sp.	10	N2	L4	extract	DMSO	18	23	41	-0.121951	yes
extract	Luthobius sp.	10	N2	L4	extract	EtOH	20	34	54	-0.259259	yes
extract	Luthobius sp.	10	N2	L4	extract	H2O	24	27	51	-0.0588235	yes
extract	Luthobius sp.	10	N2	L4	isoamylalc	DMSO	46	13	59	0.559322	yes
extract	Luthobius sp.	10	N2	L4	isoamylalc	EtOH	39	6	45	0.733333	yes
extract	Luthobius sp.	10	N2	L4	isoamylalc	H2O	48	11	59	0.627119	yes
extract	Luthobius sp.	10	N2	L4	octanol	DMSO	7	24	31	-0.548387	yes
extract	Luthobius sp.	10	N2	L4	octanol	EtOH	9	59	68	-0.735294	yes
extract	Luthobius sp.	10	N2	L4	octanol	H2O	4	31	35	-0.771429	yes
extract	Luthobius sp.	11	MY2079	L4	extract	DMSO	30	28	58	0.0344828	yes
extract	Luthobius sp.	11	MY2079	L4	extract	EtOH	33	33	66	0	yes
extract	Luthobius sp.	11	MY2079	L4	extract	H2O	40	25	65	0.230769	yes
extract	Luthobius sp.	11	MY2079	L4	isoamylalc	DMSO	66	18	84	0.571429	yes
extract	Luthobius sp.	11	MY2079	L4	isoamylalc	EtOH	39	14	53	0.471698	yes
extract	Luthobius sp.	11	MY2079	L4	isoamylalc	H2O	50	8	58	0.724138	yes
extract	Luthobius sp.	11	MY2079	L4	octanol	DMSO	5	62	67	-0.850746	yes
extract	Luthobius sp.	11	MY2079	L4	octanol	EtOH	19	43	62	-0.387097	yes
extract	Luthobius sp.	11	MY2079	L4	octanol	H2O	0	44	44	-1	yes
extract	Luthobius sp.	11	N2	L4	extract	DMSO	53	51	104	0.0192308	yes
extract	Luthobius sp.	11	N2	L4	extract	EtOH	22	26	48	-0.0833333	yes
extract	Luthobius sp.	11	N2	L4	extract	H2O	22	35	57	-0.22807	yes
extract	Luthobius sp.	11	N2	L4	isoamylalc	DMSO	56	13	69	0.623188	yes
extract	Luthobius sp.	11	N2	L4	isoamylalc	EtOH	84	26	110	0.527273	yes
extract	Luthobius sp.	11	N2	L4	isoamylalc	H2O	74	7	81	0.82716	yes
extract	Luthobius sp.	11	N2	L4	octanol	DMSO	8	66	74	-0.783784	yes
extract	Luthobius sp.	11	N2	L4	octanol	EtOH	12	94	106	-0.773585	yes
extract	Luthobius sp.	11	N2	L4	octanol	H2O	6	53	59	-0.79661	yes
extract	Luthobius sp.	12	MY2079	L4	extract	DMSO	27	23	50	0.08	yes
extract	Luthobius sp.	12	MY2079	L4	extract	EtOH	33	34	67	-0.0149254	yes
extract	Luthobius sp.	12	MY2079	L4	extract	H2O	30	38	68	-0.117647	yes
extract	Luthobius sp.	12	MY2079	L4	isoamylalc	DMSO	41	14	55	0.490909	yes
extract	Luthobius sp.	12	MY2079	L4	isoamylalc	EtOH	50	15	65	0.538462	yes
extract	Luthobius sp.	12	MY2079	L4	isoamylalc	H2O	48	10	58	0.655172	yes
extract	Luthobius sp.	12	MY2079	L4	octanol	DMSO	16	41	57	-0.438596	yes
extract	Luthobius sp.	12	MY2079	L4	octanol	EtOH	5	35	40	-0.75	yes
extract	Luthobius sp.	12	MY2079	L4	octanol	H2O	10	39	49	-0.591837	yes
extract	Luthobius sp.	12	N2	L4	extract	DMSO	26	27	53	-0.0188679	yes
extract	Luthobius sp.	12	N2	L4	extract	EtOH	12	33	45	-0.466667	yes
extract	Luthobius sp.	12	N2	L4	extract	H2O	17	28	45	-0.244444	yes
extract	Luthobius sp.	12	N2	L4	isoamylalc	DMSO	60	5	65	0.846154	yes
extract	Luthobius sp.	12	N2	L4	isoamylalc	EtOH	40	4	44	0.818182	yes
extract	Luthobius sp.	12	N2	L4	isoamylalc	H2O	21	7	28	0.5	yes
extract	Luthobius sp.	12	N2	L4	octanol	DMSO	9	57	66	-0.727273	yes
extract	Luthobius sp.	12	N2	L4	octanol	EtOH	6	51	57	-0.789474	yes
extract	Luthobius sp.	12	N2	L4	octanol	H2O	5	37	42	-0.761905	yes
extract	Luthobius sp.	13	MY2079	L4	extract	DMSO	46	5	51	0.803922	yes
extract	Luthobius sp.	13	MY2079	L4	extract	EtOH	32	46	78	-0.179487	yes
extract	Luthobius sp.	13	MY2079	L4	extract	H2O	26	38	64	-0.1875	yes
extract	Luthobius sp.	13	MY2079	L4	isoamylalc	DMSO	69	11	80	0.725	yes
extract	Luthobius sp.	13	MY2079	L4	isoamylalc	EtOH	79	7	86	0.837209	yes
extract	Luthobius sp.	13	MY2079	L4	isoamylalc	H2O	69	13	82	0.682927	yes
extract	Luthobius sp.	13	MY2079	L4	octanol	DMSO	11	74	85	-0.741176	yes
extract	Luthobius sp.	13	MY2079	L4	octanol	EtOH	NA	NA	NA	NA	no	fungi on plate, exclude
extract	Luthobius sp.	13	MY2079	L4	octanol	H2O	3	56	59	-0.898305	yes
extract	Luthobius sp.	13	N2	L4	extract	DMSO	60	18	78	0.538462	yes
extract	Luthobius sp.	13	N2	L4	extract	EtOH	37	23	60	0.233333	yes
extract	Luthobius sp.	13	N2	L4	extract	H2O	24	26	50	-0.04	yes
extract	Luthobius sp.	13	N2	L4	isoamylalc	DMSO	47	6	53	0.773585	yes
extract	Luthobius sp.	13	N2	L4	isoamylalc	EtOH	73	26	99	0.474747	yes
extract	Luthobius sp.	13	N2	L4	isoamylalc	H2O	90	18	108	0.666667	yes
extract	Luthobius sp.	13	N2	L4	octanol	DMSO	9	45	54	-0.666667	yes
extract	Luthobius sp.	13	N2	L4	octanol	EtOH	5	85	90	-0.888889	yes
extract	Luthobius sp.	13	N2	L4	octanol	H2O	6	60	66	-0.818182	yes
extract	Luthobius sp.	14	MY2079	L4	extract	DMSO	27	21	48	0.125	yes
extract	Luthobius sp.	14	MY2079	L4	extract	EtOH	25	26	51	-0.0196078	yes
extract	Luthobius sp.	14	MY2079	L4	extract	H2O	26	15	41	0.268293	yes
extract	Luthobius sp.	14	MY2079	L4	isoamylalc	DMSO	38	5	43	0.767442	yes
extract	Luthobius sp.	14	MY2079	L4	isoamylalc	EtOH	29	4	33	0.757576	yes
extract	Luthobius sp.	14	MY2079	L4	isoamylalc	H2O	23	12	35	0.314286	yes
extract	Luthobius sp.	14	MY2079	L4	octanol	DMSO	3	52	55	-0.890909	yes
extract	Luthobius sp.	14	MY2079	L4	octanol	EtOH	4	33	37	-0.783784	yes
extract	Luthobius sp.	14	MY2079	L4	octanol	H2O	1	31	32	-0.9375	yes
extract	Luthobius sp.	14	N2	L4	extract	DMSO	24	23	47	0.0212766	yes
extract	Luthobius sp.	14	N2	L4	extract	EtOH	15	30	45	-0.333333	yes
extract	Luthobius sp.	14	N2	L4	extract	H2O	32	32	64	0	yes
extract	Luthobius sp.	14	N2	L4	isoamylalc	DMSO	37	4	41	0.804878	yes
extract	Luthobius sp.	14	N2	L4	isoamylalc	EtOH	43	6	49	0.755102	yes
extract	Luthobius sp.	14	N2	L4	isoamylalc	H2O	50	6	56	0.785714	yes
extract	Luthobius sp.	14	N2	L4	octanol	DMSO	5	45	50	-0.8	yes
extract	Luthobius sp.	14	N2	L4	octanol	EtOH	6	20	26	-0.538462	yes
extract	Luthobius sp.	14	N2	L4	octanol	H2O	2	22	24	-0.833333	yes
extract	Luthobius sp.	15	MY2079	L4	extract	DMSO	53	43	96	0.104167	yes
extract	Luthobius sp.	15	MY2079	L4	extract	EtOH	44	59	103	-0.145631	yes
extract	Luthobius sp.	15	MY2079	L4	extract	H2O	66	67	133	-0.0075188	yes
extract	Luthobius sp.	15	MY2079	L4	isoamylalc	DMSO	128	15	143	0.79021	yes
extract	Luthobius sp.	15	MY2079	L4	isoamylalc	EtOH	81	15	96	0.6875	yes
extract	Luthobius sp.	15	MY2079	L4	isoamylalc	H2O	76	18	94	0.617021	yes
extract	Luthobius sp.	15	MY2079	L4	octanol	DMSO	11	72	83	-0.73494	yes
extract	Luthobius sp.	15	MY2079	L4	octanol	EtOH	4	96	100	-0.92	yes
extract	Luthobius sp.	15	MY2079	L4	octanol	H2O	4	82	86	-0.906977	yes
extract	Luthobius sp.	15	N2	L4	extract	DMSO	44	36	80	0.1	yes
extract	Luthobius sp.	15	N2	L4	extract	EtOH	27	53	80	-0.325	yes
extract	Luthobius sp.	15	N2	L4	extract	H2O	42	36	78	0.0769231	yes
extract	Luthobius sp.	15	N2	L4	isoamylalc	DMSO	77	13	90	0.711111	yes
extract	Luthobius sp.	15	N2	L4	isoamylalc	EtOH	68	7	75	0.813333	yes
extract	Luthobius sp.	15	N2	L4	isoamylalc	H2O	69	7	76	0.815789	yes
extract	Luthobius sp.	15	N2	L4	octanol	DMSO	10	53	63	-0.68254	yes
extract	Luthobius sp.	15	N2	L4	octanol	EtOH	10	67	77	-0.74026	yes
extract	Luthobius sp.	15	N2	L4	octanol	H2O	13	68	81	-0.679012	yes

## Sheet: 2E Lithobius extract dauer
assay	invertebrate_species	rep	worm_strain	stage	choice_treat	solvent	count_treat	count_solvent	total	index	include	comments
extract	Lithobius sp.	1	MY2079	dauer	tissue	H2O	31	28	59	0.0508475	yes
extract	Lithobius sp.	1	MY2079	dauer	isoamylalc	EtOH	54	19	73	0.479452	yes
extract	Lithobius sp.	1	MY2079	dauer	isoamylalc	DMSO	62	14	76	0.631579	yes
extract	Lithobius sp.	1	MY2079	dauer	octanol	H2O	43	36	79	0.0886076	yes
extract	Lithobius sp.	1	MY2079	dauer	tissue	EtOH	40	39	79	0.0126582	yes
extract	Lithobius sp.	1	MY2079	dauer	tissue	DMSO	50	43	93	0.0752688	yes
extract	Lithobius sp.	1	MY2079	dauer	octanol	DMSO	44	50	94	-0.0638298	yes
extract	Lithobius sp.	1	MY2079	dauer	isoamylalc	H2O	98	13	111	0.765766	yes
extract	Lithobius sp.	1	MY2079	dauer	octanol	EtOH	52	67	119	-0.12605	yes
extract	Lithobius sp.	1	N2	dauer	isoamylalc	DMSO	8	5	13	0.230769	yes
extract	Lithobius sp.	1	N2	dauer	octanol	H2O	4	11	15	-0.466667	yes
extract	Lithobius sp.	1	N2	dauer	tissue	DMSO	7	8	15	-0.0666667	yes
extract	Lithobius sp.	1	N2	dauer	isoamylalc	H2O	11	6	17	0.294118	yes
extract	Lithobius sp.	1	N2	dauer	tissue	EtOH	6	11	17	-0.294118	yes
extract	Lithobius sp.	1	N2	dauer	octanol	DMSO	3	16	19	-0.684211	yes
extract	Lithobius sp.	1	N2	dauer	octanol	EtOH	8	11	19	-0.157895	yes
extract	Lithobius sp.	1	N2	dauer	tissue	H2O	12	9	21	0.142857	yes
extract	Lithobius sp.	1	N2	dauer	isoamylalc	EtOH	18	9	27	0.333333	yes
extract	Lithobius sp.	2	MY2079	dauer	tissue	H2O	39	29	68	0.147059	yes
extract	Lithobius sp.	2	MY2079	dauer	isoamylalc	EtOH	45	25	70	0.285714	yes
extract	Lithobius sp.	2	MY2079	dauer	tissue	DMSO	34	36	70	-0.0285714	yes
extract	Lithobius sp.	2	MY2079	dauer	isoamylalc	DMSO	62	11	73	0.69863	yes
extract	Lithobius sp.	2	MY2079	dauer	octanol	DMSO	44	30	74	0.189189	yes
extract	Lithobius sp.	2	MY2079	dauer	octanol	H2O	42	38	80	0.05	yes
extract	Lithobius sp.	2	MY2079	dauer	isoamylalc	H2O	77	12	89	0.730337	yes
extract	Lithobius sp.	2	MY2079	dauer	tissue	EtOH	43	50	93	-0.0752688	yes
extract	Lithobius sp.	2	MY2079	dauer	octanol	EtOH	46	56	102	-0.0980392	yes
extract	Lithobius sp.	2	N2	dauer	octanol	EtOH	1	3	4	NA	no	threshold not reached, exclude
extract	Lithobius sp.	2	N2	dauer	isoamylalc	H2O	3	2	5	NA	no	threshold not reached, exclude
extract	Lithobius sp.	2	N2	dauer	octanol	H2O	3	2	5	NA	no	threshold not reached, exclude
extract	Lithobius sp.	2	N2	dauer	tissue	EtOH	2	4	6	NA	no	threshold not reached, exclude
extract	Lithobius sp.	2	N2	dauer	octanol	DMSO	3	4	7	NA	no	threshold not reached, exclude
extract	Lithobius sp.	2	N2	dauer	tissue	H2O	2	7	9	NA	no	threshold not reached, exclude
extract	Lithobius sp.	2	N2	dauer	tissue	DMSO	7	2	9	NA	no	threshold not reached, exclude
extract	Lithobius sp.	2	N2	dauer	isoamylalc	EtOH	7	4	11	0.272727	yes
extract	Lithobius sp.	2	N2	dauer	isoamylalc	DMSO	14	1	15	0.866667	yes
extract	Lithobius sp.	3	MY2079	dauer	octanol	DMSO	44	40	84	0.047619	yes
extract	Lithobius sp.	3	MY2079	dauer	tissue	H2O	37	51	88	-0.159091	yes
extract	Lithobius sp.	3	MY2079	dauer	octanol	EtOH	45	52	97	-0.0721649	yes
extract	Lithobius sp.	3	MY2079	dauer	isoamylalc	EtOH	70	32	102	0.372549	yes
extract	Lithobius sp.	3	MY2079	dauer	isoamylalc	DMSO	82	21	103	0.592233	yes
extract	Lithobius sp.	3	MY2079	dauer	octanol	H2O	43	65	108	-0.203704	yes
extract	Lithobius sp.	3	MY2079	dauer	isoamylalc	H2O	92	26	118	0.559322	yes
extract	Lithobius sp.	3	MY2079	dauer	tissue	EtOH	58	70	128	-0.09375	yes
extract	Lithobius sp.	3	MY2079	dauer	tissue	DMSO	56	75	131	-0.145038	yes
extract	Lithobius sp.	3	N2	dauer	octanol	EtOH	1	4	5	NA	no	threshold not reached, exclude
extract	Lithobius sp.	3	N2	dauer	tissue	DMSO	2	3	5	NA	no	threshold not reached, exclude
extract	Lithobius sp.	3	N2	dauer	isoamylalc	EtOH	4	4	8	NA	no	threshold not reached, exclude
extract	Lithobius sp.	3	N2	dauer	isoamylalc	H2O	7	3	10	0.4	yes
extract	Lithobius sp.	3	N2	dauer	octanol	DMSO	5	5	10	0	yes
extract	Lithobius sp.	3	N2	dauer	tissue	EtOH	7	3	10	0.4	yes
extract	Lithobius sp.	3	N2	dauer	octanol	H2O	6	5	11	0.0909091	yes
extract	Lithobius sp.	3	N2	dauer	tissue	H2O	3	8	11	-0.454545	yes
extract	Lithobius sp.	3	N2	dauer	isoamylalc	DMSO	9	3	12	0.5	yes
extract	Lithobius sp.	4	MY2079	dauer	isoamylalc	EtOH	64	23	87	0.471264	yes
extract	Lithobius sp.	4	MY2079	dauer	tissue	H2O	43	69	112	-0.232143	yes
extract	Lithobius sp.	4	MY2079	dauer	tissue	DMSO	58	62	120	-0.0333333	yes
extract	Lithobius sp.	4	MY2079	dauer	tissue	EtOH	85	56	141	0.205674	yes
extract	Lithobius sp.	4	MY2079	dauer	octanol	EtOH	54	91	145	-0.255172	yes
extract	Lithobius sp.	4	MY2079	dauer	octanol	H2O	31	114	145	-0.572414	yes
extract	Lithobius sp.	4	MY2079	dauer	isoamylalc	H2O	119	60	179	0.329609	yes
extract	Lithobius sp.	4	MY2079	dauer	octanol	DMSO	62	123	185	-0.32973	yes
extract	Lithobius sp.	4	MY2079	dauer	isoamylalc	DMSO	147	65	212	0.386792	yes
extract	Lithobius sp.	4	N2	dauer	octanol	H2O	6	7	13	-0.0769231	yes
extract	Lithobius sp.	4	N2	dauer	octanol	DMSO	5	10	15	-0.333333	yes
extract	Lithobius sp.	4	N2	dauer	isoamylalc	H2O	11	6	17	0.294118	yes
extract	Lithobius sp.	4	N2	dauer	tissue	H2O	10	8	18	0.111111	yes
extract	Lithobius sp.	4	N2	dauer	tissue	EtOH	13	10	23	0.130435	yes
extract	Lithobius sp.	4	N2	dauer	octanol	EtOH	15	11	26	0.153846	yes
extract	Lithobius sp.	4	N2	dauer	tissue	DMSO	20	10	30	0.333333	yes
extract	Lithobius sp.	4	N2	dauer	isoamylalc	DMSO	27	11	38	0.421053	yes
extract	Lithobius sp.	4	N2	dauer	isoamylalc	EtOH	32	15	47	0.361702	yes
extract	Lithobius sp.	5	MY2079	dauer	octanol	EtOH	32	54	86	-0.255814	yes
extract	Lithobius sp.	5	MY2079	dauer	octanol	DMSO	37	57	94	-0.212766	yes
extract	Lithobius sp.	5	MY2079	dauer	octanol	H2O	40	60	100	-0.2	yes
extract	Lithobius sp.	5	MY2079	dauer	isoamylalc	DMSO	69	32	101	0.366337	yes
extract	Lithobius sp.	5	MY2079	dauer	isoamylalc	EtOH	81	36	117	0.384615	yes
extract	Lithobius sp.	5	MY2079	dauer	tissue	EtOH	57	68	125	-0.088	yes
extract	Lithobius sp.	5	MY2079	dauer	tissue	DMSO	66	64	130	0.0153846	yes
extract	Lithobius sp.	5	MY2079	dauer	tissue	H2O	84	77	161	0.0434783	yes
extract	Lithobius sp.	5	MY2079	dauer	isoamylalc	H2O	93	71	164	0.134146	yes
extract	Lithobius sp.	5	N2	dauer	octanol	DMSO	10	4	14	0.428571	yes
extract	Lithobius sp.	5	N2	dauer	octanol	H2O	13	1	14	0.857143	yes
extract	Lithobius sp.	5	N2	dauer	tissue	H2O	8	8	16	0	yes
extract	Lithobius sp.	5	N2	dauer	isoamylalc	EtOH	10	7	17	0.176471	yes
extract	Lithobius sp.	5	N2	dauer	tissue	DMSO	12	8	20	0.2	yes
extract	Lithobius sp.	5	N2	dauer	isoamylalc	DMSO	18	4	22	0.636364	yes
extract	Lithobius sp.	5	N2	dauer	isoamylalc	H2O	21	7	28	0.5	yes
extract	Lithobius sp.	5	N2	dauer	tissue	EtOH	19	16	35	0.0857143	yes
extract	Lithobius sp.	5	N2	dauer	octanol	EtOH	NA	NA	NA	NA	no	no data available, exclude
extract	Lithobius sp.	6	MY2079	dauer	octanol	H2O	35	44	79	-0.113924	yes
extract	Lithobius sp.	6	MY2079	dauer	tissue	EtOH	64	25	89	0.438202	yes
extract	Lithobius sp.	6	MY2079	dauer	octanol	EtOH	28	63	91	-0.384615	yes
extract	Lithobius sp.	6	MY2079	dauer	isoamylalc	EtOH	65	37	102	0.27451	yes
extract	Lithobius sp.	6	MY2079	dauer	isoamylalc	DMSO	62	45	107	0.158879	yes
extract	Lithobius sp.	6	MY2079	dauer	octanol	DMSO	47	61	108	-0.12963	yes
extract	Lithobius sp.	6	MY2079	dauer	tissue	H2O	85	25	110	0.545455	yes
extract	Lithobius sp.	6	MY2079	dauer	isoamylalc	H2O	68	44	112	0.214286	yes
extract	Lithobius sp.	6	MY2079	dauer	tissue	DMSO	96	37	133	0.443609	yes
extract	Lithobius sp.	6	N2	dauer	isoamylalc	EtOH	1	3	4	NA	no	threshold not reached, exclude
extract	Lithobius sp.	6	N2	dauer	octanol	H2O	5	5	10	0	yes
extract	Lithobius sp.	6	N2	dauer	isoamylalc	DMSO	7	7	14	0	yes
extract	Lithobius sp.	6	N2	dauer	isoamylalc	H2O	8	10	18	-0.111111	yes
extract	Lithobius sp.	6	N2	dauer	octanol	EtOH	12	12	24	0	yes
extract	Lithobius sp.	6	N2	dauer	octanol	DMSO	13	15	28	-0.0714286	yes
extract	Lithobius sp.	6	N2	dauer	tissue	H2O	20	11	31	0.290323	yes
extract	Lithobius sp.	6	N2	dauer	tissue	DMSO	22	13	35	0.257143	yes
extract	Lithobius sp.	6	N2	dauer	tissue	EtOH	25	28	53	-0.0566038	yes
extract	Lithobius sp.	7	MY2079	dauer	isoamylalc	EtOH	21	8	29	0.448276	yes
extract	Lithobius sp.	7	MY2079	dauer	octanol	EtOH	8	23	31	-0.483871	yes
extract	Lithobius sp.	7	MY2079	dauer	tissue	DMSO	15	25	40	-0.25	yes
extract	Lithobius sp.	7	MY2079	dauer	tissue	H2O	21	32	53	-0.207547	yes
extract	Lithobius sp.	7	MY2079	dauer	isoamylalc	H2O	46	11	57	0.614035	yes
extract	Lithobius sp.	7	MY2079	dauer	octanol	DMSO	30	30	60	0	yes
extract	Lithobius sp.	7	MY2079	dauer	tissue	EtOH	32	29	61	0.0491803	yes
extract	Lithobius sp.	7	MY2079	dauer	octanol	H2O	30	48	78	-0.230769	yes
extract	Lithobius sp.	7	MY2079	dauer	isoamylalc	DMSO	63	34	97	0.298969	yes
extract	Lithobius sp.	7	N2	dauer	tissue	EtOH	3	7	10	-0.4	yes
extract	Lithobius sp.	7	N2	dauer	isoamylalc	EtOH	7	5	12	0.166667	yes
extract	Lithobius sp.	7	N2	dauer	octanol	H2O	5	11	16	-0.375	yes
extract	Lithobius sp.	7	N2	dauer	octanol	DMSO	14	5	19	0.473684	yes
extract	Lithobius sp.	7	N2	dauer	tissue	H2O	14	7	21	0.333333	yes
extract	Lithobius sp.	7	N2	dauer	isoamylalc	DMSO	13	9	22	0.181818	yes
extract	Lithobius sp.	7	N2	dauer	octanol	EtOH	10	14	24	-0.166667	yes
extract	Lithobius sp.	7	N2	dauer	isoamylalc	H2O	17	8	25	0.36	yes
extract	Lithobius sp.	7	N2	dauer	tissue	DMSO	21	16	37	0.135135	yes
extract	Lithobius sp.	8	MY2079	dauer	octanol	H2O	19	33	52	-0.269231	yes
extract	Lithobius sp.	8	MY2079	dauer	isoamylalc	DMSO	27	26	53	0.0188679	yes
extract	Lithobius sp.	8	MY2079	dauer	octanol	DMSO	18	35	53	-0.320755	yes
extract	Lithobius sp.	8	MY2079	dauer	tissue	DMSO	34	20	54	0.259259	yes
extract	Lithobius sp.	8	MY2079	dauer	tissue	H2O	37	32	69	0.0724638	yes
extract	Lithobius sp.	8	MY2079	dauer	isoamylalc	H2O	47	26	73	0.287671	yes
extract	Lithobius sp.	8	MY2079	dauer	tissue	EtOH	48	47	95	0.0105263	yes
extract	Lithobius sp.	8	MY2079	dauer	octanol	EtOH	45	57	102	-0.117647	yes
extract	Lithobius sp.	8	MY2079	dauer	isoamylalc	EtOH	77	36	113	0.362832	yes
extract	Lithobius sp.	8	N2	dauer	tissue	EtOH	6	10	16	-0.25	yes
extract	Lithobius sp.	8	N2	dauer	isoamylalc	EtOH	12	6	18	0.333333	yes
extract	Lithobius sp.	8	N2	dauer	tissue	H2O	15	4	19	0.578947	yes
extract	Lithobius sp.	8	N2	dauer	isoamylalc	H2O	19	8	27	0.407407	yes
extract	Lithobius sp.	8	N2	dauer	octanol	H2O	15	13	28	0.0714286	yes
extract	Lithobius sp.	8	N2	dauer	octanol	DMSO	11	24	35	-0.371429	yes
extract	Lithobius sp.	8	N2	dauer	tissue	DMSO	14	29	43	-0.348837	yes
extract	Lithobius sp.	8	N2	dauer	isoamylalc	DMSO	31	14	45	0.377778	yes
extract	Lithobius sp.	8	N2	dauer	octanol	EtOH	20	39	59	-0.322034	yes
extract	Lithobius sp.	9	MY2079	dauer	isoamylalc	H2O	27	1	28	0.928571	yes
extract	Lithobius sp.	9	MY2079	dauer	tissue	H2O	27	11	38	0.421053	yes
extract	Lithobius sp.	9	MY2079	dauer	octanol	EtOH	16	25	41	-0.219512	yes
extract	Lithobius sp.	9	MY2079	dauer	tissue	EtOH	17	26	43	-0.209302	yes
extract	Lithobius sp.	9	MY2079	dauer	octanol	H2O	8	36	44	-0.636364	yes
extract	Lithobius sp.	9	MY2079	dauer	octanol	DMSO	20	30	50	-0.2	yes
extract	Lithobius sp.	9	MY2079	dauer	isoamylalc	DMSO	47	4	51	0.843137	yes
extract	Lithobius sp.	9	MY2079	dauer	tissue	DMSO	33	28	61	0.0819672	yes
extract	Lithobius sp.	9	MY2079	dauer	isoamylalc	EtOH	59	10	69	0.710145	yes
extract	Lithobius sp.	9	N2	dauer	tissue	EtOH	9	6	15	0.2	yes
extract	Lithobius sp.	9	N2	dauer	octanol	EtOH	10	12	22	-0.0909091	yes
extract	Lithobius sp.	9	N2	dauer	isoamylalc	DMSO	16	6	22	0.454545	yes
extract	Lithobius sp.	9	N2	dauer	tissue	DMSO	13	10	23	0.130435	yes
extract	Lithobius sp.	9	N2	dauer	tissue	H2O	11	14	25	-0.12	yes
extract	Lithobius sp.	9	N2	dauer	isoamylalc	EtOH	22	4	26	0.692308	yes
extract	Lithobius sp.	9	N2	dauer	octanol	DMSO	13	13	26	0	yes
extract	Lithobius sp.	9	N2	dauer	isoamylalc	H2O	24	5	29	0.655172	yes
extract	Lithobius sp.	9	N2	dauer	octanol	H2O	14	15	29	-0.0344828	yes
extract	Lithobius sp.	10	MY2079	dauer	tissue	H2O	27	24	51	0.0588235	yes
extract	Lithobius sp.	10	MY2079	dauer	octanol	DMSO	29	35	64	-0.09375	yes
extract	Lithobius sp.	10	MY2079	dauer	tissue	DMSO	21	48	69	-0.391304	yes
extract	Lithobius sp.	10	MY2079	dauer	octanol	EtOH	17	62	79	-0.56962	yes
extract	Lithobius sp.	10	MY2079	dauer	isoamylalc	EtOH	72	8	80	0.8	yes
extract	Lithobius sp.	10	MY2079	dauer	isoamylalc	DMSO	79	7	86	0.837209	yes
extract	Lithobius sp.	10	MY2079	dauer	isoamylalc	H2O	74	12	86	0.72093	yes
extract	Lithobius sp.	10	MY2079	dauer	octanol	H2O	38	55	93	-0.182796	yes
extract	Lithobius sp.	10	MY2079	dauer	tissue	EtOH	48	54	102	-0.0588235	yes
extract	Lithobius sp.	10	N2	dauer	octanol	EtOH	9	8	17	0.0588235	yes
extract	Lithobius sp.	10	N2	dauer	isoamylalc	DMSO	25	7	32	0.5625	yes
extract	Lithobius sp.	10	N2	dauer	isoamylalc	H2O	27	11	38	0.421053	yes
extract	Lithobius sp.	10	N2	dauer	octanol	H2O	15	25	40	-0.25	yes
extract	Lithobius sp.	10	N2	dauer	octanol	DMSO	16	25	41	-0.219512	yes
extract	Lithobius sp.	10	N2	dauer	tissue	EtOH	30	15	45	0.333333	yes
extract	Lithobius sp.	10	N2	dauer	tissue	DMSO	30	23	53	0.132075	yes
extract	Lithobius sp.	10	N2	dauer	tissue	H2O	31	28	59	0.0508475	yes
extract	Lithobius sp.	10	N2	dauer	isoamylalc	EtOH	50	15	65	0.538462	yes
extract	Lithobius sp.	11	MY2079	dauer	octanol	H2O	14	28	42	-0.333333	yes
extract	Lithobius sp.	11	MY2079	dauer	octanol	EtOH	19	32	51	-0.254902	yes
extract	Lithobius sp.	11	MY2079	dauer	octanol	DMSO	13	38	51	-0.490196	yes
extract	Lithobius sp.	11	MY2079	dauer	isoamylalc	DMSO	54	2	56	0.928571	yes
extract	Lithobius sp.	11	MY2079	dauer	tissue	EtOH	33	29	62	0.0645161	yes
extract	Lithobius sp.	11	MY2079	dauer	tissue	DMSO	39	39	78	0	yes
extract	Lithobius sp.	11	MY2079	dauer	isoamylalc	H2O	75	6	81	0.851852	yes
extract	Lithobius sp.	11	MY2079	dauer	tissue	H2O	45	50	95	-0.0526316	yes
extract	Lithobius sp.	11	MY2079	dauer	isoamylalc	EtOH	91	25	116	0.568966	yes
extract	Lithobius sp.	11	N2	dauer	tissue	DMSO	6	4	10	0.2	yes
extract	Lithobius sp.	11	N2	dauer	tissue	EtOH	4	7	11	-0.272727	yes
extract	Lithobius sp.	11	N2	dauer	octanol	EtOH	8	5	13	0.230769	yes
extract	Lithobius sp.	11	N2	dauer	isoamylalc	H2O	13	2	15	0.733333	yes
extract	Lithobius sp.	11	N2	dauer	octanol	H2O	7	16	23	-0.391304	yes
extract	Lithobius sp.	11	N2	dauer	isoamylalc	EtOH	16	8	24	0.333333	yes
extract	Lithobius sp.	11	N2	dauer	isoamylalc	DMSO	15	10	25	0.2	yes
extract	Lithobius sp.	11	N2	dauer	tissue	H2O	12	13	25	-0.04	yes
extract	Lithobius sp.	11	N2	dauer	octanol	DMSO	7	25	32	-0.5625	yes
extract	Lithobius sp.	12	MY2079	dauer	octanol	DMSO	15	17	32	-0.0625	yes
extract	Lithobius sp.	12	MY2079	dauer	octanol	EtOH	15	17	32	-0.0625	yes
extract	Lithobius sp.	12	MY2079	dauer	octanol	H2O	15	17	32	-0.0625	yes
extract	Lithobius sp.	12	MY2079	dauer	isoamylalc	DMSO	41	6	47	0.744681	yes
extract	Lithobius sp.	12	MY2079	dauer	isoamylalc	H2O	39	11	50	0.56	yes
extract	Lithobius sp.	12	MY2079	dauer	tissue	DMSO	21	30	51	-0.176471	yes
extract	Lithobius sp.	12	MY2079	dauer	tissue	EtOH	25	31	56	-0.107143	yes
extract	Lithobius sp.	12	MY2079	dauer	tissue	H2O	27	34	61	-0.114754	yes
extract	Lithobius sp.	12	MY2079	dauer	isoamylalc	EtOH	51	14	65	0.569231	yes
extract	Lithobius sp.	12	N2	dauer	octanol	DMSO	4	6	10	-0.2	yes
extract	Lithobius sp.	12	N2	dauer	tissue	EtOH	5	5	10	0	yes
extract	Lithobius sp.	12	N2	dauer	tissue	H2O	5	5	10	0	yes
extract	Lithobius sp.	12	N2	dauer	isoamylalc	H2O	5	5	10	0	yes
extract	Lithobius sp.	12	N2	dauer	isoamylalc	DMSO	4	7	11	-0.272727	yes
extract	Lithobius sp.	12	N2	dauer	octanol	EtOH	7	5	12	0.166667	yes
extract	Lithobius sp.	12	N2	dauer	octanol	H2O	6	6	12	0	yes
extract	Lithobius sp.	12	N2	dauer	tissue	DMSO	8	5	13	0.230769	yes
extract	Lithobius sp.	12	N2	dauer	isoamylalc	EtOH	15	2	17	0.764706	yes
extract	Lithobius sp.	13	MY2079	dauer	tissue	DMSO	16	12	28	0.142857	yes
extract	Lithobius sp.	13	MY2079	dauer	tissue	H2O	14	19	33	-0.151515	yes
extract	Lithobius sp.	13	MY2079	dauer	octanol	EtOH	8	37	45	-0.644444	yes
extract	Lithobius sp.	13	MY2079	dauer	tissue	EtOH	19	26	45	-0.155556	yes
extract	Lithobius sp.	13	MY2079	dauer	isoamylalc	DMSO	37	16	53	0.396226	yes
extract	Lithobius sp.	13	MY2079	dauer	isoamylalc	H2O	49	7	56	0.75	yes
extract	Lithobius sp.	13	MY2079	dauer	octanol	H2O	20	39	59	-0.322034	yes
extract	Lithobius sp.	13	MY2079	dauer	octanol	DMSO	45	38	83	0.0843373	yes
extract	Lithobius sp.	13	MY2079	dauer	isoamylalc	EtOH	66	23	89	0.483146	yes
extract	Lithobius sp.	13	N2	dauer	isoamylalc	H2O	4	4	8	NA	no	threshold not reached, exclude
extract	Lithobius sp.	13	N2	dauer	isoamylalc	DMSO	5	5	10	0	yes
extract	Lithobius sp.	13	N2	dauer	octanol	DMSO	4	8	12	-0.333333	yes
extract	Lithobius sp.	13	N2	dauer	isoamylalc	EtOH	9	3	12	0.5	yes
extract	Lithobius sp.	13	N2	dauer	octanol	EtOH	5	9	14	-0.285714	yes
extract	Lithobius sp.	13	N2	dauer	tissue	EtOH	6	9	15	-0.2	yes
extract	Lithobius sp.	13	N2	dauer	octanol	H2O	9	7	16	0.125	yes
extract	Lithobius sp.	13	N2	dauer	tissue	DMSO	9	9	18	0	yes
extract	Lithobius sp.	13	N2	dauer	tissue	H2O	12	11	23	0.0434783	yes
extract	Lithobius sp.	14	MY2079	dauer	octanol	DMSO	20	37	57	-0.298246	yes
extract	Lithobius sp.	14	MY2079	dauer	isoamylalc	DMSO	62	32	94	0.319149	yes
extract	Lithobius sp.	14	MY2079	dauer	tissue	DMSO	66	68	134	-0.0149254	yes
extract	Lithobius sp.	14	MY2079	dauer	octanol	EtOH	13	27	40	-0.35	yes
extract	Lithobius sp.	14	MY2079	dauer	isoamylalc	EtOH	60	32	92	0.304348	yes
extract	Lithobius sp.	14	MY2079	dauer	tissue	EtOH	47	59	106	-0.113208	yes
extract	Lithobius sp.	14	MY2079	dauer	octanol	H2O	29	30	59	-0.0169492	yes
extract	Lithobius sp.	14	MY2079	dauer	isoamylalc	H2O	80	49	129	0.24031	yes
extract	Lithobius sp.	14	MY2079	dauer	tissue	H2O	33	38	71	-0.0704225	yes
extract	Lithobius sp.	14	N2	dauer	octanol	DMSO	23	51	74	-0.378378	yes
extract	Lithobius sp.	14	N2	dauer	isoamylalc	DMSO	28	18	46	0.217391	yes
extract	Lithobius sp.	14	N2	dauer	tissue	DMSO	30	28	58	0.0344828	yes
extract	Lithobius sp.	14	N2	dauer	octanol	EtOH	15	25	40	-0.25	yes
extract	Lithobius sp.	14	N2	dauer	isoamylalc	EtOH	27	18	45	0.2	yes
extract	Lithobius sp.	14	N2	dauer	tissue	EtOH	17	14	31	0.0967742	yes
extract	Lithobius sp.	14	N2	dauer	octanol	H2O	20	28	48	-0.166667	yes
extract	Lithobius sp.	14	N2	dauer	isoamylalc	H2O	31	15	46	0.347826	yes
extract	Lithobius sp.	14	N2	dauer	tissue	H2O	24	26	50	-0.04	yes
extract	Lithobius sp.	15	MY2079	dauer	octanol	DMSO	44	97	141	-0.375887	yes
extract	Lithobius sp.	15	MY2079	dauer	isoamylalc	DMSO	101	69	170	0.188235	yes
extract	Lithobius sp.	15	MY2079	dauer	tissue	DMSO	46	43	89	0.0337079	yes
extract	Lithobius sp.	15	MY2079	dauer	octanol	EtOH	46	84	130	-0.292308	yes
extract	Lithobius sp.	15	MY2079	dauer	isoamylalc	EtOH	76	58	134	0.134328	yes
extract	Lithobius sp.	15	MY2079	dauer	tissue	EtOH	76	77	153	-0.00653595	yes
extract	Lithobius sp.	15	MY2079	dauer	octanol	H2O	57	134	191	-0.403141	yes
extract	Lithobius sp.	15	MY2079	dauer	isoamylalc	H2O	112	80	192	0.166667	yes
extract	Lithobius sp.	15	MY2079	dauer	tissue	H2O	80	99	179	-0.106145	yes
extract	Lithobius sp.	15	N2	dauer	octanol	DMSO	29	44	73	-0.205479	yes
extract	Lithobius sp.	15	N2	dauer	isoamylalc	DMSO	41	33	74	0.108108	yes
extract	Lithobius sp.	15	N2	dauer	tissue	DMSO	76	69	145	0.0482759	yes
extract	Lithobius sp.	15	N2	dauer	octanol	EtOH	28	55	83	-0.325301	yes
extract	Lithobius sp.	15	N2	dauer	isoamylalc	EtOH	61	44	105	0.161905	yes
extract	Lithobius sp.	15	N2	dauer	tissue	EtOH	67	72	139	-0.0359712	yes
extract	Lithobius sp.	15	N2	dauer	octanol	H2O	48	79	127	-0.244094	yes
extract	Lithobius sp.	15	N2	dauer	isoamylalc	H2O	72	42	114	0.263158	yes
extract	Lithobius sp.	15	N2	dauer	tissue	H2O	77	104	181	-0.149171	yes

## Sheet: 2F D. melanogaster extract L4
assay	invertebrate_species	rep	worm_strain	stage	choice_treat	solvent	count_treat	count_solvent	total	index	include
extract	Drosophila melanogaster	1	MY2079	L4	isoamylalc	H2O	78	25	103	0.514563	yes
extract	Drosophila melanogaster	1	MY2079	L4	isoamylalc	EtOH	48	10	58	0.655172	yes
extract	Drosophila melanogaster	1	MY2079	L4	isoamylalc	DMSO	49	14	63	0.555556	yes
extract	Drosophila melanogaster	1	MY2079	L4	octanol	H2O	25	55	80	-0.375	yes
extract	Drosophila melanogaster	1	MY2079	L4	octanol	EtOH	24	45	69	-0.304348	yes
extract	Drosophila melanogaster	1	MY2079	L4	octanol	DMSO	15	44	59	-0.491525	yes
extract	Drosophila melanogaster	1	MY2079	L4	extract	H2O	45	23	68	0.323529	yes
extract	Drosophila melanogaster	1	MY2079	L4	extract	EtOH	46	43	89	0.0337079	yes
extract	Drosophila melanogaster	1	MY2079	L4	extract	DMSO	29	44	73	-0.205479	yes
extract	Drosophila melanogaster	1	N2	L4	isoamylalc	H2O	54	20	74	0.459459	yes
extract	Drosophila melanogaster	1	N2	L4	isoamylalc	EtOH	59	12	71	0.661972	yes
extract	Drosophila melanogaster	1	N2	L4	isoamylalc	DMSO	50	12	62	0.612903	yes
extract	Drosophila melanogaster	1	N2	L4	octanol	H2O	11	40	51	-0.568627	yes
extract	Drosophila melanogaster	1	N2	L4	octanol	EtOH	21	37	58	-0.275862	yes
extract	Drosophila melanogaster	1	N2	L4	octanol	DMSO	17	47	64	-0.46875	yes
extract	Drosophila melanogaster	1	N2	L4	extract	H2O	29	28	57	0.0175439	yes
extract	Drosophila melanogaster	1	N2	L4	extract	EtOH	36	48	84	-0.142857	yes
extract	Drosophila melanogaster	1	N2	L4	extract	DMSO	29	32	61	-0.0491803	yes
extract	Drosophila melanogaster	2	MY2079	L4	isoamylalc	H2O	29	8	37	0.567568	yes
extract	Drosophila melanogaster	2	MY2079	L4	isoamylalc	EtOH	7	4	11	0.272727	yes
extract	Drosophila melanogaster	2	MY2079	L4	isoamylalc	DMSO	38	16	54	0.407407	yes
extract	Drosophila melanogaster	2	MY2079	L4	octanol	H2O	4	38	42	-0.809524	yes
extract	Drosophila melanogaster	2	MY2079	L4	octanol	EtOH	3	18	21	-0.714286	yes
extract	Drosophila melanogaster	2	MY2079	L4	octanol	DMSO	7	14	21	-0.333333	yes
extract	Drosophila melanogaster	2	MY2079	L4	extract	H2O	26	19	45	0.155556	yes
extract	Drosophila melanogaster	2	MY2079	L4	extract	EtOH	20	21	41	-0.0243902	yes
extract	Drosophila melanogaster	2	MY2079	L4	extract	DMSO	30	40	70	-0.142857	yes
extract	Drosophila melanogaster	2	N2	L4	isoamylalc	H2O	25	9	34	0.470588	yes
extract	Drosophila melanogaster	2	N2	L4	isoamylalc	EtOH	19	8	27	0.407407	yes
extract	Drosophila melanogaster	2	N2	L4	isoamylalc	DMSO	17	11	28	0.214286	yes
extract	Drosophila melanogaster	2	N2	L4	octanol	H2O	7	49	56	-0.75	yes
extract	Drosophila melanogaster	2	N2	L4	octanol	EtOH	5	25	30	-0.666667	yes
extract	Drosophila melanogaster	2	N2	L4	octanol	DMSO	2	29	31	-0.870968	yes
extract	Drosophila melanogaster	2	N2	L4	extract	H2O	33	34	67	-0.0149254	yes
extract	Drosophila melanogaster	2	N2	L4	extract	EtOH	16	28	44	-0.272727	yes
extract	Drosophila melanogaster	2	N2	L4	extract	DMSO	75	83	158	-0.0506329	yes
extract	Drosophila melanogaster	3	MY2079	L4	isoamylalc	H2O	52	36	88	0.181818	yes
extract	Drosophila melanogaster	3	MY2079	L4	isoamylalc	EtOH	45	28	73	0.232877	yes
extract	Drosophila melanogaster	3	MY2079	L4	isoamylalc	DMSO	60	23	83	0.445783	yes
extract	Drosophila melanogaster	3	MY2079	L4	octanol	H2O	31	38	69	-0.101449	yes
extract	Drosophila melanogaster	3	MY2079	L4	octanol	EtOH	27	67	94	-0.425532	yes
extract	Drosophila melanogaster	3	MY2079	L4	octanol	DMSO	23	87	110	-0.581818	yes
extract	Drosophila melanogaster	3	MY2079	L4	extract	H2O	52	43	95	0.0947368	yes
extract	Drosophila melanogaster	3	MY2079	L4	extract	EtOH	48	50	98	-0.0204082	yes
extract	Drosophila melanogaster	3	MY2079	L4	extract	DMSO	40	40	80	0	yes
extract	Drosophila melanogaster	3	N2	L4	isoamylalc	H2O	68	28	96	0.416667	yes
extract	Drosophila melanogaster	3	N2	L4	isoamylalc	EtOH	80	20	100	0.6	yes
extract	Drosophila melanogaster	3	N2	L4	isoamylalc	DMSO	12	10	22	0.0909091	yes
extract	Drosophila melanogaster	3	N2	L4	octanol	H2O	28	89	117	-0.521368	yes
extract	Drosophila melanogaster	3	N2	L4	octanol	EtOH	32	114	146	-0.561644	yes
extract	Drosophila melanogaster	3	N2	L4	octanol	DMSO	21	68	89	-0.52809	yes
extract	Drosophila melanogaster	3	N2	L4	extract	H2O	68	55	123	0.105691	yes
extract	Drosophila melanogaster	3	N2	L4	extract	EtOH	40	45	85	-0.0588235	yes
extract	Drosophila melanogaster	3	N2	L4	extract	DMSO	59	40	99	0.191919	yes
extract	Drosophila melanogaster	4	MY2079	L4	isoamylalc	H2O	44	5	49	0.795918	yes
extract	Drosophila melanogaster	4	MY2079	L4	isoamylalc	EtOH	75	11	86	0.744186	yes
extract	Drosophila melanogaster	4	MY2079	L4	isoamylalc	DMSO	73	12	85	0.717647	yes
extract	Drosophila melanogaster	4	MY2079	L4	octanol	H2O	1	36	37	-0.945946	yes
extract	Drosophila melanogaster	4	MY2079	L4	octanol	EtOH	0	45	45	-1	yes
extract	Drosophila melanogaster	4	MY2079	L4	octanol	DMSO	1	60	61	-0.967213	yes
extract	Drosophila melanogaster	4	MY2079	L4	extract	H2O	23	8	31	0.483871	yes
extract	Drosophila melanogaster	4	MY2079	L4	extract	EtOH	20	18	38	0.0526316	yes
extract	Drosophila melanogaster	4	MY2079	L4	extract	DMSO	14	14	28	0	yes
extract	Drosophila melanogaster	4	N2	L4	isoamylalc	H2O	59	8	67	0.761194	yes
extract	Drosophila melanogaster	4	N2	L4	isoamylalc	EtOH	79	9	88	0.795455	yes
extract	Drosophila melanogaster	4	N2	L4	isoamylalc	DMSO	78	20	98	0.591837	yes
extract	Drosophila melanogaster	4	N2	L4	octanol	H2O	3	31	34	-0.823529	yes
extract	Drosophila melanogaster	4	N2	L4	octanol	EtOH	3	24	27	-0.777778	yes
extract	Drosophila melanogaster	4	N2	L4	octanol	DMSO	2	47	49	-0.918367	yes
extract	Drosophila melanogaster	4	N2	L4	extract	H2O	22	18	40	0.1	yes
extract	Drosophila melanogaster	4	N2	L4	extract	EtOH	14	16	30	-0.0666667	yes
extract	Drosophila melanogaster	4	N2	L4	extract	DMSO	27	13	40	0.35	yes
extract	Drosophila melanogaster	5	MY2079	L4	isoamylalc	DMSO	29	13	42	0.380952	yes
extract	Drosophila melanogaster	5	MY2079	L4	isoamylalc	H2O	32	7	39	0.641026	yes
extract	Drosophila melanogaster	5	MY2079	L4	isoamylalc	EtOH	69	16	85	0.623529	yes
extract	Drosophila melanogaster	5	MY2079	L4	octanol	DMSO	1	56	57	-0.964912	yes
extract	Drosophila melanogaster	5	MY2079	L4	octanol	H2O	7	54	61	-0.770492	yes
extract	Drosophila melanogaster	5	MY2079	L4	octanol	EtOH	4	92	96	-0.916667	yes
extract	Drosophila melanogaster	5	MY2079	L4	extract	DMSO	11	24	35	-0.371429	yes
extract	Drosophila melanogaster	5	MY2079	L4	extract	H2O	19	27	46	-0.173913	yes
extract	Drosophila melanogaster	5	MY2079	L4	extract	EtOH	33	28	61	0.0819672	yes
extract	Drosophila melanogaster	5	N2	L4	isoamylalc	DMSO	17	13	30	0.133333	yes
extract	Drosophila melanogaster	5	N2	L4	isoamylalc	H2O	40	16	56	0.428571	yes
extract	Drosophila melanogaster	5	N2	L4	isoamylalc	EtOH	36	15	51	0.411765	yes
extract	Drosophila melanogaster	5	N2	L4	octanol	DMSO	10	32	42	-0.52381	yes
extract	Drosophila melanogaster	5	N2	L4	octanol	H2O	11	54	65	-0.661538	yes
extract	Drosophila melanogaster	5	N2	L4	octanol	EtOH	13	40	53	-0.509434	yes
extract	Drosophila melanogaster	5	N2	L4	extract	DMSO	22	29	51	-0.137255	yes
extract	Drosophila melanogaster	5	N2	L4	extract	H2O	24	22	46	0.0434783	yes
extract	Drosophila melanogaster	5	N2	L4	extract	EtOH	38	11	49	0.55102	yes
extract	Drosophila melanogaster	6	MY2079	L4	isoamylalc	DMSO	82	34	116	0.413793	yes
extract	Drosophila melanogaster	6	MY2079	L4	isoamylalc	H2O	79	37	116	0.362069	yes
extract	Drosophila melanogaster	6	MY2079	L4	isoamylalc	EtOH	76	37	113	0.345133	yes
extract	Drosophila melanogaster	6	MY2079	L4	octanol	DMSO	14	86	100	-0.72	yes
extract	Drosophila melanogaster	6	MY2079	L4	octanol	H2O	10	87	97	-0.793814	yes
extract	Drosophila melanogaster	6	MY2079	L4	octanol	EtOH	5	68	73	-0.863014	yes
extract	Drosophila melanogaster	6	MY2079	L4	extract	DMSO	30	42	72	-0.166667	yes
extract	Drosophila melanogaster	6	MY2079	L4	extract	H2O	47	66	113	-0.168142	yes
extract	Drosophila melanogaster	6	MY2079	L4	extract	EtOH	43	58	101	-0.148515	yes
extract	Drosophila melanogaster	6	N2	L4	isoamylalc	DMSO	36	5	41	0.756098	yes
extract	Drosophila melanogaster	6	N2	L4	isoamylalc	H2O	37	10	47	0.574468	yes
extract	Drosophila melanogaster	6	N2	L4	isoamylalc	EtOH	81	14	95	0.705263	yes
extract	Drosophila melanogaster	6	N2	L4	octanol	DMSO	6	55	61	-0.803279	yes
extract	Drosophila melanogaster	6	N2	L4	octanol	H2O	12	45	57	-0.578947	yes
extract	Drosophila melanogaster	6	N2	L4	octanol	EtOH	10	41	51	-0.607843	yes
extract	Drosophila melanogaster	6	N2	L4	extract	DMSO	27	30	57	-0.0526316	yes
extract	Drosophila melanogaster	6	N2	L4	extract	H2O	31	35	66	-0.0606061	yes
extract	Drosophila melanogaster	6	N2	L4	extract	EtOH	35	26	61	0.147541	yes
extract	Drosophila melanogaster	7	MY2079	L4	isoamylalc	EtOH	39	8	47	0.659574	yes
extract	Drosophila melanogaster	7	MY2079	L4	isoamylalc	H2O	37	14	51	0.45098	yes
extract	Drosophila melanogaster	7	MY2079	L4	isoamylalc	DMSO	20	8	28	0.428571	yes
extract	Drosophila melanogaster	7	MY2079	L4	octanol	EtOH	11	22	33	-0.333333	yes
extract	Drosophila melanogaster	7	MY2079	L4	octanol	H2O	1	38	39	-0.948718	yes
extract	Drosophila melanogaster	7	MY2079	L4	octanol	DMSO	3	43	46	-0.869565	yes
extract	Drosophila melanogaster	7	MY2079	L4	extract	EtOH	16	21	37	-0.135135	yes
extract	Drosophila melanogaster	7	MY2079	L4	extract	H2O	10	22	32	-0.375	yes
extract	Drosophila melanogaster	7	MY2079	L4	extract	DMSO	24	9	33	0.454545	yes
extract	Drosophila melanogaster	7	N2	L4	isoamylalc	EtOH	31	9	40	0.55	yes
extract	Drosophila melanogaster	7	N2	L4	isoamylalc	H2O	35	7	42	0.666667	yes
extract	Drosophila melanogaster	7	N2	L4	isoamylalc	DMSO	41	6	47	0.744681	yes
extract	Drosophila melanogaster	7	N2	L4	octanol	EtOH	8	18	26	-0.384615	yes
extract	Drosophila melanogaster	7	N2	L4	octanol	H2O	3	16	19	-0.684211	yes
extract	Drosophila melanogaster	7	N2	L4	octanol	DMSO	4	33	37	-0.783784	yes
extract	Drosophila melanogaster	7	N2	L4	extract	EtOH	30	23	53	0.132075	yes
extract	Drosophila melanogaster	7	N2	L4	extract	H2O	24	27	51	-0.0588235	yes
extract	Drosophila melanogaster	7	N2	L4	extract	DMSO	45	34	79	0.139241	yes
extract	Drosophila melanogaster	8	MY2079	L4	isoamylalc	EtOH	66	31	97	0.360825	yes
extract	Drosophila melanogaster	8	MY2079	L4	isoamylalc	H2O	77	48	125	0.232	yes
extract	Drosophila melanogaster	8	MY2079	L4	isoamylalc	DMSO	46	26	72	0.277778	yes
extract	Drosophila melanogaster	8	MY2079	L4	octanol	EtOH	15	89	104	-0.711538	yes
extract	Drosophila melanogaster	8	MY2079	L4	octanol	H2O	6	71	77	-0.844156	yes
extract	Drosophila melanogaster	8	MY2079	L4	octanol	DMSO	33	65	98	-0.326531	yes
extract	Drosophila melanogaster	8	MY2079	L4	extract	EtOH	65	69	134	-0.0298507	yes
extract	Drosophila melanogaster	8	MY2079	L4	extract	H2O	40	47	87	-0.0804598	yes
extract	Drosophila melanogaster	8	MY2079	L4	extract	DMSO	39	61	100	-0.22	yes
extract	Drosophila melanogaster	8	N2	L4	isoamylalc	EtOH	23	12	35	0.314286	yes
extract	Drosophila melanogaster	8	N2	L4	isoamylalc	H2O	25	7	32	0.5625	yes
extract	Drosophila melanogaster	8	N2	L4	isoamylalc	DMSO	19	14	33	0.151515	yes
extract	Drosophila melanogaster	8	N2	L4	octanol	EtOH	4	22	26	-0.692308	yes
extract	Drosophila melanogaster	8	N2	L4	octanol	H2O	4	6	10	-0.2	yes
extract	Drosophila melanogaster	8	N2	L4	octanol	DMSO	7	11	18	-0.222222	yes
extract	Drosophila melanogaster	8	N2	L4	extract	EtOH	16	13	29	0.103448	yes
extract	Drosophila melanogaster	8	N2	L4	extract	H2O	9	16	25	-0.28	yes
extract	Drosophila melanogaster	8	N2	L4	extract	DMSO	23	17	40	0.15	yes
extract	Drosophila melanogaster	9	MY2079	L4	isoamylalc	EtOH	51	39	90	0.133333	yes
extract	Drosophila melanogaster	9	MY2079	L4	isoamylalc	DMSO	61	30	91	0.340659	yes
extract	Drosophila melanogaster	9	MY2079	L4	isoamylalc	H2O	97	32	129	0.503876	yes
extract	Drosophila melanogaster	9	MY2079	L4	octanol	EtOH	25	58	83	-0.39759	yes
extract	Drosophila melanogaster	9	MY2079	L4	octanol	DMSO	38	32	70	0.0857143	yes
extract	Drosophila melanogaster	9	MY2079	L4	octanol	H2O	33	63	96	-0.3125	yes
extract	Drosophila melanogaster	9	MY2079	L4	extract	EtOH	29	36	65	-0.107692	yes
extract	Drosophila melanogaster	9	MY2079	L4	extract	DMSO	47	52	99	-0.0505051	yes
extract	Drosophila melanogaster	9	MY2079	L4	extract	H2O	37	52	89	-0.168539	yes
extract	Drosophila melanogaster	9	N2	L4	isoamylalc	EtOH	66	33	99	0.333333	yes
extract	Drosophila melanogaster	9	N2	L4	isoamylalc	DMSO	59	28	87	0.356322	yes
extract	Drosophila melanogaster	9	N2	L4	isoamylalc	H2O	118	29	147	0.605442	yes
extract	Drosophila melanogaster	9	N2	L4	octanol	EtOH	40	62	102	-0.215686	yes
extract	Drosophila melanogaster	9	N2	L4	octanol	DMSO	13	49	62	-0.580645	yes
extract	Drosophila melanogaster	9	N2	L4	octanol	H2O	16	47	63	-0.492063	yes
extract	Drosophila melanogaster	9	N2	L4	extract	EtOH	42	55	97	-0.134021	yes
extract	Drosophila melanogaster	9	N2	L4	extract	DMSO	52	43	95	0.0947368	yes
extract	Drosophila melanogaster	9	N2	L4	extract	H2O	41	39	80	0.025	yes
extract	Drosophila melanogaster	10	MY2079	L4	isoamylalc	EtOH	56	23	79	0.417722	yes
extract	Drosophila melanogaster	10	MY2079	L4	isoamylalc	DMSO	90	42	132	0.363636	yes
extract	Drosophila melanogaster	10	MY2079	L4	isoamylalc	H2O	84	36	120	0.4	yes
extract	Drosophila melanogaster	10	MY2079	L4	octanol	EtOH	37	67	104	-0.288462	yes
extract	Drosophila melanogaster	10	MY2079	L4	octanol	DMSO	13	69	82	-0.682927	yes
extract	Drosophila melanogaster	10	MY2079	L4	octanol	H2O	20	104	124	-0.677419	yes
extract	Drosophila melanogaster	10	MY2079	L4	extract	EtOH	50	65	115	-0.130435	yes
extract	Drosophila melanogaster	10	MY2079	L4	extract	DMSO	33	27	60	0.1	yes
extract	Drosophila melanogaster	10	MY2079	L4	extract	H2O	17	49	66	-0.484848	yes
extract	Drosophila melanogaster	10	N2	L4	isoamylalc	EtOH	33	9	42	0.571429	yes
extract	Drosophila melanogaster	10	N2	L4	isoamylalc	DMSO	26	11	37	0.405405	yes
extract	Drosophila melanogaster	10	N2	L4	isoamylalc	H2O	31	11	42	0.47619	yes
extract	Drosophila melanogaster	10	N2	L4	octanol	EtOH	4	29	33	-0.757576	yes
extract	Drosophila melanogaster	10	N2	L4	octanol	DMSO	9	46	55	-0.672727	yes
extract	Drosophila melanogaster	10	N2	L4	octanol	H2O	10	43	53	-0.622642	yes
extract	Drosophila melanogaster	10	N2	L4	extract	EtOH	30	30	60	0	yes
extract	Drosophila melanogaster	10	N2	L4	extract	DMSO	35	24	59	0.186441	yes
extract	Drosophila melanogaster	10	N2	L4	extract	H2O	25	17	42	0.190476	yes
extract	Drosophila melanogaster	11	MY2079	L4	isoamylalc	H2O	47	13	60	0.566667	yes
extract	Drosophila melanogaster	11	MY2079	L4	isoamylalc	EtOH	58	16	74	0.567568	yes
extract	Drosophila melanogaster	11	MY2079	L4	isoamylalc	DMSO	33	23	56	0.178571	yes
extract	Drosophila melanogaster	11	MY2079	L4	octanol	H2O	11	58	69	-0.681159	yes
extract	Drosophila melanogaster	11	MY2079	L4	octanol	EtOH	16	69	85	-0.623529	yes
extract	Drosophila melanogaster	11	MY2079	L4	octanol	DMSO	13	107	120	-0.783333	yes
extract	Drosophila melanogaster	11	MY2079	L4	extract	H2O	16	33	49	-0.346939	yes
extract	Drosophila melanogaster	11	MY2079	L4	extract	EtOH	46	34	80	0.15	yes
extract	Drosophila melanogaster	11	MY2079	L4	extract	DMSO	33	44	77	-0.142857	yes
extract	Drosophila melanogaster	11	N2	L4	isoamylalc	H2O	66	19	85	0.552941	yes
extract	Drosophila melanogaster	11	N2	L4	isoamylalc	EtOH	75	27	102	0.470588	yes
extract	Drosophila melanogaster	11	N2	L4	isoamylalc	DMSO	63	17	80	0.575	yes
extract	Drosophila melanogaster	11	N2	L4	octanol	H2O	6	43	49	-0.755102	yes
extract	Drosophila melanogaster	11	N2	L4	octanol	EtOH	5	70	75	-0.866667	yes
extract	Drosophila melanogaster	11	N2	L4	octanol	DMSO	6	96	102	-0.882353	yes
extract	Drosophila melanogaster	11	N2	L4	extract	H2O	38	35	73	0.0410959	yes
extract	Drosophila melanogaster	11	N2	L4	extract	EtOH	64	55	119	0.0756303	yes
extract	Drosophila melanogaster	11	N2	L4	extract	DMSO	52	37	89	0.168539	yes
extract	Drosophila melanogaster	12	MY2079	L4	isoamylalc	H2O	37	18	55	0.345455	yes
extract	Drosophila melanogaster	12	MY2079	L4	isoamylalc	EtOH	73	25	98	0.489796	yes
extract	Drosophila melanogaster	12	MY2079	L4	isoamylalc	DMSO	40	24	64	0.25	yes
extract	Drosophila melanogaster	12	MY2079	L4	octanol	H2O	9	60	69	-0.73913	yes
extract	Drosophila melanogaster	12	MY2079	L4	octanol	EtOH	28	80	108	-0.481481	yes
extract	Drosophila melanogaster	12	MY2079	L4	octanol	DMSO	1	73	74	-0.972973	yes
extract	Drosophila melanogaster	12	MY2079	L4	extract	H2O	55	57	112	-0.0178571	yes
extract	Drosophila melanogaster	12	MY2079	L4	extract	EtOH	47	73	120	-0.216667	yes
extract	Drosophila melanogaster	12	MY2079	L4	extract	DMSO	24	20	44	0.0909091	yes
extract	Drosophila melanogaster	12	N2	L4	isoamylalc	H2O	37	18	55	0.345455	yes
extract	Drosophila melanogaster	12	N2	L4	isoamylalc	EtOH	40	16	56	0.428571	yes
extract	Drosophila melanogaster	12	N2	L4	isoamylalc	DMSO	29	22	51	0.137255	yes
extract	Drosophila melanogaster	12	N2	L4	octanol	H2O	11	33	44	-0.5	yes
extract	Drosophila melanogaster	12	N2	L4	octanol	EtOH	8	62	70	-0.771429	yes
extract	Drosophila melanogaster	12	N2	L4	octanol	DMSO	6	51	57	-0.789474	yes
extract	Drosophila melanogaster	12	N2	L4	extract	H2O	27	27	54	0	yes
extract	Drosophila melanogaster	12	N2	L4	extract	EtOH	28	42	70	-0.2	yes
extract	Drosophila melanogaster	12	N2	L4	extract	DMSO	33	38	71	-0.0704225	yes

## Sheet: 2F D. melanogast. extract dauer
assay	invertebrate_species	rep	worm_strain	stage	choice_treat	solvent	count_treat	count_solvent	total	index	include	comments
extract	Drosophila melanogaster	1	MY2079	dauer	isoamylalc	DMSO	78	6	84	0.857143	yes
extract	Drosophila melanogaster	1	MY2079	dauer	isoamylalc	EtOH	72	18	90	0.6	yes
extract	Drosophila melanogaster	1	MY2079	dauer	isoamylalc	H2O	94	9	103	0.825243	yes
extract	Drosophila melanogaster	1	MY2079	dauer	octanol	DMSO	52	30	82	0.268293	yes
extract	Drosophila melanogaster	1	MY2079	dauer	octanol	EtOH	48	45	93	0.0322581	yes
extract	Drosophila melanogaster	1	MY2079	dauer	octanol	H2O	1	1	2	NA	no	threshold not reached, exclude
extract	Drosophila melanogaster	1	MY2079	dauer	tissue	DMSO	33	27	60	0.1	yes
extract	Drosophila melanogaster	1	MY2079	dauer	tissue	EtOH	31	39	70	-0.114286	yes
extract	Drosophila melanogaster	1	MY2079	dauer	tissue	H2O	40	46	86	-0.0697674	yes
extract	Drosophila melanogaster	1	N2	dauer	isoamylalc	DMSO	16	11	27	0.185185	yes
extract	Drosophila melanogaster	1	N2	dauer	isoamylalc	EtOH	17	7	24	0.416667	yes
extract	Drosophila melanogaster	1	N2	dauer	isoamylalc	H2O	17	6	23	0.478261	yes
extract	Drosophila melanogaster	1	N2	dauer	octanol	DMSO	10	7	17	0.176471	yes
extract	Drosophila melanogaster	1	N2	dauer	octanol	EtOH	16	16	32	0	yes
extract	Drosophila melanogaster	1	N2	dauer	octanol	H2O	14	10	24	0.166667	yes
extract	Drosophila melanogaster	1	N2	dauer	tissue	DMSO	11	5	16	0.375	yes
extract	Drosophila melanogaster	1	N2	dauer	tissue	EtOH	9	4	13	0.384615	yes
extract	Drosophila melanogaster	1	N2	dauer	tissue	H2O	13	5	18	0.444444	yes
extract	Drosophila melanogaster	2	MY2079	dauer	isoamylalc	DMSO	58	20	78	0.487179	yes
extract	Drosophila melanogaster	2	MY2079	dauer	isoamylalc	EtOH	65	26	91	0.428571	yes
extract	Drosophila melanogaster	2	MY2079	dauer	isoamylalc	H2O	36	20	56	0.285714	yes
extract	Drosophila melanogaster	2	MY2079	dauer	octanol	EtOH	59	51	110	0.0727273	yes
extract	Drosophila melanogaster	2	MY2079	dauer	octanol	EtOH	60	57	117	0.025641	yes
extract	Drosophila melanogaster	2	MY2079	dauer	octanol	H2O	63	84	147	-0.142857	yes
extract	Drosophila melanogaster	2	MY2079	dauer	tissue	DMSO	102	123	225	-0.0933333	yes
extract	Drosophila melanogaster	2	MY2079	dauer	tissue	EtOH	65	70	135	-0.037037	yes
extract	Drosophila melanogaster	2	MY2079	dauer	tissue	H2O	48	68	116	-0.172414	yes
extract	Drosophila melanogaster	2	N2	dauer	isoamylalc	DMSO	11	6	17	0.294118	yes
extract	Drosophila melanogaster	2	N2	dauer	isoamylalc	EtOH	9	6	15	0.2	yes
extract	Drosophila melanogaster	2	N2	dauer	isoamylalc	H2O	10	8	18	0.111111	yes
extract	Drosophila melanogaster	2	N2	dauer	octanol	DMSO	10	18	28	-0.285714	yes
extract	Drosophila melanogaster	2	N2	dauer	octanol	EtOH	17	19	36	-0.0555556	yes
extract	Drosophila melanogaster	2	N2	dauer	octanol	H2O	13	8	21	0.238095	yes
extract	Drosophila melanogaster	2	N2	dauer	tissue	DMSO	12	27	39	-0.384615	yes
extract	Drosophila melanogaster	2	N2	dauer	tissue	EtOH	13	26	39	-0.333333	yes
extract	Drosophila melanogaster	2	N2	dauer	tissue	H2O	14	13	27	0.037037	yes
extract	Drosophila melanogaster	3	MY2079	dauer	isoamylalc	DMSO	86	10	96	0.791667	yes
extract	Drosophila melanogaster	3	MY2079	dauer	isoamylalc	EtOH	68	18	86	0.581395	yes
extract	Drosophila melanogaster	3	MY2079	dauer	isoamylalc	H2O	78	8	86	0.813953	yes
extract	Drosophila melanogaster	3	MY2079	dauer	octanol	DMSO	41	36	77	0.0649351	yes
extract	Drosophila melanogaster	3	MY2079	dauer	octanol	EtOH	29	30	59	-0.0169492	yes
extract	Drosophila melanogaster	3	MY2079	dauer	octanol	H2O	28	53	81	-0.308642	yes
extract	Drosophila melanogaster	3	MY2079	dauer	tissue	DMSO	39	34	73	0.0684932	yes
extract	Drosophila melanogaster	3	MY2079	dauer	tissue	EtOH	31	28	59	0.0508475	yes
extract	Drosophila melanogaster	3	MY2079	dauer	tissue	H2O	27	24	51	0.0588235	yes
extract	Drosophila melanogaster	3	N2	dauer	isoamylalc	DMSO	14	12	26	0.0769231	yes
extract	Drosophila melanogaster	3	N2	dauer	isoamylalc	EtOH	18	13	31	0.16129	yes
extract	Drosophila melanogaster	3	N2	dauer	isoamylalc	H2O	10	8	18	0.111111	yes
extract	Drosophila melanogaster	3	N2	dauer	octanol	DMSO	8	9	17	-0.0588235	yes
extract	Drosophila melanogaster	3	N2	dauer	octanol	EtOH	7	11	18	-0.222222	yes
extract	Drosophila melanogaster	3	N2	dauer	octanol	H2O	10	8	18	0.111111	yes
extract	Drosophila melanogaster	3	N2	dauer	tissue	DMSO	5	13	18	-0.444444	yes
extract	Drosophila melanogaster	3	N2	dauer	tissue	EtOH	14	11	25	0.12	yes
extract	Drosophila melanogaster	3	N2	dauer	tissue	H2O	6	8	14	-0.142857	yes
extract	Drosophila melanogaster	4	MY2079	dauer	isoamylalc	DMSO	94	39	133	0.413534	yes
extract	Drosophila melanogaster	4	MY2079	dauer	isoamylalc	EtOH	101	47	148	0.364865	yes
extract	Drosophila melanogaster	4	MY2079	dauer	isoamylalc	H2O	77	47	124	0.241935	yes
extract	Drosophila melanogaster	4	MY2079	dauer	octanol	DMSO	63	88	151	-0.165563	yes
extract	Drosophila melanogaster	4	MY2079	dauer	octanol	EtOH	36	49	85	-0.152941	yes
extract	Drosophila melanogaster	4	MY2079	dauer	octanol	H2O	38	69	107	-0.28972	yes
extract	Drosophila melanogaster	4	MY2079	dauer	tissue	DMSO	67	79	146	-0.0821918	yes
extract	Drosophila melanogaster	4	MY2079	dauer	tissue	EtOH	55	69	124	-0.112903	yes
extract	Drosophila melanogaster	4	MY2079	dauer	tissue	H2O	93	108	201	-0.0746269	yes
extract	Drosophila melanogaster	4	N2	dauer	isoamylalc	DMSO	13	5	18	0.444444	yes
extract	Drosophila melanogaster	4	N2	dauer	isoamylalc	EtOH	7	7	14	0	yes
extract	Drosophila melanogaster	4	N2	dauer	isoamylalc	H2O	8	2	10	0.6	yes
extract	Drosophila melanogaster	4	N2	dauer	octanol	DMSO	4	9	13	-0.384615	yes
extract	Drosophila melanogaster	4	N2	dauer	octanol	EtOH	7	11	18	-0.222222	yes
extract	Drosophila melanogaster	4	N2	dauer	octanol	H2O	3	9	12	-0.5	yes
extract	Drosophila melanogaster	4	N2	dauer	tissue	DMSO	19	8	27	0.407407	yes
extract	Drosophila melanogaster	4	N2	dauer	tissue	EtOH	4	6	10	-0.2	yes
extract	Drosophila melanogaster	4	N2	dauer	tissue	H2O	9	4	13	0.384615	yes
extract	Drosophila melanogaster	5	MY2079	dauer	isoamylalc	DMSO	98	28	126	0.555556	yes
extract	Drosophila melanogaster	5	MY2079	dauer	isoamylalc	EtOH	77	50	127	0.212598	yes
extract	Drosophila melanogaster	5	MY2079	dauer	isoamylalc	H2O	114	43	157	0.452229	yes
extract	Drosophila melanogaster	5	MY2079	dauer	octanol	DMSO	60	73	133	-0.0977444	yes
extract	Drosophila melanogaster	5	MY2079	dauer	octanol	EtOH	32	39	71	-0.0985915	yes
extract	Drosophila melanogaster	5	MY2079	dauer	octanol	H2O	57	49	106	0.0754717	yes
extract	Drosophila melanogaster	5	MY2079	dauer	tissue	DMSO	65	77	142	-0.084507	yes
extract	Drosophila melanogaster	5	MY2079	dauer	tissue	EtOH	37	45	82	-0.097561	yes
extract	Drosophila melanogaster	5	MY2079	dauer	tissue	H2O	71	67	138	0.0289855	yes
extract	Drosophila melanogaster	5	N2	dauer	isoamylalc	DMSO	11	5	16	0.375	yes
extract	Drosophila melanogaster	5	N2	dauer	isoamylalc	EtOH	6	3	9	NA	no	threshold not reached, exclude
extract	Drosophila melanogaster	5	N2	dauer	isoamylalc	H2O	6	4	10	0.2	yes
extract	Drosophila melanogaster	5	N2	dauer	octanol	DMSO	1	5	6	NA	no	threshold not reached, exclude
extract	Drosophila melanogaster	5	N2	dauer	octanol	EtOH	0	2	2	NA	no	threshold not reached, exclude
extract	Drosophila melanogaster	5	N2	dauer	octanol	H2O	2	11	13	-0.692308	yes
extract	Drosophila melanogaster	5	N2	dauer	tissue	DMSO	13	7	20	0.3	yes
extract	Drosophila melanogaster	5	N2	dauer	tissue	EtOH	6	5	11	0.0909091	yes
extract	Drosophila melanogaster	5	N2	dauer	tissue	H2O	5	5	10	0	yes
extract	Drosophila melanogaster	6	MY2079	dauer	isoamylalc	DMSO	75	29	104	0.442308	yes
extract	Drosophila melanogaster	6	MY2079	dauer	isoamylalc	EtOH	56	29	85	0.317647	yes
extract	Drosophila melanogaster	6	MY2079	dauer	isoamylalc	H2O	71	21	92	0.543478	yes
extract	Drosophila melanogaster	6	MY2079	dauer	octanol	DMSO	44	84	128	-0.3125	yes
extract	Drosophila melanogaster	6	MY2079	dauer	octanol	EtOH	49	64	113	-0.132743	yes
extract	Drosophila melanogaster	6	MY2079	dauer	octanol	H2O	35	53	88	-0.204545	yes
extract	Drosophila melanogaster	6	MY2079	dauer	tissue	DMSO	36	41	77	-0.0649351	yes
extract	Drosophila melanogaster	6	MY2079	dauer	tissue	EtOH	44	39	83	0.060241	yes
extract	Drosophila melanogaster	6	MY2079	dauer	tissue	H2O	61	41	102	0.196078	yes
extract	Drosophila melanogaster	6	N2	dauer	isoamylalc	DMSO	20	24	44	-0.0909091	yes
extract	Drosophila melanogaster	6	N2	dauer	isoamylalc	EtOH	13	19	32	-0.1875	yes
extract	Drosophila melanogaster	6	N2	dauer	isoamylalc	H2O	11	8	19	0.157895	yes
extract	Drosophila melanogaster	6	N2	dauer	octanol	DMSO	34	23	57	0.192982	yes
extract	Drosophila melanogaster	6	N2	dauer	octanol	EtOH	14	8	22	0.272727	yes
extract	Drosophila melanogaster	6	N2	dauer	octanol	H2O	16	12	28	0.142857	yes
extract	Drosophila melanogaster	6	N2	dauer	tissue	DMSO	16	18	34	-0.0588235	yes
extract	Drosophila melanogaster	6	N2	dauer	tissue	EtOH	8	4	12	0.333333	yes
extract	Drosophila melanogaster	6	N2	dauer	tissue	H2O	4	9	13	-0.384615	yes
extract	Drosophila melanogaster	7	MY2079	dauer	isoamylalc	DMSO	112	27	139	0.611511	yes
extract	Drosophila melanogaster	7	MY2079	dauer	isoamylalc	EtOH	77	30	107	0.439252	yes
extract	Drosophila melanogaster	7	MY2079	dauer	isoamylalc	H2O	149	47	196	0.520408	yes
extract	Drosophila melanogaster	7	MY2079	dauer	octanol	DMSO	36	84	120	-0.4	yes
extract	Drosophila melanogaster	7	MY2079	dauer	octanol	EtOH	51	104	155	-0.341935	yes
extract	Drosophila melanogaster	7	MY2079	dauer	octanol	H2O	54	68	122	-0.114754	yes
extract	Drosophila melanogaster	7	MY2079	dauer	tissue	DMSO	58	51	109	0.0642202	yes
extract	Drosophila melanogaster	7	MY2079	dauer	tissue	EtOH	37	39	76	-0.0263158	yes
extract	Drosophila melanogaster	7	MY2079	dauer	tissue	H2O	42	44	86	-0.0232558	yes
extract	Drosophila melanogaster	7	N2	dauer	isoamylalc	DMSO	16	8	24	0.333333	yes
extract	Drosophila melanogaster	7	N2	dauer	isoamylalc	EtOH	13	5	18	0.444444	yes
extract	Drosophila melanogaster	7	N2	dauer	isoamylalc	H2O	9	11	20	-0.1	yes
extract	Drosophila melanogaster	7	N2	dauer	octanol	DMSO	6	22	28	-0.571429	yes
extract	Drosophila melanogaster	7	N2	dauer	octanol	EtOH	7	13	20	-0.3	yes
extract	Drosophila melanogaster	7	N2	dauer	octanol	H2O	17	13	30	0.133333	yes
extract	Drosophila melanogaster	7	N2	dauer	tissue	DMSO	12	7	19	0.263158	yes
extract	Drosophila melanogaster	7	N2	dauer	tissue	EtOH	12	9	21	0.142857	yes
extract	Drosophila melanogaster	7	N2	dauer	tissue	H2O	15	14	29	0.0344828	yes
extract	Drosophila melanogaster	8	MY2079	dauer	isoamylalc	DMSO	84	11	95	0.768421	yes
extract	Drosophila melanogaster	8	MY2079	dauer	isoamylalc	EtOH	100	24	124	0.612903	yes
extract	Drosophila melanogaster	8	MY2079	dauer	isoamylalc	H2O	112	21	133	0.684211	yes
extract	Drosophila melanogaster	8	MY2079	dauer	octanol	DMSO	55	70	125	-0.12	yes
extract	Drosophila melanogaster	8	MY2079	dauer	octanol	EtOH	22	47	69	-0.362319	yes
extract	Drosophila melanogaster	8	MY2079	dauer	octanol	H2O	29	37	66	-0.121212	yes
extract	Drosophila melanogaster	8	MY2079	dauer	tissue	DMSO	66	78	144	-0.0833333	yes
extract	Drosophila melanogaster	8	MY2079	dauer	tissue	EtOH	46	43	89	0.0337079	yes
extract	Drosophila melanogaster	8	MY2079	dauer	tissue	H2O	89	77	166	0.0722892	yes
extract	Drosophila melanogaster	8	N2	dauer	isoamylalc	DMSO	8	3	11	0.454545	yes
extract	Drosophila melanogaster	8	N2	dauer	isoamylalc	EtOH	20	10	30	0.333333	yes
extract	Drosophila melanogaster	8	N2	dauer	isoamylalc	H2O	8	3	11	0.454545	yes
extract	Drosophila melanogaster	8	N2	dauer	octanol	DMSO	10	16	26	-0.230769	yes
extract	Drosophila melanogaster	8	N2	dauer	octanol	EtOH	8	17	25	-0.36	yes
extract	Drosophila melanogaster	8	N2	dauer	octanol	H2O	9	15	24	-0.25	yes
extract	Drosophila melanogaster	8	N2	dauer	tissue	DMSO	6	8	14	-0.142857	yes
extract	Drosophila melanogaster	8	N2	dauer	tissue	EtOH	3	11	14	-0.571429	yes
extract	Drosophila melanogaster	8	N2	dauer	tissue	H2O	16	4	20	0.6	yes
extract	Drosophila melanogaster	9	MY2079	dauer	isoamylalc	DMSO	129	21	150	0.72	yes
extract	Drosophila melanogaster	9	MY2079	dauer	isoamylalc	EtOH	111	21	132	0.681818	yes
extract	Drosophila melanogaster	9	MY2079	dauer	isoamylalc	H2O	89	27	116	0.534483	yes
extract	Drosophila melanogaster	9	MY2079	dauer	octanol	DMSO	60	68	128	-0.0625	yes
extract	Drosophila melanogaster	9	MY2079	dauer	octanol	EtOH	14	33	47	-0.404255	yes
extract	Drosophila melanogaster	9	MY2079	dauer	octanol	H2O	49	74	123	-0.203252	yes
extract	Drosophila melanogaster	9	MY2079	dauer	tissue	DMSO	74	76	150	-0.0133333	yes
extract	Drosophila melanogaster	9	MY2079	dauer	tissue	EtOH	40	43	83	-0.0361446	yes
extract	Drosophila melanogaster	9	MY2079	dauer	tissue	H2O	70	59	129	0.0852713	yes
extract	Drosophila melanogaster	9	N2	dauer	isoamylalc	DMSO	11	10	21	0.047619	yes
extract	Drosophila melanogaster	9	N2	dauer	isoamylalc	EtOH	7	10	17	-0.176471	yes
extract	Drosophila melanogaster	9	N2	dauer	isoamylalc	H2O	10	5	15	0.333333	yes
extract	Drosophila melanogaster	9	N2	dauer	octanol	DMSO	9	15	24	-0.25	yes
extract	Drosophila melanogaster	9	N2	dauer	octanol	EtOH	12	6	18	0.333333	yes
extract	Drosophila melanogaster	9	N2	dauer	octanol	H2O	4	11	15	-0.466667	yes
extract	Drosophila melanogaster	9	N2	dauer	tissue	DMSO	12	12	24	0	yes
extract	Drosophila melanogaster	9	N2	dauer	tissue	EtOH	10	11	21	-0.047619	yes
extract	Drosophila melanogaster	9	N2	dauer	tissue	H2O	9	6	15	0.2	yes
extract	Drosophila melanogaster	10	MY2079	dauer	isoamylalc	DMSO	38	24	62	0.225806	yes
extract	Drosophila melanogaster	10	MY2079	dauer	isoamylalc	EtOH	47	20	67	0.402985	yes
extract	Drosophila melanogaster	10	MY2079	dauer	isoamylalc	H2O	43	14	57	0.508772	yes
extract	Drosophila melanogaster	10	MY2079	dauer	octanol	DMSO	13	42	55	-0.527273	yes
extract	Drosophila melanogaster	10	MY2079	dauer	octanol	EtOH	26	25	51	0.0196078	yes
extract	Drosophila melanogaster	10	MY2079	dauer	octanol	H2O	21	59	80	-0.475	yes
extract	Drosophila melanogaster	10	MY2079	dauer	tissue	DMSO	58	79	137	-0.153285	yes
extract	Drosophila melanogaster	10	MY2079	dauer	tissue	EtOH	31	33	64	-0.03125	yes
extract	Drosophila melanogaster	10	MY2079	dauer	tissue	H2O	73	97	170	-0.141176	yes
extract	Drosophila melanogaster	10	N2	dauer	isoamylalc	DMSO	13	8	21	0.238095	yes
extract	Drosophila melanogaster	10	N2	dauer	isoamylalc	EtOH	24	14	38	0.263158	yes
extract	Drosophila melanogaster	10	N2	dauer	isoamylalc	H2O	14	11	25	0.12	yes
extract	Drosophila melanogaster	10	N2	dauer	octanol	DMSO	5	11	16	-0.375	yes
extract	Drosophila melanogaster	10	N2	dauer	octanol	EtOH	1	10	11	-0.818182	yes
extract	Drosophila melanogaster	10	N2	dauer	octanol	H2O	15	19	34	-0.117647	yes
extract	Drosophila melanogaster	10	N2	dauer	tissue	DMSO	25	16	41	0.219512	yes
extract	Drosophila melanogaster	10	N2	dauer	tissue	EtOH	9	9	18	0	yes
extract	Drosophila melanogaster	10	N2	dauer	tissue	H2O	28	30	58	-0.0344828	yes
extract	Drosophila melanogaster	11	MY2079	dauer	isoamylalc	DMSO	122	26	148	0.648649	yes
extract	Drosophila melanogaster	11	MY2079	dauer	isoamylalc	EtOH	143	31	174	0.643678	yes
extract	Drosophila melanogaster	11	MY2079	dauer	isoamylalc	H2O	116	16	132	0.757576	yes
extract	Drosophila melanogaster	11	MY2079	dauer	octanol	DMSO	38	50	88	-0.136364	yes
extract	Drosophila melanogaster	11	MY2079	dauer	octanol	EtOH	43	56	99	-0.131313	yes
extract	Drosophila melanogaster	11	MY2079	dauer	octanol	H2O	47	58	105	-0.104762	yes
extract	Drosophila melanogaster	11	MY2079	dauer	tissue	DMSO	66	72	138	-0.0434783	yes
extract	Drosophila melanogaster	11	MY2079	dauer	tissue	EtOH	93	94	187	-0.00534759	yes
extract	Drosophila melanogaster	11	MY2079	dauer	tissue	H2O	166	140	306	0.0849673	yes
extract	Drosophila melanogaster	12	MY2079	dauer	isoamylalc	DMSO	72	20	92	0.565217	yes
extract	Drosophila melanogaster	12	MY2079	dauer	isoamylalc	EtOH	73	25	98	0.489796	yes
extract	Drosophila melanogaster	12	MY2079	dauer	isoamylalc	H2O	80	12	92	0.73913	yes
extract	Drosophila melanogaster	12	MY2079	dauer	octanol	DMSO	41	66	107	-0.233645	yes
extract	Drosophila melanogaster	12	MY2079	dauer	octanol	EtOH	23	56	79	-0.417722	yes
extract	Drosophila melanogaster	12	MY2079	dauer	octanol	H2O	15	46	61	-0.508197	yes
extract	Drosophila melanogaster	12	MY2079	dauer	tissue	DMSO	61	51	112	0.0892857	yes
extract	Drosophila melanogaster	12	MY2079	dauer	tissue	EtOH	50	33	83	0.204819	yes
extract	Drosophila melanogaster	12	MY2079	dauer	tissue	H2O	62	60	122	0.0163934	yes
