# Supplementary material for: The nematode Caenorhabditis elegans and diverse potential invertebrate vectors predominantly interact opportunistically
Source: Frontiers journal article supplement (doi:10.3389/fevo.2023.1069056), 2023-02-01
Supplement: Table_6.XLSX [file Table_6.XLSX]

## Sheet: 3A Arion sp. mucus L4
assay	invertebrate_species	rep	worm_strain	stage	choice_treat	count_treat	count_control	total	index	include
slug mucus	Arion sp.	1	MY2079	L4	empty vs empty	37	34	71	0.0422535	yes
slug mucus	Arion sp.	1	MY2079	L4	mucus vs empty	31	15	46	0.347826	yes
slug mucus	Arion sp.	1	N2	L4	empty vs empty	124	40	164	0.512195	yes
slug mucus	Arion sp.	1	N2	L4	mucus vs empty	86	95	181	-0.0497238	yes
slug mucus	Arion sp.	2	MY2079	L4	empty vs empty	28	18	46	0.217391	yes
slug mucus	Arion sp.	2	MY2079	L4	mucus vs empty	20	24	44	-0.0909091	yes
slug mucus	Arion sp.	2	N2	L4	empty vs empty	47	57	104	-0.0961538	yes
slug mucus	Arion sp.	2	N2	L4	mucus vs empty	43	48	91	-0.0549451	yes
slug mucus	Arion sp.	3	MY2079	L4	empty vs empty	28	86	114	-0.508772	yes
slug mucus	Arion sp.	3	MY2079	L4	mucus vs empty	45	53	98	-0.0816327	yes
slug mucus	Arion sp.	3	N2	L4	empty vs empty	95	90	185	0.027027	yes
slug mucus	Arion sp.	3	N2	L4	mucus vs empty	96	40	136	0.411765	yes
slug mucus	Arion sp.	4	MY2079	L4	empty vs empty	36	30	66	0.0909091	yes
slug mucus	Arion sp.	4	MY2079	L4	mucus vs empty	45	21	66	0.363636	yes
slug mucus	Arion sp.	4	N2	L4	empty vs empty	42	67	109	-0.229358	yes
slug mucus	Arion sp.	4	N2	L4	mucus vs empty	39	63	102	-0.235294	yes
slug mucus	Arion sp.	5	MY2079	L4	empty vs empty	11	11	22	0	yes
slug mucus	Arion sp.	5	MY2079	L4	mucus vs empty	22	6	28	0.571429	yes
slug mucus	Arion sp.	5	N2	L4	empty vs empty	25	28	53	-0.0566038	yes
slug mucus	Arion sp.	5	N2	L4	mucus vs empty	23	36	59	-0.220339	yes
slug mucus	Arion sp.	6	MY2079	L4	empty vs empty	30	24	54	0.111111	yes
slug mucus	Arion sp.	6	MY2079	L4	mucus vs empty	40	30	70	0.142857	yes
slug mucus	Arion sp.	6	N2	L4	empty vs empty	61	76	137	-0.109489	yes
slug mucus	Arion sp.	6	N2	L4	mucus vs empty	43	99	142	-0.394366	yes
slug mucus	Arion sp.	7	MY2079	L4	empty vs empty	15	15	30	0	yes
slug mucus	Arion sp.	7	MY2079	L4	mucus vs empty	8	18	26	-0.384615	yes
slug mucus	Arion sp.	7	N2	L4	empty vs empty	34	52	86	-0.209302	yes
slug mucus	Arion sp.	7	N2	L4	mucus vs empty	43	18	61	0.409836	yes
slug mucus	Arion sp.	8	MY2079	L4	empty vs empty	17	7	24	0.416667	yes
slug mucus	Arion sp.	8	MY2079	L4	mucus vs empty	11	27	38	-0.421053	yes
slug mucus	Arion sp.	8	N2	L4	empty vs empty	75	80	155	-0.0322581	yes
slug mucus	Arion sp.	8	N2	L4	mucus vs empty	54	51	105	0.0285714	yes
slug mucus	Arion sp.	9	MY2079	L4	empty vs empty	20	25	45	-0.111111	yes
slug mucus	Arion sp.	9	MY2079	L4	mucus vs empty	44	24	68	0.294118	yes
slug mucus	Arion sp.	9	N2	L4	empty vs empty	67	19	86	0.55814	yes
slug mucus	Arion sp.	9	N2	L4	mucus vs empty	55	42	97	0.134021	yes
slug mucus	Arion sp.	10	MY2079	L4	empty vs empty	10	24	34	-0.411765	yes
slug mucus	Arion sp.	10	MY2079	L4	mucus vs empty	25	35	60	-0.166667	yes
slug mucus	Arion sp.	10	N2	L4	empty vs empty	36	62	98	-0.265306	yes
slug mucus	Arion sp.	10	N2	L4	mucus vs empty	55	63	118	-0.0677966	yes
slug mucus	Arion sp.	11	MY2079	L4	empty vs empty	19	22	41	-0.0731707	yes
slug mucus	Arion sp.	11	MY2079	L4	mucus vs empty	18	26	44	-0.181818	yes
slug mucus	Arion sp.	11	N2	L4	empty vs empty	71	38	109	0.302752	yes
slug mucus	Arion sp.	11	N2	L4	mucus vs empty	43	39	82	0.0487805	yes

## Sheet: 3A Arion sp. mucus dauer
assay	invertebrate_species	choice_treat	rep	worm_strain	stage	count_treat	count_control	total	index	include
slug mucus direct	Arion sp.	empty vs empty	1	MY2079	dauer	22	38	60	-0.266667	yes
slug mucus direct	Arion sp.	mucus vs empty	1	MY2079	dauer	65	44	109	0.192661	yes
slug mucus direct	Arion sp.	empty vs empty	1	N2	dauer	29	34	63	-0.0793651	yes
slug mucus direct	Arion sp.	mucus vs empty	1	N2	dauer	18	14	32	0.125	yes
slug mucus direct	Arion sp.	empty vs empty	2	MY2079	dauer	25	73	98	-0.489796	yes
slug mucus direct	Arion sp.	mucus vs empty	2	MY2079	dauer	88	75	163	0.0797546	yes
slug mucus direct	Arion sp.	empty vs empty	2	N2	dauer	66	59	125	0.056	yes
slug mucus direct	Arion sp.	mucus vs empty	2	N2	dauer	41	42	83	-0.0120482	yes
slug mucus direct	Arion sp.	empty vs empty	3	MY2079	dauer	66	71	137	-0.0364963	yes
slug mucus direct	Arion sp.	mucus vs empty	3	MY2079	dauer	66	53	119	0.109244	yes
slug mucus direct	Arion sp.	empty vs empty	3	N2	dauer	30	27	57	0.0526316	yes
slug mucus direct	Arion sp.	mucus vs empty	3	N2	dauer	33	50	83	-0.204819	yes
slug mucus direct	Arion sp.	empty vs empty	4	MY2079	dauer	102	115	217	-0.0599078	yes
slug mucus direct	Arion sp.	mucus vs empty	4	MY2079	dauer	60	106	166	-0.277108	yes
slug mucus direct	Arion sp.	empty vs empty	4	N2	dauer	81	78	159	0.0188679	yes
slug mucus direct	Arion sp.	mucus vs empty	4	N2	dauer	72	31	103	0.398058	yes
slug mucus direct	Arion sp.	empty vs empty	5	MY2079	dauer	109	110	219	-0.00456621	yes
slug mucus direct	Arion sp.	mucus vs empty	5	MY2079	dauer	80	82	162	-0.0123457	yes
slug mucus direct	Arion sp.	empty vs empty	5	N2	dauer	94	107	201	-0.0646766	yes
slug mucus direct	Arion sp.	mucus vs empty	5	N2	dauer	65	84	149	-0.127517	yes
slug mucus direct	Arion sp.	empty vs empty	6	MY2079	dauer	68	52	120	0.133333	yes
slug mucus direct	Arion sp.	mucus vs empty	6	MY2079	dauer	92	65	157	0.171975	yes
slug mucus direct	Arion sp.	empty vs empty	6	N2	dauer	78	155	233	-0.330472	yes
slug mucus direct	Arion sp.	mucus vs empty	6	N2	dauer	104	80	184	0.130435	yes
slug mucus direct	Arion sp.	empty vs empty	7	MY2079	dauer	135	137	272	-0.00735294	yes
slug mucus direct	Arion sp.	mucus vs empty	7	MY2079	dauer	81	44	125	0.296	yes
slug mucus direct	Arion sp.	empty vs empty	7	N2	dauer	53	32	85	0.247059	yes
slug mucus direct	Arion sp.	mucus vs empty	7	N2	dauer	30	38	68	-0.117647	yes
slug mucus direct	Arion sp.	empty vs empty	8	MY2079	dauer	143	170	313	-0.086262	yes
slug mucus direct	Arion sp.	mucus vs empty	8	MY2079	dauer	160	214	374	-0.144385	yes
slug mucus direct	Arion sp.	empty vs empty	8	N2	dauer	128	46	174	0.471264	yes
slug mucus direct	Arion sp.	mucus vs empty	8	N2	dauer	113	76	189	0.195767	yes
slug mucus direct	Arion sp.	empty vs empty	9	MY2079	dauer	51	96	147	-0.306122	yes
slug mucus direct	Arion sp.	mucus vs empty	9	MY2079	dauer	93	103	196	-0.0510204	yes
slug mucus direct	Arion sp.	empty vs empty	9	N2	dauer	120	96	216	0.111111	yes
slug mucus direct	Arion sp.	mucus vs empty	9	N2	dauer	98	127	225	-0.128889	yes
slug mucus direct	Arion sp.	empty vs empty	10	MY2079	dauer	38	68	106	-0.283019	yes
slug mucus direct	Arion sp.	mucus vs empty	10	MY2079	dauer	55	59	114	-0.0350877	yes
slug mucus direct	Arion sp.	empty vs empty	10	N2	dauer	26	20	46	0.130435	yes
slug mucus direct	Arion sp.	mucus vs empty	10	N2	dauer	24	28	52	-0.0769231	yes
slug mucus direct	Arion sp.	empty vs empty	11	MY2079	dauer	107	138	245	-0.126531	yes
slug mucus direct	Arion sp.	mucus vs empty	11	MY2079	dauer	93	89	182	0.021978	yes
slug mucus direct	Arion sp.	empty vs empty	11	N2	dauer	116	57	173	0.34104	yes
slug mucus direct	Arion sp.	mucus vs empty	11	N2	dauer	142	75	217	0.308756	yes
slug mucus direct	Arion sp.	empty vs empty	12	MY2079	dauer	33	32	65	0.0153846	yes
slug mucus direct	Arion sp.	mucus vs empty	12	MY2079	dauer	53	67	120	-0.116667	yes
slug mucus direct	Arion sp.	empty vs empty	12	N2	dauer	43	57	100	-0.14	yes
slug mucus direct	Arion sp.	mucus vs empty	12	N2	dauer	47	90	137	-0.313869	yes
slug mucus direct	Arion sp.	empty vs empty	13	MY2079	dauer	71	79	150	-0.0533333	yes
slug mucus direct	Arion sp.	mucus vs empty	13	MY2079	dauer	49	105	154	-0.363636	yes
slug mucus direct	Arion sp.	empty vs empty	13	N2	dauer	47	24	71	0.323944	yes
slug mucus direct	Arion sp.	mucus vs empty	13	N2	dauer	59	15	74	0.594595	yes

## Sheet: 3B Arion sp. feces L4
assay	invertebrate_species	rep	worm_strain	stage	choice_treat	solvent	count_treat	count_control	total	index	include
slug feces	Arion sp.	1	MY2079	L4	feces	H2O	33	24	57	0.157895	yes
slug feces	Arion sp.	1	MY2079	L4	feces	EtOH	37	22	59	0.254237	yes
slug feces	Arion sp.	1	MY2079	L4	feces	DMSO	44	51	95	-0.0736842	yes
slug feces	Arion sp.	1	MY2079	L4	isoamylalc	DMSO	46	8	54	0.703704	yes
slug feces	Arion sp.	1	MY2079	L4	isoamylalc	EtOH	69	5	74	0.864865	yes
slug feces	Arion sp.	1	MY2079	L4	isoamylalc	H2O	79	10	89	0.775281	yes
slug feces	Arion sp.	1	MY2079	L4	octanol	H2O	22	65	87	-0.494253	yes
slug feces	Arion sp.	1	MY2079	L4	octanol	DMSO	16	81	97	-0.670103	yes
slug feces	Arion sp.	1	MY2079	L4	octanol	EtOH	39	64	103	-0.242718	yes
slug feces	Arion sp.	1	N2	L4	feces	DMSO	26	19	45	0.155556	yes
slug feces	Arion sp.	1	N2	L4	feces	EtOH	24	35	59	-0.186441	yes
slug feces	Arion sp.	1	N2	L4	feces	H2O	52	44	96	0.0833333	yes
slug feces	Arion sp.	1	N2	L4	isoamylalc	DMSO	60	11	71	0.690141	yes
slug feces	Arion sp.	1	N2	L4	isoamylalc	H2O	60	15	75	0.6	yes
slug feces	Arion sp.	1	N2	L4	isoamylalc	EtOH	73	12	85	0.717647	yes
slug feces	Arion sp.	1	N2	L4	octanol	DMSO	10	21	31	-0.354839	yes
slug feces	Arion sp.	1	N2	L4	octanol	EtOH	7	48	55	-0.745455	yes
slug feces	Arion sp.	1	N2	L4	octanol	H2O	20	42	62	-0.354839	yes
slug feces	Arion sp.	2	MY2079	L4	feces	DMSO	29	24	53	0.0943396	yes
slug feces	Arion sp.	2	MY2079	L4	feces	H2O	45	33	78	0.153846	yes
slug feces	Arion sp.	2	MY2079	L4	feces	EtOH	50	49	99	0.010101	yes
slug feces	Arion sp.	2	MY2079	L4	isoamylalc	EtOH	41	14	55	0.490909	yes
slug feces	Arion sp.	2	MY2079	L4	isoamylalc	H2O	71	13	84	0.690476	yes
slug feces	Arion sp.	2	MY2079	L4	isoamylalc	DMSO	70	21	91	0.538462	yes
slug feces	Arion sp.	2	MY2079	L4	octanol	EtOH	14	47	61	-0.540984	yes
slug feces	Arion sp.	2	MY2079	L4	octanol	H2O	21	44	65	-0.353846	yes
slug feces	Arion sp.	2	MY2079	L4	octanol	DMSO	16	60	76	-0.578947	yes
slug feces	Arion sp.	2	N2	L4	feces	EtOH	28	27	55	0.0181818	yes
slug feces	Arion sp.	2	N2	L4	feces	DMSO	41	23	64	0.28125	yes
slug feces	Arion sp.	2	N2	L4	feces	H2O	27	43	70	-0.228571	yes
slug feces	Arion sp.	2	N2	L4	isoamylalc	DMSO	58	7	65	0.784615	yes
slug feces	Arion sp.	2	N2	L4	isoamylalc	EtOH	78	11	89	0.752809	yes
slug feces	Arion sp.	2	N2	L4	isoamylalc	H2O	84	9	93	0.806452	yes
slug feces	Arion sp.	2	N2	L4	octanol	EtOH	6	27	33	-0.636364	yes
slug feces	Arion sp.	2	N2	L4	octanol	H2O	10	42	52	-0.615385	yes
slug feces	Arion sp.	2	N2	L4	octanol	DMSO	9	59	68	-0.735294	yes
slug feces	Arion sp.	3	MY2079	L4	feces	EtOH	24	34	58	-0.172414	yes
slug feces	Arion sp.	3	MY2079	L4	feces	DMSO	40	40	80	0	yes
slug feces	Arion sp.	3	MY2079	L4	feces	H2O	43	43	86	0	yes
slug feces	Arion sp.	3	MY2079	L4	isoamylalc	EtOH	60	5	65	0.846154	yes
slug feces	Arion sp.	3	MY2079	L4	isoamylalc	H2O	61	6	67	0.820896	yes
slug feces	Arion sp.	3	MY2079	L4	isoamylalc	DMSO	56	18	74	0.513514	yes
slug feces	Arion sp.	3	MY2079	L4	octanol	DMSO	5	58	63	-0.84127	yes
slug feces	Arion sp.	3	MY2079	L4	octanol	EtOH	6	65	71	-0.830986	yes
slug feces	Arion sp.	3	MY2079	L4	octanol	H2O	8	82	90	-0.822222	yes
slug feces	Arion sp.	3	N2	L4	feces	DMSO	18	32	50	-0.28	yes
slug feces	Arion sp.	3	N2	L4	feces	H2O	30	23	53	0.132075	yes
slug feces	Arion sp.	3	N2	L4	feces	EtOH	21	34	55	-0.236364	yes
slug feces	Arion sp.	3	N2	L4	isoamylalc	DMSO	30	7	37	0.621622	yes
slug feces	Arion sp.	3	N2	L4	isoamylalc	EtOH	28	15	43	0.302326	yes
slug feces	Arion sp.	3	N2	L4	isoamylalc	H2O	51	18	69	0.478261	yes
slug feces	Arion sp.	3	N2	L4	octanol	EtOH	4	35	39	-0.794872	yes
slug feces	Arion sp.	3	N2	L4	octanol	H2O	3	50	53	-0.886792	yes
slug feces	Arion sp.	3	N2	L4	octanol	DMSO	5	48	53	-0.811321	yes
slug feces	Arion sp.	4	MY2079	L4	feces	H2O	18	21	39	-0.0769231	yes
slug feces	Arion sp.	4	MY2079	L4	feces	DMSO	26	15	41	0.268293	yes
slug feces	Arion sp.	4	MY2079	L4	feces	EtOH	29	33	62	-0.0645161	yes
slug feces	Arion sp.	4	MY2079	L4	isoamylalc	EtOH	42	5	47	0.787234	yes
slug feces	Arion sp.	4	MY2079	L4	isoamylalc	H2O	42	11	53	0.584906	yes
slug feces	Arion sp.	4	MY2079	L4	isoamylalc	DMSO	39	15	54	0.444444	yes
slug feces	Arion sp.	4	MY2079	L4	octanol	DMSO	1	33	34	-0.941176	yes
slug feces	Arion sp.	4	MY2079	L4	octanol	EtOH	3	41	44	-0.863636	yes
slug feces	Arion sp.	4	MY2079	L4	octanol	H2O	2	45	47	-0.914894	yes
slug feces	Arion sp.	4	N2	L4	feces	EtOH	8	9	17	-0.0588235	yes
slug feces	Arion sp.	4	N2	L4	feces	H2O	11	27	38	-0.421053	yes
slug feces	Arion sp.	4	N2	L4	feces	DMSO	24	15	39	0.230769	yes
slug feces	Arion sp.	4	N2	L4	isoamylalc	EtOH	40	6	46	0.73913	yes
slug feces	Arion sp.	4	N2	L4	isoamylalc	DMSO	38	10	48	0.583333	yes
slug feces	Arion sp.	4	N2	L4	isoamylalc	H2O	43	6	49	0.755102	yes
slug feces	Arion sp.	4	N2	L4	octanol	H2O	5	24	29	-0.655172	yes
slug feces	Arion sp.	4	N2	L4	octanol	DMSO	4	27	31	-0.741935	yes
slug feces	Arion sp.	4	N2	L4	octanol	EtOH	4	27	31	-0.741935	yes
slug feces	Arion sp.	5	MY2079	L4	feces	DMSO	36	34	70	0.0285714	yes
slug feces	Arion sp.	5	MY2079	L4	feces	H2O	57	44	101	0.128713	yes
slug feces	Arion sp.	5	MY2079	L4	feces	EtOH	51	55	106	-0.0377358	yes
slug feces	Arion sp.	5	MY2079	L4	isoamylalc	H2O	65	10	75	0.733333	yes
slug feces	Arion sp.	5	MY2079	L4	isoamylalc	DMSO	54	26	80	0.35	yes
slug feces	Arion sp.	5	MY2079	L4	isoamylalc	H2O	63	19	82	0.536585	yes
slug feces	Arion sp.	5	MY2079	L4	octanol	H2O	15	58	73	-0.589041	yes
slug feces	Arion sp.	5	MY2079	L4	octanol	DMSO	1	89	90	-0.977778	yes
slug feces	Arion sp.	5	MY2079	L4	octanol	EtOH	20	96	116	-0.655172	yes
slug feces	Arion sp.	5	N2	L4	feces	H2O	21	19	40	0.05	yes
slug feces	Arion sp.	5	N2	L4	feces	EtOH	27	31	58	-0.0689655	yes
slug feces	Arion sp.	5	N2	L4	feces	DMSO	31	42	73	-0.150685	yes
slug feces	Arion sp.	5	N2	L4	isoamylalc	DMSO	23	11	34	0.352941	yes
slug feces	Arion sp.	5	N2	L4	isoamylalc	EtOH	36	11	47	0.531915	yes
slug feces	Arion sp.	5	N2	L4	isoamylalc	H2O	37	13	50	0.48	yes
slug feces	Arion sp.	5	N2	L4	octanol	DMSO	7	13	20	-0.3	yes
slug feces	Arion sp.	5	N2	L4	octanol	H2O	8	24	32	-0.5	yes
slug feces	Arion sp.	5	N2	L4	octanol	EtOH	7	50	57	-0.754386	yes
slug feces	Arion sp.	6	MY2079	L4	feces	H2O	36	24	60	0.2	yes
slug feces	Arion sp.	6	MY2079	L4	feces	EtOH	28	36	64	-0.125	yes
slug feces	Arion sp.	6	MY2079	L4	feces	DMSO	37	36	73	0.0136986	yes
slug feces	Arion sp.	6	MY2079	L4	isoamylalc	DMSO	50	14	64	0.5625	yes
slug feces	Arion sp.	6	MY2079	L4	isoamylalc	EtOH	60	4	64	0.875	yes
slug feces	Arion sp.	6	MY2079	L4	isoamylalc	H2O	71	11	82	0.731707	yes
slug feces	Arion sp.	6	MY2079	L4	octanol	DMSO	21	39	60	-0.3	yes
slug feces	Arion sp.	6	MY2079	L4	octanol	EtOH	11	61	72	-0.694444	yes
slug feces	Arion sp.	6	MY2079	L4	octanol	H2O	7	86	93	-0.849462	yes
slug feces	Arion sp.	6	N2	L4	feces	DMSO	15	24	39	-0.230769	yes
slug feces	Arion sp.	6	N2	L4	feces	EtOH	18	27	45	-0.2	yes
slug feces	Arion sp.	6	N2	L4	feces	H2O	47	20	67	0.402985	yes
slug feces	Arion sp.	6	N2	L4	isoamylalc	DMSO	60	2	62	0.935484	yes
slug feces	Arion sp.	6	N2	L4	isoamylalc	H2O	63	2	65	0.938462	yes
slug feces	Arion sp.	6	N2	L4	isoamylalc	EtOH	62	5	67	0.850746	yes
slug feces	Arion sp.	6	N2	L4	octanol	DMSO	7	35	42	-0.666667	yes
slug feces	Arion sp.	6	N2	L4	octanol	EtOH	3	48	51	-0.882353	yes
slug feces	Arion sp.	6	N2	L4	octanol	H2O	10	44	54	-0.62963	yes
slug feces	Arion sp.	7	MY2079	L4	feces	EtOH	15	29	44	-0.318182	yes
slug feces	Arion sp.	7	MY2079	L4	feces	DMSO	20	30	50	-0.2	yes
slug feces	Arion sp.	7	MY2079	L4	feces	H2O	20	33	53	-0.245283	yes
slug feces	Arion sp.	7	MY2079	L4	isoamylalc	EtOH	40	17	57	0.403509	yes
slug feces	Arion sp.	7	MY2079	L4	isoamylalc	DMSO	70	22	92	0.521739	yes
slug feces	Arion sp.	7	MY2079	L4	isoamylalc	H2O	44	13	57	0.54386	yes
slug feces	Arion sp.	7	MY2079	L4	octanol	EtOH	11	50	61	-0.639344	yes
slug feces	Arion sp.	7	MY2079	L4	octanol	DMSO	34	70	104	-0.346154	yes
slug feces	Arion sp.	7	MY2079	L4	octanol	H2O	24	81	105	-0.542857	yes
slug feces	Arion sp.	7	N2	L4	feces	EtOH	17	18	35	-0.0285714	yes
slug feces	Arion sp.	7	N2	L4	feces	DMSO	34	27	61	0.114754	yes
slug feces	Arion sp.	7	N2	L4	feces	H2O	25	28	53	-0.0566038	yes
slug feces	Arion sp.	7	N2	L4	isoamylalc	EtOH	59	14	73	0.616438	yes
slug feces	Arion sp.	7	N2	L4	isoamylalc	DMSO	27	19	46	0.173913	yes
slug feces	Arion sp.	7	N2	L4	isoamylalc	H2O	51	2	53	0.924528	yes
slug feces	Arion sp.	7	N2	L4	octanol	EtOH	12	37	49	-0.510204	yes
slug feces	Arion sp.	7	N2	L4	octanol	DMSO	13	68	81	-0.679012	yes
slug feces	Arion sp.	7	N2	L4	octanol	H2O	4	50	54	-0.851852	yes
slug feces	Arion sp.	8	MY2079	L4	feces	EtOH	43	33	76	0.131579	yes
slug feces	Arion sp.	8	MY2079	L4	feces	DMSO	40	26	66	0.212121	yes
slug feces	Arion sp.	8	MY2079	L4	feces	H2O	32	38	70	-0.0857143	yes
slug feces	Arion sp.	8	MY2079	L4	isoamylalc	EtOH	60	10	70	0.714286	yes
slug feces	Arion sp.	8	MY2079	L4	isoamylalc	DMSO	56	7	63	0.777778	yes
slug feces	Arion sp.	8	MY2079	L4	isoamylalc	H2O	52	9	61	0.704918	yes
slug feces	Arion sp.	8	MY2079	L4	octanol	EtOH	16	51	67	-0.522388	yes
slug feces	Arion sp.	8	MY2079	L4	octanol	DMSO	30	57	87	-0.310345	yes
slug feces	Arion sp.	8	MY2079	L4	octanol	H2O	3	45	48	-0.875	yes
slug feces	Arion sp.	8	N2	L4	feces	EtOH	33	37	70	-0.0571429	yes
slug feces	Arion sp.	8	N2	L4	feces	DMSO	26	34	60	-0.133333	yes
slug feces	Arion sp.	8	N2	L4	feces	H2O	25	25	50	0	yes
slug feces	Arion sp.	8	N2	L4	isoamylalc	EtOH	51	15	66	0.545455	yes
slug feces	Arion sp.	8	N2	L4	isoamylalc	DMSO	58	4	62	0.870968	yes
slug feces	Arion sp.	8	N2	L4	isoamylalc	H2O	62	9	71	0.746479	yes
slug feces	Arion sp.	8	N2	L4	octanol	EtOH	6	28	34	-0.647059	yes
slug feces	Arion sp.	8	N2	L4	octanol	DMSO	16	23	39	-0.179487	yes
slug feces	Arion sp.	8	N2	L4	octanol	H2O	15	37	52	-0.423077	yes
slug feces	Arion sp.	9	MY2079	L4	feces	EtOH	18	38	56	-0.357143	yes
slug feces	Arion sp.	9	MY2079	L4	feces	DMSO	35	35	70	0	yes
slug feces	Arion sp.	9	MY2079	L4	feces	H2O	33	25	58	0.137931	yes
slug feces	Arion sp.	9	MY2079	L4	isoamylalc	EtOH	46	7	53	0.735849	yes
slug feces	Arion sp.	9	MY2079	L4	isoamylalc	DMSO	48	6	54	0.777778	yes
slug feces	Arion sp.	9	MY2079	L4	isoamylalc	H2O	31	9	40	0.55	yes
slug feces	Arion sp.	9	MY2079	L4	octanol	EtOH	8	30	38	-0.578947	yes
slug feces	Arion sp.	9	MY2079	L4	octanol	DMSO	4	38	42	-0.809524	yes
slug feces	Arion sp.	9	MY2079	L4	octanol	H2O	0	30	30	-1	yes
slug feces	Arion sp.	9	N2	L4	feces	EtOH	23	17	40	0.15	yes
slug feces	Arion sp.	9	N2	L4	feces	DMSO	34	26	60	0.133333	yes
slug feces	Arion sp.	9	N2	L4	feces	H2O	20	30	50	-0.2	yes
slug feces	Arion sp.	9	N2	L4	isoamylalc	EtOH	41	12	53	0.54717	yes
slug feces	Arion sp.	9	N2	L4	isoamylalc	DMSO	45	9	54	0.666667	yes
slug feces	Arion sp.	9	N2	L4	isoamylalc	H2O	32	15	47	0.361702	yes
slug feces	Arion sp.	9	N2	L4	octanol	EtOH	4	36	40	-0.8	yes
slug feces	Arion sp.	9	N2	L4	octanol	DMSO	7	27	34	-0.588235	yes
slug feces	Arion sp.	9	N2	L4	octanol	H2O	4	42	46	-0.826087	yes
slug feces	Arion sp.	10	MY2079	L4	feces	EtOH	25	30	55	-0.0909091	yes
slug feces	Arion sp.	10	MY2079	L4	feces	H2O	32	46	78	-0.179487	yes
slug feces	Arion sp.	10	MY2079	L4	feces	DMSO	38	29	67	0.134328	yes
slug feces	Arion sp.	10	MY2079	L4	isoamylalc	EtOH	44	11	55	0.6	yes
slug feces	Arion sp.	10	MY2079	L4	isoamylalc	H2O	59	13	72	0.638889	yes
slug feces	Arion sp.	10	MY2079	L4	isoamylalc	DMSO	59	14	73	0.616438	yes
slug feces	Arion sp.	10	MY2079	L4	octanol	EtOH	6	49	55	-0.781818	yes
slug feces	Arion sp.	10	MY2079	L4	octanol	H2O	4	42	46	-0.826087	yes
slug feces	Arion sp.	10	MY2079	L4	octanol	DMSO	1	44	45	-0.955556	yes
slug feces	Arion sp.	10	N2	L4	feces	EtOH	25	42	67	-0.253731	yes
slug feces	Arion sp.	10	N2	L4	feces	H2O	25	33	58	-0.137931	yes
slug feces	Arion sp.	10	N2	L4	feces	DMSO	24	36	60	-0.2	yes
slug feces	Arion sp.	10	N2	L4	isoamylalc	EtOH	53	10	63	0.68254	yes
slug feces	Arion sp.	10	N2	L4	isoamylalc	H2O	81	4	85	0.905882	yes
slug feces	Arion sp.	10	N2	L4	isoamylalc	DMSO	52	8	60	0.733333	yes
slug feces	Arion sp.	10	N2	L4	octanol	EtOH	4	32	36	-0.777778	yes
slug feces	Arion sp.	10	N2	L4	octanol	H2O	21	43	64	-0.34375	yes
slug feces	Arion sp.	10	N2	L4	octanol	DMSO	3	42	45	-0.866667	yes
slug feces	Arion sp.	11	MY2079	L4	feces	EtOH	28	22	50	0.12	yes
slug feces	Arion sp.	11	MY2079	L4	feces	H2O	26	45	71	-0.267606	yes
slug feces	Arion sp.	11	MY2079	L4	feces	DMSO	26	33	59	-0.118644	yes
slug feces	Arion sp.	11	MY2079	L4	isoamylalc	EtOH	55	21	76	0.447368	yes
slug feces	Arion sp.	11	MY2079	L4	isoamylalc	H2O	32	17	49	0.306122	yes
slug feces	Arion sp.	11	MY2079	L4	isoamylalc	DMSO	66	12	78	0.692308	yes
slug feces	Arion sp.	11	MY2079	L4	octanol	EtOH	11	47	58	-0.62069	yes
slug feces	Arion sp.	11	MY2079	L4	octanol	H2O	10	45	55	-0.636364	yes
slug feces	Arion sp.	11	MY2079	L4	octanol	DMSO	10	48	58	-0.655172	yes
slug feces	Arion sp.	11	N2	L4	feces	EtOH	25	30	55	-0.0909091	yes
slug feces	Arion sp.	11	N2	L4	feces	H2O	31	19	50	0.24	yes
slug feces	Arion sp.	11	N2	L4	feces	DMSO	34	31	65	0.0461538	yes
slug feces	Arion sp.	11	N2	L4	isoamylalc	EtOH	80	6	86	0.860465	yes
slug feces	Arion sp.	11	N2	L4	isoamylalc	H2O	48	3	51	0.882353	yes
slug feces	Arion sp.	11	N2	L4	isoamylalc	DMSO	70	6	76	0.842105	yes
slug feces	Arion sp.	11	N2	L4	octanol	EtOH	11	56	67	-0.671642	yes
slug feces	Arion sp.	11	N2	L4	octanol	H2O	14	35	49	-0.428571	yes
slug feces	Arion sp.	11	N2	L4	octanol	DMSO	8	37	45	-0.644444	yes

## Sheet: 3B Arion sp. feces dauer
assay	invertebrate_species	rep	worm_strain	stage	choice_treat	solvent	count_treat	count_control	total	index	include	comments
slug feces	Arion sp.	1	MY2079	dauer	feces	DMSO	30	29	59	0.0169492	yes
slug feces	Arion sp.	1	MY2079	dauer	feces	EtOH	48	34	82	0.170732	yes
slug feces	Arion sp.	1	MY2079	dauer	feces	H2O	63	43	106	0.188679	yes
slug feces	Arion sp.	1	MY2079	dauer	isoamylalc	H2O	83	8	91	0.824176	yes
slug feces	Arion sp.	1	MY2079	dauer	isoamylalc	DMSO	85	11	96	0.770833	yes
slug feces	Arion sp.	1	MY2079	dauer	isoamylalc	EtOH	108	7	115	0.878261	yes
slug feces	Arion sp.	1	MY2079	dauer	octanol	EtOH	19	27	46	-0.173913	yes
slug feces	Arion sp.	1	MY2079	dauer	octanol	DMSO	37	33	70	0.0571429	yes
slug feces	Arion sp.	1	MY2079	dauer	octanol	H2O	71	71	142	0	yes
slug feces	Arion sp.	1	N2	dauer	feces	H2O	4	6	10	-0.2	yes
slug feces	Arion sp.	1	N2	dauer	feces	EtOH	9	9	18	0	yes
slug feces	Arion sp.	1	N2	dauer	feces	DMSO	11	9	20	0.1	yes
slug feces	Arion sp.	1	N2	dauer	isoamylalc	H2O	12	3	15	0.6	yes
slug feces	Arion sp.	1	N2	dauer	isoamylalc	EtOH	21	5	26	0.615385	yes
slug feces	Arion sp.	1	N2	dauer	isoamylalc	DMSO	37	8	45	0.644444	yes
slug feces	Arion sp.	1	N2	dauer	octanol	EtOH	3	0	3	NA	no	threshold not reached, exclude
slug feces	Arion sp.	1	N2	dauer	octanol	H2O	3	3	6	NA	no	threshold not reached, exclude
slug feces	Arion sp.	1	N2	dauer	octanol	DMSO	6	4	10	0.2	yes
slug feces	Arion sp.	2	MY2079	dauer	feces	DMSO	45	42	87	0.0344828	yes
slug feces	Arion sp.	2	MY2079	dauer	feces	H2O	56	35	91	0.230769	yes
slug feces	Arion sp.	2	MY2079	dauer	feces	EtOH	51	56	107	-0.046729	yes
slug feces	Arion sp.	2	MY2079	dauer	isoamylalc	DMSO	65	24	89	0.460674	yes
slug feces	Arion sp.	2	MY2079	dauer	isoamylalc	EtOH	94	20	114	0.649123	yes
slug feces	Arion sp.	2	MY2079	dauer	isoamylalc	H2O	92	26	118	0.559322	yes
slug feces	Arion sp.	2	MY2079	dauer	octanol	DMSO	61	41	102	0.196078	yes
slug feces	Arion sp.	2	MY2079	dauer	octanol	EtOH	52	52	104	0	yes
slug feces	Arion sp.	2	MY2079	dauer	octanol	H2O	59	51	110	0.0727273	yes
slug feces	Arion sp.	2	N2	dauer	feces	DMSO	12	19	31	-0.225806	yes
slug feces	Arion sp.	2	N2	dauer	feces	H2O	19	22	41	-0.0731707	yes
slug feces	Arion sp.	2	N2	dauer	feces	EtOH	35	27	62	0.129032	yes
slug feces	Arion sp.	2	N2	dauer	isoamylalc	EtOH	11	9	20	0.1	yes
slug feces	Arion sp.	2	N2	dauer	isoamylalc	DMSO	20	6	26	0.538462	yes
slug feces	Arion sp.	2	N2	dauer	isoamylalc	H2O	21	8	29	0.448276	yes
slug feces	Arion sp.	2	N2	dauer	octanol	EtOH	7	4	11	0.272727	yes
slug feces	Arion sp.	2	N2	dauer	octanol	DMSO	10	6	16	0.25	yes
slug feces	Arion sp.	2	N2	dauer	octanol	H2O	11	14	25	-0.12	yes
slug feces	Arion sp.	3	MY2079	dauer	feces	EtOH	22	24	46	-0.0434783	yes
slug feces	Arion sp.	3	MY2079	dauer	feces	H2O	31	25	56	0.107143	yes
slug feces	Arion sp.	3	MY2079	dauer	feces	DMSO	30	31	61	-0.0163934	yes
slug feces	Arion sp.	3	MY2079	dauer	isoamylalc	EtOH	27	12	39	0.384615	yes
slug feces	Arion sp.	3	MY2079	dauer	isoamylalc	DMSO	33	8	41	0.609756	yes
slug feces	Arion sp.	3	MY2079	dauer	isoamylalc	H2O	47	20	67	0.402985	yes
slug feces	Arion sp.	3	MY2079	dauer	octanol	DMSO	32	13	45	0.422222	yes
slug feces	Arion sp.	3	MY2079	dauer	octanol	H2O	33	30	63	0.047619	yes
slug feces	Arion sp.	3	MY2079	dauer	octanol	EtOH	35	35	70	0	yes
slug feces	Arion sp.	3	N2	dauer	feces	H2O	2	1	3	NA	no	threshold not reached, exclude
slug feces	Arion sp.	3	N2	dauer	feces	EtOH	3	5	8	NA	no	threshold not reached, exclude
slug feces	Arion sp.	3	N2	dauer	feces	DMSO	4	6	10	-0.2	yes
slug feces	Arion sp.	3	N2	dauer	isoamylalc	DMSO	1	0	1	NA	no	threshold not reached, exclude
slug feces	Arion sp.	3	N2	dauer	isoamylalc	H2O	2	0	2	NA	no	threshold not reached, exclude
slug feces	Arion sp.	3	N2	dauer	isoamylalc	EtOH	3	0	3	NA	no	threshold not reached, exclude
slug feces	Arion sp.	3	N2	dauer	octanol	EtOH	0	1	1	NA	no	threshold not reached, exclude
slug feces	Arion sp.	3	N2	dauer	octanol	DMSO	1	1	2	NA	no	threshold not reached, exclude
slug feces	Arion sp.	3	N2	dauer	octanol	H2O	0	2	2	NA	no	threshold not reached, exclude
slug feces	Arion sp.	4	MY2079	dauer	feces	EtOH	41	39	80	0.025	yes
slug feces	Arion sp.	4	MY2079	dauer	feces	H2O	50	36	86	0.162791	yes
slug feces	Arion sp.	4	MY2079	dauer	feces	DMSO	52	50	102	0.0196078	yes
slug feces	Arion sp.	4	MY2079	dauer	isoamylalc	H2O	63	21	84	0.5	yes
slug feces	Arion sp.	4	MY2079	dauer	isoamylalc	DMSO	71	17	88	0.613636	yes
slug feces	Arion sp.	4	MY2079	dauer	isoamylalc	EtOH	62	34	96	0.291667	yes
slug feces	Arion sp.	4	MY2079	dauer	octanol	DMSO	38	41	79	-0.0379747	yes
slug feces	Arion sp.	4	MY2079	dauer	octanol	EtOH	50	56	106	-0.0566038	yes
slug feces	Arion sp.	4	MY2079	dauer	octanol	H2O	57	71	128	-0.109375	yes
slug feces	Arion sp.	4	N2	dauer	feces	EtOH	2	5	7	NA	no	threshold not reached, exclude
slug feces	Arion sp.	4	N2	dauer	feces	H2O	5	6	11	-0.0909091	yes
slug feces	Arion sp.	4	N2	dauer	feces	DMSO	22	19	41	0.0731707	yes
slug feces	Arion sp.	4	N2	dauer	isoamylalc	EtOH	6	4	10	0.2	yes
slug feces	Arion sp.	4	N2	dauer	isoamylalc	H2O	12	5	17	0.411765	ye+K86s
slug feces	Arion sp.	4	N2	dauer	isoamylalc	DMSO	9	9	18	0	yes
slug feces	Arion sp.	4	N2	dauer	octanol	EtOH	6	2	8	NA	no	threshold not reached, exclude
slug feces	Arion sp.	4	N2	dauer	octanol	H2O	4	7	11	-0.272727	yes
slug feces	Arion sp.	4	N2	dauer	octanol	DMSO	3	9	12	-0.5	yes
slug feces	Arion sp.	5	MY2079	dauer	feces	EtOH	36	34	70	0.0285714	yes
slug feces	Arion sp.	5	MY2079	dauer	feces	H2O	52	55	107	-0.0280374	yes
slug feces	Arion sp.	5	MY2079	dauer	feces	DMSO	44	72	116	-0.241379	yes
slug feces	Arion sp.	5	MY2079	dauer	isoamylalc	DMSO	33	8	41	0.609756	yes
slug feces	Arion sp.	5	MY2079	dauer	isoamylalc	H2O	58	16	74	0.567568	yes
slug feces	Arion sp.	5	MY2079	dauer	isoamylalc	EtOH	61	16	77	0.584416	yes
slug feces	Arion sp.	5	MY2079	dauer	octanol	DMSO	23	16	39	0.179487	yes
slug feces	Arion sp.	5	MY2079	dauer	octanol	H2O	17	40	57	-0.403509	yes
slug feces	Arion sp.	5	MY2079	dauer	octanol	EtOH	17	61	78	-0.564103	yes
slug feces	Arion sp.	5	N2	dauer	feces	DMSO	5	8	13	-0.230769	yes
slug feces	Arion sp.	5	N2	dauer	feces	H2O	5	10	15	-0.333333	yes
slug feces	Arion sp.	5	N2	dauer	feces	EtOH	12	9	21	0.142857	yes
slug feces	Arion sp.	5	N2	dauer	isoamylalc	H2O	8	4	12	0.333333	yes
slug feces	Arion sp.	5	N2	dauer	isoamylalc	DMSO	6	9	15	-0.2	yes
slug feces	Arion sp.	5	N2	dauer	isoamylalc	EtOH	9	6	15	0.2	yes
slug feces	Arion sp.	5	N2	dauer	octanol	DMSO	0	1	1	NA	no	threshold not reached, exclude
slug feces	Arion sp.	5	N2	dauer	octanol	H2O	1	3	4	NA	no	threshold not reached, exclude
slug feces	Arion sp.	5	N2	dauer	octanol	EtOH	6	3	9	NA	no	threshold not reached, exclude
slug feces	Arion sp.	6	MY2079	dauer	feces	H2O	28	20	48	0.166667	yes
slug feces	Arion sp.	6	MY2079	dauer	feces	DMSO	26	36	62	-0.16129	yes
slug feces	Arion sp.	6	MY2079	dauer	feces	EtOH	21	41	62	-0.322581	yes
slug feces	Arion sp.	6	MY2079	dauer	isoamylalc	EtOH	18	12	30	0.2	yes
slug feces	Arion sp.	6	MY2079	dauer	isoamylalc	DMSO	20	18	38	0.0526316	yes
slug feces	Arion sp.	6	MY2079	dauer	isoamylalc	H2O	30	39	69	-0.130435	yes
slug feces	Arion sp.	6	MY2079	dauer	octanol	EtOH	12	22	34	-0.294118	yes
slug feces	Arion sp.	6	MY2079	dauer	octanol	DMSO	23	38	61	-0.245902	yes
slug feces	Arion sp.	6	MY2079	dauer	octanol	H2O	32	42	74	-0.135135	yes
slug feces	Arion sp.	6	N2	dauer	feces	DMSO	0	0	0	NA	no	threshold not reached, exclude
slug feces	Arion sp.	6	N2	dauer	feces	EtOH	1	1	2	NA	no	threshold not reached, exclude
slug feces	Arion sp.	6	N2	dauer	feces	H2O	2	5	7	NA	no	threshold not reached, exclude
slug feces	Arion sp.	6	N2	dauer	isoamylalc	DMSO	3	1	4	NA	no	threshold not reached, exclude
slug feces	Arion sp.	6	N2	dauer	isoamylalc	H2O	0	4	4	NA	no	threshold not reached, exclude
slug feces	Arion sp.	6	N2	dauer	isoamylalc	EtOH	8	2	10	0.6	yes
slug feces	Arion sp.	6	N2	dauer	octanol	H2O	0	1	1	NA	no	threshold not reached, exclude
slug feces	Arion sp.	6	N2	dauer	octanol	DMSO	2	1	3	NA	no	threshold not reached, exclude
slug feces	Arion sp.	6	N2	dauer	octanol	EtOH	6	4	10	0.2	yes
slug feces	Arion sp.	7	MY2079	dauer	feces	EtOH	80	82	162	-0.0123457	yes
slug feces	Arion sp.	7	MY2079	dauer	feces	DMSO	92	77	169	0.0887574	yes
slug feces	Arion sp.	7	MY2079	dauer	feces	H2O	97	92	189	0.026455	yes
slug feces	Arion sp.	7	MY2079	dauer	isoamylalc	DMSO	85	80	165	0.030303	yes
slug feces	Arion sp.	7	MY2079	dauer	isoamylalc	EtOH	112	73	185	0.210811	yes
slug feces	Arion sp.	7	MY2079	dauer	isoamylalc	H2O	122	122	244	0	yes
slug feces	Arion sp.	7	MY2079	dauer	octanol	H2O	66	84	150	-0.12	yes
slug feces	Arion sp.	7	MY2079	dauer	octanol	EtOH	52	128	180	-0.422222	yes
slug feces	Arion sp.	7	MY2079	dauer	octanol	DMSO	95	96	191	-0.0052356	yes
slug feces	Arion sp.	7	N2	dauer	feces	DMSO	10	6	16	0.25	yes
slug feces	Arion sp.	7	N2	dauer	feces	EtOH	13	4	17	0.529412	yes
slug feces	Arion sp.	7	N2	dauer	feces	H2O	21	9	30	0.4	yes
slug feces	Arion sp.	7	N2	dauer	isoamylalc	DMSO	17	5	22	0.545455	yes
slug feces	Arion sp.	7	N2	dauer	isoamylalc	EtOH	17	9	26	0.307692	yes
slug feces	Arion sp.	7	N2	dauer	isoamylalc	H2O	19	13	32	0.1875	yes
slug feces	Arion sp.	7	N2	dauer	octanol	H2O	0	14	14	-1	yes
slug feces	Arion sp.	7	N2	dauer	octanol	DMSO	3	14	17	-0.647059	yes
slug feces	Arion sp.	7	N2	dauer	octanol	EtOH	8	15	23	-0.304348	yes
slug feces	Arion sp.	8	MY2079	dauer	feces	DMSO	121	137	258	-0.0620155	yes
slug feces	Arion sp.	8	MY2079	dauer	feces	H2O	118	158	276	-0.144928	yes
slug feces	Arion sp.	8	MY2079	dauer	feces	EtOH	182	192	374	-0.026738	yes
slug feces	Arion sp.	8	MY2079	dauer	isoamylalc	DMSO	69	87	156	-0.115385	yes
slug feces	Arion sp.	8	MY2079	dauer	isoamylalc	EtOH	102	102	204	0	yes
slug feces	Arion sp.	8	MY2079	dauer	isoamylalc	H2O	114	95	209	0.0909091	yes
slug feces	Arion sp.	8	MY2079	dauer	octanol	H2O	43	63	106	-0.188679	yes
slug feces	Arion sp.	8	MY2079	dauer	octanol	EtOH	49	71	120	-0.183333	yes
slug feces	Arion sp.	8	MY2079	dauer	octanol	DMSO	82	88	170	-0.0352941	yes
slug feces	Arion sp.	8	N2	dauer	feces	H2O	22	23	45	-0.0222222	yes
slug feces	Arion sp.	8	N2	dauer	feces	DMSO	31	20	51	0.215686	yes
slug feces	Arion sp.	8	N2	dauer	feces	EtOH	34	23	57	0.192982	yes
slug feces	Arion sp.	8	N2	dauer	isoamylalc	H2O	24	12	36	0.333333	yes
slug feces	Arion sp.	8	N2	dauer	isoamylalc	EtOH	28	8	36	0.555556	yes
slug feces	Arion sp.	8	N2	dauer	isoamylalc	DMSO	29	9	38	0.526316	yes
slug feces	Arion sp.	8	N2	dauer	octanol	DMSO	5	9	14	-0.285714	yes
slug feces	Arion sp.	8	N2	dauer	octanol	EtOH	9	6	15	0.2	yes
slug feces	Arion sp.	8	N2	dauer	octanol	H2O	4	14	18	-0.555556	yes
slug feces	Arion sp.	9	MY2079	dauer	feces	H2O	41	43	84	-0.0238095	yes
slug feces	Arion sp.	9	MY2079	dauer	feces	EtOH	45	63	108	-0.166667	yes
slug feces	Arion sp.	9	MY2079	dauer	feces	DMSO	64	62	126	0.015873	yes
slug feces	Arion sp.	9	MY2079	dauer	isoamylalc	DMSO	92	47	139	0.323741	yes
slug feces	Arion sp.	9	MY2079	dauer	isoamylalc	EtOH	90	51	141	0.276596	yes
slug feces	Arion sp.	9	MY2079	dauer	isoamylalc	H2O	105	61	166	0.26506	yes
slug feces	Arion sp.	9	MY2079	dauer	octanol	H2O	45	57	102	-0.117647	yes
slug feces	Arion sp.	9	MY2079	dauer	octanol	EtOH	50	66	116	-0.137931	yes
slug feces	Arion sp.	9	MY2079	dauer	octanol	DMSO	68	102	170	-0.2	yes
slug feces	Arion sp.	9	N2	dauer	feces	EtOH	7	8	15	-0.0666667	yes
slug feces	Arion sp.	9	N2	dauer	feces	H2O	12	16	28	-0.142857	yes
slug feces	Arion sp.	9	N2	dauer	feces	DMSO	13	19	32	-0.1875	yes
slug feces	Arion sp.	9	N2	dauer	isoamylalc	H2O	16	13	29	0.103448	yes
slug feces	Arion sp.	9	N2	dauer	isoamylalc	DMSO	24	7	31	0.548387	yes
slug feces	Arion sp.	9	N2	dauer	isoamylalc	EtOH	19	14	33	0.151515	yes
slug feces	Arion sp.	9	N2	dauer	octanol	H2O	4	6	10	-0.2	yes
slug feces	Arion sp.	9	N2	dauer	octanol	EtOH	5	6	11	-0.0909091	yes
slug feces	Arion sp.	9	N2	dauer	octanol	DMSO	6	5	11	0.0909091	yes
slug feces	Arion sp.	10	MY2079	dauer	feces	EtOH	51	79	130	-0.215385	yes
slug feces	Arion sp.	10	MY2079	dauer	feces	H2O	76	62	138	0.101449	yes
slug feces	Arion sp.	10	MY2079	dauer	feces	DMSO	110	84	194	0.134021	yes
slug feces	Arion sp.	10	MY2079	dauer	isoamylalc	H2O	85	47	132	0.287879	yes
slug feces	Arion sp.	10	MY2079	dauer	isoamylalc	DMSO	93	49	142	0.309859	yes
slug feces	Arion sp.	10	MY2079	dauer	isoamylalc	EtOH	101	42	143	0.412587	yes
slug feces	Arion sp.	10	MY2079	dauer	octanol	H2O	26	98	124	-0.580645	yes
slug feces	Arion sp.	10	MY2079	dauer	octanol	DMSO	36	114	150	-0.52	yes
slug feces	Arion sp.	10	MY2079	dauer	octanol	EtOH	44	161	205	-0.570732	yes
slug feces	Arion sp.	10	N2	dauer	feces	EtOH	14	11	25	0.12	yes
slug feces	Arion sp.	10	N2	dauer	feces	H2O	13	12	25	0.04	yes
slug feces	Arion sp.	10	N2	dauer	feces	DMSO	15	11	26	0.153846	yes
slug feces	Arion sp.	10	N2	dauer	isoamylalc	H2O	15	9	24	0.25	yes
slug feces	Arion sp.	10	N2	dauer	isoamylalc	EtOH	20	8	28	0.428571	yes
slug feces	Arion sp.	10	N2	dauer	isoamylalc	DMSO	41	14	55	0.490909	yes
slug feces	Arion sp.	10	N2	dauer	octanol	EtOH	17	13	30	0.133333	yes
slug feces	Arion sp.	10	N2	dauer	octanol	DMSO	13	19	32	-0.1875	yes
slug feces	Arion sp.	10	N2	dauer	octanol	H2O	18	26	44	-0.181818	yes
slug feces	Arion sp.	11	MY2079	dauer	feces	DMSO	43	46	89	-0.0337079	yes
slug feces	Arion sp.	11	MY2079	dauer	feces	H2O	60	56	116	0.0344828	yes
slug feces	Arion sp.	11	MY2079	dauer	feces	EtOH	73	61	134	0.0895522	yes
slug feces	Arion sp.	11	MY2079	dauer	isoamylalc	H2O	76	33	109	0.394495	yes
slug feces	Arion sp.	11	MY2079	dauer	isoamylalc	EtOH	84	59	143	0.174825	yes
slug feces	Arion sp.	11	MY2079	dauer	isoamylalc	DMSO	94	50	144	0.305556	yes
slug feces	Arion sp.	11	MY2079	dauer	octanol	DMSO	37	37	74	0	yes
slug feces	Arion sp.	11	MY2079	dauer	octanol	H2O	38	63	101	-0.247525	yes
slug feces	Arion sp.	11	MY2079	dauer	octanol	EtOH	52	66	118	-0.118644	yes
slug feces	Arion sp.	11	N2	dauer	feces	EtOH	10	13	23	-0.130435	yes
slug feces	Arion sp.	11	N2	dauer	feces	DMSO	20	15	35	0.142857	yes
slug feces	Arion sp.	11	N2	dauer	feces	H2O	15	22	37	-0.189189	yes
slug feces	Arion sp.	11	N2	dauer	isoamylalc	DMSO	9	9	18	0	yes
slug feces	Arion sp.	11	N2	dauer	isoamylalc	EtOH	14	6	20	0.4	yes
slug feces	Arion sp.	11	N2	dauer	isoamylalc	H2O	15	6	21	0.428571	yes
slug feces	Arion sp.	11	N2	dauer	octanol	EtOH	6	8	14	-0.142857	yes
slug feces	Arion sp.	11	N2	dauer	octanol	DMSO	10	10	20	0	yes
slug feces	Arion sp.	11	N2	dauer	octanol	H2O	14	17	31	-0.0967742	yes
slug feces	Arion sp.	12	MY2079	dauer	feces	EtOH	40	31	71	0.126761	yes
slug feces	Arion sp.	12	MY2079	dauer	feces	DMSO	43	32	75	0.146667	yes
slug feces	Arion sp.	12	MY2079	dauer	feces	H2O	51	35	86	0.186047	yes
slug feces	Arion sp.	12	MY2079	dauer	isoamylalc	EtOH	39	16	55	0.418182	yes
slug feces	Arion sp.	12	MY2079	dauer	isoamylalc	DMSO	55	20	75	0.466667	yes
slug feces	Arion sp.	12	MY2079	dauer	isoamylalc	H2O	69	35	104	0.326923	yes
slug feces	Arion sp.	12	MY2079	dauer	octanol	DMSO	27	46	73	-0.260274	yes
slug feces	Arion sp.	12	MY2079	dauer	octanol	EtOH	36	42	78	-0.0769231	yes
slug feces	Arion sp.	12	MY2079	dauer	octanol	H2O	26	66	92	-0.434783	yes
slug feces	Arion sp.	12	N2	dauer	feces	EtOH	3	1	4	NA	no	threshold not reached, exclude
slug feces	Arion sp.	12	N2	dauer	feces	DMSO	17	12	29	0.172414	yes
slug feces	Arion sp.	12	N2	dauer	feces	H2O	18	17	35	0.0285714	yes
slug feces	Arion sp.	12	N2	dauer	isoamylalc	EtOH	11	4	15	0.466667	yes
slug feces	Arion sp.	12	N2	dauer	isoamylalc	H2O	13	17	30	-0.133333	yes
slug feces	Arion sp.	12	N2	dauer	isoamylalc	DMSO	13	19	32	-0.1875	yes
slug feces	Arion sp.	12	N2	dauer	octanol	DMSO	11	8	19	0.157895	yes
slug feces	Arion sp.	12	N2	dauer	octanol	H2O	17	19	36	-0.0555556	yes
slug feces	Arion sp.	12	N2	dauer	octanol	EtOH	16	22	38	-0.157895	yes
slug feces	Arion sp.	13	MY2079	dauer	feces	DMSO	47	44	91	0.032967	yes
slug feces	Arion sp.	13	MY2079	dauer	feces	H2O	49	57	106	-0.0754717	yes
slug feces	Arion sp.	13	MY2079	dauer	feces	EtOH	66	48	114	0.157895	yes
slug feces	Arion sp.	13	MY2079	dauer	isoamylalc	H2O	74	34	108	0.37037	yes
slug feces	Arion sp.	13	MY2079	dauer	isoamylalc	EtOH	82	27	109	0.504587	yes
slug feces	Arion sp.	13	MY2079	dauer	isoamylalc	DMSO	74	35	109	0.357798	yes
slug feces	Arion sp.	13	MY2079	dauer	octanol	H2O	22	57	79	-0.443038	yes
slug feces	Arion sp.	13	MY2079	dauer	octanol	DMSO	25	68	93	-0.462366	yes
slug feces	Arion sp.	13	MY2079	dauer	octanol	EtOH	34	67	101	-0.326733	yes
slug feces	Arion sp.	13	N2	dauer	feces	EtOH	2	9	11	-0.636364	yes
slug feces	Arion sp.	13	N2	dauer	feces	H2O	10	7	17	0.176471	yes
slug feces	Arion sp.	13	N2	dauer	feces	DMSO	19	17	36	0.0555556	yes
slug feces	Arion sp.	13	N2	dauer	isoamylalc	EtOH	7	10	17	-0.176471	yes
slug feces	Arion sp.	13	N2	dauer	isoamylalc	H2O	14	12	26	0.0769231	yes
slug feces	Arion sp.	13	N2	dauer	isoamylalc	DMSO	15	18	33	-0.0909091	yes
slug feces	Arion sp.	13	N2	dauer	octanol	EtOH	5	7	12	-0.166667	yes
slug feces	Arion sp.	13	N2	dauer	octanol	H2O	4	13	17	-0.529412	yes
slug feces	Arion sp.	13	N2	dauer	octanol	DMSO	6	11	17	-0.294118	yes
