# Supplementary material for: The nematode Caenorhabditis elegans and diverse potential invertebrate vectors predominantly interact opportunistically
Source: Frontiers journal article supplement (doi:10.3389/fevo.2023.1069056), 2023-02-01
Supplement: Table_7.XLSX [file Table_7.XLSX]

## Sheet: 4B O. asellus gas L4
invertebrate_species	rep	worm_stage	treat_left	treat_right	choice_treat	worm_strain	count_left	count_right	total	index	include
Oniscus asellus	1	L4	empty	empty	empty	MY2079	58	63	121	-0.0413223	yes
Oniscus asellus	1	L4	empty	empty	empty	N2	30	36	66	-0.0909091	yes
Oniscus asellus	1	L4	isoamylalc	empty paper	isoamylalc	MY2079	42	9	51	0.647059	yes
Oniscus asellus	1	L4	isoamylalc	empty paper	isoamylalc	N2	78	1	79	0.974684	yes
Oniscus asellus	1	L4	isopod	empty	isopod	MY2079	51	37	88	0.159091	yes
Oniscus asellus	1	L4	isopod	empty	isopod	N2	61	36	97	0.257732	yes
Oniscus asellus	1	L4	octanol	empty paper	octanol	MY2079	29	32	61	-0.0491803	yes
Oniscus asellus	1	L4	octanol	empty paper	octanol	N2	20	57	77	-0.480519	yes
Oniscus asellus	2	L4	empty	empty	empty	MY2079	23	42	65	-0.292308	yes
Oniscus asellus	2	L4	empty	empty	empty	N2	85	78	163	0.0429448	yes
Oniscus asellus	2	L4	isoamylalc	empty paper	isoamylalc	MY2079	23	11	34	0.352941	yes
Oniscus asellus	2	L4	isoamylalc	empty paper	isoamylalc	N2	68	2	70	0.942857	yes
Oniscus asellus	2	L4	isopod	empty	isopod	MY2079	25	24	49	0.0204082	yes
Oniscus asellus	2	L4	isopod	empty	isopod	N2	26	0	26	1	yes
Oniscus asellus	2	L4	octanol	empty paper	octanol	MY2079	26	22	48	0.0833333	yes
Oniscus asellus	2	L4	octanol	empty paper	octanol	N2	18	16	34	0.0588235	yes
Oniscus asellus	3	L4	empty	empty	empty	MY2079	9	13	22	0.181818	yes
Oniscus asellus	3	L4	empty	empty	empty	N2	44	37	81	-0.0864198	yes
Oniscus asellus	3	L4	empty paper	isoamylalc	isoamylalc	MY2079	7	18	25	0.44	yes
Oniscus asellus	3	L4	empty paper	isoamylalc	isoamylalc	N2	7	31	38	0.631579	yes
Oniscus asellus	3	L4	empty	isopod	isopod	MY2079	14	14	28	0	yes
Oniscus asellus	3	L4	empty	isopod	isopod	N2	38	19	57	-0.333333	yes
Oniscus asellus	3	L4	empty paper	octanol	octanol	MY2079	31	25	56	-0.107143	yes
Oniscus asellus	3	L4	empty paper	octanol	octanol	N2	32	10	42	-0.52381	yes
Oniscus asellus	4	L4	empty	empty	empty	MY2079	13	27	40	0.35	yes
Oniscus asellus	4	L4	empty	empty	empty	N2	41	19	60	-0.366667	yes
Oniscus asellus	4	L4	empty paper	isoamylalc	isoamylalc	MY2079	7	30	37	0.621622	yes
Oniscus asellus	4	L4	empty paper	isoamylalc	isoamylalc	N2	3	61	64	0.90625	yes
Oniscus asellus	4	L4	empty	isopod	isopod	MY2079	32	43	75	0.146667	yes
Oniscus asellus	4	L4	empty	isopod	isopod	N2	27	26	53	-0.0188679	yes
Oniscus asellus	4	L4	empty paper	octanol	octanol	MY2079	44	36	80	-0.1	yes
Oniscus asellus	4	L4	empty paper	octanol	octanol	N2	55	25	80	-0.375	yes
Oniscus asellus	5	L4	empty	empty	empty	MY2079	33	65	98	0.326531	yes
Oniscus asellus	5	L4	empty	empty	empty	N2	64	50	114	-0.122807	yes
Oniscus asellus	5	L4	empty paper	isoamylalc	isoamylalc	MY2079	10	60	70	0.714286	yes
Oniscus asellus	5	L4	empty paper	isoamylalc	isoamylalc	N2	7	87	94	0.851064	yes
Oniscus asellus	5	L4	empty	isopod	isopod	MY2079	19	95	114	0.666667	yes
Oniscus asellus	5	L4	empty	isopod	isopod	N2	55	71	126	0.126984	yes
Oniscus asellus	5	L4	empty paper	octanol	octanol	MY2079	73	33	106	-0.377358	yes
Oniscus asellus	5	L4	empty paper	octanol	octanol	N2	88	32	120	-0.466667	yes
Oniscus asellus	6	L4	empty	empty	empty	MY2079	41	80	121	-0.322314	yes
Oniscus asellus	6	L4	empty	empty	empty	N2	35	32	67	0.0447761	yes
Oniscus asellus	6	L4	isoamylalc	empty paper	isoamylalc	MY2079	74	24	98	0.510204	yes
Oniscus asellus	6	L4	isoamylalc	empty paper	isoamylalc	N2	65	2	67	0.940299	yes
Oniscus asellus	6	L4	isopod	empty	isopod	MY2079	59	44	103	0.145631	yes
Oniscus asellus	6	L4	isopod	empty	isopod	N2	48	21	69	0.391304	yes
Oniscus asellus	6	L4	octanol	empty paper	octanol	MY2079	31	47	78	-0.205128	yes
Oniscus asellus	6	L4	octanol	empty paper	octanol	N2	22	85	107	-0.588785	yes
Oniscus asellus	7	L4	empty	empty	empty	MY2079	49	70	119	-0.176471	yes
Oniscus asellus	7	L4	empty	empty	empty	N2	161	140	301	0.0697674	yes
Oniscus asellus	7	L4	isoamylalc	empty paper	isoamylalc	MY2079	28	12	40	0.4	yes
Oniscus asellus	7	L4	isoamylalc	empty paper	isoamylalc	N2	84	24	108	0.555556	yes
Oniscus asellus	7	L4	isopod	empty	isopod	MY2079	45	85	130	-0.307692	yes
Oniscus asellus	7	L4	isopod	empty	isopod	N2	87	76	163	0.0674847	yes
Oniscus asellus	7	L4	octanol	empty paper	octanol	MY2079	38	65	103	-0.262136	yes
Oniscus asellus	7	L4	octanol	empty paper	octanol	N2	67	93	160	-0.1625	yes
Oniscus asellus	8	L4	empty	empty	empty	MY2079	46	29	75	-0.226667	yes
Oniscus asellus	8	L4	empty	empty	empty	N2	40	44	84	0.047619	yes
Oniscus asellus	8	L4	empty paper	isoamylalc	isoamylalc	MY2079	14	65	79	0.64557	yes
Oniscus asellus	8	L4	empty paper	isoamylalc	isoamylalc	N2	0	76	76	1	yes
Oniscus asellus	8	L4	empty	isopod	isopod	MY2079	54	87	141	0.234043	yes
Oniscus asellus	8	L4	empty	isopod	isopod	N2	53	47	100	-0.06	yes
Oniscus asellus	8	L4	empty paper	octanol	octanol	MY2079	52	20	72	-0.444444	yes
Oniscus asellus	8	L4	empty paper	octanol	octanol	N2	92	32	124	-0.483871	yes
Oniscus asellus	9	L4	empty	empty	empty	MY2079	51	44	95	-0.0736842	yes
Oniscus asellus	9	L4	empty	empty	empty	N2	60	56	116	-0.0344828	yes
Oniscus asellus	9	L4	empty paper	isoamylalc	isoamylalc	MY2079	35	75	110	0.363636	yes
Oniscus asellus	9	L4	empty paper	isoamylalc	isoamylalc	N2	5	138	143	0.93007	yes
Oniscus asellus	9	L4	empty	isopod	isopod	MY2079	49	25	74	-0.324324	yes
Oniscus asellus	9	L4	empty	isopod	isopod	N2	59	47	106	-0.113208	yes
Oniscus asellus	9	L4	empty paper	octanol	octanol	MY2079	75	30	105	-0.428571	yes
Oniscus asellus	9	L4	empty paper	octanol	octanol	N2	65	32	97	-0.340206	yes
Oniscus asellus	10	L4	empty	empty	empty	MY2079	88	37	125	-0.408	yes
Oniscus asellus	10	L4	empty	empty	empty	N2	59	77	136	0.132353	yes
Oniscus asellus	10	L4	empty paper	isoamylalc	isoamylalc	MY2079	42	72	114	0.263158	yes
Oniscus asellus	10	L4	empty paper	isoamylalc	isoamylalc	N2	17	137	154	0.779221	yes
Oniscus asellus	10	L4	empty	isopod	isopod	MY2079	125	103	228	-0.0964912	yes
Oniscus asellus	10	L4	empty	isopod	isopod	N2	89	94	183	0.0273224	yes
Oniscus asellus	10	L4	empty paper	octanol	octanol	MY2079	82	33	115	-0.426087	yes
Oniscus asellus	10	L4	empty paper	octanol	octanol	N2	179	52	231	-0.549784	yes
Oniscus asellus	11	L4	empty	empty	empty	MY2079	52	60	112	-0.0714286	yes
Oniscus asellus	11	L4	empty	empty	empty	N2	53	46	99	0.0707071	yes
Oniscus asellus	11	L4	isoamylalc	empty paper	isoamylalc	MY2079	75	34	109	0.376147	yes
Oniscus asellus	11	L4	isoamylalc	empty paper	isoamylalc	N2	86	17	103	0.669903	yes
Oniscus asellus	11	L4	isopod	empty	isopod	MY2079	37	48	85	-0.129412	yes
Oniscus asellus	11	L4	isopod	empty	isopod	N2	53	34	87	0.218391	yes
Oniscus asellus	11	L4	octanol	empty paper	octanol	MY2079	54	60	114	-0.0526316	yes
Oniscus asellus	11	L4	octanol	empty paper	octanol	N2	47	75	122	-0.229508	yes

## Sheet: 4B O. asellus gas dauer
invertebrate_species	rep	worm_stage	treat_left	treat_right	choice_treat	worm_strain	count_left	count_right	total	index	include
Oniscus asellus	1	dauer	empty	empty	empty	MY2079	195	60	255	0.529412	yes
Oniscus asellus	1	dauer	empty	empty	empty	N2	69	64	133	0.037594	yes
Oniscus asellus	1	dauer	isoamylalc	empty paper	isoamylalc	MY2079	254	60	314	0.617834	yes
Oniscus asellus	1	dauer	isoamylalc	empty paper	isoamylalc	N2	156	20	176	0.772727	yes
Oniscus asellus	1	dauer	isopod	empty	isopod	MY2079	90	121	211	-0.146919	yes
Oniscus asellus	1	dauer	isopod	empty	isopod	N2	64	57	121	0.0578512	yes
Oniscus asellus	1	dauer	octanol	empty paper	octanol	MY2079	126	42	168	0.5	yes
Oniscus asellus	1	dauer	octanol	empty paper	octanol	N2	43	66	109	-0.211009	yes
Oniscus asellus	2	dauer	empty	empty	empty	MY2079	93	97	190	-0.0210526	yes
Oniscus asellus	2	dauer	empty	empty	empty	N2	96	97	193	-0.00518135	yes
Oniscus asellus	2	dauer	isoamylalc	empty paper	isoamylalc	MY2079	181	58	239	0.514644	yes
Oniscus asellus	2	dauer	isoamylalc	empty paper	isoamylalc	N2	126	7	133	0.894737	yes
Oniscus asellus	2	dauer	isopod	empty	isopod	MY2079	94	91	185	0.0162162	yes
Oniscus asellus	2	dauer	isopod	empty	isopod	N2	78	98	176	-0.113636	yes
Oniscus asellus	2	dauer	octanol	empty paper	octanol	MY2079	80	147	227	-0.295154	yes
Oniscus asellus	2	dauer	octanol	empty paper	octanol	N2	80	70	150	0.0666667	yes
Oniscus asellus	3	dauer	empty	empty	empty	MY2079	80	72	152	-0.0526316	yes
Oniscus asellus	3	dauer	empty	empty	empty	N2	54	36	90	-0.2	yes
Oniscus asellus	3	dauer	empty paper	isoamylalc	isoamylalc	MY2079	38	77	115	0.33913	yes
Oniscus asellus	3	dauer	empty paper	isoamylalc	isoamylalc	N2	20	80	100	0.6	yes
Oniscus asellus	3	dauer	empty	isopod	isopod	MY2079	60	74	134	0.104478	yes
Oniscus asellus	3	dauer	empty	isopod	isopod	N2	30	38	68	0.117647	yes
Oniscus asellus	3	dauer	empty paper	octanol	octanol	MY2079	50	59	109	0.0825688	yes
Oniscus asellus	3	dauer	empty paper	octanol	octanol	N2	30	19	49	-0.22449	yes
Oniscus asellus	4	dauer	empty	empty	empty	MY2079	48	62	110	0.127273	yes
Oniscus asellus	4	dauer	empty	empty	empty	N2	38	37	75	-0.0133333	yes
Oniscus asellus	4	dauer	empty paper	isoamylalc	isoamylalc	MY2079	30	100	130	0.538462	yes
Oniscus asellus	4	dauer	empty paper	isoamylalc	isoamylalc	N2	9	73	82	0.780488	yes
Oniscus asellus	4	dauer	empty	isopod	isopod	MY2079	41	34	75	-0.0933333	yes
Oniscus asellus	4	dauer	empty	isopod	isopod	N2	21	20	41	-0.0243902	yes
Oniscus asellus	4	dauer	empty paper	octanol	octanol	MY2079	48	58	106	0.0943396	yes
Oniscus asellus	4	dauer	empty paper	octanol	octanol	N2	34	26	60	-0.133333	yes
Oniscus asellus	5	dauer	empty	empty	empty	MY2079	113	97	210	-0.0761905	yes
Oniscus asellus	5	dauer	empty	empty	empty	N2	88	59	147	-0.197279	yes
Oniscus asellus	5	dauer	empty paper	isoamylalc	isoamylalc	MY2079	50	166	216	0.537037	yes
Oniscus asellus	5	dauer	empty paper	isoamylalc	isoamylalc	N2	7	133	140	0.9	yes
Oniscus asellus	5	dauer	empty	isopod	isopod	MY2079	132	151	283	0.0671378	yes
Oniscus asellus	5	dauer	empty	isopod	isopod	N2	100	82	182	-0.0989011	yes
Oniscus asellus	5	dauer	empty paper	octanol	octanol	MY2079	116	97	213	-0.0892019	yes
Oniscus asellus	5	dauer	empty paper	octanol	octanol	N2	71	86	157	0.0955414	yes
Oniscus asellus	6	dauer	empty	empty	empty	MY2079	45	45	90	0	yes
Oniscus asellus	6	dauer	empty	empty	empty	N2	22	26	48	-0.0833333	yes
Oniscus asellus	6	dauer	isoamylalc	empty paper	isoamylalc	MY2079	116	21	137	0.693431	yes
Oniscus asellus	6	dauer	isoamylalc	empty paper	isoamylalc	N2	53	6	59	0.79661	yes
Oniscus asellus	6	dauer	isopod	empty	isopod	MY2079	98	37	135	0.451852	yes
Oniscus asellus	6	dauer	isopod	empty	isopod	N2	25	34	59	-0.152542	yes
Oniscus asellus	6	dauer	octanol	empty paper	octanol	MY2079	94	31	125	0.504	yes
Oniscus asellus	6	dauer	octanol	empty paper	octanol	N2	13	25	38	-0.315789	yes
Oniscus asellus	7	dauer	empty	empty	empty	MY2079	47	48	95	-0.0105263	yes
Oniscus asellus	7	dauer	empty	empty	empty	N2	20	22	42	-0.047619	yes
Oniscus asellus	7	dauer	isoamylalc	empty paper	isoamylalc	MY2079	53	22	75	0.413333	yes
Oniscus asellus	7	dauer	isoamylalc	empty paper	isoamylalc	N2	52	10	62	0.677419	yes
Oniscus asellus	7	dauer	isopod	empty	isopod	MY2079	37	38	75	-0.0133333	yes
Oniscus asellus	7	dauer	isopod	empty	isopod	N2	33	37	70	-0.0571429	yes
Oniscus asellus	7	dauer	octanol	empty paper	octanol	MY2079	27	62	89	-0.393258	yes
Oniscus asellus	7	dauer	octanol	empty paper	octanol	N2	42	47	89	-0.0561798	yes
Oniscus asellus	8	dauer	empty	empty	empty	MY2079	47	62	109	0.137615	yes
Oniscus asellus	8	dauer	empty	empty	empty	N2	37	27	64	-0.15625	yes
Oniscus asellus	8	dauer	empty paper	isoamylalc	isoamylalc	MY2079	12	83	95	0.747368	yes
Oniscus asellus	8	dauer	empty paper	isoamylalc	isoamylalc	N2	4	75	79	0.898734	yes
Oniscus asellus	8	dauer	empty	isopod	isopod	MY2079	44	28	72	-0.222222	yes
Oniscus asellus	8	dauer	empty	isopod	isopod	N2	21	14	35	-0.2	yes
Oniscus asellus	8	dauer	empty paper	octanol	octanol	MY2079	42	47	89	0.0561798	yes
Oniscus asellus	8	dauer	empty paper	octanol	octanol	N2	24	23	47	-0.0212766	yes
Oniscus asellus	9	dauer	empty	empty	empty	MY2079	34	47	81	0.160494	yes
Oniscus asellus	9	dauer	empty	empty	empty	N2	51	25	76	-0.342105	yes
Oniscus asellus	9	dauer	empty paper	isoamylalc	isoamylalc	MY2079	17	102	119	0.714286	yes
Oniscus asellus	9	dauer	empty paper	isoamylalc	isoamylalc	N2	12	78	90	0.733333	yes
Oniscus asellus	9	dauer	empty	isopod	isopod	MY2079	55	50	105	-0.047619	yes
Oniscus asellus	9	dauer	empty	isopod	isopod	N2	45	42	87	-0.0344828	yes
Oniscus asellus	9	dauer	empty paper	octanol	octanol	MY2079	67	48	115	-0.165217	yes
Oniscus asellus	9	dauer	empty paper	octanol	octanol	N2	43	26	69	-0.246377	yes
Oniscus asellus	10	dauer	empty	empty	empty	MY2079	96	104	200	0.04	yes
Oniscus asellus	10	dauer	empty	empty	empty	N2	39	52	91	0.142857	yes
Oniscus asellus	10	dauer	empty paper	isoamylalc	isoamylalc	MY2079	54	186	240	0.55	yes
Oniscus asellus	10	dauer	empty paper	isoamylalc	isoamylalc	N2	3	117	120	0.95	yes
Oniscus asellus	10	dauer	empty	isopod	isopod	MY2079	122	112	234	-0.042735	yes
Oniscus asellus	10	dauer	empty	isopod	isopod	N2	31	40	71	0.126761	yes
Oniscus asellus	10	dauer	empty paper	octanol	octanol	MY2079	117	92	209	-0.119617	yes
Oniscus asellus	10	dauer	empty paper	octanol	octanol	N2	36	33	69	-0.0434783	yes
Oniscus asellus	11	dauer	empty	empty	empty	MY2079	60	70	130	-0.0769231	yes
Oniscus asellus	11	dauer	empty	empty	empty	N2	30	24	54	0.111111	yes
Oniscus asellus	11	dauer	isoamylalc	empty paper	isoamylalc	MY2079	29	80	109	-0.46789	yes
Oniscus asellus	11	dauer	isoamylalc	empty paper	isoamylalc	N2	46	5	51	0.803922	yes
Oniscus asellus	11	dauer	isopod	empty	isopod	MY2079	40	30	70	0.142857	yes
Oniscus asellus	11	dauer	isopod	empty	isopod	N2	17	9	26	0.307692	yes
Oniscus asellus	11	dauer	octanol	empty paper	octanol	MY2079	42	52	94	-0.106383	yes
Oniscus asellus	11	dauer	octanol	empty paper	octanol	N2	17	17	34	0	yes

## Sheet: 4C P. scaber gas L4
invertebrate_species	rep	worm_stage	treat_left	treat_right	choice_treat	worm_strain	count_left	count_right	total	index	include
Porcellio scaber	1	L4	empty	empty	empty	MY2079	30	47	77	-0.220779	yes
Porcellio scaber	1	L4	empty	empty	empty	N2	34	29	63	0.0793651	yes
Porcellio scaber	1	L4	isoamylalc	empty paper	isoamylalc	MY2079	37	13	50	0.48	yes
Porcellio scaber	1	L4	isoamylalc	empty paper	isoamylalc	N2	53	1	54	0.962963	yes
Porcellio scaber	1	L4	isopod	empty	isopod	MY2079	22	31	53	-0.169811	yes
Porcellio scaber	1	L4	isopod	empty	isopod	N2	57	31	88	0.295455	yes
Porcellio scaber	1	L4	octanol	empty paper	octanol	MY2079	15	21	36	-0.166667	yes
Porcellio scaber	1	L4	octanol	empty paper	octanol	N2	34	53	87	-0.218391	yes
Porcellio scaber	2	L4	empty	empty	empty	MY2079	15	20	35	-0.142857	yes
Porcellio scaber	2	L4	empty	empty	empty	N2	13	22	35	-0.257143	yes
Porcellio scaber	2	L4	isoamylalc	empty paper	isoamylalc	MY2079	31	5	36	0.722222	yes
Porcellio scaber	2	L4	isoamylalc	empty paper	isoamylalc	N2	44	0	44	1	yes
Porcellio scaber	2	L4	isopod	empty	isopod	MY2079	37	16	53	0.396226	yes
Porcellio scaber	2	L4	isopod	empty	isopod	N2	39	12	51	0.529412	yes
Porcellio scaber	2	L4	octanol	empty paper	octanol	MY2079	14	29	43	-0.348837	yes
Porcellio scaber	2	L4	octanol	empty paper	octanol	N2	22	46	68	-0.352941	yes
Porcellio scaber	3	L4	empty	empty	empty	MY2079	20	30	50	0.2	yes
Porcellio scaber	3	L4	empty	empty	empty	N2	26	38	64	0.1875	yes
Porcellio scaber	3	L4	empty paper	isoamylalc	isoamylalc	MY2079	7	41	48	0.708333	yes
Porcellio scaber	3	L4	empty paper	isoamylalc	isoamylalc	N2	16	75	91	0.648352	yes
Porcellio scaber	3	L4	empty	isopod	isopod	MY2079	31	37	68	0.0882353	yes
Porcellio scaber	3	L4	empty	isopod	isopod	N2	35	37	72	0.0277778	yes
Porcellio scaber	3	L4	empty paper	octanol	octanol	MY2079	32	27	59	-0.0847458	yes
Porcellio scaber	3	L4	empty paper	octanol	octanol	N2	49	22	71	-0.380282	yes
Porcellio scaber	4	L4	empty	empty	empty	MY2079	52	38	90	-0.155556	yes
Porcellio scaber	4	L4	empty	empty	empty	N2	96	80	176	-0.0909091	yes
Porcellio scaber	4	L4	empty paper	isoamylalc	isoamylalc	MY2079	70	86	156	0.102564	yes
Porcellio scaber	4	L4	empty paper	isoamylalc	isoamylalc	N2	41	129	170	0.517647	yes
Porcellio scaber	4	L4	empty	isopod	isopod	MY2079	81	69	150	-0.08	yes
Porcellio scaber	4	L4	empty	isopod	isopod	N2	66	87	153	0.137255	yes
Porcellio scaber	4	L4	empty paper	octanol	octanol	MY2079	34	48	82	0.170732	yes
Porcellio scaber	4	L4	empty paper	octanol	octanol	N2	77	96	173	0.109827	yes
Porcellio scaber	5	L4	empty	empty	empty	MY2079	100	89	189	0.0582011	yes
Porcellio scaber	5	L4	empty	empty	empty	N2	133	102	235	0.131915	yes
Porcellio scaber	5	L4	isoamylalc	empty paper	isoamylalc	MY2079	50	9	59	0.694915	yes
Porcellio scaber	5	L4	isoamylalc	empty paper	isoamylalc	N2	143	33	176	0.625	yes
Porcellio scaber	5	L4	isopod	empty	isopod	MY2079	82	56	138	0.188406	yes
Porcellio scaber	5	L4	isopod	empty	isopod	N2	88	89	177	-0.00564972	yes
Porcellio scaber	5	L4	octanol	empty paper	octanol	MY2079	103	100	203	0.0147783	yes
Porcellio scaber	5	L4	octanol	empty paper	octanol	N2	75	100	175	-0.142857	yes
Porcellio scaber	6	L4	empty	empty	empty	MY2079	65	56	121	0.0743802	yes
Porcellio scaber	6	L4	empty	empty	empty	N2	55	45	100	0.1	yes
Porcellio scaber	6	L4	isoamylalc	empty paper	isoamylalc	MY2079	62	8	70	0.771429	yes
Porcellio scaber	6	L4	isoamylalc	empty paper	isoamylalc	N2	126	9	135	0.866667	yes
Porcellio scaber	6	L4	isopod	empty	isopod	MY2079	59	37	96	0.229167	yes
Porcellio scaber	6	L4	isopod	empty	isopod	N2	47	54	101	-0.0693069	yes
Porcellio scaber	6	L4	octanol	empty paper	octanol	MY2079	18	91	109	-0.669725	yes
Porcellio scaber	6	L4	octanol	empty paper	octanol	N2	38	119	157	-0.515924	yes
Porcellio scaber	7	L4	empty	empty	empty	MY2079	32	57	89	-0.280899	yes
Porcellio scaber	7	L4	empty	empty	empty	N2	44	44	88	0	yes
Porcellio scaber	7	L4	isoamylalc	empty paper	isoamylalc	MY2079	84	0	84	1	yes
Porcellio scaber	7	L4	isoamylalc	empty paper	isoamylalc	N2	65	6	71	0.830986	yes
Porcellio scaber	7	L4	isopod	empty	isopod	MY2079	29	49	78	-0.25641	yes
Porcellio scaber	7	L4	isopod	empty	isopod	N2	15	30	45	-0.333333	yes
Porcellio scaber	7	L4	octanol	empty paper	octanol	MY2079	54	58	112	-0.0357143	yes
Porcellio scaber	7	L4	octanol	empty paper	octanol	N2	24	61	85	-0.435294	yes
Porcellio scaber	8	L4	empty	empty	empty	MY2079	33	46	79	0.164557	yes
Porcellio scaber	8	L4	empty	empty	empty	N2	35	60	95	0.263158	yes
Porcellio scaber	8	L4	empty paper	isoamylalc	isoamylalc	MY2079	8	36	44	0.636364	yes
Porcellio scaber	8	L4	empty paper	isoamylalc	isoamylalc	N2	1	73	74	0.972973	yes
Porcellio scaber	8	L4	empty	isopod	isopod	MY2079	24	48	72	0.333333	yes
Porcellio scaber	8	L4	empty	isopod	isopod	N2	47	34	81	-0.160494	yes
Porcellio scaber	8	L4	empty paper	octanol	octanol	MY2079	66	27	93	-0.419355	yes
Porcellio scaber	8	L4	empty paper	octanol	octanol	N2	63	20	83	-0.518072	yes
Porcellio scaber	9	L4	empty	empty	empty	MY2079	103	113	216	0.0462963	yes
Porcellio scaber	9	L4	empty	empty	empty	N2	109	89	198	-0.10101	yes
Porcellio scaber	9	L4	empty paper	isoamylalc	isoamylalc	MY2079	79	74	153	-0.0326797	yes
Porcellio scaber	9	L4	empty paper	isoamylalc	isoamylalc	N2	13	159	172	0.848837	yes
Porcellio scaber	9	L4	empty	isopod	isopod	MY2079	97	111	208	0.0673077	yes
Porcellio scaber	9	L4	empty	isopod	isopod	N2	76	63	139	-0.0935252	yes
Porcellio scaber	9	L4	empty paper	octanol	octanol	MY2079	105	70	175	-0.2	yes
Porcellio scaber	9	L4	empty paper	octanol	octanol	N2	82	30	112	-0.464286	yes
Porcellio scaber	10	L4	empty	empty	empty	MY2079	27	47	74	0.27027	yes
Porcellio scaber	10	L4	empty	empty	empty	N2	79	53	132	-0.19697	yes
Porcellio scaber	10	L4	empty paper	isoamylalc	isoamylalc	MY2079	20	52	72	0.444444	yes
Porcellio scaber	10	L4	empty paper	isoamylalc	isoamylalc	N2	3	143	146	0.958904	yes
Porcellio scaber	10	L4	empty	isopod	isopod	MY2079	34	26	60	-0.133333	yes
Porcellio scaber	10	L4	empty	isopod	isopod	N2	8	128	136	0.882353	yes
Porcellio scaber	10	L4	empty paper	octanol	octanol	MY2079	55	12	67	-0.641791	yes
Porcellio scaber	10	L4	empty paper	octanol	octanol	N2	81	19	100	-0.62	yes
Porcellio scaber	11	L4	empty	empty	empty	MY2079	29	14	43	0.348837	yes
Porcellio scaber	11	L4	empty	empty	empty	N2	35	64	99	-0.292929	yes
Porcellio scaber	11	L4	isoamylalc	empty paper	isoamylalc	MY2079	27	10	37	0.459459	yes
Porcellio scaber	11	L4	isoamylalc	empty paper	isoamylalc	N2	70	5	75	0.866667	yes
Porcellio scaber	11	L4	isopod	empty	isopod	MY2079	29	29	58	0	yes
Porcellio scaber	11	L4	isopod	empty	isopod	N2	37	37	74	0	yes
Porcellio scaber	11	L4	octanol	empty paper	octanol	MY2079	36	23	59	0.220339	yes
Porcellio scaber	11	L4	octanol	empty paper	octanol	N2	38	60	98	-0.22449	yes

## Sheet: 4C P. scaber gas dauer
invertebrate_species	rep	worm_stage	treat_left	treat_right	choice_treat	worm_strain	count_left	count_right	total	index	include
Porcellio scaber	1	dauer	empty	empty	empty	MY2079	132	100	232	0.137931	yes
Porcellio scaber	1	dauer	empty	empty	empty	N2	73	76	149	-0.0201342	yes
Porcellio scaber	1	dauer	isoamylalc	empty paper	isoamylalc	MY2079	236	72	308	0.532468	yes
Porcellio scaber	1	dauer	isoamylalc	empty paper	isoamylalc	N2	104	9	113	0.840708	yes
Porcellio scaber	1	dauer	isopod	empty	isopod	MY2079	201	180	381	0.0551181	yes
Porcellio scaber	1	dauer	isopod	empty	isopod	N2	39	39	78	0	yes
Porcellio scaber	1	dauer	octanol	empty paper	octanol	MY2079	195	182	377	0.0344828	yes
Porcellio scaber	1	dauer	octanol	empty paper	octanol	N2	60	86	146	-0.178082	yes
Porcellio scaber	2	dauer	empty	empty	empty	MY2079	64	60	124	0.0322581	yes
Porcellio scaber	2	dauer	empty	empty	empty	N2	38	27	65	0.169231	yes
Porcellio scaber	2	dauer	isoamylalc	empty paper	isoamylalc	MY2079	53	40	93	0.139785	yes
Porcellio scaber	2	dauer	isoamylalc	empty paper	isoamylalc	N2	66	14	80	0.65	yes
Porcellio scaber	2	dauer	isopod	empty	isopod	MY2079	71	57	128	0.109375	yes
Porcellio scaber	2	dauer	isopod	empty	isopod	N2	45	30	75	0.2	yes
Porcellio scaber	2	dauer	octanol	empty paper	octanol	MY2079	106	85	191	0.109948	yes
Porcellio scaber	2	dauer	octanol	empty paper	octanol	N2	44	36	80	0.1	yes
Porcellio scaber	3	dauer	empty	empty	empty	MY2079	81	60	141	-0.148936	yes
Porcellio scaber	3	dauer	empty	empty	empty	N2	76	56	132	-0.151515	yes
Porcellio scaber	3	dauer	empty paper	isoamylalc	isoamylalc	MY2079	37	77	114	0.350877	yes
Porcellio scaber	3	dauer	empty paper	isoamylalc	isoamylalc	N2	9	91	100	0.82	yes
Porcellio scaber	3	dauer	empty	isopod	isopod	MY2079	44	67	111	0.207207	yes
Porcellio scaber	3	dauer	empty	isopod	isopod	N2	27	37	64	0.15625	yes
Porcellio scaber	3	dauer	empty paper	octanol	octanol	MY2079	61	106	167	0.269461	yes
Porcellio scaber	3	dauer	empty paper	octanol	octanol	N2	42	39	81	-0.037037	yes
Porcellio scaber	4	dauer	empty	empty	empty	MY2079	211	158	369	-0.143631	yes
Porcellio scaber	4	dauer	empty	empty	empty	N2	74	59	133	-0.112782	yes
Porcellio scaber	4	dauer	empty paper	isoamylalc	isoamylalc	MY2079	240	138	378	-0.269841	yes
Porcellio scaber	4	dauer	empty paper	isoamylalc	isoamylalc	N2	51	12	63	-0.619048	yes
Porcellio scaber	4	dauer	empty	isopod	isopod	MY2079	201	121	322	-0.248447	yes
Porcellio scaber	4	dauer	empty	isopod	isopod	N2	17	23	40	0.15	yes
Porcellio scaber	4	dauer	empty paper	octanol	octanol	MY2079	188	259	447	0.158837	yes
Porcellio scaber	4	dauer	empty paper	octanol	octanol	N2	20	9	29	-0.37931	yes
Porcellio scaber	5	dauer	empty	empty	empty	MY2079	55	52	107	0.0280374	yes
Porcellio scaber	5	dauer	empty	empty	empty	N2	31	38	69	-0.101449	yes
Porcellio scaber	5	dauer	isoamylalc	empty paper	isoamylalc	MY2079	40	10	50	0.6	yes
Porcellio scaber	5	dauer	isoamylalc	empty paper	isoamylalc	N2	43	2	45	0.911111	yes
Porcellio scaber	5	dauer	isopod	empty	isopod	MY2079	21	29	50	-0.16	yes
Porcellio scaber	5	dauer	isopod	empty	isopod	N2	28	20	48	0.166667	yes
Porcellio scaber	5	dauer	octanol	empty paper	octanol	MY2079	62	36	98	0.265306	yes
Porcellio scaber	5	dauer	octanol	empty paper	octanol	N2	44	29	73	0.205479	yes
Porcellio scaber	6	dauer	empty	empty	empty	MY2079	95	113	208	-0.0865385	yes
Porcellio scaber	6	dauer	empty	empty	empty	N2	43	27	70	0.228571	yes
Porcellio scaber	6	dauer	isoamylalc	empty paper	isoamylalc	MY2079	105	19	124	0.693548	yes
Porcellio scaber	6	dauer	isoamylalc	empty paper	isoamylalc	N2	46	9	55	0.672727	yes
Porcellio scaber	6	dauer	isopod	empty	isopod	MY2079	67	62	129	0.0387597	yes
Porcellio scaber	6	dauer	isopod	empty	isopod	N2	32	25	57	0.122807	yes
Porcellio scaber	6	dauer	octanol	empty paper	octanol	MY2079	86	29	115	0.495652	yes
Porcellio scaber	6	dauer	octanol	empty paper	octanol	N2	22	31	53	-0.169811	yes
Porcellio scaber	7	dauer	empty	empty	empty	MY2079	65	97	162	-0.197531	yes
Porcellio scaber	7	dauer	empty	empty	empty	N2	37	38	75	-0.0133333	yes
Porcellio scaber	7	dauer	isoamylalc	empty paper	isoamylalc	MY2079	111	24	135	0.644444	yes
Porcellio scaber	7	dauer	isoamylalc	empty paper	isoamylalc	N2	92	12	104	0.769231	yes
Porcellio scaber	7	dauer	isopod	empty	isopod	MY2079	76	61	137	0.109489	yes
Porcellio scaber	7	dauer	isopod	empty	isopod	N2	28	44	72	-0.222222	yes
Porcellio scaber	7	dauer	octanol	empty paper	octanol	MY2079	95	35	130	0.461538	yes
Porcellio scaber	7	dauer	octanol	empty paper	octanol	N2	18	35	53	-0.320755	yes
Porcellio scaber	8	dauer	empty	empty	empty	MY2079	70	50	120	-0.166667	yes
Porcellio scaber	8	dauer	empty	empty	empty	N2	29	35	64	0.09375	yes
Porcellio scaber	8	dauer	empty paper	isoamylalc	isoamylalc	MY2079	16	67	83	0.614458	yes
Porcellio scaber	8	dauer	empty paper	isoamylalc	isoamylalc	N2	4	107	111	0.927928	yes
Porcellio scaber	8	dauer	empty	isopod	isopod	MY2079	69	66	135	-0.0222222	yes
Porcellio scaber	8	dauer	empty	isopod	isopod	N2	22	46	68	0.352941	yes
Porcellio scaber	8	dauer	empty paper	octanol	octanol	MY2079	48	30	78	-0.230769	yes
Porcellio scaber	8	dauer	empty paper	octanol	octanol	N2	37	39	76	0.0263158	yes
Porcellio scaber	9	dauer	empty	empty	empty	MY2079	57	63	120	0.05	yes
Porcellio scaber	9	dauer	empty	empty	empty	N2	38	35	73	-0.0410959	yes
Porcellio scaber	9	dauer	empty paper	isoamylalc	isoamylalc	MY2079	11	20	31	0.290323	yes
Porcellio scaber	9	dauer	empty paper	isoamylalc	isoamylalc	N2	9	61	70	0.742857	yes
Porcellio scaber	9	dauer	empty	isopod	isopod	MY2079	38	33	71	-0.0704225	yes
Porcellio scaber	9	dauer	empty	isopod	isopod	N2	21	26	47	0.106383	yes
Porcellio scaber	9	dauer	empty paper	octanol	octanol	MY2079	58	52	110	-0.0545455	yes
Porcellio scaber	9	dauer	empty paper	octanol	octanol	N2	40	19	59	-0.355932	yes
Porcellio scaber	10	dauer	empty	empty	empty	MY2079	59	56	115	-0.026087	yes
Porcellio scaber	10	dauer	empty	empty	empty	N2	22	40	62	0.290323	yes
Porcellio scaber	10	dauer	empty paper	isoamylalc	isoamylalc	MY2079	13	145	158	0.835443	yes
Porcellio scaber	10	dauer	empty paper	isoamylalc	isoamylalc	N2	8	76	84	0.809524	yes
Porcellio scaber	10	dauer	empty	isopod	isopod	MY2079	110	121	231	0.047619	yes
Porcellio scaber	10	dauer	empty	isopod	isopod	N2	43	26	69	-0.246377	yes
Porcellio scaber	10	dauer	empty paper	octanol	octanol	MY2079	52	70	122	0.147541	yes
Porcellio scaber	10	dauer	empty paper	octanol	octanol	N2	25	19	44	-0.136364	yes
Porcellio scaber	11	dauer	empty	empty	empty	MY2079	49	60	109	-0.100917	yes
Porcellio scaber	11	dauer	empty	empty	empty	N2	28	21	49	0.142857	yes
Porcellio scaber	11	dauer	isoamylalc	empty paper	isoamylalc	MY2079	120	14	134	0.791045	yes
Porcellio scaber	11	dauer	isoamylalc	empty paper	isoamylalc	N2	39	3	42	0.857143	yes
Porcellio scaber	11	dauer	isopod	empty	isopod	MY2079	45	54	99	-0.0909091	yes
Porcellio scaber	11	dauer	isopod	empty	isopod	N2	17	28	45	-0.244444	yes
Porcellio scaber	11	dauer	octanol	empty paper	octanol	MY2079	53	31	84	0.261905	yes
Porcellio scaber	11	dauer	octanol	empty paper	octanol	N2	17	21	38	-0.105263	yes

## Sheet: 4D Armadillidium sp. gas L4
invertebrate_species	rep	worm_stage	treat_left	treat_right	choice_treat	worm_strain	count_left	count_right	total	index	include
Armadillidium sp.	1	L4	empty	empty	empty	MY2079	25	26	51	-0.0196078	yes
Armadillidium sp.	1	L4	empty	empty	empty	N2	61	56	117	0.042735	yes
Armadillidium sp.	1	L4	isoamylalc	empty paper	isoamylalc	MY2079	77	6	83	0.855422	yes
Armadillidium sp.	1	L4	isoamylalc	empty paper	isoamylalc	N2	66	2	68	0.941176	yes
Armadillidium sp.	1	L4	isopod	empty	isopod	MY2079	25	38	63	-0.206349	yes
Armadillidium sp.	1	L4	isopod	empty	isopod	N2	50	69	119	-0.159664	yes
Armadillidium sp.	1	L4	octanol	empty paper	octanol	MY2079	18	30	48	-0.25	yes
Armadillidium sp.	1	L4	octanol	empty paper	octanol	N2	38	99	137	-0.445255	yes
Armadillidium sp.	2	L4	empty	empty	empty	MY2079	23	39	62	0.258065	yes
Armadillidium sp.	2	L4	empty	empty	empty	N2	21	57	78	0.461538	yes
Armadillidium sp.	2	L4	empty paper	isoamylalc	isoamylalc	MY2079	2	22	24	0.833333	yes
Armadillidium sp.	2	L4	empty paper	isoamylalc	isoamylalc	N2	4	84	88	0.909091	yes
Armadillidium sp.	2	L4	empty	isopod	isopod	MY2079	18	65	83	0.566265	yes
Armadillidium sp.	2	L4	empty	isopod	isopod	N2	43	34	77	-0.116883	yes
Armadillidium sp.	2	L4	empty paper	octanol	octanol	MY2079	22	57	79	0.443038	yes
Armadillidium sp.	2	L4	empty paper	octanol	octanol	N2	64	13	77	-0.662338	yes
Armadillidium sp.	3	L4	empty	empty	empty	MY2079	44	45	89	0.011236	yes
Armadillidium sp.	3	L4	empty	empty	empty	N2	27	19	46	-0.173913	yes
Armadillidium sp.	3	L4	empty paper	isoamylalc	isoamylalc	MY2079	12	19	31	0.225806	yes
Armadillidium sp.	3	L4	empty paper	isoamylalc	isoamylalc	N2	4	83	87	0.908046	yes
Armadillidium sp.	3	L4	empty	isopod	isopod	MY2079	49	76	125	0.216	yes
Armadillidium sp.	3	L4	empty	isopod	isopod	N2	32	30	62	-0.0322581	yes
Armadillidium sp.	3	L4	empty paper	octanol	octanol	MY2079	48	20	68	-0.411765	yes
Armadillidium sp.	3	L4	empty paper	octanol	octanol	N2	74	17	91	-0.626374	yes
Armadillidium sp.	4	L4	empty	empty	empty	MY2079	35	48	83	0.156627	yes
Armadillidium sp.	4	L4	empty	empty	empty	N2	73	76	149	0.0201342	yes
Armadillidium sp.	4	L4	empty paper	isoamylalc	isoamylalc	MY2079	10	83	93	0.784946	yes
Armadillidium sp.	4	L4	empty paper	isoamylalc	isoamylalc	N2	6	113	119	0.89916	yes
Armadillidium sp.	4	L4	empty	isopod	isopod	MY2079	23	25	48	0.0416667	yes
Armadillidium sp.	4	L4	empty	isopod	isopod	N2	34	25	59	-0.152542	yes
Armadillidium sp.	4	L4	empty paper	octanol	octanol	MY2079	20	34	54	0.259259	yes
Armadillidium sp.	4	L4	empty paper	octanol	octanol	N2	90	16	106	-0.698113	yes
Armadillidium sp.	5	L4	empty	empty	empty	MY2079	43	39	82	0.0487805	yes
Armadillidium sp.	5	L4	empty	empty	empty	N2	49	38	87	0.126437	yes
Armadillidium sp.	5	L4	isoamylalc	empty paper	isoamylalc	MY2079	68	11	79	0.721519	yes
Armadillidium sp.	5	L4	isoamylalc	empty paper	isoamylalc	N2	74	5	79	0.873418	yes
Armadillidium sp.	5	L4	isopod	empty	isopod	MY2079	35	61	96	-0.270833	yes
Armadillidium sp.	5	L4	isopod	empty	isopod	N2	44	42	86	0.0232558	yes
Armadillidium sp.	5	L4	octanol	empty paper	octanol	MY2079	23	60	83	-0.445783	yes
Armadillidium sp.	5	L4	octanol	empty paper	octanol	N2	21	57	78	-0.461538	yes
Armadillidium sp.	6	L4	empty	empty	empty	MY2079	57	41	98	0.163265	yes
Armadillidium sp.	6	L4	empty	empty	empty	N2	56	65	121	-0.0743802	yes
Armadillidium sp.	6	L4	isoamylalc	empty paper	isoamylalc	MY2079	58	34	92	0.26087	yes
Armadillidium sp.	6	L4	isoamylalc	empty paper	isoamylalc	N2	124	6	130	0.907692	yes
Armadillidium sp.	6	L4	isopod	empty	isopod	MY2079	87	51	138	0.26087	yes
Armadillidium sp.	6	L4	isopod	empty	isopod	N2	55	46	101	0.0891089	yes
Armadillidium sp.	6	L4	octanol	empty paper	octanol	MY2079	45	104	149	-0.395973	yes
Armadillidium sp.	6	L4	octanol	empty paper	octanol	N2	30	77	107	-0.439252	yes
Armadillidium sp.	7	L4	empty	empty	empty	MY2079	45	57	102	-0.117647	yes
Armadillidium sp.	7	L4	empty	empty	empty	N2	21	31	52	-0.192308	yes
Armadillidium sp.	7	L4	isoamylalc	empty paper	isoamylalc	MY2079	18	8	26	0.384615	yes
Armadillidium sp.	7	L4	isoamylalc	empty paper	isoamylalc	N2	54	1	55	0.963636	yes
Armadillidium sp.	7	L4	isopod	empty	isopod	MY2079	26	38	64	-0.1875	yes
Armadillidium sp.	7	L4	isopod	empty	isopod	N2	40	21	61	0.311475	yes
Armadillidium sp.	7	L4	octanol	empty paper	octanol	MY2079	31	45	76	-0.184211	yes
Armadillidium sp.	7	L4	octanol	empty paper	octanol	N2	20	57	77	-0.480519	yes
Armadillidium sp.	8	L4	empty	empty	empty	MY2079	36	54	90	0.2	yes
Armadillidium sp.	8	L4	empty	empty	empty	N2	33	30	63	-0.047619	yes
Armadillidium sp.	8	L4	empty paper	isoamylalc	isoamylalc	MY2079	9	39	48	0.625	yes
Armadillidium sp.	8	L4	empty paper	isoamylalc	isoamylalc	N2	1	75	76	0.973684	yes
Armadillidium sp.	8	L4	empty	isopod	isopod	MY2079	24	57	81	0.407407	yes
Armadillidium sp.	8	L4	empty	isopod	isopod	N2	35	63	98	0.285714	yes
Armadillidium sp.	8	L4	empty paper	octanol	octanol	MY2079	64	13	77	-0.662338	yes
Armadillidium sp.	8	L4	empty paper	octanol	octanol	N2	64	21	85	-0.505882	yes
Armadillidium sp.	9	L4	empty	empty	empty	MY2079	62	32	94	-0.319149	yes
Armadillidium sp.	9	L4	empty	empty	empty	N2	53	42	95	-0.115789	yes
Armadillidium sp.	9	L4	empty paper	isoamylalc	isoamylalc	MY2079	18	53	71	0.492958	yes
Armadillidium sp.	9	L4	empty paper	isoamylalc	isoamylalc	N2	2	70	72	0.944444	yes
Armadillidium sp.	9	L4	empty	isopod	isopod	MY2079	36	50	86	0.162791	yes
Armadillidium sp.	9	L4	empty	isopod	isopod	N2	45	37	82	-0.097561	yes
Armadillidium sp.	9	L4	empty paper	octanol	octanol	MY2079	66	12	78	-0.692308	yes
Armadillidium sp.	9	L4	empty paper	octanol	octanol	N2	52	25	77	-0.350649	yes
Armadillidium sp.	10	L4	empty	empty	empty	MY2079	22	52	74	-0.405405	yes
Armadillidium sp.	10	L4	empty	empty	empty	N2	38	51	89	-0.146067	yes
Armadillidium sp.	10	L4	isoamylalc	empty paper	isoamylalc	MY2079	60	13	73	0.643836	yes
Armadillidium sp.	10	L4	isoamylalc	empty paper	isoamylalc	N2	66	6	72	0.833333	yes
Armadillidium sp.	10	L4	isopod	empty	isopod	MY2079	38	28	66	0.151515	yes
Armadillidium sp.	10	L4	isopod	empty	isopod	N2	77	34	111	0.387387	yes
Armadillidium sp.	10	L4	octanol	empty paper	octanol	MY2079	28	53	81	-0.308642	yes
Armadillidium sp.	10	L4	octanol	empty paper	octanol	N2	15	69	84	-0.642857	yes
Armadillidium sp.	11	L4	empty	empty	empty	MY2079	52	52	104	0	yes
Armadillidium sp.	11	L4	empty	empty	empty	N2	85	57	142	0.197183	yes
Armadillidium sp.	11	L4	isoamylalc	empty paper	isoamylalc	MY2079	50	44	94	0.0638298	yes
Armadillidium sp.	11	L4	isoamylalc	empty paper	isoamylalc	N2	58	19	77	0.506494	yes
Armadillidium sp.	11	L4	isopod	empty	isopod	MY2079	39	31	70	0.114286	yes
Armadillidium sp.	11	L4	isopod	empty	isopod	N2	45	42	87	0.0344828	yes
Armadillidium sp.	11	L4	octanol	empty paper	octanol	MY2079	33	33	66	0	yes
Armadillidium sp.	11	L4	octanol	empty paper	octanol	N2	38	46	84	-0.0952381	yes

## Sheet: 4D Armadillidium sp. gas dauer
invertebrate_species	rep	worm_stage	treat_left	treat_right	choice_treat	worm_strain	count_left	count_right	total	index	include
Armadillidium sp.	1	dauer	octanol	empty paper	octanol	MY2079	103	97	200	0.03	yes
Armadillidium sp.	1	dauer	isopod	empty	isopod	MY2079	58	89	147	-0.21088	yes
Armadillidium sp.	1	dauer	isoamylalc	empty paper	isoamylalc	MY2079	117	31	148	0.581081	yes
Armadillidium sp.	1	dauer	empty	empty	empty	MY2079	95	114	209	-0.09091	yes
Armadillidium sp.	1	dauer	isoamylalc	empty paper	isoamylalc	N2	91	19	110	0.654545	yes
Armadillidium sp.	1	dauer	octanol	empty paper	octanol	N2	58	68	126	-0.07937	yes
Armadillidium sp.	1	dauer	empty	empty	empty	N2	66	71	137	-0.0365	yes
Armadillidium sp.	1	dauer	isopod	empty	isopod	N2	45	63	108	-0.16667	yes
Armadillidium sp.	2	dauer	empty paper	isoamylalc	isoamylalc	N2	9	90	99	0.818182	yes
Armadillidium sp.	2	dauer	empty paper	isoamylalc	isoamylalc	MY2079	23	80	103	0.553398	yes
Armadillidium sp.	2	dauer	empty paper	octanol	octanol	N2	49	30	79	-0.24051	yes
Armadillidium sp.	2	dauer	empty paper	octanol	octanol	MY2079	34	70	104	0.346154	yes
Armadillidium sp.	2	dauer	empty	empty	empty	N2	61	46	107	-0.14019	yes
Armadillidium sp.	2	dauer	empty	empty	empty	MY2079	74	74	148	0	yes
Armadillidium sp.	2	dauer	empty	isopod	isopod	N2	66	49	115	-0.14783	yes
Armadillidium sp.	2	dauer	empty	isopod	isopod	MY2079	43	70	113	0.238938	yes
Armadillidium sp.	3	dauer	empty paper	isoamylalc	isoamylalc	N2	26	185	211	0.753555	yes
Armadillidium sp.	3	dauer	empty paper	isoamylalc	isoamylalc	MY2079	67	225	292	0.541096	yes
Armadillidium sp.	3	dauer	empty paper	octanol	octanol	N2	62	57	119	-0.04202	yes
Armadillidium sp.	3	dauer	empty paper	octanol	octanol	MY2079	91	111	202	0.09901	yes
Armadillidium sp.	3	dauer	empty	empty	empty	N2	74	50	124	-0.19355	yes
Armadillidium sp.	3	dauer	empty	empty	empty	MY2079	112	137	249	0.100402	yes
Armadillidium sp.	3	dauer	empty	isopod	isopod	N2	61	78	139	0.122302	yes
Armadillidium sp.	3	dauer	empty	isopod	isopod	MY2079	101	141	242	0.165289	yes
Armadillidium sp.	4	dauer	empty paper	isoamylalc	isoamylalc	N2	21	210	231	0.818182	yes
Armadillidium sp.	4	dauer	empty paper	isoamylalc	isoamylalc	MY2079	61	246	307	0.602606	yes
Armadillidium sp.	4	dauer	empty paper	octanol	octanol	N2	72	97	169	0.147929	yes
Armadillidium sp.	4	dauer	empty paper	octanol	octanol	MY2079	164	117	281	-0.16726	yes
Armadillidium sp.	4	dauer	empty	empty	empty	N2	185	201	386	0.041451	yes
Armadillidium sp.	4	dauer	empty	empty	empty	MY2079	192	189	381	-0.00787	yes
Armadillidium sp.	4	dauer	empty	isopod	isopod	N2	52	57	109	0.045872	yes
Armadillidium sp.	4	dauer	empty	isopod	isopod	MY2079	218	171	389	-0.12082	yes
Armadillidium sp.	5	dauer	empty	empty	empty	MY2079	86	31	117	0.470085	yes
Armadillidium sp.	5	dauer	empty	empty	empty	N2	31	32	63	-0.01587	yes
Armadillidium sp.	5	dauer	isoamylalc	empty paper	isoamylalc	MY2079	98	10	108	0.814815	yes
Armadillidium sp.	5	dauer	isoamylalc	empty paper	isoamylalc	N2	80	7	87	0.83908	yes
Armadillidium sp.	5	dauer	isopod	empty	isopod	MY2079	68	81	149	-0.08725	yes
Armadillidium sp.	5	dauer	isopod	empty	isopod	N2	18	11	29	0.241379	yes
Armadillidium sp.	5	dauer	octanol	empty paper	octanol	MY2079	87	15	102	0.705882	yes
Armadillidium sp.	5	dauer	octanol	empty paper	octanol	N2	37	30	67	0.104478	yes
Armadillidium sp.	6	dauer	empty	empty	empty	MY2079	61	41	102	0.196078	yes
Armadillidium sp.	6	dauer	empty	empty	empty	N2	31	36	67	-0.07463	yes
Armadillidium sp.	6	dauer	isoamylalc	empty paper	isoamylalc	MY2079	104	38	142	0.464789	yes
Armadillidium sp.	6	dauer	isoamylalc	empty paper	isoamylalc	N2	66	12	78	0.692308	yes
Armadillidium sp.	6	dauer	isopod	empty	isopod	MY2079	87	113	200	-0.13	yes
Armadillidium sp.	6	dauer	isopod	empty	isopod	N2	47	57	104	-0.09615	yes
Armadillidium sp.	6	dauer	octanol	empty paper	octanol	MY2079	154	44	198	0.555556	yes
Armadillidium sp.	6	dauer	octanol	empty paper	octanol	N2	35	45	80	-0.125	yes
Armadillidium sp.	7	dauer	empty	empty	empty	MY2079	78	58	136	0.147059	yes
Armadillidium sp.	7	dauer	empty	empty	empty	N2	15	28	43	-0.30233	yes
Armadillidium sp.	7	dauer	isoamylalc	empty paper	isoamylalc	MY2079	91	43	134	0.358209	yes
Armadillidium sp.	7	dauer	isoamylalc	empty paper	isoamylalc	N2	92	11	103	0.786408	yes
Armadillidium sp.	7	dauer	isopod	empty	isopod	MY2079	72	29	101	0.425743	yes
Armadillidium sp.	7	dauer	isopod	empty	isopod	N2	33	24	57	0.157895	yes
Armadillidium sp.	7	dauer	octanol	empty paper	octanol	MY2079	94	52	146	0.287671	yes
Armadillidium sp.	7	dauer	octanol	empty paper	octanol	N2	41	47	88	-0.06818	yes
Armadillidium sp.	8	dauer	empty paper	octanol	octanol	N2	25	19	44	-0.13636	yes
Armadillidium sp.	8	dauer	empty paper	octanol	octanol	MY2079	56	55	111	-0.00901	yes
Armadillidium sp.	8	dauer	empty	empty	empty	N2	17	21	38	0.105263	yes
Armadillidium sp.	8	dauer	empty	empty	empty	MY2079	68	70	138	0.014493	yes
Armadillidium sp.	8	dauer	empty	isopod	isopod	N2	30	24	54	-0.11111	yes
Armadillidium sp.	8	dauer	empty	isopod	isopod	MY2079	40	52	92	0.130435	yes
Armadillidium sp.	8	dauer	empty paper	isoamylalc	isoamylalc	N2	7	37	44	0.681818	yes
Armadillidium sp.	8	dauer	empty paper	isoamylalc	isoamylalc	MY2079	12	104	116	0.793103	yes
Armadillidium sp.	9	dauer	empty paper	octanol	octanol	N2	34	24	58	-0.17241	yes
Armadillidium sp.	9	dauer	empty paper	octanol	octanol	MY2079	58	63	121	0.041322	yes
Armadillidium sp.	9	dauer	empty	empty	empty	N2	26	20	46	-0.13043	yes
Armadillidium sp.	9	dauer	empty	empty	empty	MY2079	51	53	104	0.019231	yes
Armadillidium sp.	9	dauer	empty	isopod	isopod	N2	33	25	58	-0.13793	yes
Armadillidium sp.	9	dauer	empty	isopod	isopod	MY2079	47	43	90	-0.04444	yes
Armadillidium sp.	9	dauer	empty paper	isoamylalc	isoamylalc	N2	12	48	60	0.6	yes
Armadillidium sp.	9	dauer	empty paper	isoamylalc	isoamylalc	MY2079	8	110	118	0.864407	yes
Armadillidium sp.	10	dauer	empty	empty	empty	MY2079	30	26	56	0.071429	yes
Armadillidium sp.	10	dauer	empty	empty	empty	N2	24	28	52	-0.07692	yes
Armadillidium sp.	10	dauer	octanol	empty paper	octanol	MY2079	41	27	68	0.205882	yes
Armadillidium sp.	10	dauer	octanol	empty paper	octanol	N2	23	28	51	-0.09804	yes
Armadillidium sp.	10	dauer	isoamylalc	empty paper	isoamylalc	MY2079	64	7	71	0.802817	yes
Armadillidium sp.	10	dauer	isoamylalc	empty paper	isoamylalc	N2	83	5	88	0.886364	yes
Armadillidium sp.	10	dauer	isopod	empty	isopod	MY2079	18	20	38	-0.05263	yes
Armadillidium sp.	10	dauer	isopod	empty	isopod	N2	17	17	34	0	yes
Armadillidium sp.	11	dauer	empty	empty	empty	MY2079	69	78	147	-0.06122	yes
Armadillidium sp.	11	dauer	empty	empty	empty	N2	20	21	41	-0.02439	yes
Armadillidium sp.	11	dauer	octanol	empty paper	octanol	MY2079	29	31	60	-0.03333	yes
Armadillidium sp.	11	dauer	octanol	empty paper	octanol	N2	30	25	55	0.090909	yes
Armadillidium sp.	11	dauer	isoamylalc	empty paper	isoamylalc	MY2079	102	36	138	0.478261	yes
Armadillidium sp.	11	dauer	isoamylalc	empty paper	isoamylalc	N2	38	1	39	0.948718	yes
Armadillidium sp.	11	dauer	isopod	empty	isopod	MY2079	33	35	68	-0.02941	yes
Armadillidium sp.	11	dauer	isopod	empty	isopod	N2	27	15	42	0.285714	yes

## Sheet: 4E Lithobius sp. gas L4
invertebrate_species	rep	worm_stage	treat_left	treat_right	choice_treat	worm_strain	count_left	count_right	total	index	include
Lithobius sp.	1	L4	empty mesh	chilopod	chilopod	MY2079	9	36	45	0.6	yes
Lithobius sp.	1	L4	empty mesh	chilopod	chilopod	N2	26	14	40	-0.3	yes
Lithobius sp.	1	L4	empty	empty	empty	MY2079	20	21	41	0.0243902	yes
Lithobius sp.	1	L4	empty	empty	empty	N2	29	30	59	0.0169492	yes
Lithobius sp.	1	L4	empty paper	isoamylalc	isoamylalc	MY2079	6	23	29	0.586207	yes
Lithobius sp.	1	L4	empty paper	isoamylalc	isoamylalc	N2	1	44	45	0.955556	yes
Lithobius sp.	1	L4	empty paper	octanol	octanol	MY2079	18	12	30	-0.2	yes
Lithobius sp.	1	L4	empty paper	octanol	octanol	N2	32	17	49	-0.306122	yes
Lithobius sp.	2	L4	empty mesh	chilopod	chilopod	MY2079	20	22	42	0.047619	yes
Lithobius sp.	2	L4	empty mesh	chilopod	chilopod	N2	16	40	56	0.428571	yes
Lithobius sp.	2	L4	empty	empty	empty	MY2079	16	18	34	0.0588235	yes
Lithobius sp.	2	L4	empty	empty	empty	N2	21	33	54	0.222222	yes
Lithobius sp.	2	L4	empty paper	isoamylalc	isoamylalc	MY2079	15	33	48	0.375	yes
Lithobius sp.	2	L4	empty paper	isoamylalc	isoamylalc	N2	2	60	62	0.935484	yes
Lithobius sp.	2	L4	empty paper	octanol	octanol	MY2079	30	15	45	-0.333333	yes
Lithobius sp.	2	L4	empty paper	octanol	octanol	N2	39	8	47	-0.659574	yes
Lithobius sp.	3	L4	empty mesh	chilopod	chilopod	MY2079	33	24	57	-0.157895	yes
Lithobius sp.	3	L4	empty mesh	chilopod	chilopod	N2	22	17	39	-0.128205	yes
Lithobius sp.	3	L4	empty	empty	empty	MY2079	21	30	51	0.176471	yes
Lithobius sp.	3	L4	empty	empty	empty	N2	30	33	63	0.047619	yes
Lithobius sp.	3	L4	empty paper	isoamylalc	isoamylalc	MY2079	15	54	69	0.565217	yes
Lithobius sp.	3	L4	empty paper	isoamylalc	isoamylalc	N2	0	74	74	1	yes
Lithobius sp.	3	L4	empty paper	octanol	octanol	MY2079	22	14	36	-0.222222	yes
Lithobius sp.	3	L4	empty paper	octanol	octanol	N2	75	28	103	-0.456311	yes
Lithobius sp.	4	L4	chilopod	empty mesh	chilopod	MY2079	19	12	31	0.225806	yes
Lithobius sp.	4	L4	chilopod	empty mesh	chilopod	N2	21	35	56	-0.25	yes
Lithobius sp.	4	L4	empty	empty	empty	MY2079	16	15	31	0.0322581	yes
Lithobius sp.	4	L4	empty	empty	empty	N2	18	18	36	0	yes
Lithobius sp.	4	L4	isoamylalc	empty paper	isoamylalc	MY2079	24	9	33	0.454545	yes
Lithobius sp.	4	L4	isoamylalc	empty paper	isoamylalc	N2	43	7	50	0.72	yes
Lithobius sp.	4	L4	octanol	empty paper	octanol	MY2079	14	23	37	-0.243243	yes
Lithobius sp.	4	L4	octanol	empty paper	octanol	N2	11	33	44	-0.5	yes
Lithobius sp.	5	L4	chilopod	empty mesh	chilopod	MY2079	28	25	53	0.0566038	yes
Lithobius sp.	5	L4	chilopod	empty mesh	chilopod	N2	26	21	47	0.106383	yes
Lithobius sp.	5	L4	empty	empty	empty	MY2079	49	53	102	-0.0392157	yes
Lithobius sp.	5	L4	empty	empty	empty	N2	21	24	45	-0.0666667	yes
Lithobius sp.	5	L4	isoamylalc	empty paper	isoamylalc	MY2079	56	29	85	0.317647	yes
Lithobius sp.	5	L4	isoamylalc	empty paper	isoamylalc	N2	44	1	45	0.955556	yes
Lithobius sp.	5	L4	octanol	empty paper	octanol	MY2079	36	42	78	-0.0769231	yes
Lithobius sp.	5	L4	octanol	empty paper	octanol	N2	17	25	42	-0.190476	yes
Lithobius sp.	6	L4	chilopod	empty mesh	chilopod	MY2079	16	11	27	0.185185	yes
Lithobius sp.	6	L4	chilopod	empty mesh	chilopod	N2	74	79	153	-0.0326797	yes
Lithobius sp.	6	L4	empty	empty	empty	MY2079	4	8	12	-0.333333	yes
Lithobius sp.	6	L4	empty	empty	empty	N2	44	36	80	0.1	yes
Lithobius sp.	6	L4	isoamylalc	empty paper	isoamylalc	MY2079	25	15	40	0.25	yes
Lithobius sp.	6	L4	isoamylalc	empty paper	isoamylalc	N2	72	11	83	0.73494	yes
Lithobius sp.	6	L4	octanol	empty paper	octanol	MY2079	22	23	45	-0.0222222	yes
Lithobius sp.	6	L4	octanol	empty paper	octanol	N2	48	50	98	-0.0204082	yes
Lithobius sp.	7	L4	empty mesh	chilopod	chilopod	MY2079	15	17	32	0.0625	yes
Lithobius sp.	7	L4	empty mesh	chilopod	chilopod	N2	24	23	47	-0.0212766	yes
Lithobius sp.	7	L4	empty	empty	empty	MY2079	17	22	39	0.128205	yes
Lithobius sp.	7	L4	empty	empty	empty	N2	24	25	49	0.0204082	yes
Lithobius sp.	7	L4	empty paper	isoamylalc	isoamylalc	MY2079	7	28	35	0.6	yes
Lithobius sp.	7	L4	empty paper	isoamylalc	isoamylalc	N2	2	39	41	0.902439	yes
Lithobius sp.	7	L4	empty paper	octanol	octanol	MY2079	24	18	42	-0.142857	yes
Lithobius sp.	7	L4	empty paper	octanol	octanol	N2	67	20	87	-0.54023	yes
Lithobius sp.	8	L4	empty mesh	chilopod	chilopod	MY2079	19	17	36	-0.0555556	yes
Lithobius sp.	8	L4	empty mesh	chilopod	chilopod	N2	43	52	95	0.0947368	yes
Lithobius sp.	8	L4	empty	empty	empty	MY2079	18	13	31	-0.16129	yes
Lithobius sp.	8	L4	empty	empty	empty	N2	39	39	78	0	yes
Lithobius sp.	8	L4	empty paper	isoamylalc	isoamylalc	MY2079	7	30	37	0.621622	yes
Lithobius sp.	8	L4	empty paper	isoamylalc	isoamylalc	N2	5	58	63	0.84127	yes
Lithobius sp.	8	L4	empty paper	octanol	octanol	MY2079	11	16	27	0.185185	yes
Lithobius sp.	8	L4	empty paper	octanol	octanol	N2	63	40	103	-0.223301	yes
Lithobius sp.	9	L4	empty mesh	chilopod	chilopod	MY2079	45	60	105	0.142857	yes
Lithobius sp.	9	L4	empty mesh	chilopod	chilopod	N2	12	20	32	0.25	yes
Lithobius sp.	9	L4	empty	empty	empty	MY2079	46	23	69	-0.333333	yes
Lithobius sp.	9	L4	empty	empty	empty	N2	25	37	62	0.193548	yes
Lithobius sp.	9	L4	empty paper	isoamylalc	isoamylalc	MY2079	28	22	50	-0.12	yes
Lithobius sp.	9	L4	empty paper	isoamylalc	isoamylalc	N2	5	47	52	0.807692	yes
Lithobius sp.	9	L4	empty paper	octanol	octanol	MY2079	34	35	69	0.0144928	yes
Lithobius sp.	9	L4	empty paper	octanol	octanol	N2	39	9	48	-0.625	yes
Lithobius sp.	10	L4	chilopod	empty mesh	chilopod	MY2079	14	35	49	-0.428571	yes
Lithobius sp.	10	L4	chilopod	empty mesh	chilopod	N2	19	21	40	-0.05	yes
Lithobius sp.	10	L4	empty	empty	empty	MY2079	18	5	23	0.565217	yes
Lithobius sp.	10	L4	empty	empty	empty	N2	20	22	42	-0.047619	yes
Lithobius sp.	10	L4	isoamylalc	empty paper	isoamylalc	MY2079	16	10	26	0.230769	yes
Lithobius sp.	10	L4	isoamylalc	empty paper	isoamylalc	N2	61	3	64	0.90625	yes
Lithobius sp.	10	L4	octanol	empty paper	octanol	MY2079	6	17	23	-0.478261	yes
Lithobius sp.	10	L4	octanol	empty paper	octanol	N2	17	52	69	-0.507246	yes
Lithobius sp.	11	L4	chilopod	empty mesh	chilopod	MY2079	32	11	43	0.488372	yes
Lithobius sp.	11	L4	chilopod	empty mesh	chilopod	N2	28	28	56	0	yes
Lithobius sp.	11	L4	empty	empty	empty	MY2079	29	20	49	0.183673	yes
Lithobius sp.	11	L4	empty	empty	empty	N2	21	36	57	-0.263158	yes
Lithobius sp.	11	L4	isoamylalc	empty paper	isoamylalc	MY2079	25	10	35	0.428571	yes
Lithobius sp.	11	L4	isoamylalc	empty paper	isoamylalc	N2	56	2	58	0.931034	yes
Lithobius sp.	11	L4	octanol	empty paper	octanol	MY2079	10	16	26	-0.230769	yes
Lithobius sp.	11	L4	octanol	empty paper	octanol	N2	29	29	58	0	yes
Lithobius sp.	12	L4	chilopod	empty mesh	chilopod	MY2079	25	6	31	0.612903	yes
Lithobius sp.	12	L4	chilopod	empty mesh	chilopod	N2	15	30	45	-0.333333	yes
Lithobius sp.	12	L4	empty	empty	empty	MY2079	35	17	52	0.346154	yes
Lithobius sp.	12	L4	empty	empty	empty	N2	25	38	63	-0.206349	yes
Lithobius sp.	12	L4	isoamylalc	empty paper	isoamylalc	MY2079	30	16	46	0.304348	yes
Lithobius sp.	12	L4	isoamylalc	empty paper	isoamylalc	N2	56	0	56	1	yes
Lithobius sp.	12	L4	octanol	empty paper	octanol	MY2079	19	16	35	0.0857143	yes
Lithobius sp.	12	L4	octanol	empty paper	octanol	N2	26	27	53	-0.0188679	yes

## Sheet: 4E Lithobius sp. gas dauer
invertebrate_species	rep	worm_stage	treat_left	treat_right	choice_treat	worm_strain	count_left	count_right	total	index	include	comments
Lithobius sp.	1	dauer	empty mesh	chilopod	chilopod	MY2079	36	38	74	0.027027	yes
Lithobius sp.	1	dauer	empty mesh	chilopod	chilopod	N2	45	52	97	0.0721649	yes
Lithobius sp.	1	dauer	empty	empty	empty	MY2079	37	50	87	0.149425	yes
Lithobius sp.	1	dauer	empty	empty	empty	N2	44	59	103	0.145631	yes
Lithobius sp.	1	dauer	empty paper	isoamylalc	isoamylalc	MY2079	11	32	43	0.488372	yes
Lithobius sp.	1	dauer	empty paper	isoamylalc	isoamylalc	N2	17	185	202	0.831683	yes
Lithobius sp.	1	dauer	empty paper	octanol	octanol	MY2079	31	51	82	0.243902	yes
Lithobius sp.	1	dauer	empty paper	octanol	octanol	N2	67	81	148	0.0945946	yes
Lithobius sp.	2	dauer	empty mesh	chilopod	chilopod	MY2079	47	33	80	-0.175	yes
Lithobius sp.	2	dauer	empty mesh	chilopod	chilopod	N2	20	11	31	-0.290323	yes
Lithobius sp.	2	dauer	empty	empty	empty	MY2079	29	40	69	0.15942	yes
Lithobius sp.	2	dauer	empty	empty	empty	N2	39	37	76	-0.0263158	yes
Lithobius sp.	2	dauer	empty paper	isoamylalc	isoamylalc	MY2079	12	85	97	0.752577	yes
Lithobius sp.	2	dauer	empty paper	isoamylalc	isoamylalc	N2	12	109	121	0.801653	yes
Lithobius sp.	2	dauer	empty paper	octanol	octanol	MY2079	25	47	72	0.305556	yes
Lithobius sp.	2	dauer	empty paper	octanol	octanol	N2	69	38	107	-0.28972	yes
Lithobius sp.	3	dauer	empty mesh	chilopod	chilopod	MY2079	NA	NA	NA	NA	no	myriapod escaped, exclude
Lithobius sp.	3	dauer	empty mesh	chilopod	chilopod	N2	49	33	82	-0.195122	yes
Lithobius sp.	3	dauer	empty	empty	empty	MY2079	22	26	48	0.0833333	yes
Lithobius sp.	3	dauer	empty	empty	empty	N2	29	41	70	0.171429	yes
Lithobius sp.	3	dauer	empty paper	isoamylalc	isoamylalc	MY2079	3	23	26	0.769231	yes
Lithobius sp.	3	dauer	empty paper	isoamylalc	isoamylalc	N2	6	110	116	0.896552	yes
Lithobius sp.	3	dauer	empty paper	octanol	octanol	MY2079	6	33	39	0.692308	yes
Lithobius sp.	3	dauer	empty paper	octanol	octanol	N2	16	18	34	0.0588235	yes
Lithobius sp.	4	dauer	chilopod	empty mesh	chilopod	MY2079	21	42	63	-0.333333	yes
Lithobius sp.	4	dauer	chilopod	empty mesh	chilopod	N2	10	18	28	-0.285714	yes
Lithobius sp.	4	dauer	empty	empty	empty	MY2079	36	37	73	-0.0136986	yes
Lithobius sp.	4	dauer	empty	empty	empty	N2	10	12	22	-0.0909091	yes
Lithobius sp.	4	dauer	isoamylalc	empty paper	isoamylalc	MY2079	34	15	49	0.387755	yes
Lithobius sp.	4	dauer	isoamylalc	empty paper	isoamylalc	N2	34	6	40	0.7	yes
Lithobius sp.	4	dauer	octanol	empty paper	octanol	MY2079	25	29	54	-0.0740741	yes
Lithobius sp.	4	dauer	octanol	empty paper	octanol	N2	2	15	17	-0.764706	yes
Lithobius sp.	5	dauer	chilopod	empty mesh	chilopod	MY2079	33	25	58	0.137931	yes
Lithobius sp.	5	dauer	chilopod	empty mesh	chilopod	N2	16	6	22	0.454545	yes
Lithobius sp.	5	dauer	empty	empty	empty	MY2079	25	47	72	-0.305556	yes
Lithobius sp.	5	dauer	empty	empty	empty	N2	13	12	25	0.04	yes
Lithobius sp.	5	dauer	isoamylalc	empty paper	isoamylalc	MY2079	25	2	27	0.851852	yes
Lithobius sp.	5	dauer	isoamylalc	empty paper	isoamylalc	N2	62	8	70	0.771429	yes
Lithobius sp.	5	dauer	octanol	empty paper	octanol	MY2079	41	45	86	-0.0465116	yes
Lithobius sp.	5	dauer	octanol	empty paper	octanol	N2	11	38	49	-0.55102	yes
Lithobius sp.	6	dauer	chilopod	empty mesh	chilopod	MY2079	36	25	61	0.180328	yes
Lithobius sp.	6	dauer	chilopod	empty mesh	chilopod	N2	28	34	62	-0.0967742	yes
Lithobius sp.	6	dauer	empty	empty	empty	MY2079	87	86	173	0.00578035	yes
Lithobius sp.	6	dauer	empty	empty	empty	N2	22	28	50	-0.12	yes
Lithobius sp.	6	dauer	isoamylalc	empty paper	isoamylalc	MY2079	50	7	57	0.754386	yes
Lithobius sp.	6	dauer	isoamylalc	empty paper	isoamylalc	N2	62	6	68	0.823529	yes
Lithobius sp.	6	dauer	octanol	empty paper	octanol	MY2079	47	15	62	0.516129	yes
Lithobius sp.	6	dauer	octanol	empty paper	octanol	N2	22	22	44	0	yes
Lithobius sp.	7	dauer	empty mesh	chilopod	chilopod	MY2079	26	21	47	-0.106383	yes
Lithobius sp.	7	dauer	empty mesh	chilopod	chilopod	N2	7	9	16	0.125	yes
Lithobius sp.	7	dauer	empty	empty	empty	MY2079	17	22	39	0.128205	yes
Lithobius sp.	7	dauer	empty	empty	empty	N2	2	11	13	0.692308	yes
Lithobius sp.	7	dauer	empty paper	isoamylalc	isoamylalc	MY2079	14	48	62	0.548387	yes
Lithobius sp.	7	dauer	empty paper	isoamylalc	isoamylalc	N2	1	12	13	0.846154	yes
Lithobius sp.	7	dauer	empty paper	octanol	octanol	MY2079	10	26	36	0.444444	yes
Lithobius sp.	7	dauer	empty paper	octanol	octanol	N2	16	14	30	-0.0666667	yes
Lithobius sp.	8	dauer	empty mesh	chilopod	chilopod	MY2079	18	20	38	0.0526316	yes
Lithobius sp.	8	dauer	empty mesh	chilopod	chilopod	N2	33	28	61	-0.0819672	yes
Lithobius sp.	8	dauer	empty	empty	empty	MY2079	33	22	55	-0.2	yes
Lithobius sp.	8	dauer	empty	empty	empty	N2	19	15	34	-0.117647	yes
Lithobius sp.	8	dauer	empty paper	isoamylalc	isoamylalc	MY2079	13	40	53	0.509434	yes
Lithobius sp.	8	dauer	empty paper	isoamylalc	isoamylalc	N2	7	62	69	0.797101	yes
Lithobius sp.	8	dauer	empty paper	octanol	octanol	MY2079	22	27	49	0.102041	yes
Lithobius sp.	8	dauer	empty paper	octanol	octanol	N2	26	23	49	-0.0612245	yes
Lithobius sp.	9	dauer	empty mesh	chilopod	chilopod	MY2079	46	50	96	0.0416667	yes
Lithobius sp.	9	dauer	empty mesh	chilopod	chilopod	N2	13	19	32	0.1875	yes
Lithobius sp.	9	dauer	empty	empty	empty	MY2079	44	60	104	0.153846	yes
Lithobius sp.	9	dauer	empty	empty	empty	N2	36	30	66	-0.0909091	yes
Lithobius sp.	9	dauer	empty paper	isoamylalc	isoamylalc	MY2079	26	97	123	0.577236	yes
Lithobius sp.	9	dauer	empty paper	isoamylalc	isoamylalc	N2	3	50	53	0.886792	yes
Lithobius sp.	9	dauer	empty paper	octanol	octanol	MY2079	51	42	93	-0.0967742	yes
Lithobius sp.	9	dauer	empty paper	octanol	octanol	N2	19	13	32	-0.1875	yes
Lithobius sp.	10	dauer	chilopod	empty mesh	chilopod	MY2079	36	39	75	-0.04	yes
Lithobius sp.	10	dauer	chilopod	empty mesh	chilopod	N2	15	9	24	0.25	yes
Lithobius sp.	10	dauer	empty	empty	empty	MY2079	45	49	94	-0.0425532	yes
Lithobius sp.	10	dauer	empty	empty	empty	N2	8	12	20	-0.2	yes
Lithobius sp.	10	dauer	isoamylalc	empty paper	isoamylalc	MY2079	46	4	50	0.84	yes
Lithobius sp.	10	dauer	isoamylalc	empty paper	isoamylalc	N2	26	1	27	0.925926	yes
Lithobius sp.	10	dauer	octanol	empty paper	octanol	MY2079	39	34	73	0.0684932	yes
Lithobius sp.	10	dauer	octanol	empty paper	octanol	N2	8	9	17	-0.0588235	yes
Lithobius sp.	11	dauer	chilopod	empty mesh	chilopod	MY2079	48	28	76	0.263158	yes
Lithobius sp.	11	dauer	chilopod	empty mesh	chilopod	N2	14	10	24	0.166667	yes
Lithobius sp.	11	dauer	empty	empty	empty	MY2079	34	50	84	-0.190476	yes
Lithobius sp.	11	dauer	empty	empty	empty	N2	24	23	47	0.0212766	yes
Lithobius sp.	11	dauer	isoamylalc	empty paper	isoamylalc	MY2079	51	13	64	0.59375	yes
Lithobius sp.	11	dauer	isoamylalc	empty paper	isoamylalc	N2	13	1	14	NA	no	small contamination on treat right, exclude
Lithobius sp.	11	dauer	octanol	empty paper	octanol	MY2079	39	42	81	-0.037037	yes
Lithobius sp.	11	dauer	octanol	empty paper	octanol	N2	12	10	22	0.0909091	yes
Lithobius sp.	12	dauer	chilopod	empty mesh	chilopod	MY2079	66	53	119	0.109244	yes
Lithobius sp.	12	dauer	chilopod	empty mesh	chilopod	N2	53	31	84	0.261905	yes
Lithobius sp.	12	dauer	empty	empty	empty	MY2079	41	32	73	0.123288	yes
Lithobius sp.	12	dauer	empty	empty	empty	N2	96	65	161	0.192547	yes
Lithobius sp.	12	dauer	isoamylalc	empty paper	isoamylalc	MY2079	26	5	31	0.677419	yes
Lithobius sp.	12	dauer	isoamylalc	empty paper	isoamylalc	N2	74	10	84	0.761905	yes
Lithobius sp.	12	dauer	octanol	empty paper	octanol	MY2079	34	23	57	0.192982	yes
Lithobius sp.	12	dauer	octanol	empty paper	octanol	N2	15	26	41	-0.268293	yes

## Sheet: 4F D. melanogaster gas L4
invertebrate_species	rep	worm_stage	treat_left	treat_right	choice_treat	worm_strain	count_left	count_right	total	index	include	comments
Drosophila melanogaster	1	L4	empty mesh	Drosophila	Drosophila	MY2079	21	23	44	0.0454545	yes
Drosophila melanogaster	1	L4	empty mesh	Drosophila	Drosophila	N2	53	60	113	0.0619469	yes
Drosophila melanogaster	1	L4	empty	empty	empty	MY2079	36	10	46	-0.565217	yes
Drosophila melanogaster	1	L4	empty	empty	empty	N2	44	43	87	-0.0114943	yes
Drosophila melanogaster	1	L4	empty paper	isoamylalc	isoamylalc	MY2079	17	39	56	0.392857	yes
Drosophila melanogaster	1	L4	empty paper	isoamylalc	isoamylalc	N2	6	72	78	0.846154	yes
Drosophila melanogaster	1	L4	empty paper	octanol	octanol	MY2079	30	18	48	-0.25	yes
Drosophila melanogaster	1	L4	empty paper	octanol	octanol	N2	89	26	115	-0.547826	yes
Drosophila melanogaster	2	L4	empty mesh	Drosophila	Drosophila	MY2079	33	25	58	-0.137931	yes
Drosophila melanogaster	2	L4	empty mesh	Drosophila	Drosophila	N2	16	27	43	0.255814	yes
Drosophila melanogaster	2	L4	empty	empty	empty	MY2079	28	8	36	-0.555556	yes
Drosophila melanogaster	2	L4	empty	empty	empty	N2	40	29	69	-0.15942	yes
Drosophila melanogaster	2	L4	empty paper	isoamylalc	isoamylalc	MY2079	23	42	65	0.292308	yes
Drosophila melanogaster	2	L4	empty paper	isoamylalc	isoamylalc	N2	1	63	64	0.96875	yes
Drosophila melanogaster	2	L4	empty paper	octanol	octanol	MY2079	28	23	51	-0.0980392	yes
Drosophila melanogaster	2	L4	empty paper	octanol	octanol	N2	63	19	82	-0.536585	yes
Drosophila melanogaster	3	L4	Drosophila	empty mesh	Drosophila	MY2079	57	29	86	0.325581	yes
Drosophila melanogaster	3	L4	Drosophila	empty mesh	Drosophila	N2	57	49	106	0.0754717	yes
Drosophila melanogaster	3	L4	empty	empty	empty	MY2079	20	12	32	0.25	yes
Drosophila melanogaster	3	L4	empty	empty	empty	N2	27	21	48	0.125	yes
Drosophila melanogaster	3	L4	isoamylalc	empty paper	isoamylalc	MY2079	39	17	56	0.392857	yes
Drosophila melanogaster	3	L4	isoamylalc	empty paper	isoamylalc	N2	45	0	45	1	yes
Drosophila melanogaster	3	L4	octanol	empty paper	octanol	MY2079	29	33	62	-0.0645161	yes
Drosophila melanogaster	3	L4	octanol	empty paper	octanol	N2	15	42	57	-0.473684	yes
Drosophila melanogaster	4	L4	Drosophila	empty mesh	Drosophila	MY2079	18	36	54	-0.333333	yes
Drosophila melanogaster	4	L4	Drosophila	empty mesh	Drosophila	N2	63	52	115	0.0956522	yes
Drosophila melanogaster	4	L4	empty	empty	empty	MY2079	33	34	67	-0.0149254	yes
Drosophila melanogaster	4	L4	empty	empty	empty	N2	19	34	53	-0.283019	yes
Drosophila melanogaster	4	L4	isoamylalc	empty paper	isoamylalc	MY2079	27	22	49	0.102041	yes
Drosophila melanogaster	4	L4	isoamylalc	empty paper	isoamylalc	N2	55	6	61	0.803279	yes
Drosophila melanogaster	4	L4	octanol	empty paper	octanol	MY2079	28	49	77	-0.272727	yes
Drosophila melanogaster	4	L4	octanol	empty paper	octanol	N2	19	55	74	-0.486486	yes
Drosophila melanogaster	5	L4	Drosophila	empty mesh	Drosophila	MY2079	89	45	134	0.328358	yes
Drosophila melanogaster	5	L4	Drosophila	empty mesh	Drosophila	N2	35	35	70	0	yes
Drosophila melanogaster	5	L4	empty	empty	empty	MY2079	41	32	73	0.123288	yes
Drosophila melanogaster	5	L4	empty	empty	empty	N2	70	30	100	0.4	yes
Drosophila melanogaster	5	L4	isoamylalc	empty paper	isoamylalc	MY2079	48	39	87	0.103448	yes
Drosophila melanogaster	5	L4	isoamylalc	empty paper	isoamylalc	N2	86	10	96	0.791667	yes
Drosophila melanogaster	5	L4	octanol	empty paper	octanol	MY2079	47	47	94	0	yes
Drosophila melanogaster	5	L4	octanol	empty paper	octanol	N2	8	92	100	-0.84	yes
Drosophila melanogaster	6	L4	Drosophila	empty mesh	Drosophila	MY2079	32	45	77	-0.168831	yes
Drosophila melanogaster	6	L4	Drosophila	empty mesh	Drosophila	N2	23	8	31	0.483871	yes
Drosophila melanogaster	6	L4	empty	empty	empty	MY2079	30	33	63	-0.047619	yes
Drosophila melanogaster	6	L4	empty	empty	empty	N2	57	22	79	0.443038	yes
Drosophila melanogaster	6	L4	isoamylalc	empty paper	isoamylalc	MY2079	30	5	35	0.714286	yes
Drosophila melanogaster	6	L4	isoamylalc	empty paper	isoamylalc	N2	13	32	45	-0.422222	yes
Drosophila melanogaster	6	L4	octanol	empty paper	octanol	MY2079	11	41	52	-0.576923	yes
Drosophila melanogaster	6	L4	octanol	empty paper	octanol	N2	7	54	61	-0.770492	yes
Drosophila melanogaster	7	L4	empty mesh	Drosophila	Drosophila	MY2079	33	8	41	-0.609756	yes
Drosophila melanogaster	7	L4	empty mesh	Drosophila	Drosophila	N2	26	42	68	0.235294	yes
Drosophila melanogaster	7	L4	empty	empty	empty	MY2079	22	17	39	-0.128205	yes
Drosophila melanogaster	7	L4	empty	empty	empty	N2	52	62	114	0.0877193	yes
Drosophila melanogaster	7	L4	empty paper	isoamylalc	isoamylalc	MY2079	13	29	42	0.380952	yes
Drosophila melanogaster	7	L4	empty paper	isoamylalc	isoamylalc	N2	0	100	100	1	yes
Drosophila melanogaster	7	L4	empty paper	octanol	octanol	MY2079	27	9	36	-0.5	yes
Drosophila melanogaster	7	L4	empty paper	octanol	octanol	N2	65	28	93	-0.397849	yes
Drosophila melanogaster	8	L4	empty mesh	Drosophila	Drosophila	MY2079	46	14	60	-0.533333	yes
Drosophila melanogaster	8	L4	empty mesh	Drosophila	Drosophila	N2	25	28	53	0.0566038	yes
Drosophila melanogaster	8	L4	empty	empty	empty	MY2079	35	15	50	-0.4	yes
Drosophila melanogaster	8	L4	empty	empty	empty	N2	47	44	91	-0.032967	yes
Drosophila melanogaster	8	L4	empty paper	isoamylalc	isoamylalc	MY2079	28	49	77	0.272727	yes
Drosophila melanogaster	8	L4	empty paper	isoamylalc	isoamylalc	N2	1	114	115	0.982609	yes
Drosophila melanogaster	8	L4	empty paper	octanol	octanol	MY2079	34	14	48	-0.416667	yes
Drosophila melanogaster	8	L4	empty paper	octanol	octanol	N2	46	8	54	-0.703704	yes
Drosophila melanogaster	9	L4	empty mesh	Drosophila	Drosophila	MY2079	30	21	51	-0.176471	yes
Drosophila melanogaster	9	L4	empty mesh	Drosophila	Drosophila	N2	30	46	76	0.210526	yes
Drosophila melanogaster	9	L4	empty	empty	empty	MY2079	25	42	67	0.253731	yes
Drosophila melanogaster	9	L4	empty	empty	empty	N2	38	57	95	0.2	yes
Drosophila melanogaster	9	L4	empty paper	isoamylalc	isoamylalc	MY2079	34	39	73	0.0684932	yes
Drosophila melanogaster	9	L4	empty paper	isoamylalc	isoamylalc	N2	4	86	90	0.911111	yes
Drosophila melanogaster	9	L4	empty paper	octanol	octanol	MY2079	51	33	84	-0.214286	yes
Drosophila melanogaster	9	L4	empty paper	octanol	octanol	N2	46	33	79	-0.164557	yes
Drosophila melanogaster	10	L4	empty mesh	Drosophila	Drosophila	MY2079	23	21	44	-0.0454545	yes
Drosophila melanogaster	10	L4	empty mesh	Drosophila	Drosophila	N2	28	52	80	0.3	yes
Drosophila melanogaster	10	L4	empty	empty	empty	MY2079	39	31	70	-0.114286	yes
Drosophila melanogaster	10	L4	empty	empty	empty	N2	38	37	75	-0.0133333	yes
Drosophila melanogaster	10	L4	empty paper	isoamylalc	isoamylalc	MY2079	15	23	38	0.210526	yes
Drosophila melanogaster	10	L4	empty paper	isoamylalc	isoamylalc	N2	3	88	91	0.934066	yes
Drosophila melanogaster	10	L4	empty paper	octanol	octanol	MY2079	96	20	116	-0.655172	yes
Drosophila melanogaster	10	L4	empty paper	octanol	octanol	N2	81	27	108	-0.5	yes
Drosophila melanogaster	11	L4	Drosophila	empty mesh	Drosophila	MY2079	17	23	40	NA	no	Drosophila escaped, exclude
Drosophila melanogaster	11	L4	Drosophila	empty mesh	Drosophila	N2	67	62	129	0.0387597	yes
Drosophila melanogaster	11	L4	empty	empty	empty	MY2079	55	23	78	0.410256	yes
Drosophila melanogaster	11	L4	empty	empty	empty	N2	59	73	132	-0.106061	yes
Drosophila melanogaster	11	L4	isoamylalc	empty paper	isoamylalc	MY2079	27	8	35	0.542857	yes
Drosophila melanogaster	11	L4	isoamylalc	empty paper	isoamylalc	N2	100	8	108	0.851852	yes
Drosophila melanogaster	11	L4	octanol	empty paper	octanol	MY2079	21	56	77	-0.454545	yes
Drosophila melanogaster	11	L4	octanol	empty paper	octanol	N2	38	91	129	-0.410853	yes
Drosophila melanogaster	12	L4	Drosophila	empty mesh	Drosophila	MY2079	18	22	40	-0.1	yes
Drosophila melanogaster	12	L4	Drosophila	empty mesh	Drosophila	N2	64	53	117	0.0940171	yes
Drosophila melanogaster	12	L4	empty	empty	empty	MY2079	31	36	67	-0.0746269	yes
Drosophila melanogaster	12	L4	empty	empty	empty	N2	50	64	114	-0.122807	yes
Drosophila melanogaster	12	L4	isoamylalc	empty paper	isoamylalc	MY2079	48	17	65	0.476923	yes
Drosophila melanogaster	12	L4	isoamylalc	empty paper	isoamylalc	N2	161	7	168	0.916667	yes
Drosophila melanogaster	12	L4	octanol	empty paper	octanol	MY2079	13	23	36	-0.277778	yes
Drosophila melanogaster	12	L4	octanol	empty paper	octanol	N2	8	112	120	-0.866667	yes

## Sheet: 4F D. melanogaster gas dauer
invertebrate_species	rep	worm_stage	treat_left	treat_right	choice_treat	worm_strain	count_left	count_right	total	index	include	comments
Drosophila melanogaster	1	dauer	empty mesh	Drosophila	Drosophila	MY2079	84	77	161	-0.0434783	yes
Drosophila melanogaster	1	dauer	empty mesh	Drosophila	Drosophila	N2	9	8	17	-0.0588235	yes
Drosophila melanogaster	1	dauer	empty	empty	empty	MY2079	43	57	100	0.14	yes
Drosophila melanogaster	1	dauer	empty	empty	empty	N2	9	9	18	0	yes
Drosophila melanogaster	1	dauer	empty paper	isoamylalc	isoamylalc	MY2079	33	128	161	0.590062	yes
Drosophila melanogaster	1	dauer	empty paper	isoamylalc	isoamylalc	N2	11	57	68	0.676471	yes
Drosophila melanogaster	1	dauer	empty paper	octanol	octanol	MY2079	38	67	105	0.27619	yes
Drosophila melanogaster	1	dauer	empty paper	octanol	octanol	N2	8	15	23	0.304348	yes
Drosophila melanogaster	2	dauer	empty mesh	Drosophila	Drosophila	MY2079	48	58	106	0.0943396	yes
Drosophila melanogaster	2	dauer	empty mesh	Drosophila	Drosophila	N2	6	0	6	NA	no	threshold of 10 worms not reached, exclude
Drosophila melanogaster	2	dauer	empty	empty	empty	MY2079	21	63	84	0.5	yes
Drosophila melanogaster	2	dauer	empty	empty	empty	N2	30	28	58	-0.0344828	yes
Drosophila melanogaster	2	dauer	empty paper	isoamylalc	isoamylalc	MY2079	18	74	92	0.608696	yes
Drosophila melanogaster	2	dauer	empty paper	isoamylalc	isoamylalc	N2	4	32	36	0.777778	yes
Drosophila melanogaster	2	dauer	empty paper	octanol	octanol	MY2079	38	42	80	0.05	yes
Drosophila melanogaster	2	dauer	empty paper	octanol	octanol	N2	6	7	13	0.0769231	yes
Drosophila melanogaster	3	dauer	Drosophila	empty mesh	Drosophila	MY2079	67	54	121	0.107438	yes
Drosophila melanogaster	3	dauer	Drosophila	empty mesh	Drosophila	N2	70	13	83	0.686747	yes
Drosophila melanogaster	3	dauer	empty	empty	empty	MY2079	95	86	181	0.0497238	yes
Drosophila melanogaster	3	dauer	empty	empty	empty	N2	11	5	16	0.375	yes
Drosophila melanogaster	3	dauer	isoamylalc	empty paper	isoamylalc	MY2079	93	44	137	0.357664	yes
Drosophila melanogaster	3	dauer	isoamylalc	empty paper	isoamylalc	N2	26	1	27	0.925926	yes
Drosophila melanogaster	3	dauer	octanol	empty paper	octanol	MY2079	86	94	180	-0.0444444	yes
Drosophila melanogaster	3	dauer	octanol	empty paper	octanol	N2	20	8	28	0.428571	yes
Drosophila melanogaster	4	dauer	Drosophila	empty mesh	Drosophila	MY2079	33	30	63	0.047619	yes
Drosophila melanogaster	4	dauer	Drosophila	empty mesh	Drosophila	N2	36	11	47	0.531915	yes
Drosophila melanogaster	4	dauer	empty	empty	empty	MY2079	29	20	49	0.183673	yes
Drosophila melanogaster	4	dauer	empty	empty	empty	N2	12	15	27	-0.111111	yes
Drosophila melanogaster	4	dauer	isoamylalc	empty paper	isoamylalc	MY2079	24	10	34	0.411765	yes
Drosophila melanogaster	4	dauer	isoamylalc	empty paper	isoamylalc	N2	56	2	58	0.931034	yes
Drosophila melanogaster	4	dauer	octanol	empty paper	octanol	MY2079	36	23	59	0.220339	yes
Drosophila melanogaster	4	dauer	octanol	empty paper	octanol	N2	12	2	14	0.714286	yes
Drosophila melanogaster	5	dauer	Drosophila	empty mesh	Drosophila	MY2079	51	40	91	0.120879	yes
Drosophila melanogaster	5	dauer	Drosophila	empty mesh	Drosophila	N2	41	32	73	0.123288	yes
Drosophila melanogaster	5	dauer	empty	empty	empty	MY2079	44	68	112	-0.214286	yes
Drosophila melanogaster	5	dauer	empty	empty	empty	N2	61	78	139	-0.122302	yes
Drosophila melanogaster	5	dauer	isoamylalc	empty paper	isoamylalc	MY2079	66	48	114	0.157895	yes
Drosophila melanogaster	5	dauer	isoamylalc	empty paper	isoamylalc	N2	66	7	73	0.808219	yes
Drosophila melanogaster	5	dauer	octanol	empty paper	octanol	MY2079	51	56	107	-0.046729	yes
Drosophila melanogaster	5	dauer	octanol	empty paper	octanol	N2	15	22	37	-0.189189	yes
Drosophila melanogaster	6	dauer	Drosophila	empty mesh	Drosophila	MY2079	123	64	187	0.315508	yes
Drosophila melanogaster	6	dauer	Drosophila	empty mesh	Drosophila	N2	14	11	25	0.12	yes
Drosophila melanogaster	6	dauer	empty	empty	empty	MY2079	60	57	117	0.025641	yes
Drosophila melanogaster	6	dauer	empty	empty	empty	N2	44	56	100	-0.12	yes
Drosophila melanogaster	6	dauer	isoamylalc	empty paper	isoamylalc	MY2079	93	17	110	0.690909	yes
Drosophila melanogaster	6	dauer	isoamylalc	empty paper	isoamylalc	N2	77	10	87	0.770115	yes
Drosophila melanogaster	6	dauer	octanol	empty paper	octanol	MY2079	81	38	119	0.361345	yes
Drosophila melanogaster	6	dauer	octanol	empty paper	octanol	N2	18	40	58	-0.37931	yes
Drosophila melanogaster	7	dauer	empty mesh	Drosophila	Drosophila	MY2079	76	88	164	0.0731707	yes
Drosophila melanogaster	7	dauer	empty mesh	Drosophila	Drosophila	N2	17	43	60	0.433333	yes
Drosophila melanogaster	7	dauer	empty	empty	empty	MY2079	70	84	154	0.0909091	yes
Drosophila melanogaster	7	dauer	empty	empty	empty	N2	30	32	62	0.0322581	yes
Drosophila melanogaster	7	dauer	empty paper	isoamylalc	isoamylalc	MY2079	21	107	128	0.671875	yes
Drosophila melanogaster	7	dauer	empty paper	isoamylalc	isoamylalc	N2	10	47	57	0.649123	yes
Drosophila melanogaster	7	dauer	empty paper	octanol	octanol	MY2079	57	104	161	0.291925	yes
Drosophila melanogaster	7	dauer	empty paper	octanol	octanol	N2	42	22	64	-0.3125	yes
Drosophila melanogaster	8	dauer	empty mesh	Drosophila	Drosophila	MY2079	68	52	120	-0.133333	yes
Drosophila melanogaster	8	dauer	empty mesh	Drosophila	Drosophila	N2	37	50	87	0.149425	yes
Drosophila melanogaster	8	dauer	empty	empty	empty	MY2079	68	33	101	-0.346535	yes
Drosophila melanogaster	8	dauer	empty	empty	empty	N2	17	21	38	0.105263	yes
Drosophila melanogaster	8	dauer	empty paper	isoamylalc	isoamylalc	MY2079	40	116	156	0.487179	yes
Drosophila melanogaster	8	dauer	empty paper	isoamylalc	isoamylalc	N2	5	65	70	0.857143	yes
Drosophila melanogaster	8	dauer	empty paper	octanol	octanol	MY2079	106	35	141	-0.503546	yes
Drosophila melanogaster	8	dauer	empty paper	octanol	octanol	N2	52	21	73	-0.424658	yes
Drosophila melanogaster	9	dauer	empty mesh	Drosophila	Drosophila	MY2079	50	65	115	0.130435	yes
Drosophila melanogaster	9	dauer	empty mesh	Drosophila	Drosophila	N2	15	20	35	0.142857	yes
Drosophila melanogaster	9	dauer	empty	empty	empty	MY2079	84	82	166	-0.0120482	yes
Drosophila melanogaster	9	dauer	empty	empty	empty	N2	33	34	67	0.0149254	yes
Drosophila melanogaster	9	dauer	empty paper	isoamylalc	isoamylalc	MY2079	18	144	162	0.777778	yes
Drosophila melanogaster	9	dauer	empty paper	isoamylalc	isoamylalc	N2	10	48	58	0.655172	yes
Drosophila melanogaster	9	dauer	empty paper	octanol	octanol	MY2079	41	24	65	-0.261538	yes
Drosophila melanogaster	9	dauer	empty paper	octanol	octanol	N2	16	6	22	-0.454545	yes
Drosophila melanogaster	10	dauer	empty mesh	Drosophila	Drosophila	MY2079	93	94	187	0.00534759	yes
Drosophila melanogaster	10	dauer	empty mesh	Drosophila	Drosophila	N2	17	22	39	0.128205	yes
Drosophila melanogaster	10	dauer	empty	empty	empty	MY2079	74	64	138	-0.0724638	yes
Drosophila melanogaster	10	dauer	empty	empty	empty	N2	35	46	81	0.135802	yes
Drosophila melanogaster	10	dauer	empty paper	isoamylalc	isoamylalc	MY2079	38	117	155	0.509677	yes
Drosophila melanogaster	10	dauer	empty paper	isoamylalc	isoamylalc	N2	6	86	92	0.869565	yes
Drosophila melanogaster	10	dauer	empty paper	octanol	octanol	MY2079	90	72	162	-0.111111	yes
Drosophila melanogaster	10	dauer	empty paper	octanol	octanol	N2	27	37	64	0.15625	yes
Drosophila melanogaster	11	dauer	Drosophila	empty mesh	Drosophila	MY2079	80	61	141	0.134752	yes
Drosophila melanogaster	11	dauer	Drosophila	empty mesh	Drosophila	N2	32	33	65	-0.0153846	yes
Drosophila melanogaster	11	dauer	empty	empty	empty	MY2079	66	90	156	-0.153846	yes
Drosophila melanogaster	11	dauer	empty	empty	empty	N2	43	58	101	-0.148515	yes
Drosophila melanogaster	11	dauer	isoamylalc	empty paper	isoamylalc	MY2079	151	53	204	0.480392	yes
Drosophila melanogaster	11	dauer	isoamylalc	empty paper	isoamylalc	N2	101	7	108	0.87037	yes
Drosophila melanogaster	11	dauer	octanol	empty paper	octanol	MY2079	60	65	125	-0.04	yes
Drosophila melanogaster	11	dauer	octanol	empty paper	octanol	N2	36	80	116	-0.37931	yes
Drosophila melanogaster	12	dauer	Drosophila	empty mesh	Drosophila	MY2079	53	67	120	-0.116667	yes
Drosophila melanogaster	12	dauer	Drosophila	empty mesh	Drosophila	N2	21	34	55	-0.236364	yes
Drosophila melanogaster	12	dauer	empty	empty	empty	MY2079	94	66	160	0.175	yes
Drosophila melanogaster	12	dauer	empty	empty	empty	N2	16	17	33	-0.030303	yes
Drosophila melanogaster	12	dauer	isoamylalc	empty paper	isoamylalc	MY2079	69	22	91	0.516484	yes
Drosophila melanogaster	12	dauer	isoamylalc	empty paper	isoamylalc	N2	40	9	49	0.632653	yes
Drosophila melanogaster	12	dauer	octanol	empty paper	octanol	MY2079	110	67	177	0.242938	yes
Drosophila melanogaster	12	dauer	octanol	empty paper	octanol	N2	12	8	20	0.2	yes
